# Supplementary material for: Pursuing high efficiency in photocatalytic oxidative couplings of heteroarenes and aliphatic C–H bonds
Source: Royal Society of Chemistry journal article supplement (doi:10.1039/d2qo01558g), 2023-01-01

Supporting Information NMR Spectra

**Pursuing High Efficiency in Photocatalytic Oxidative Couplings of Heteroarenes and Aliphatic C-H bonds**

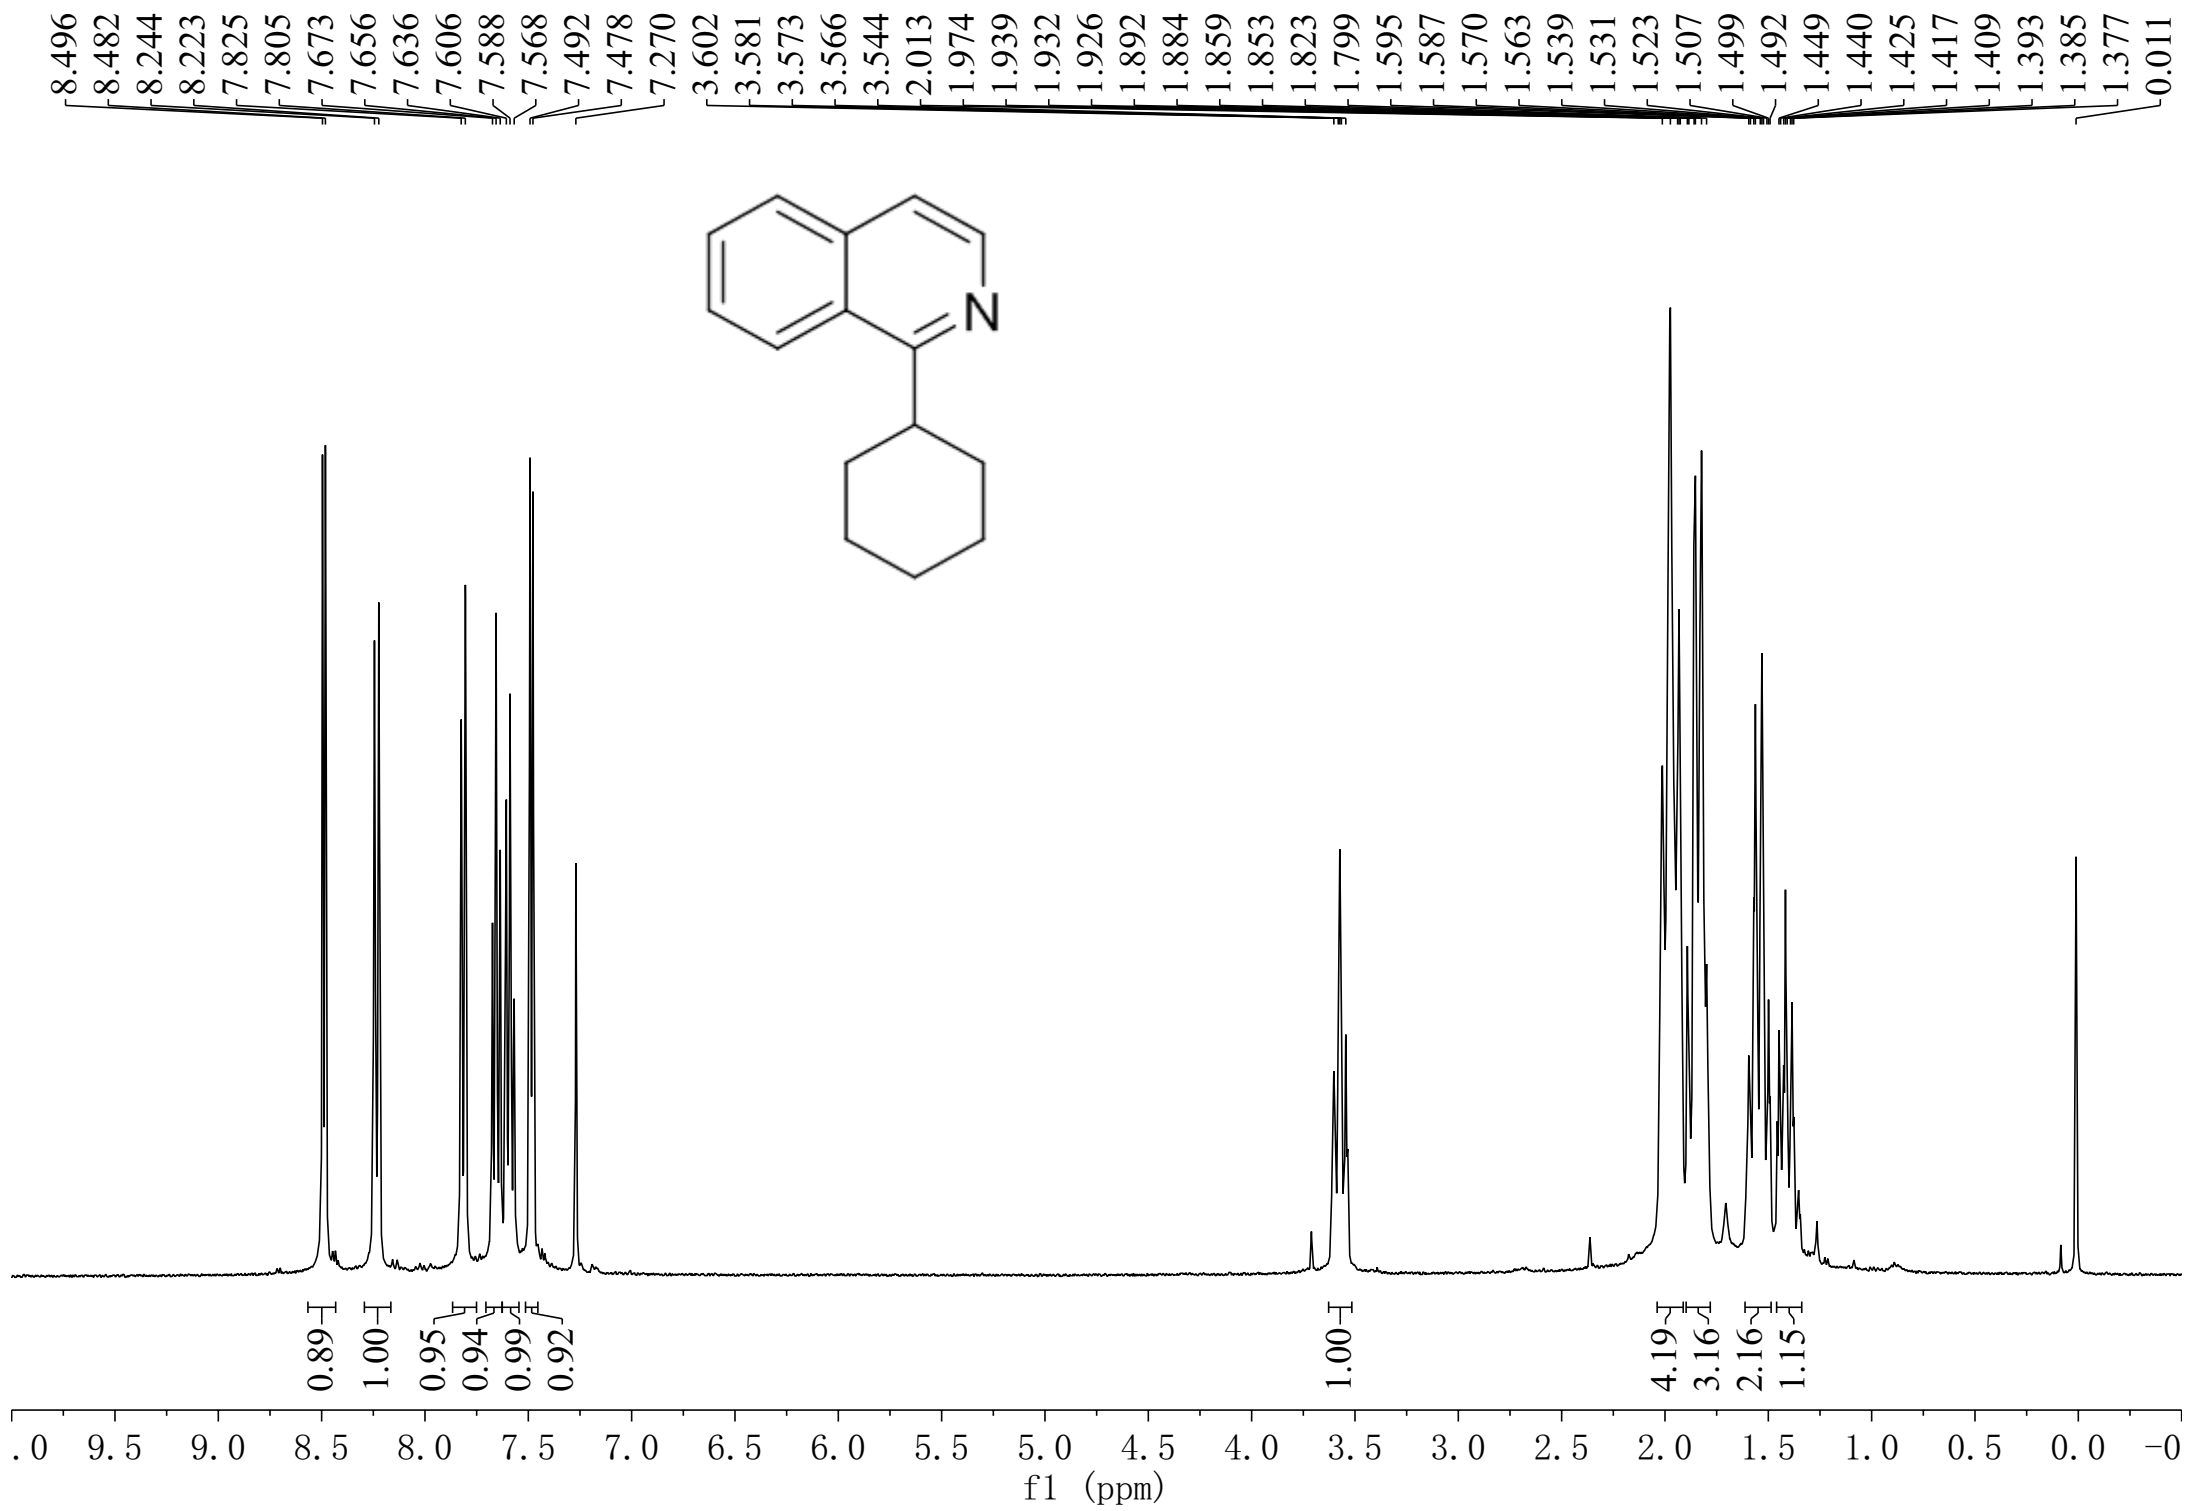

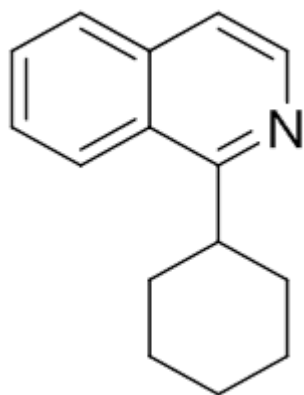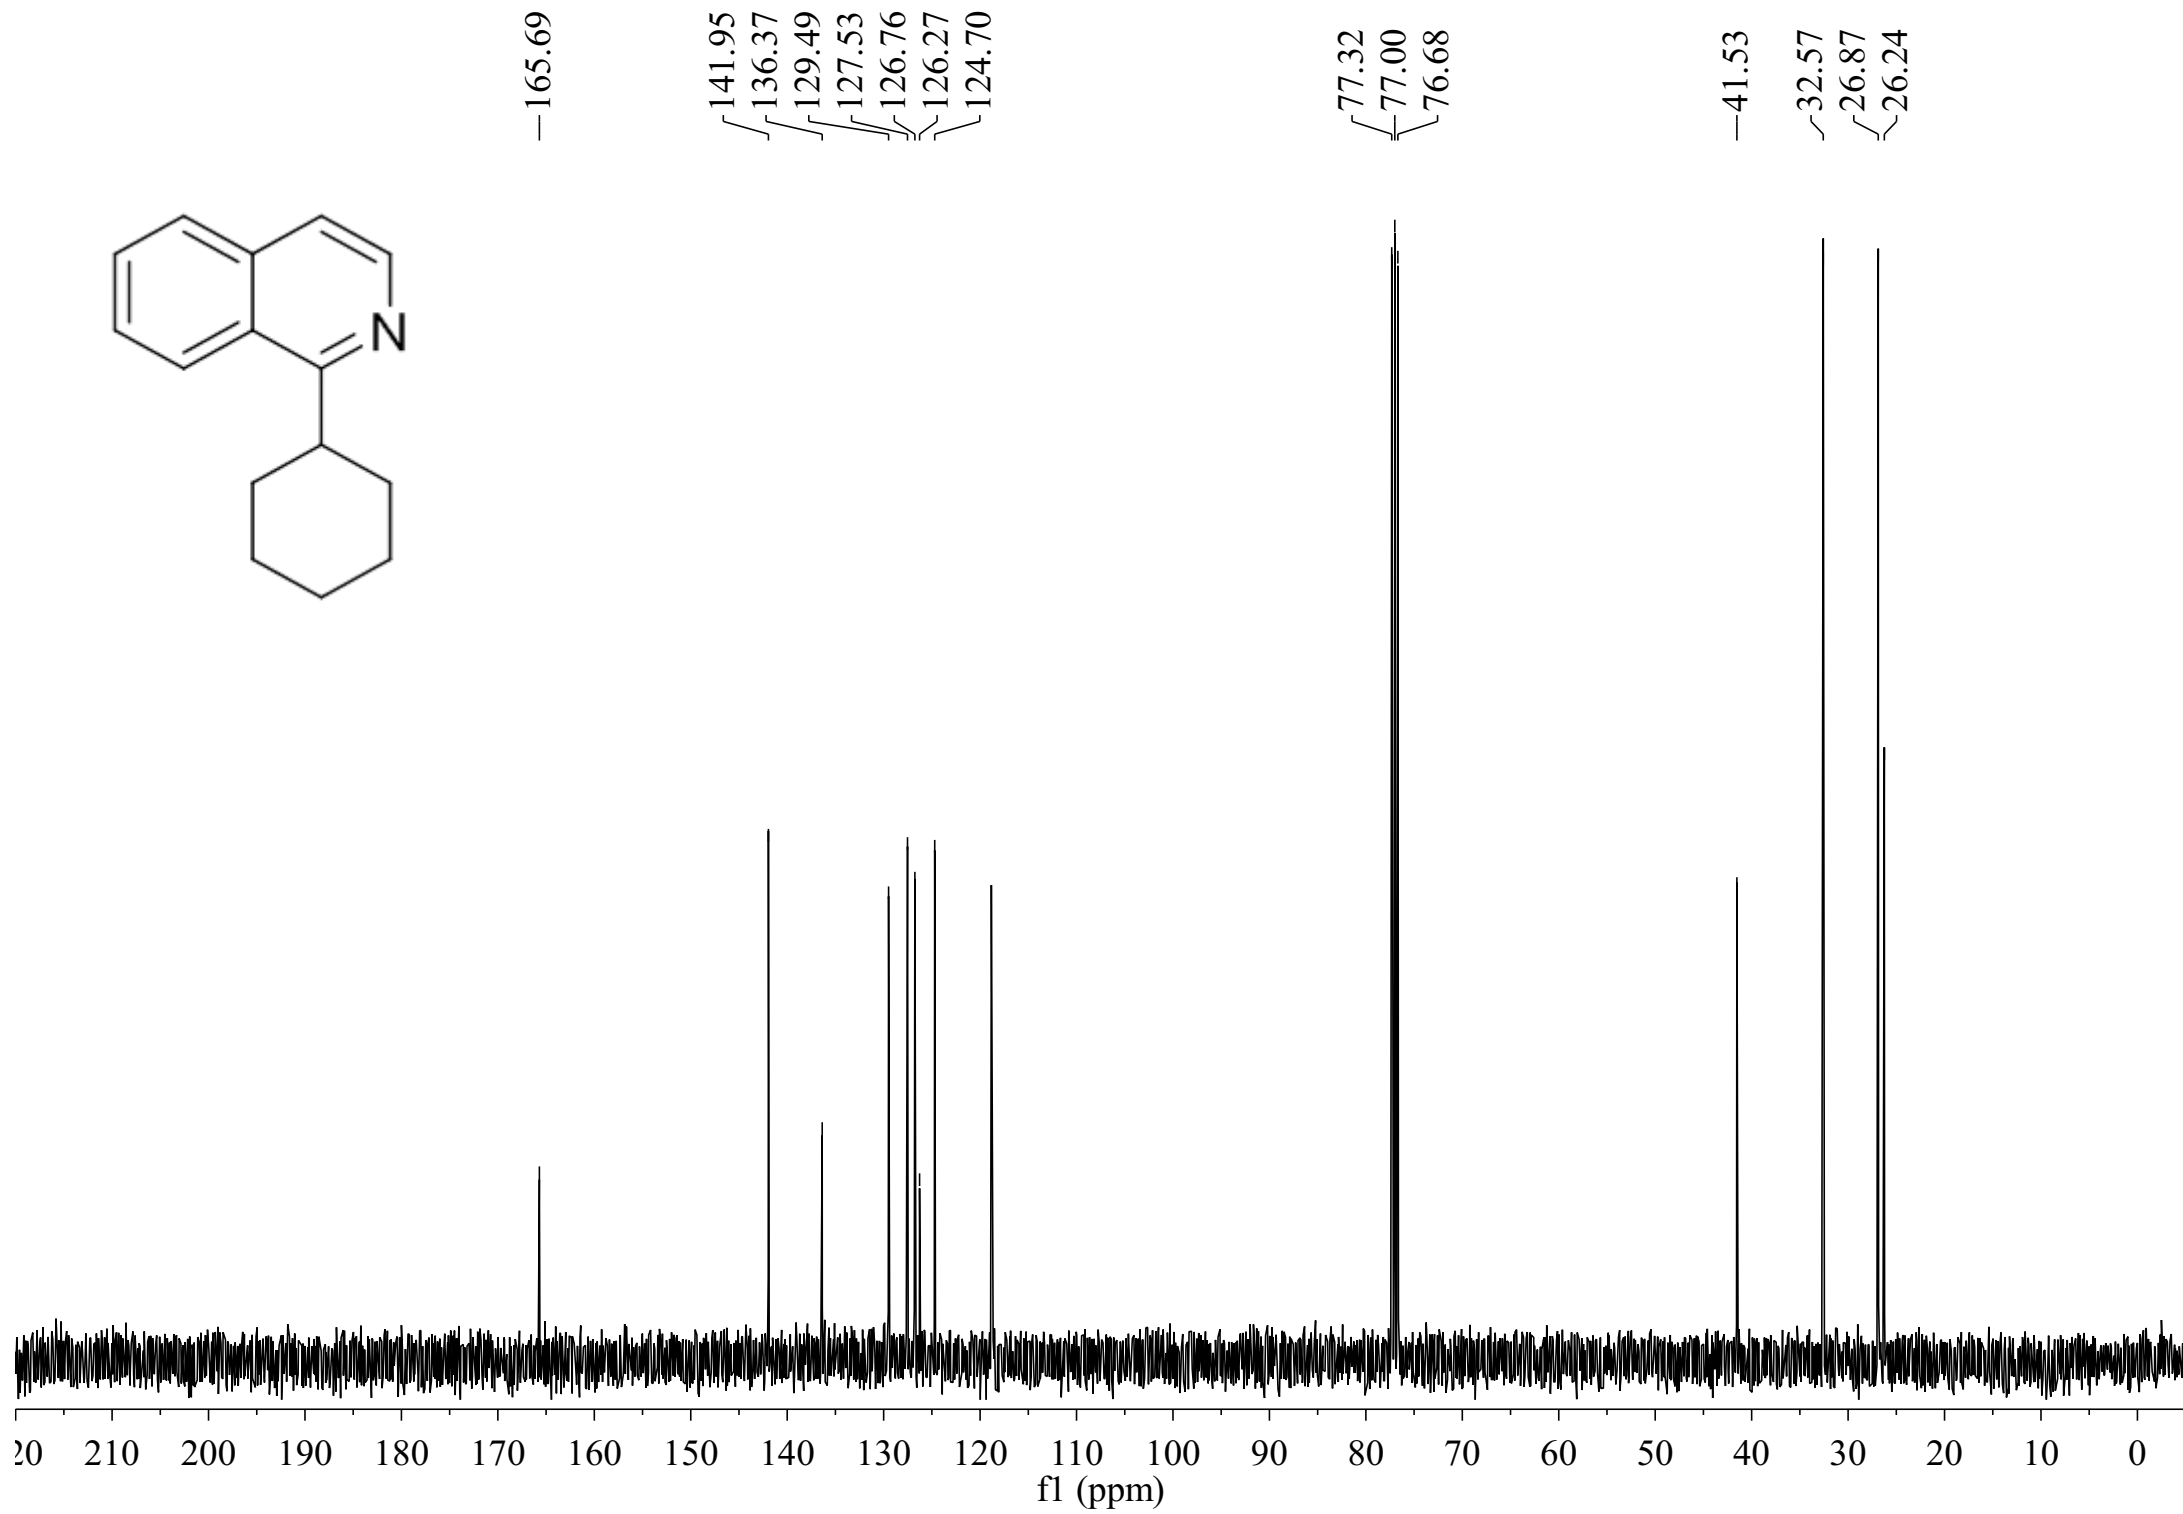

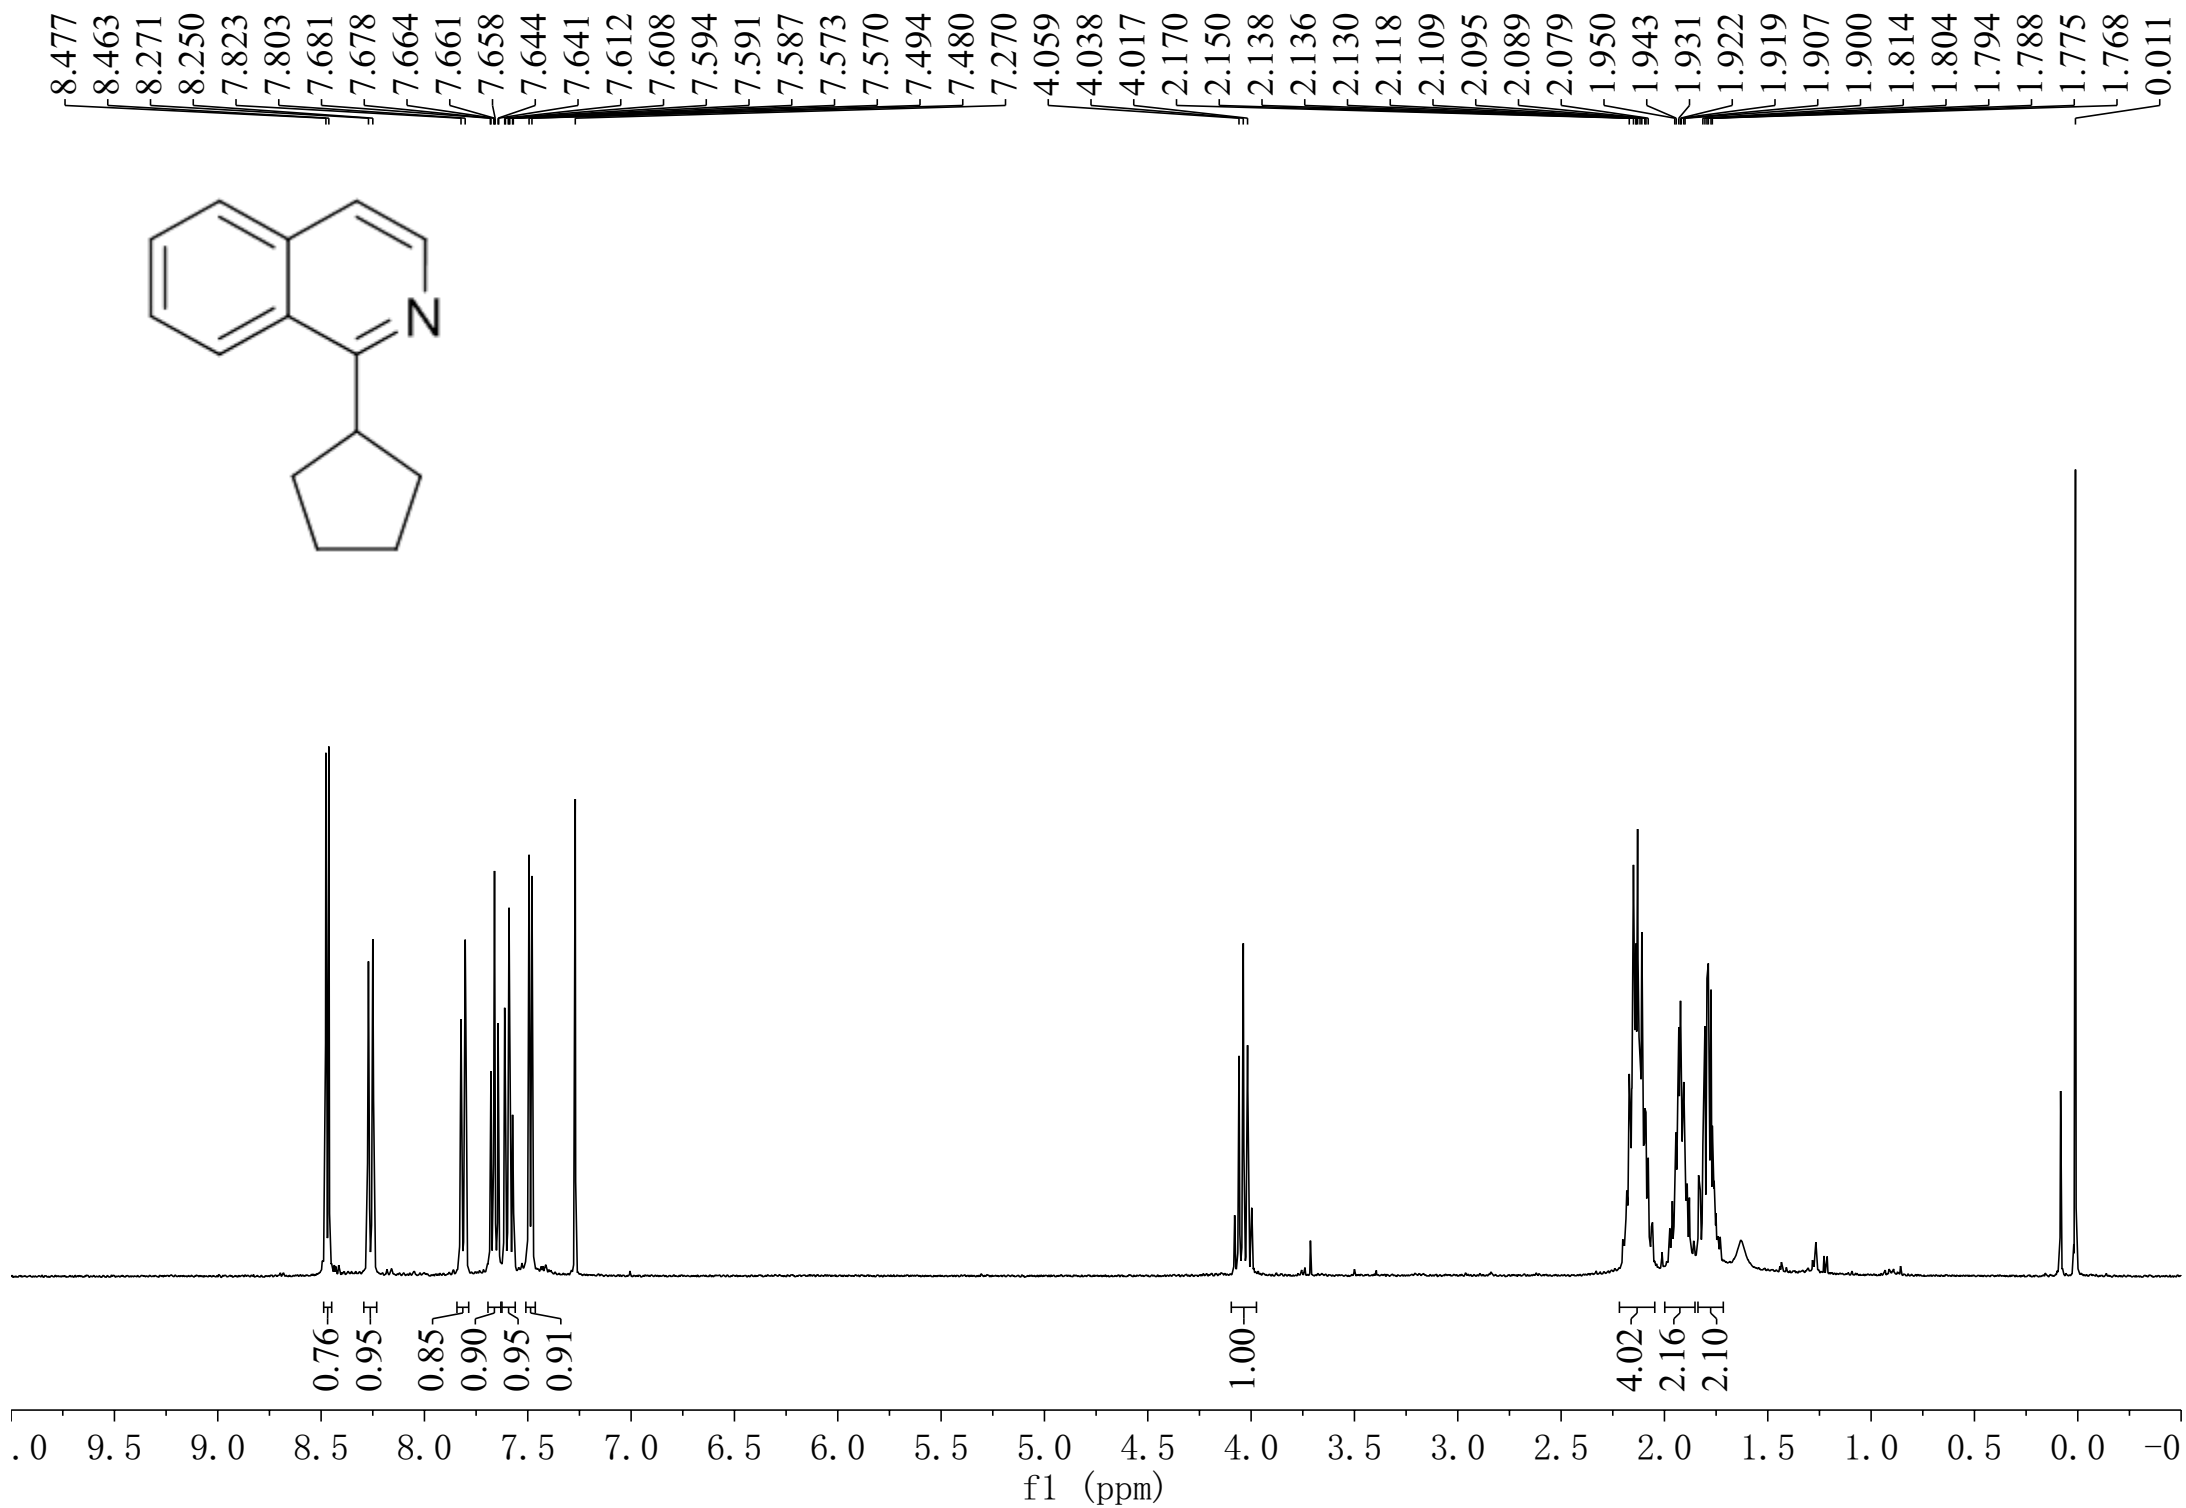



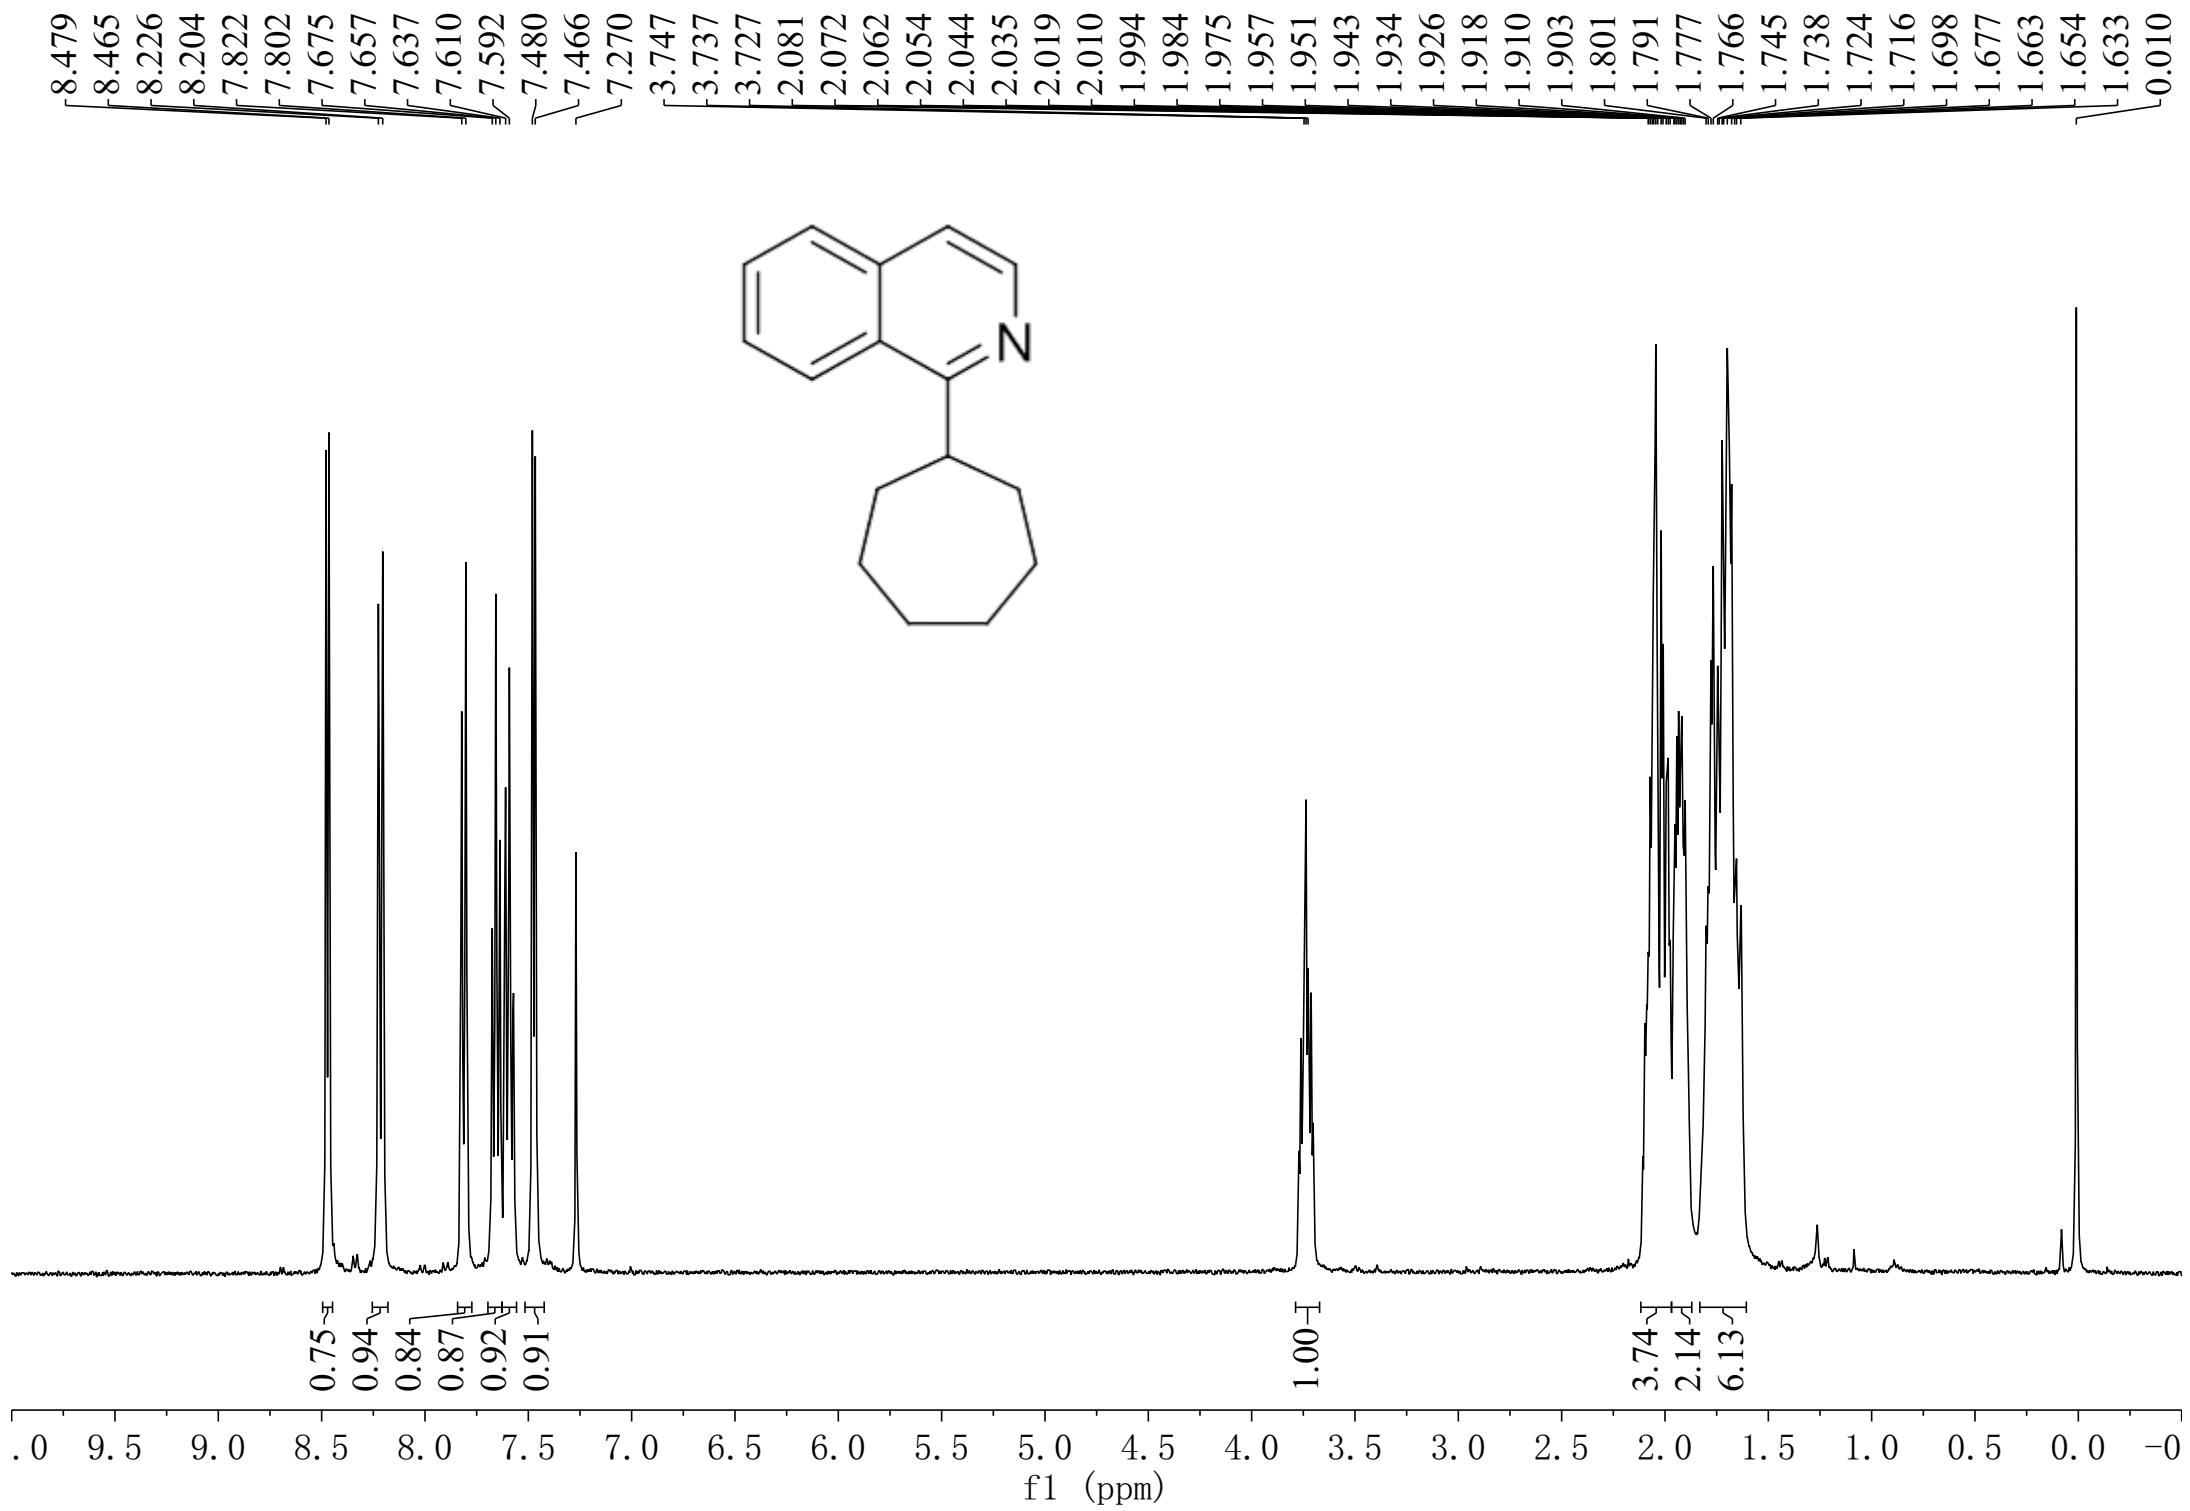

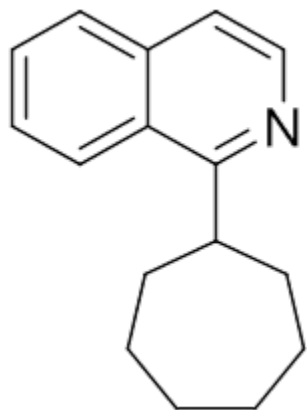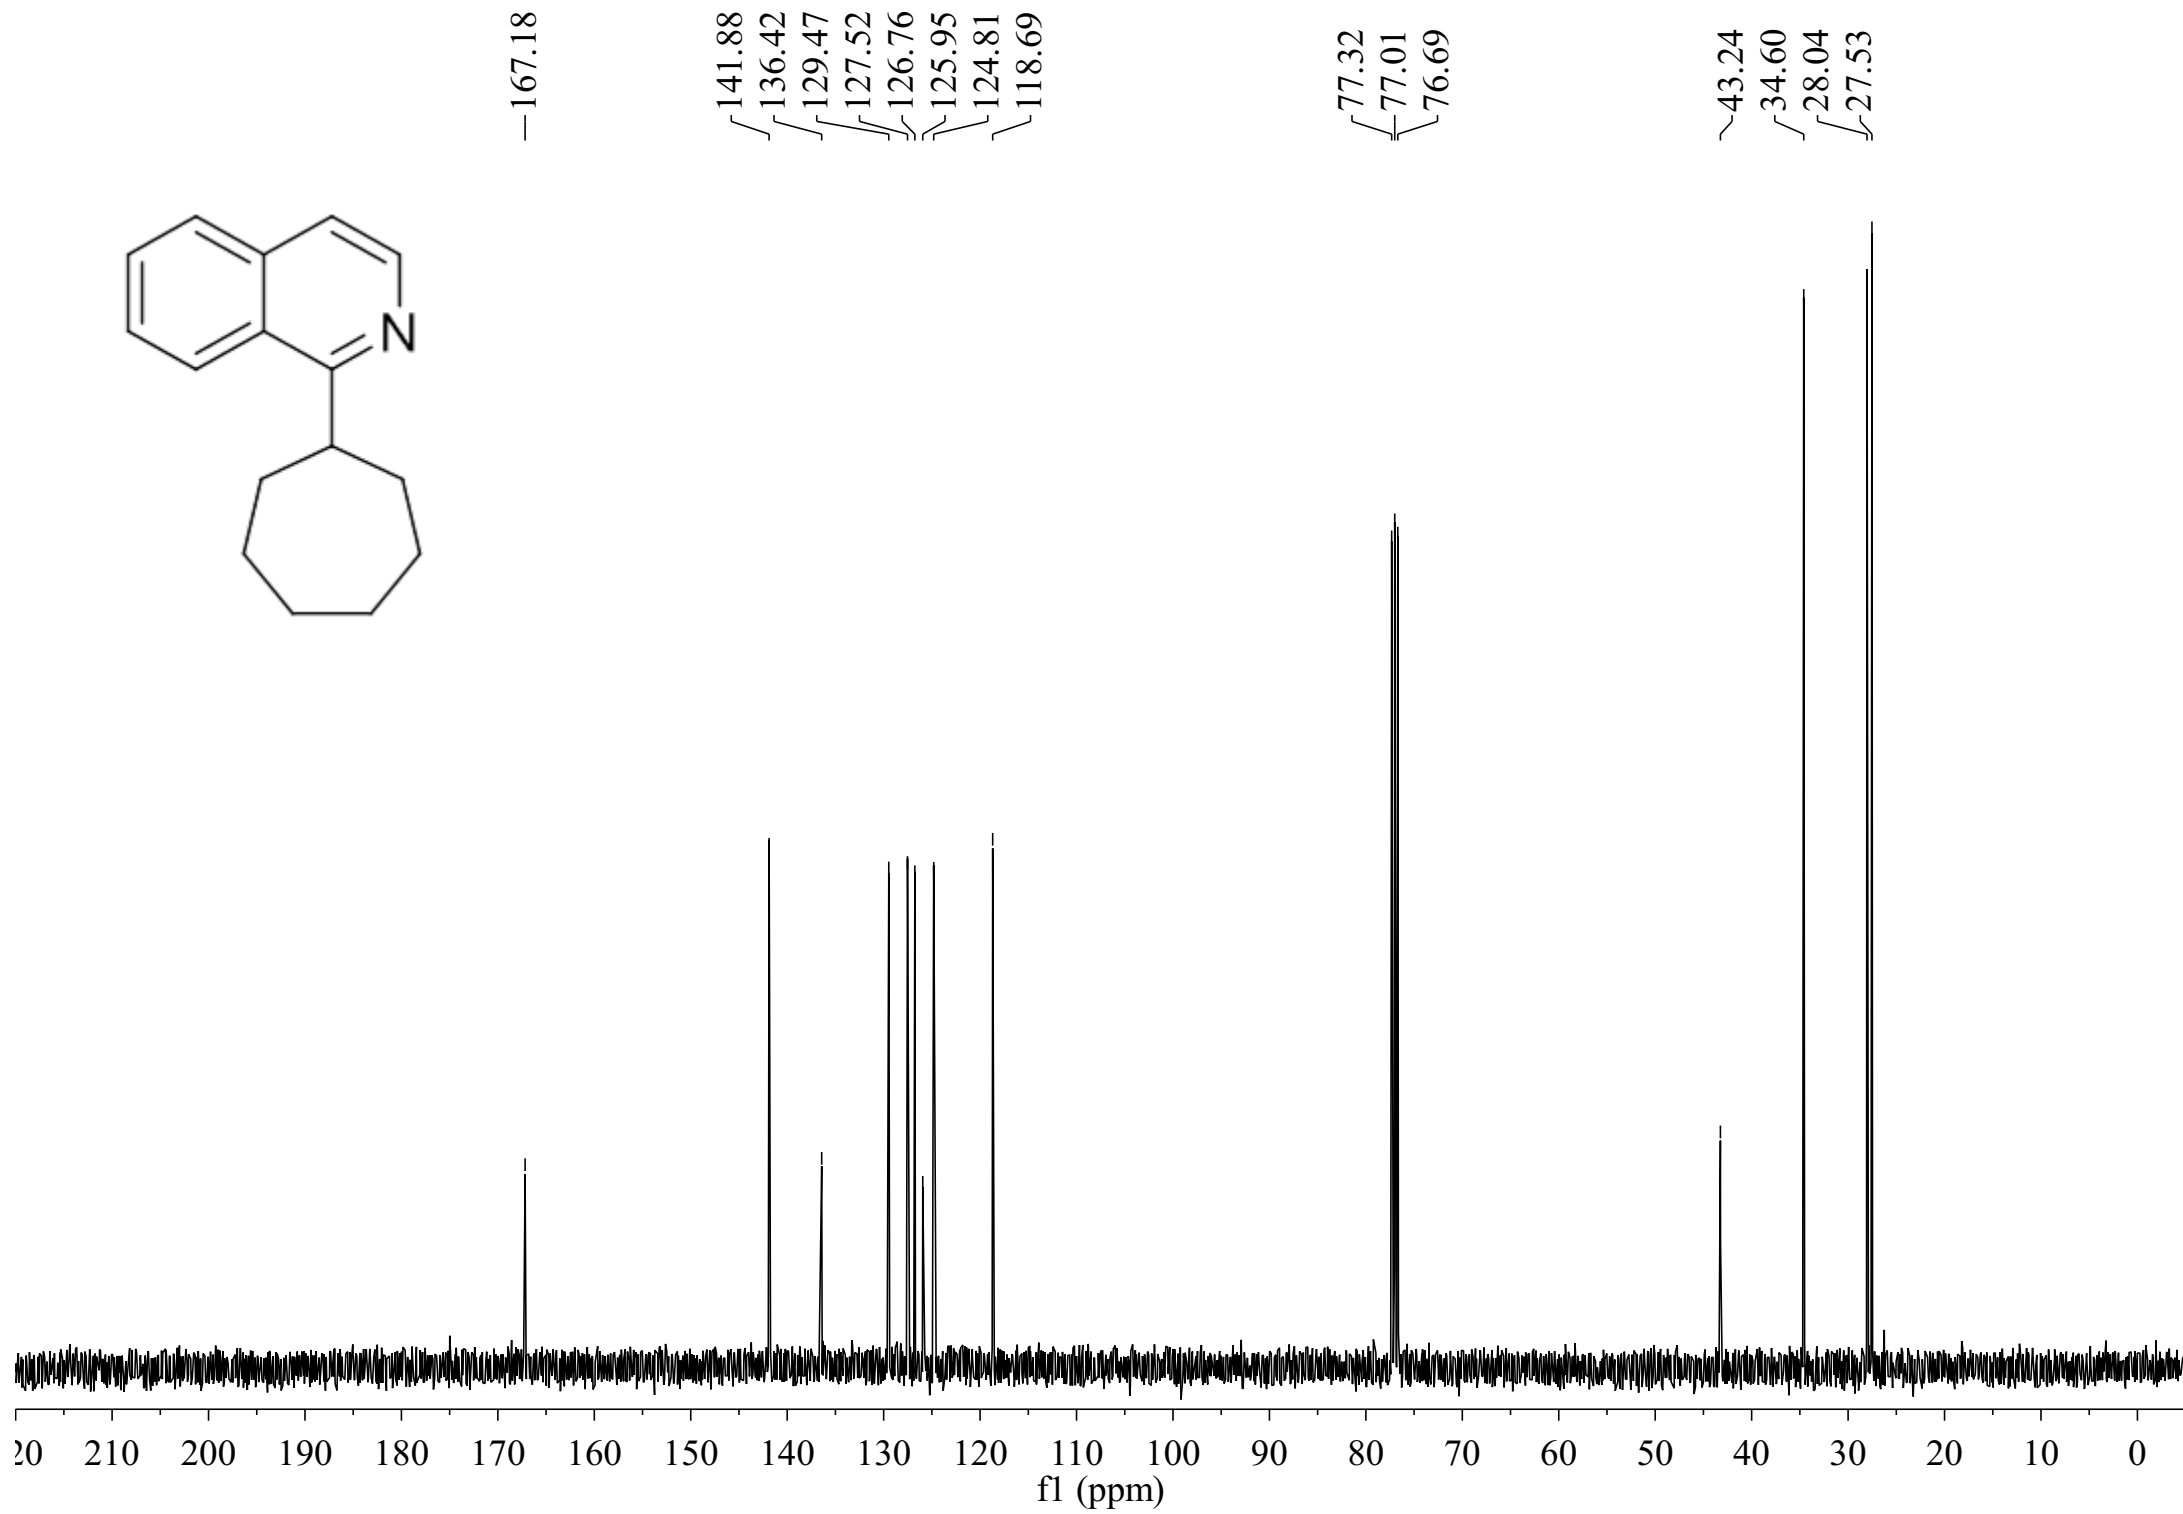

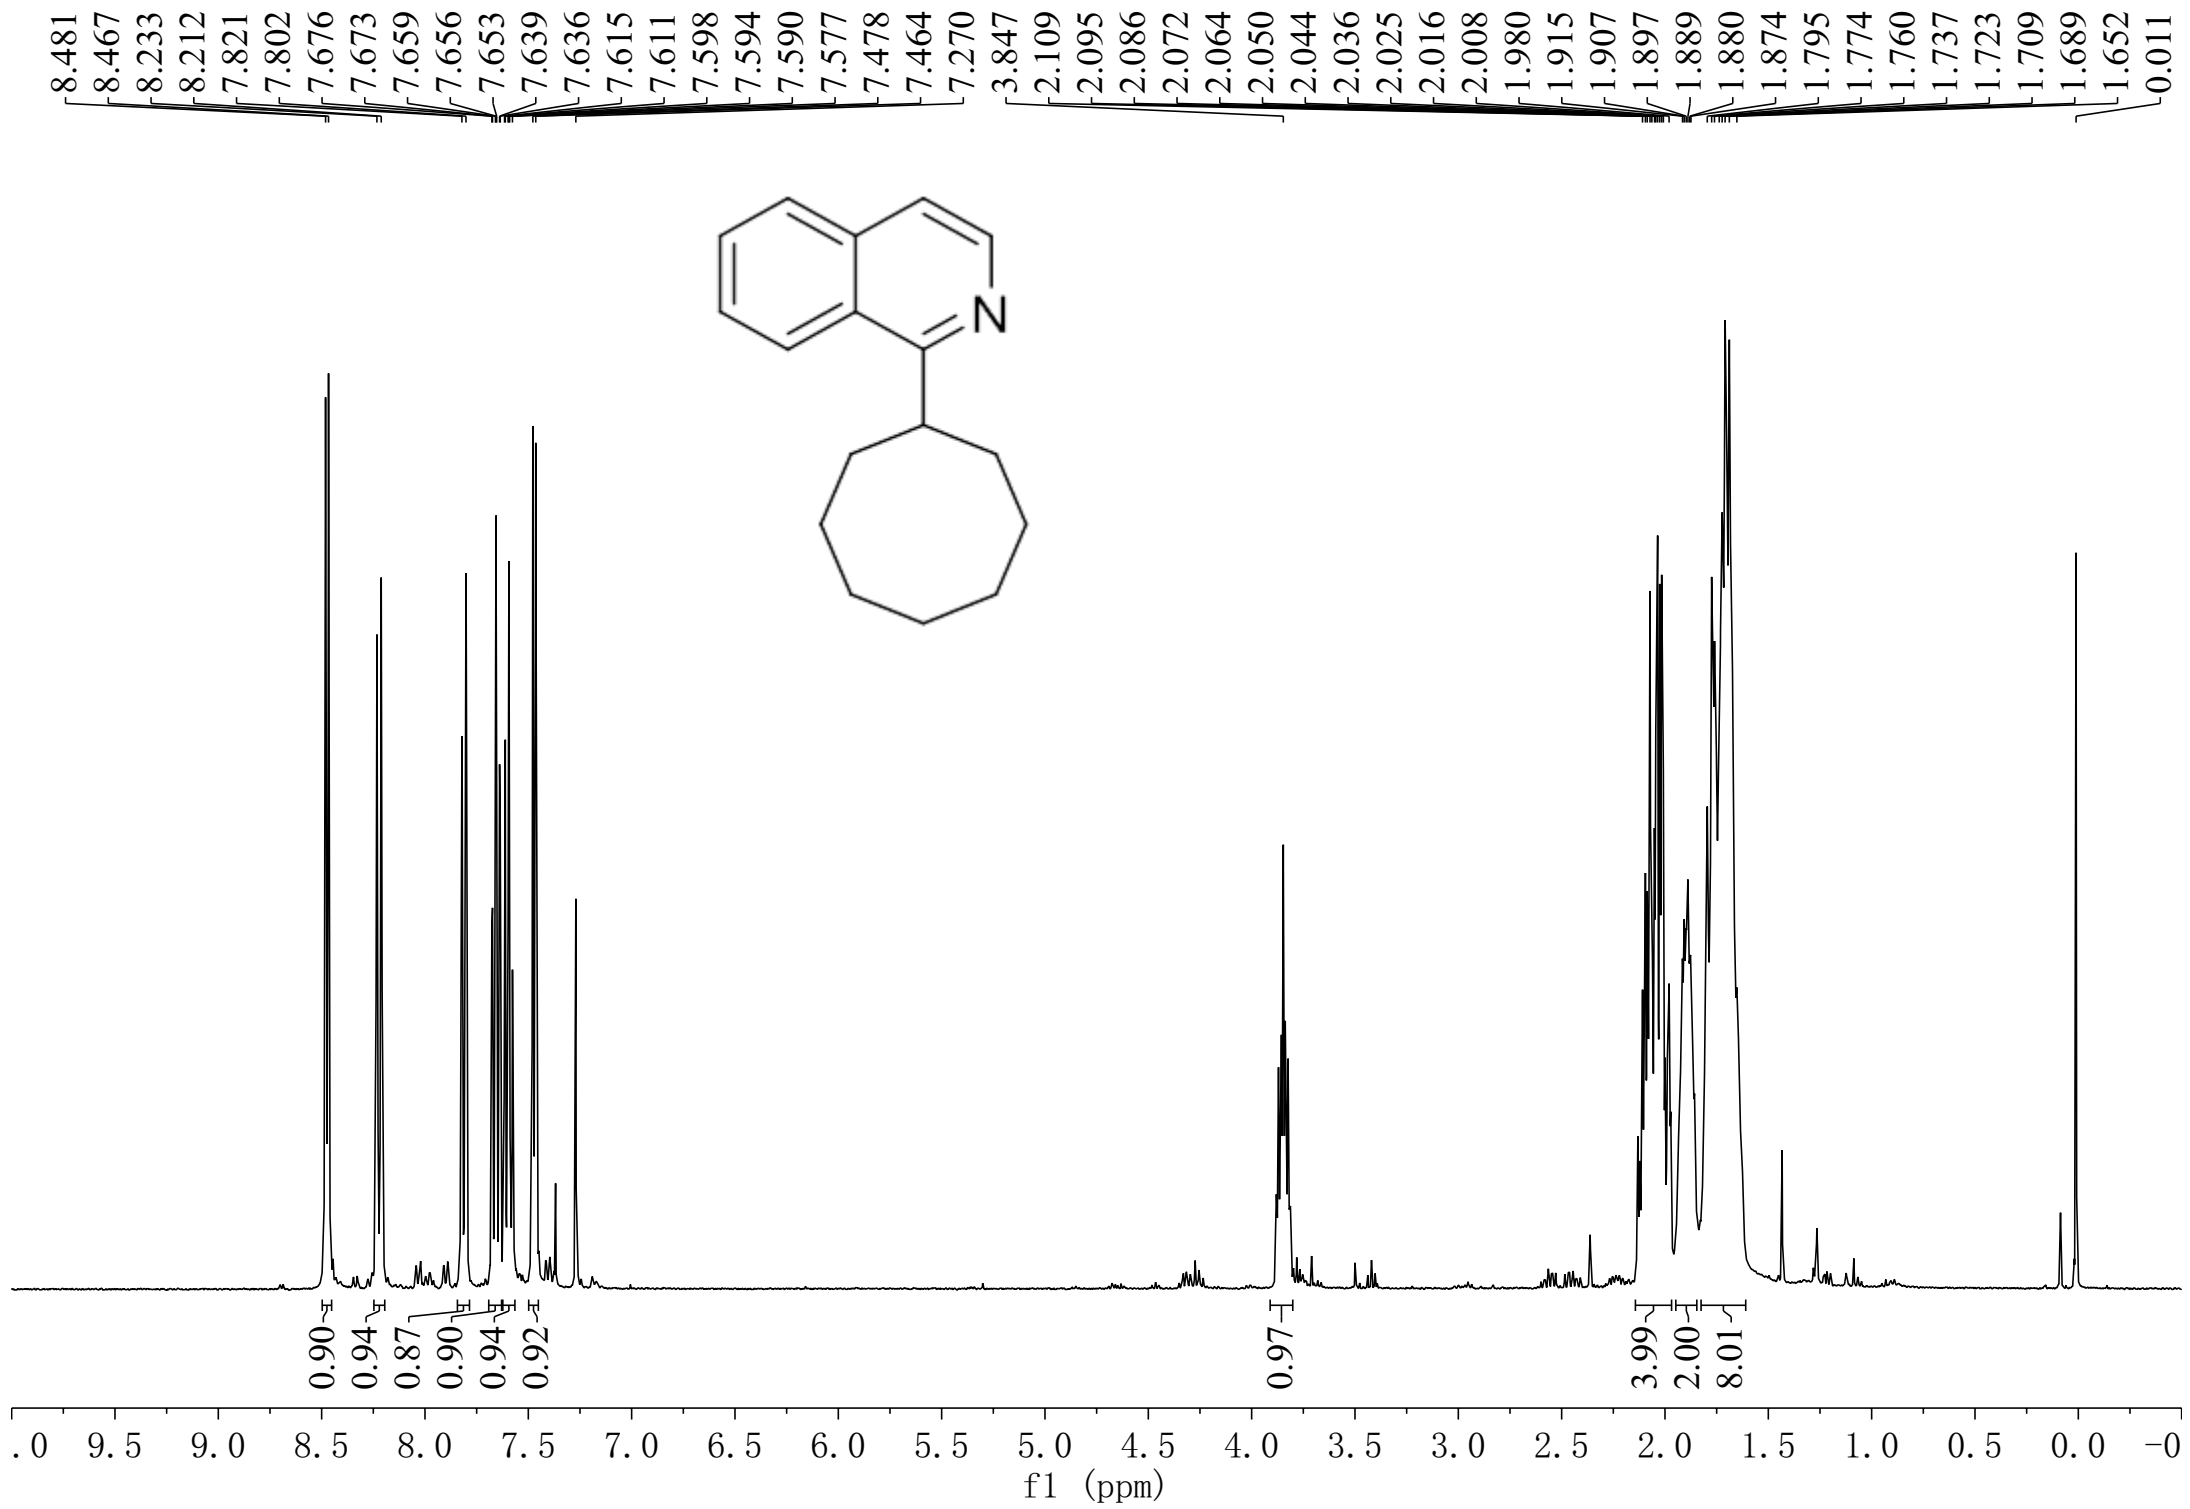



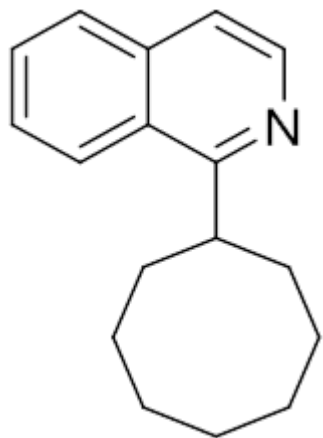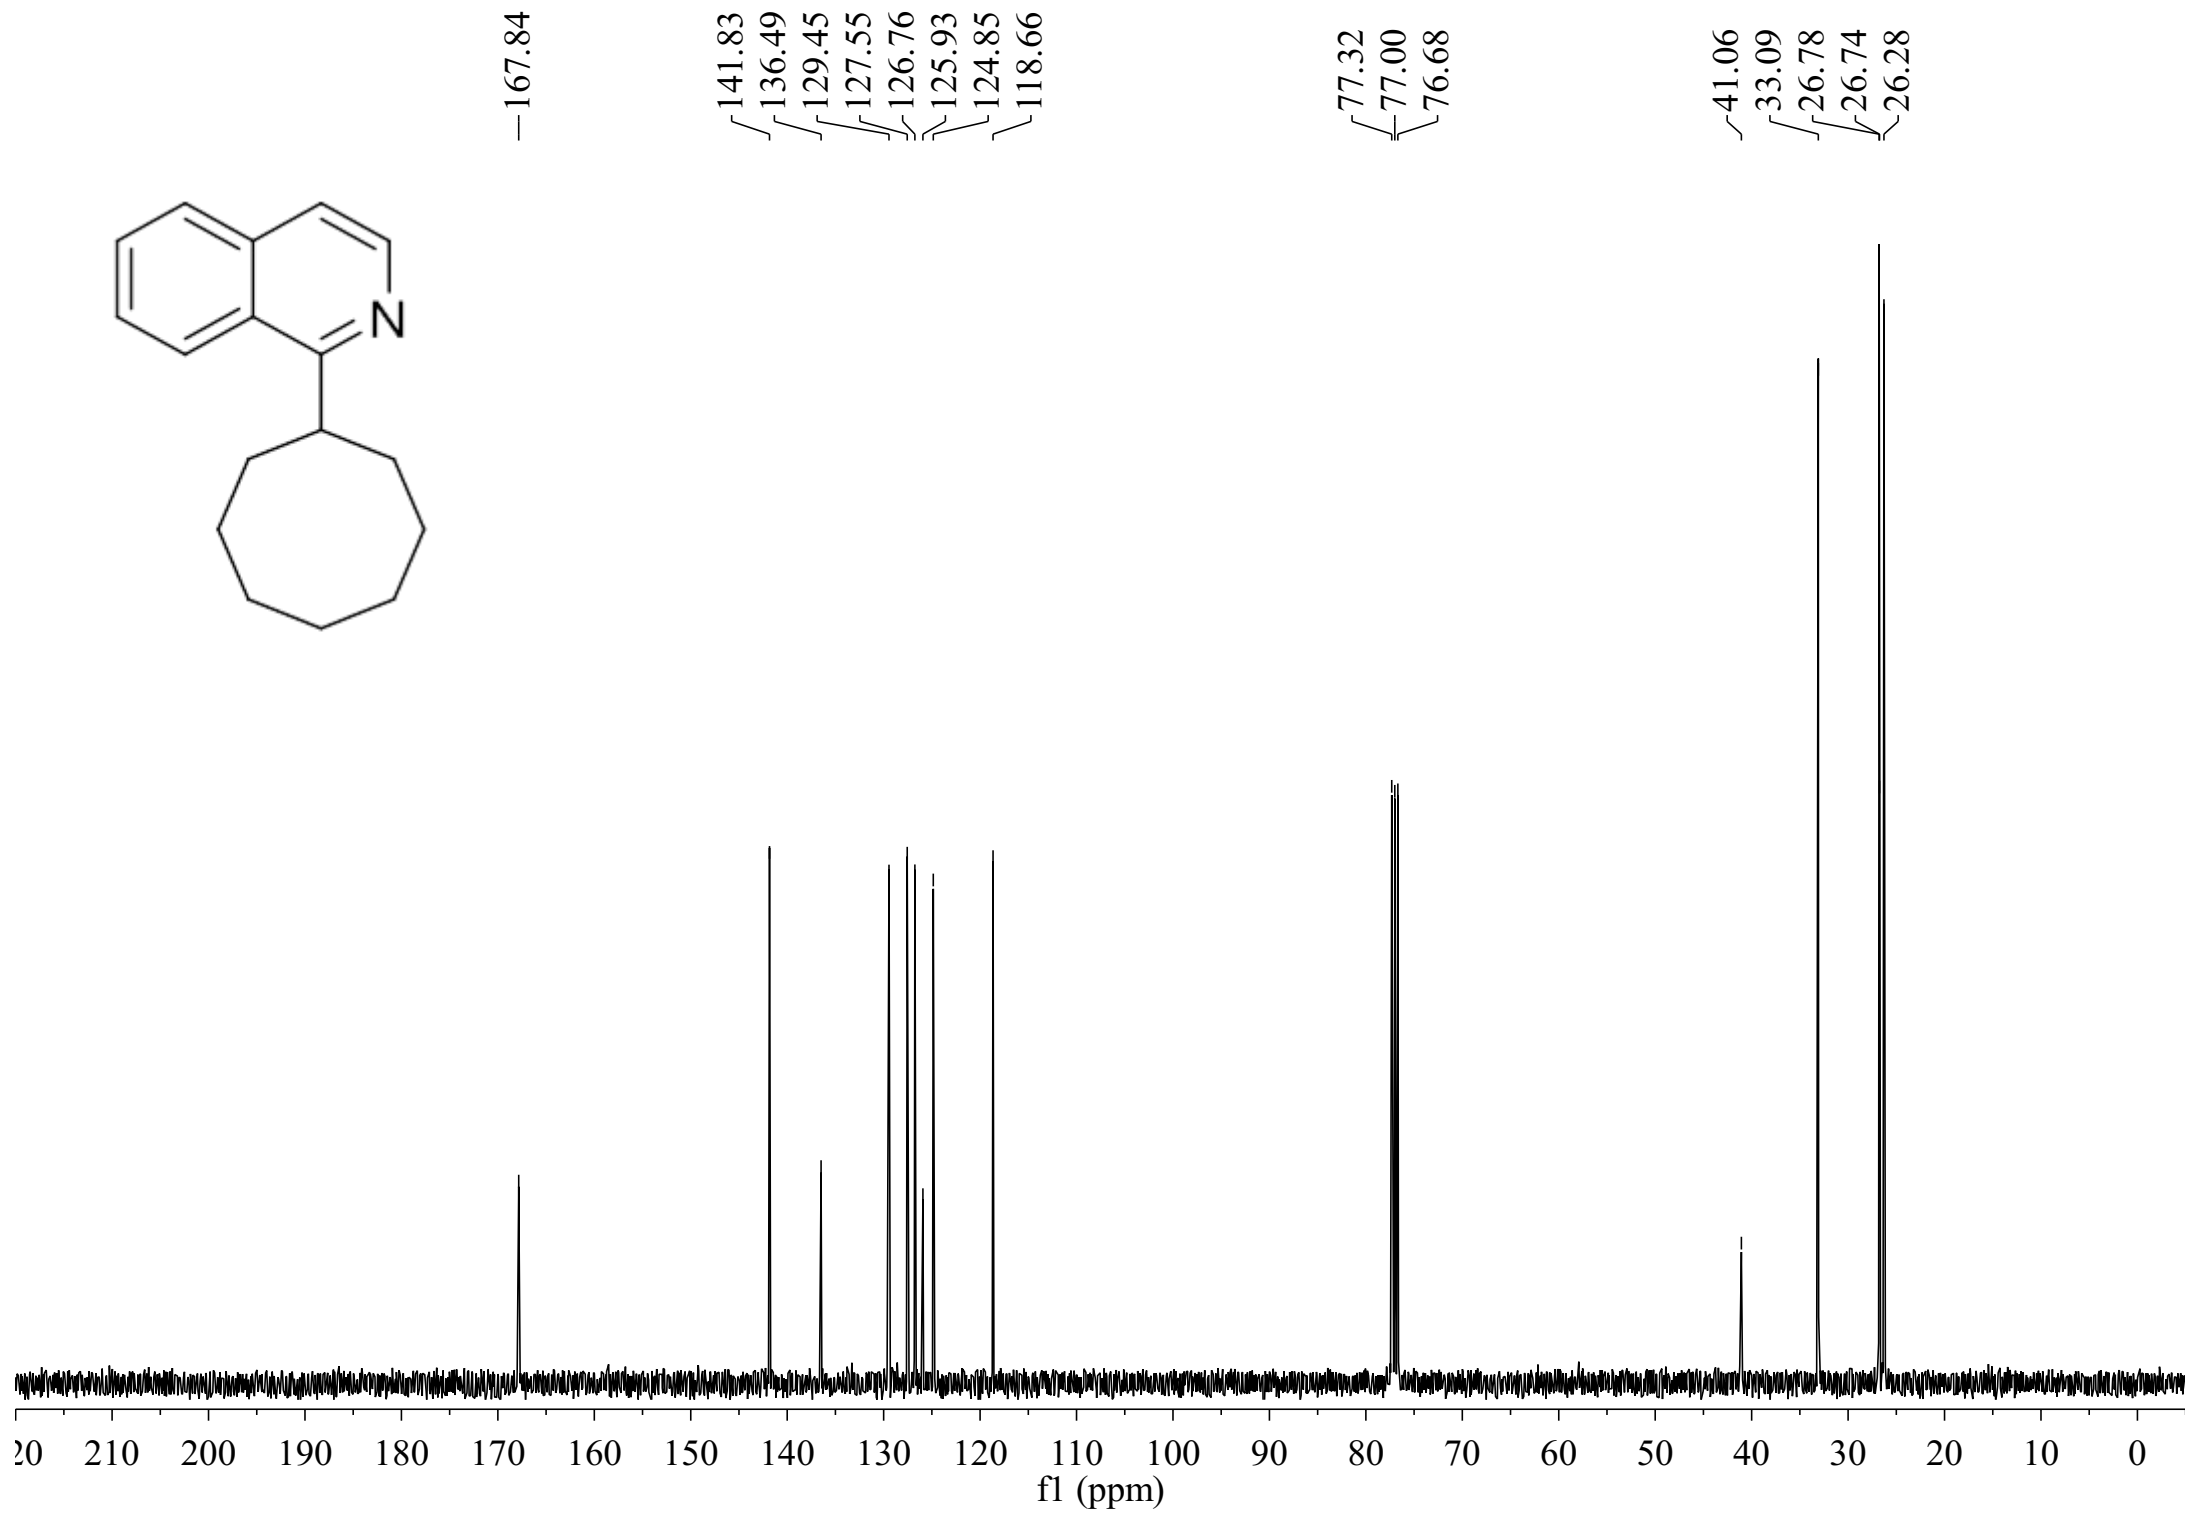

8.450  
8.436  
8.217  
8.196  
7.804  
7.784  
7.666  
7.663  
7.648  
7.645  
7.628  
7.625  
7.603  
7.599  
7.582  
7.578  
7.467  
7.453  
3.606  
3.593  
3.583  
3.571  
2.598  
2.589  
2.440  
2.435  
2.433  
2.429  
2.421  
2.414  
2.410  
2.404  
2.398  
2.392  
2.385  
2.380  
2.374  
1.753  
1.738  
1.731  
1.725  
1.709  
1.703  
1.695  
1.685  
1.680  
1.659  
1.650  
1.574  
1.570  
1.419  
1.414  
1.210  
1.207  
1.204  
1.201  
1.186  
1.183  
1.180

3.606  
3.593  
3.583  
3.571

2.598  
2.589  
2.440  
2.435  
2.433  
2.429  
2.421  
2.414  
2.410  
2.404  
2.398  
2.392  
2.385  
2.380  
2.374

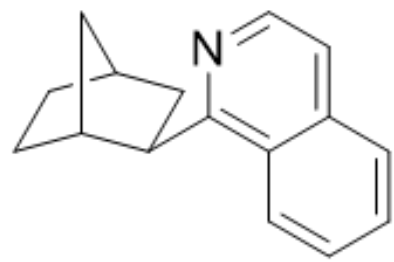

3.7  
3.6  
3.5  
3.4  
3.3  
3.2  
3.1  
3.0  
2.9  
2.8  
2.7  
2.6  
2.5  
2.4  
f1 (ppm)

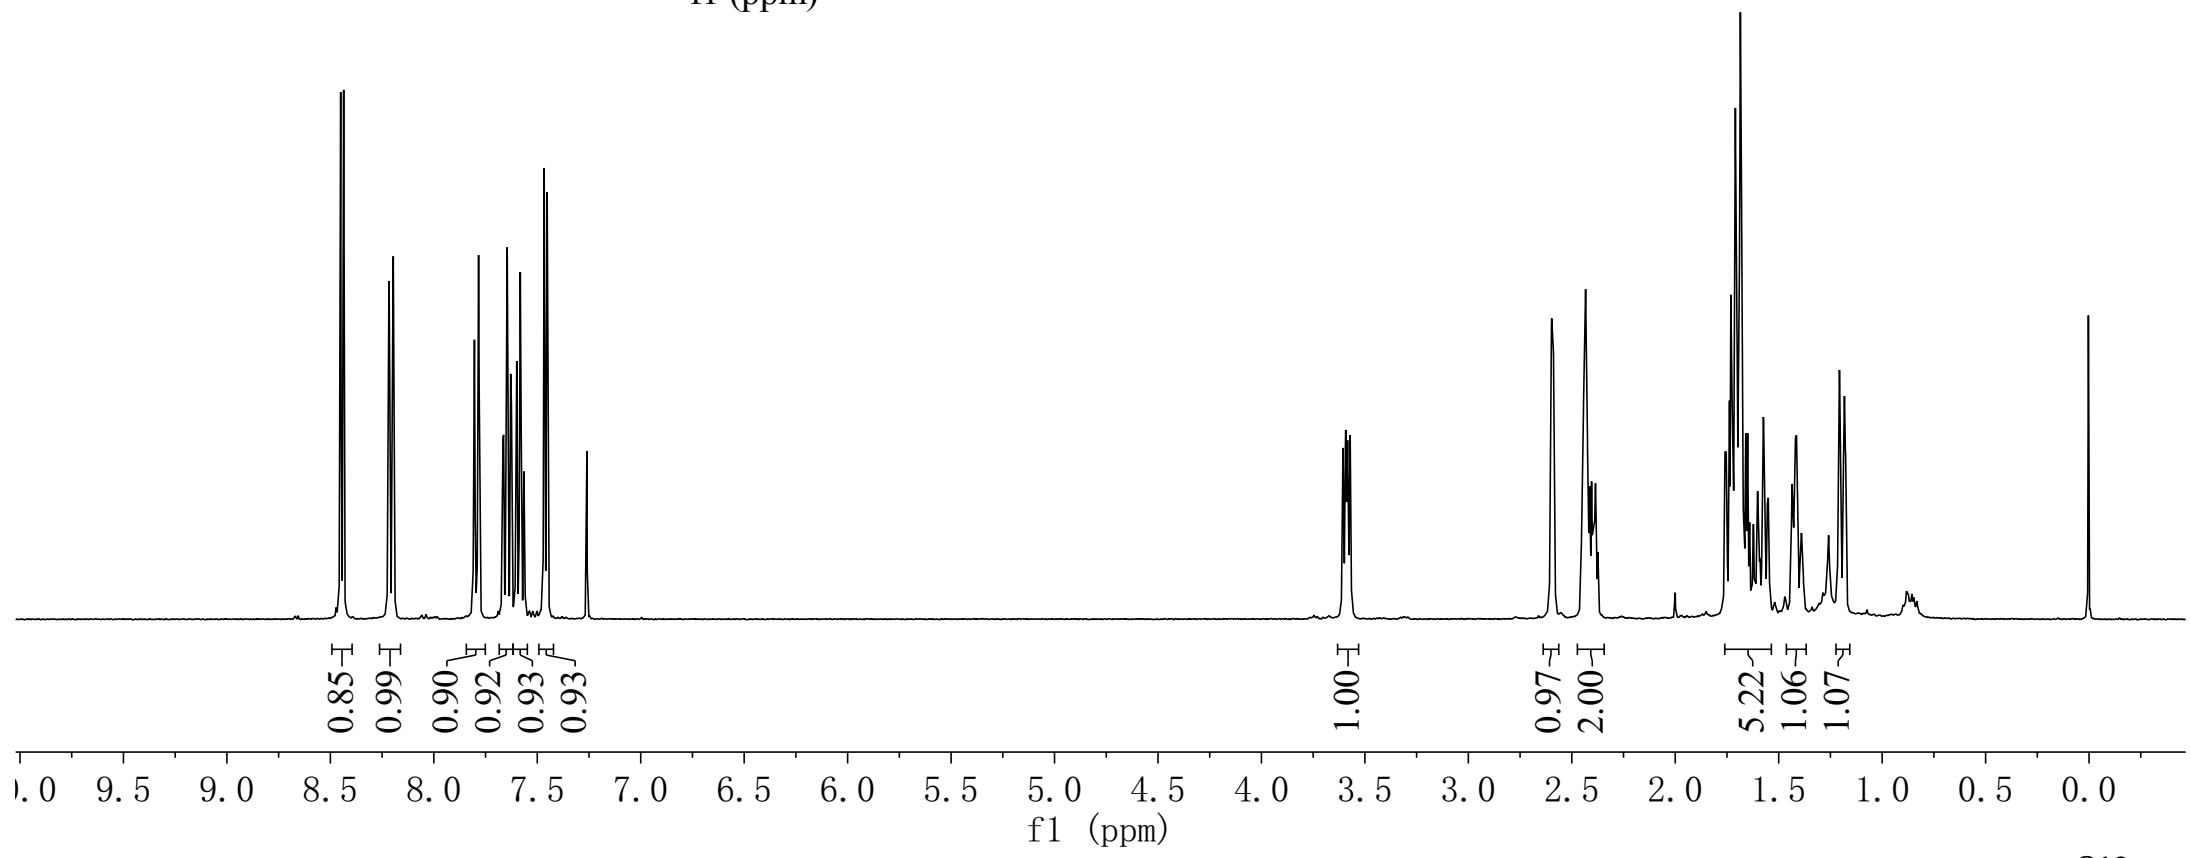

0.85  
0.99  
0.90  
0.92  
0.93  
0.93

1.00

0.97  
2.00

5.22  
1.06  
1.07

f1 (ppm)

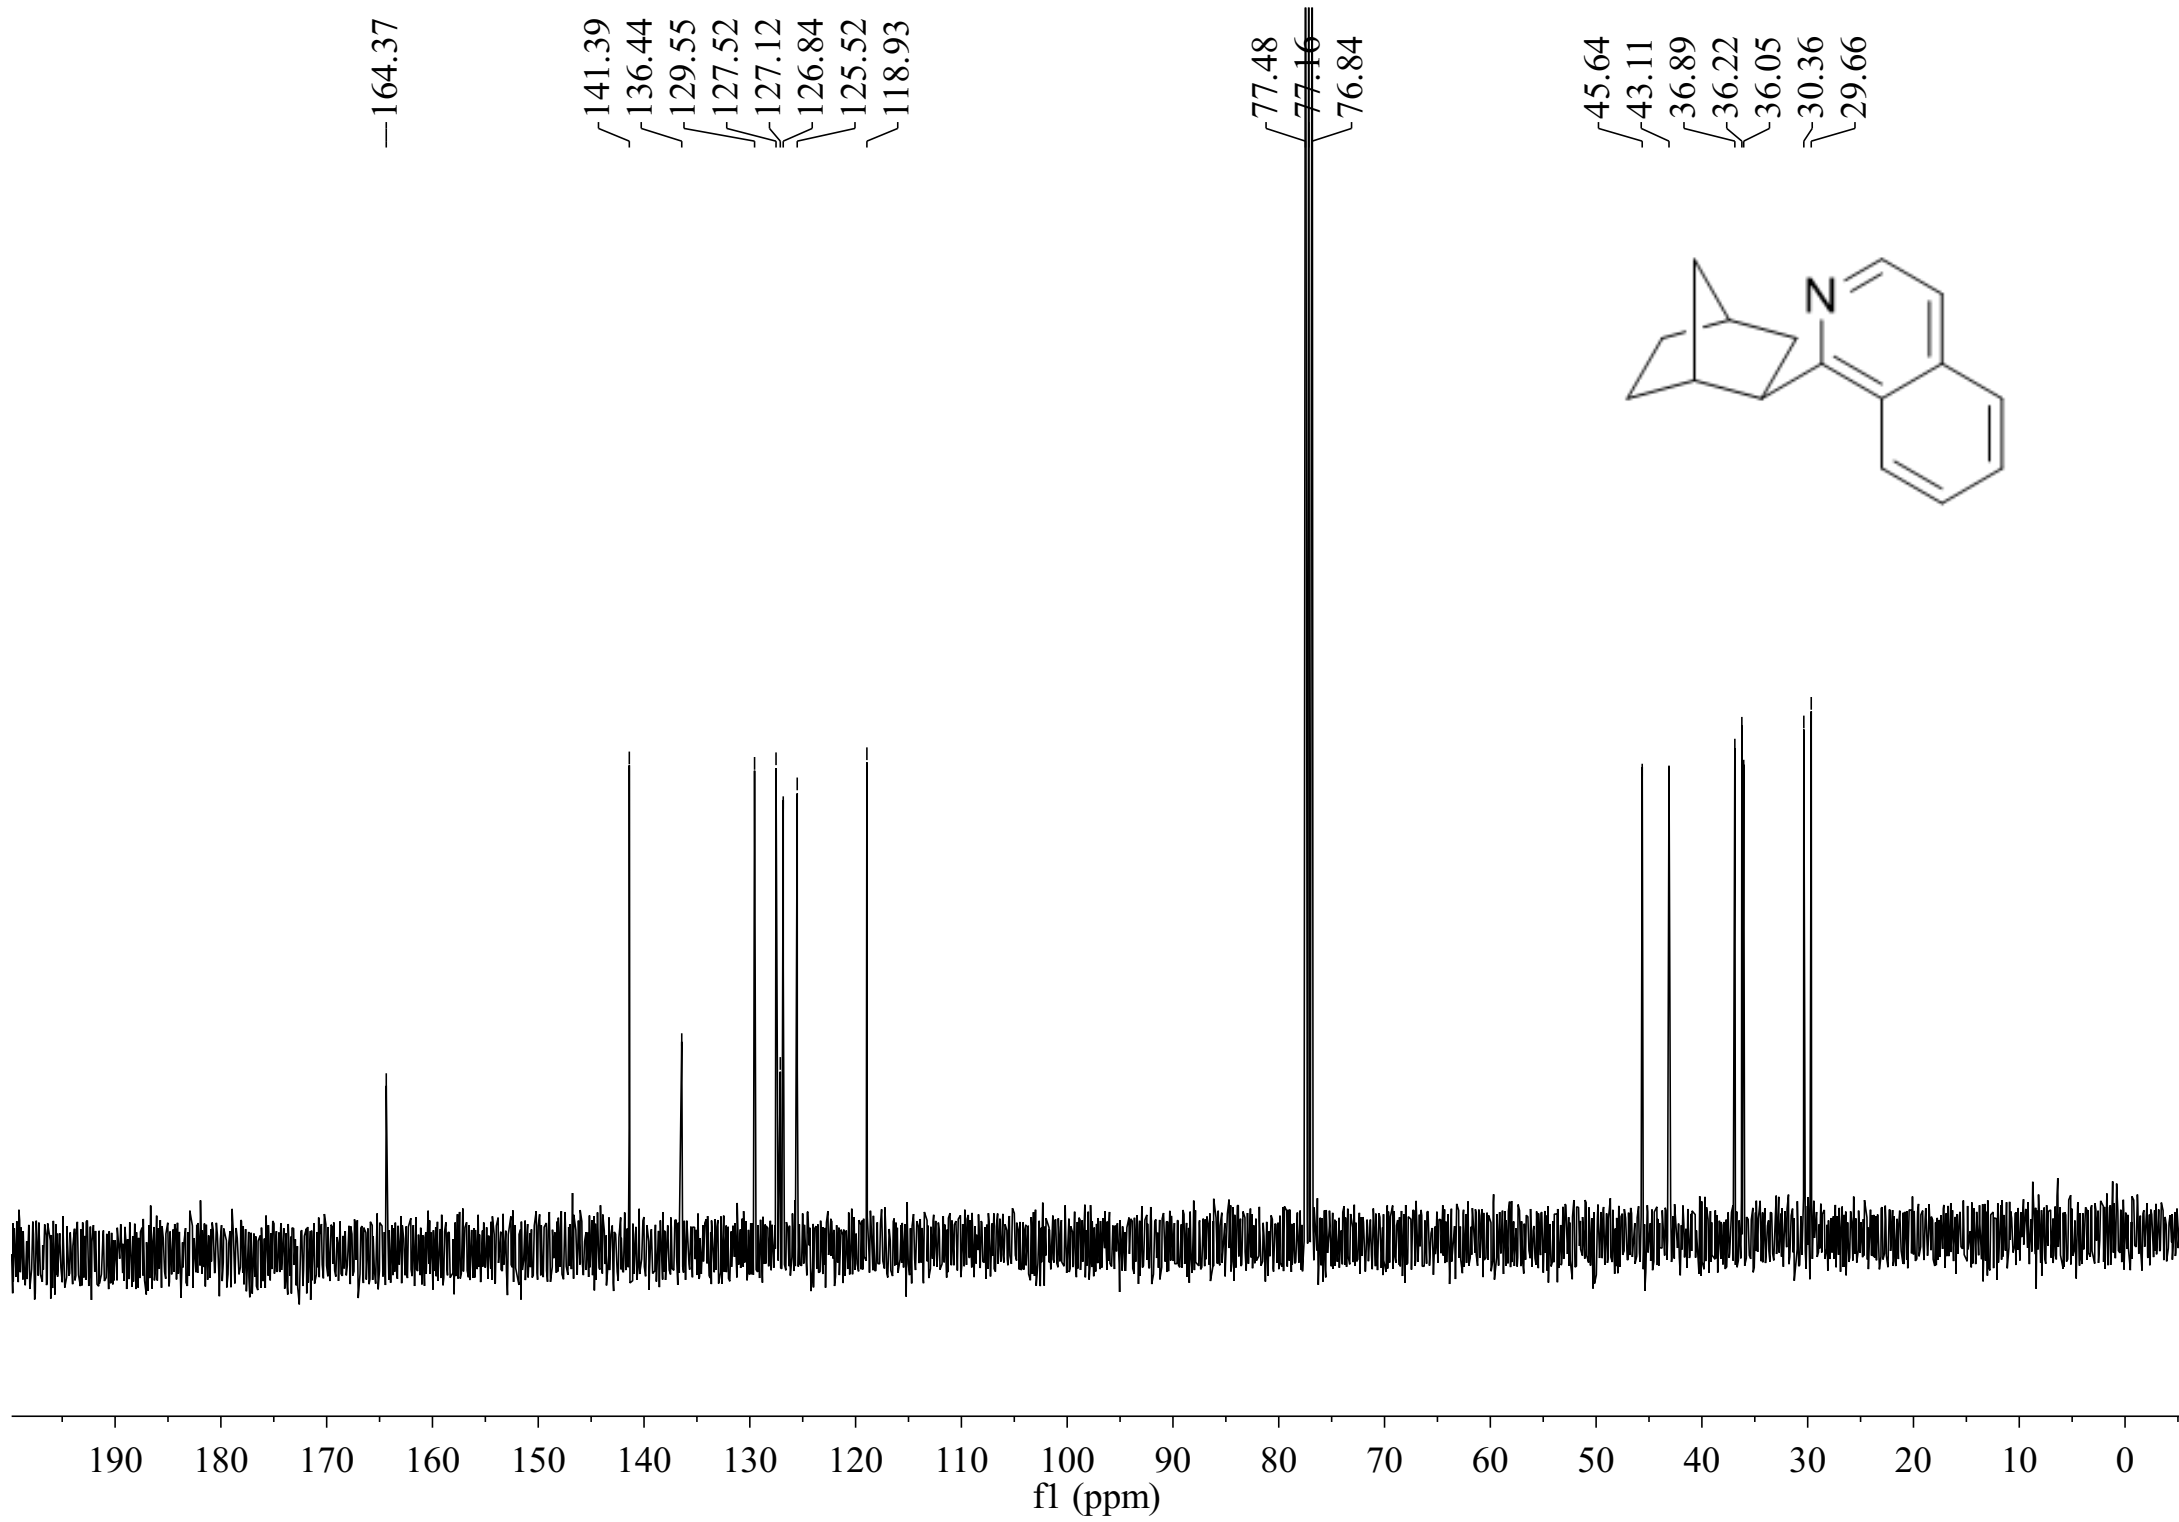

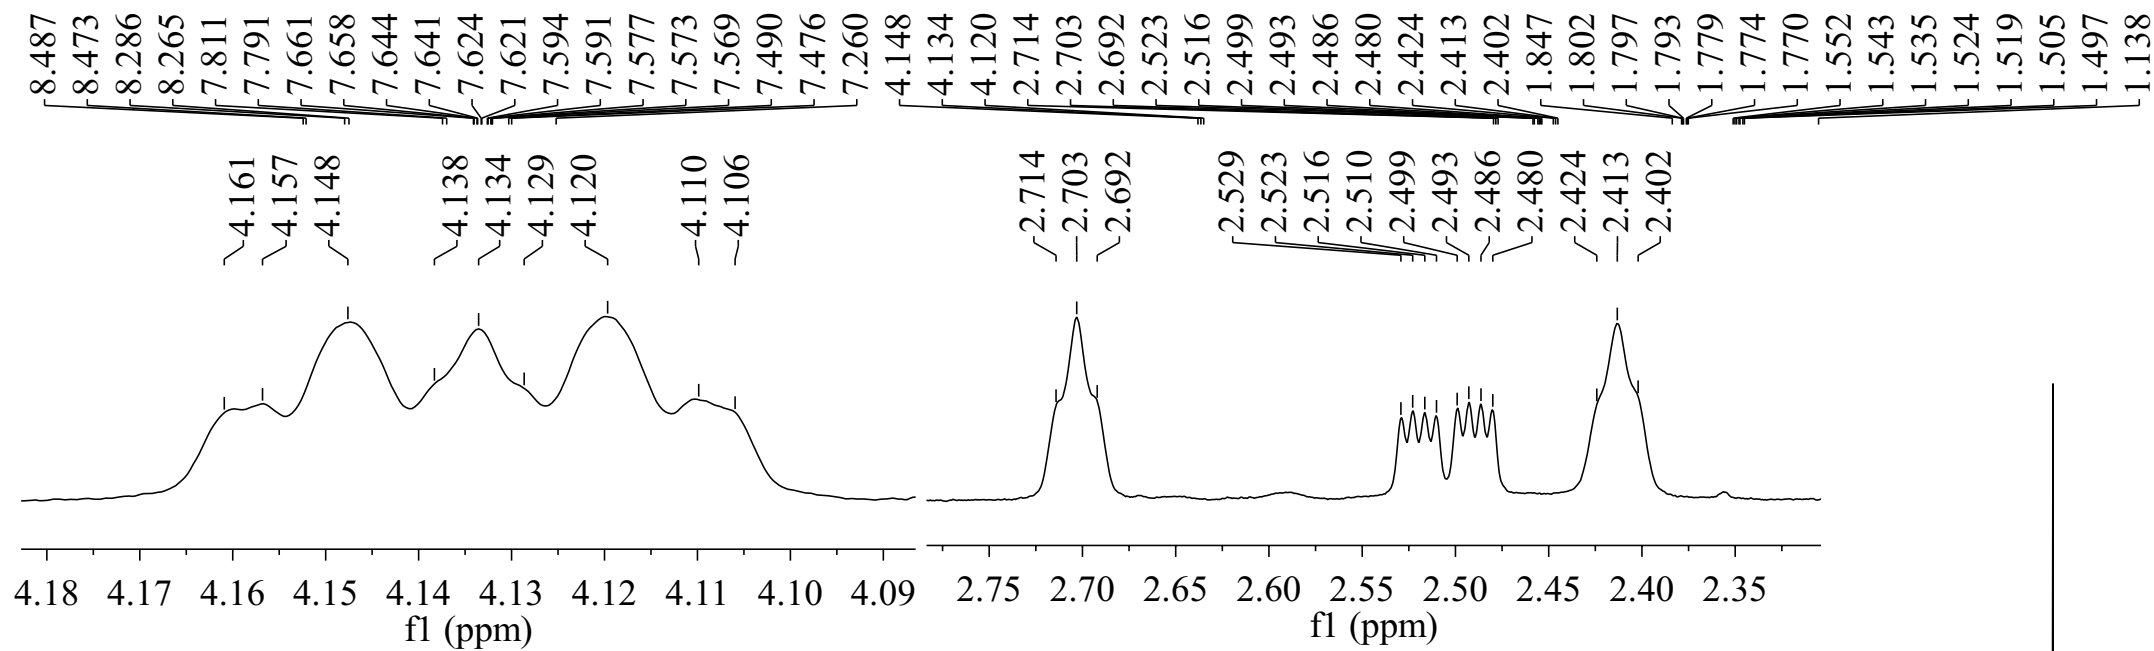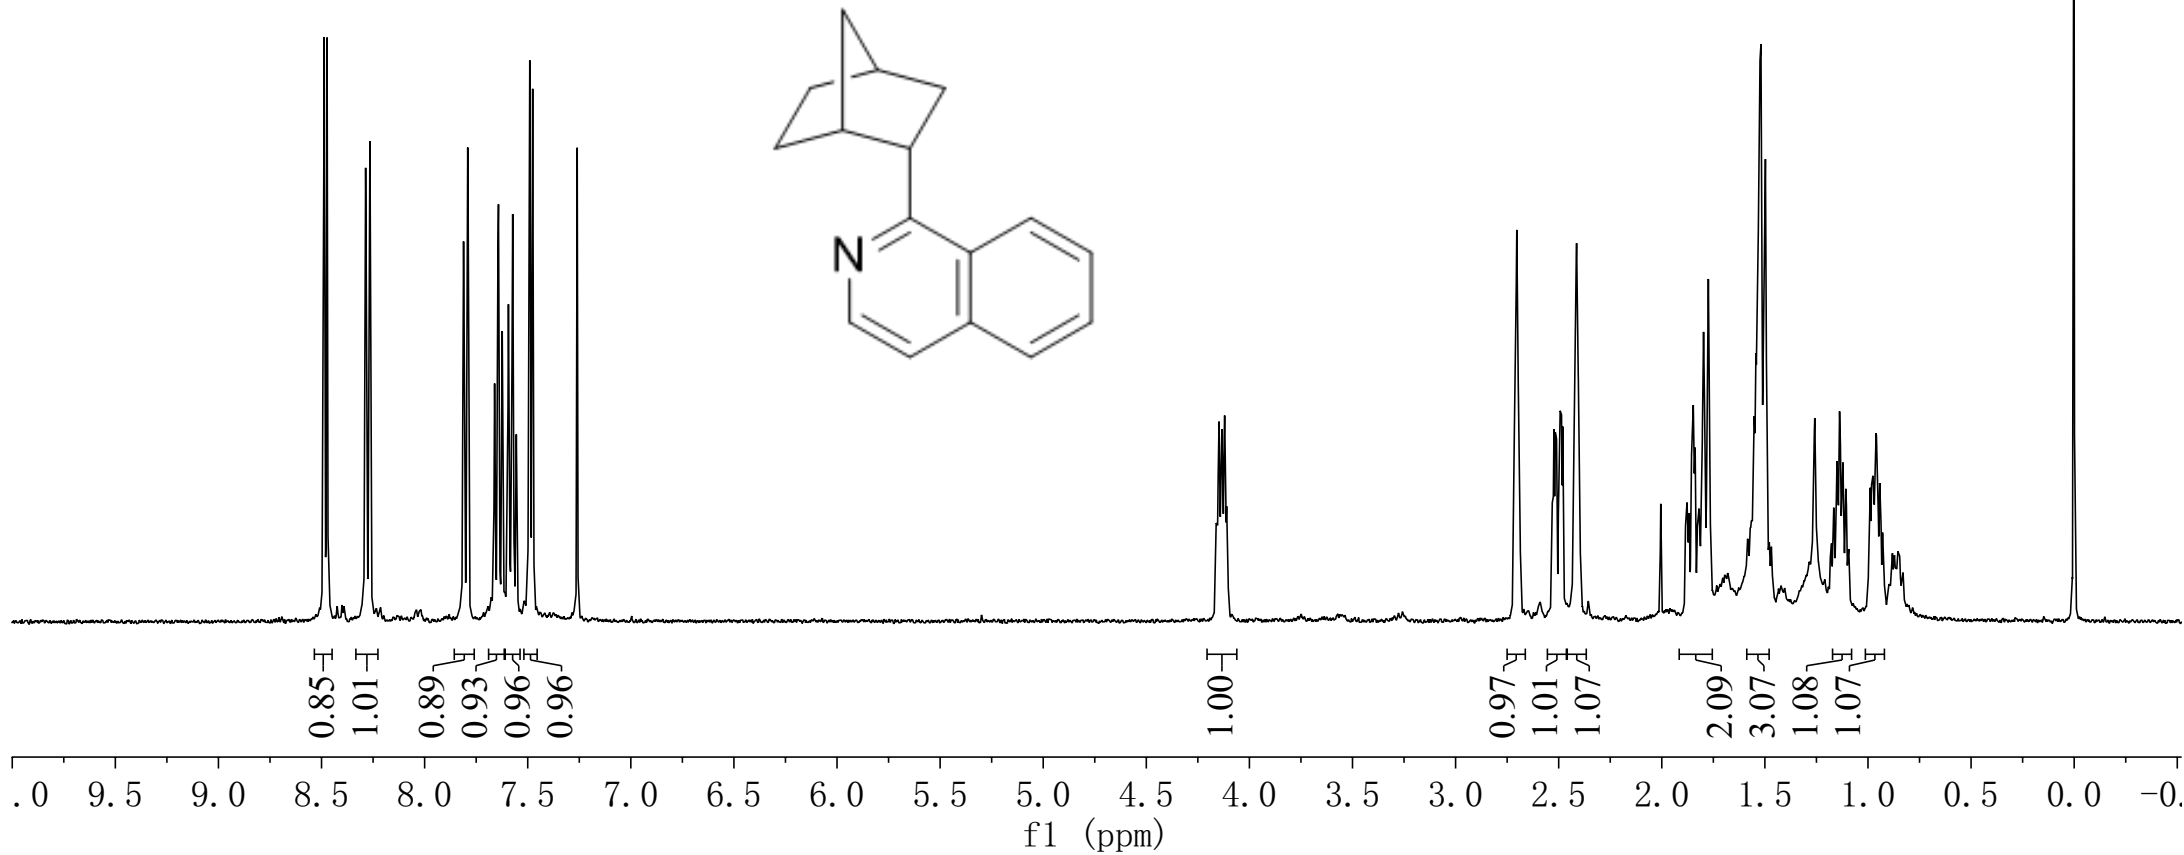

162.20  
141.47  
136.30  
129.51  
128.09  
127.54  
126.75  
125.55  
119.11

77.48  
77.16  
76.84

44.96  
43.64  
41.76  
37.90  
31.86  
29.53  
23.84

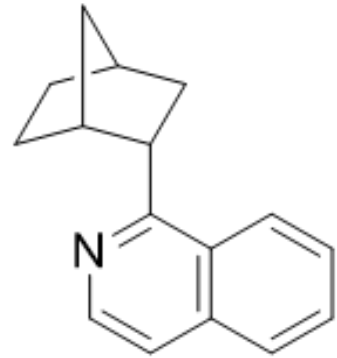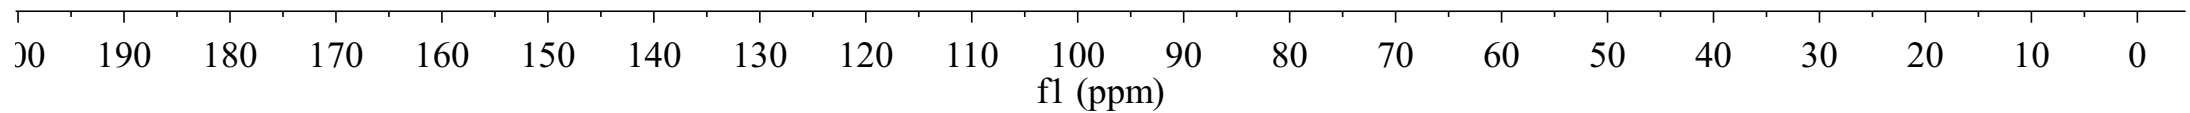

8.528  
8.514  
8.508  
8.494  
8.251  
8.247  
8.230  
8.228  
8.227  
8.225  
7.845  
7.843  
7.840  
7.825  
7.823  
7.820  
7.689  
7.675  
7.672  
7.669  
7.655  
7.651  
7.628  
7.625  
7.607  
7.603  
7.513  
7.511  
7.499  
7.496  
3.602  
2.079  
2.070  
2.062  
2.054  
2.030  
2.022  
1.995  
1.605  
1.603  
1.576  
1.573  
1.544  
1.364  
1.334  
1.283  
1.203  
1.194  
0.949  
0.921

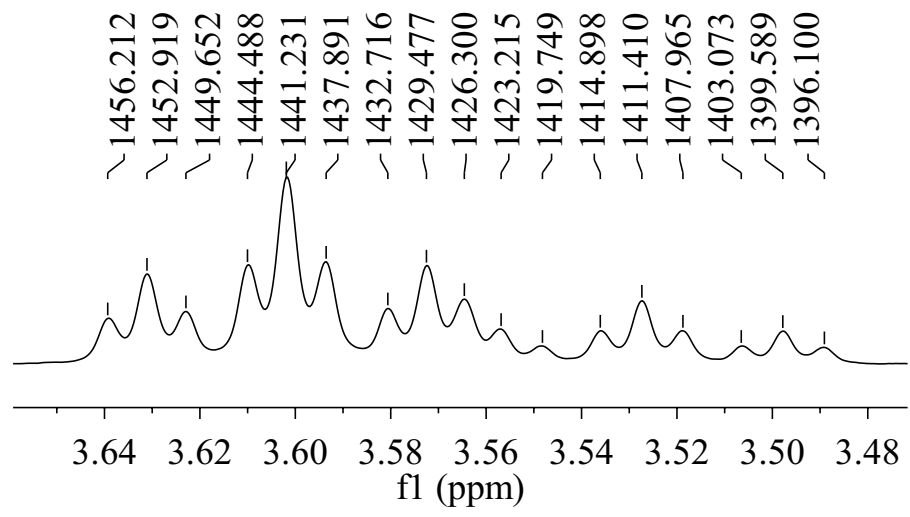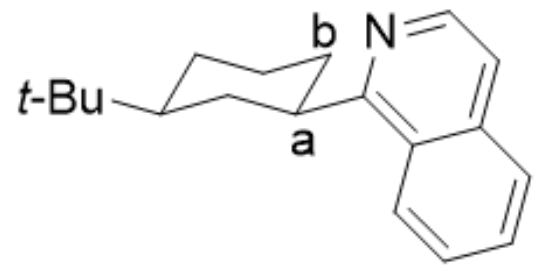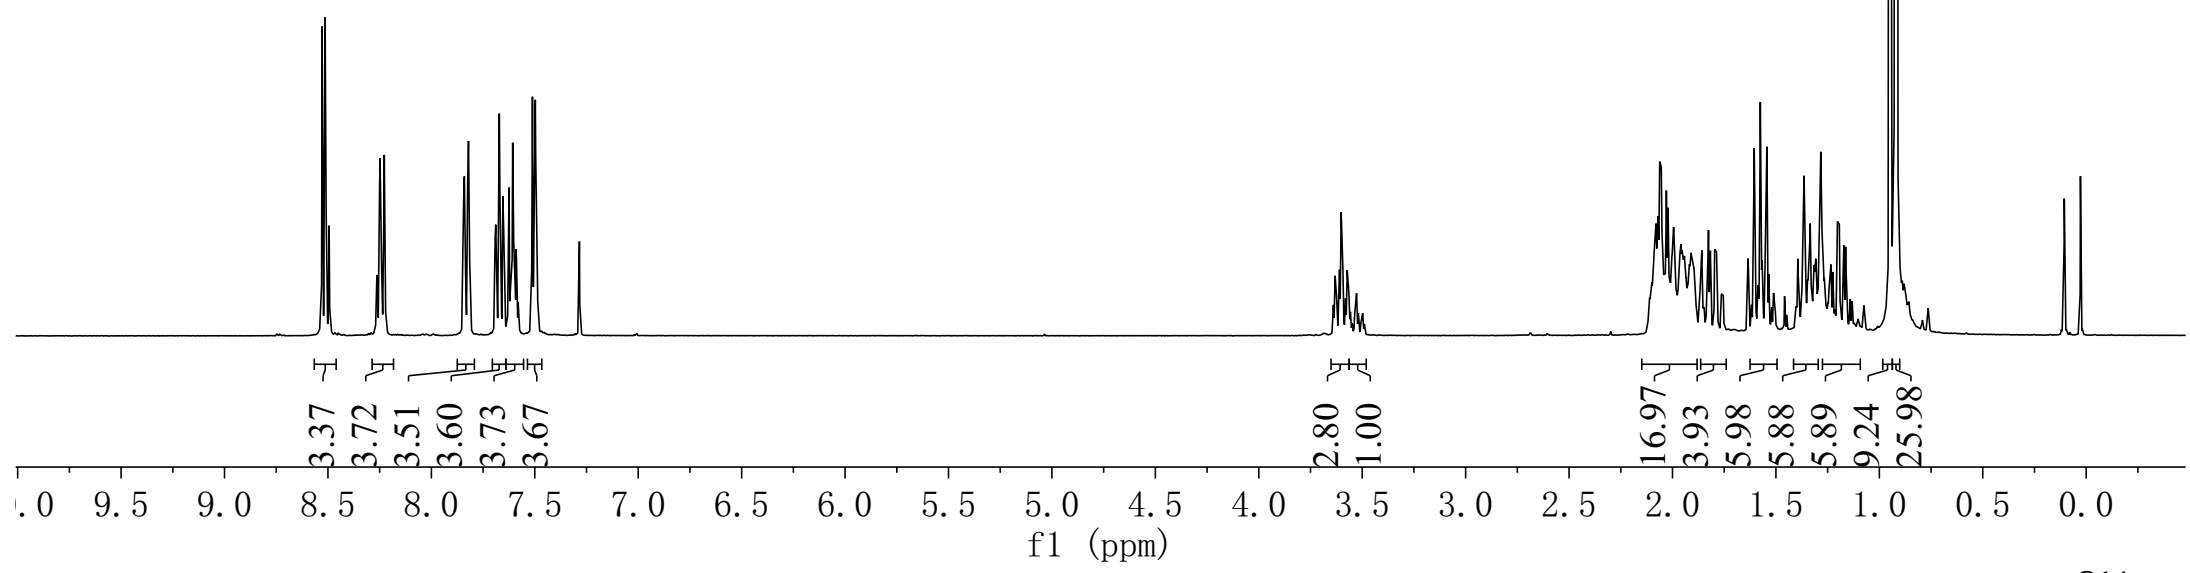

165.97  
165.76  
142.13  
142.10  
136.54  
136.49  
129.66  
129.63  
127.70  
127.67  
126.98  
126.89  
126.56  
126.45  
124.89  
124.79  
119.00  
118.98

77.48  
77.16  
76.84  
48.89  
47.90  
42.06  
41.70  
33.92  
33.02  
32.89  
32.67  
32.53  
27.81  
27.79  
27.26  
27.24

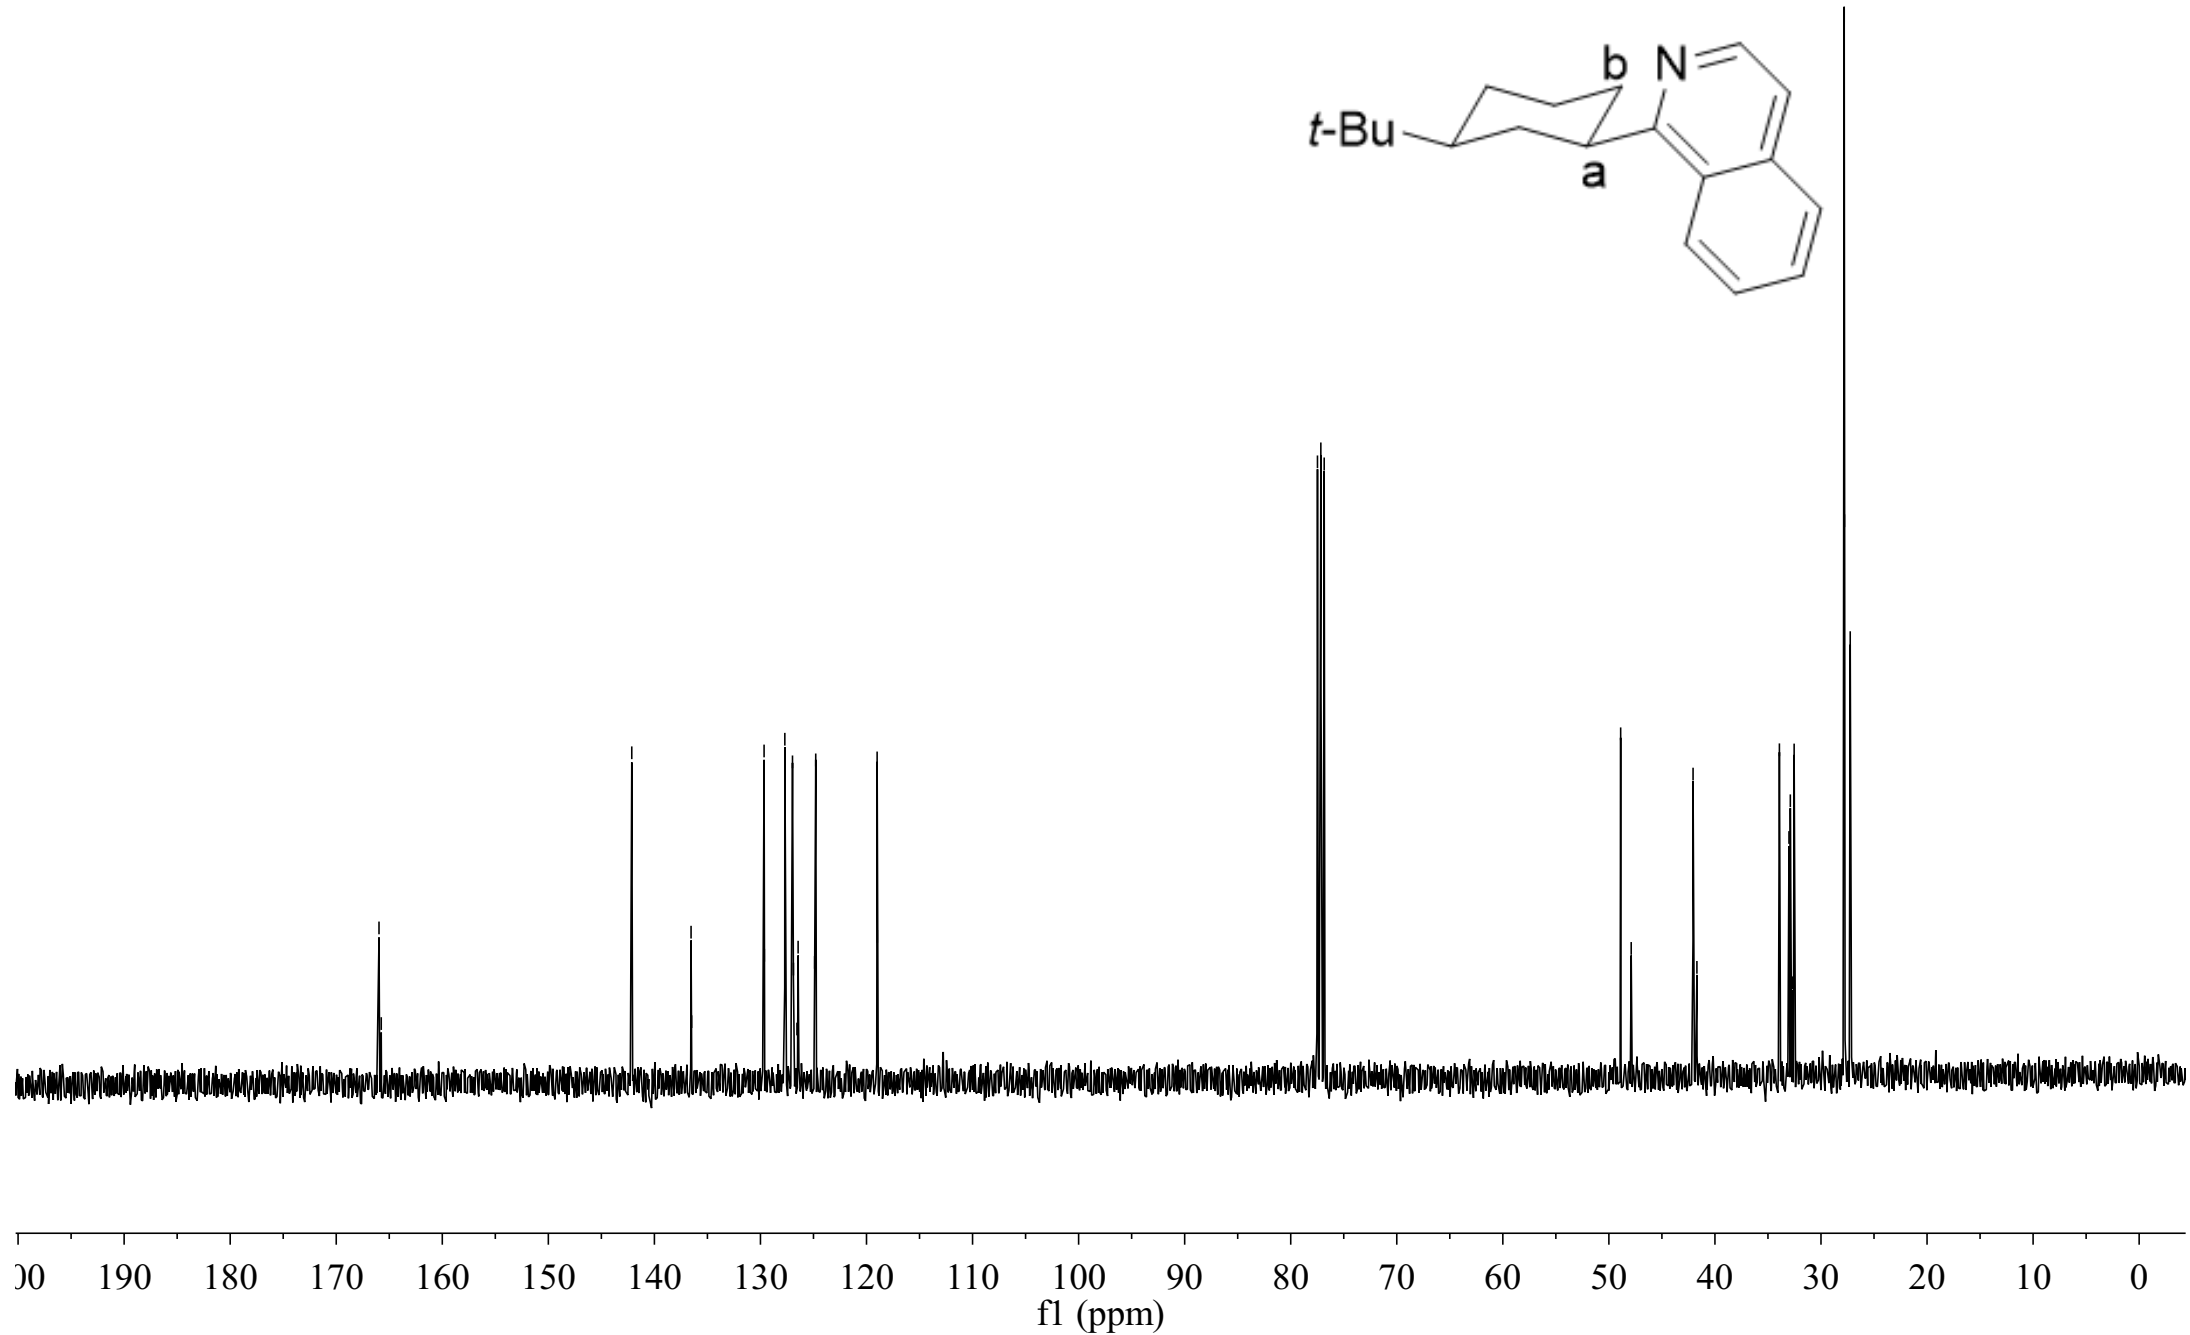

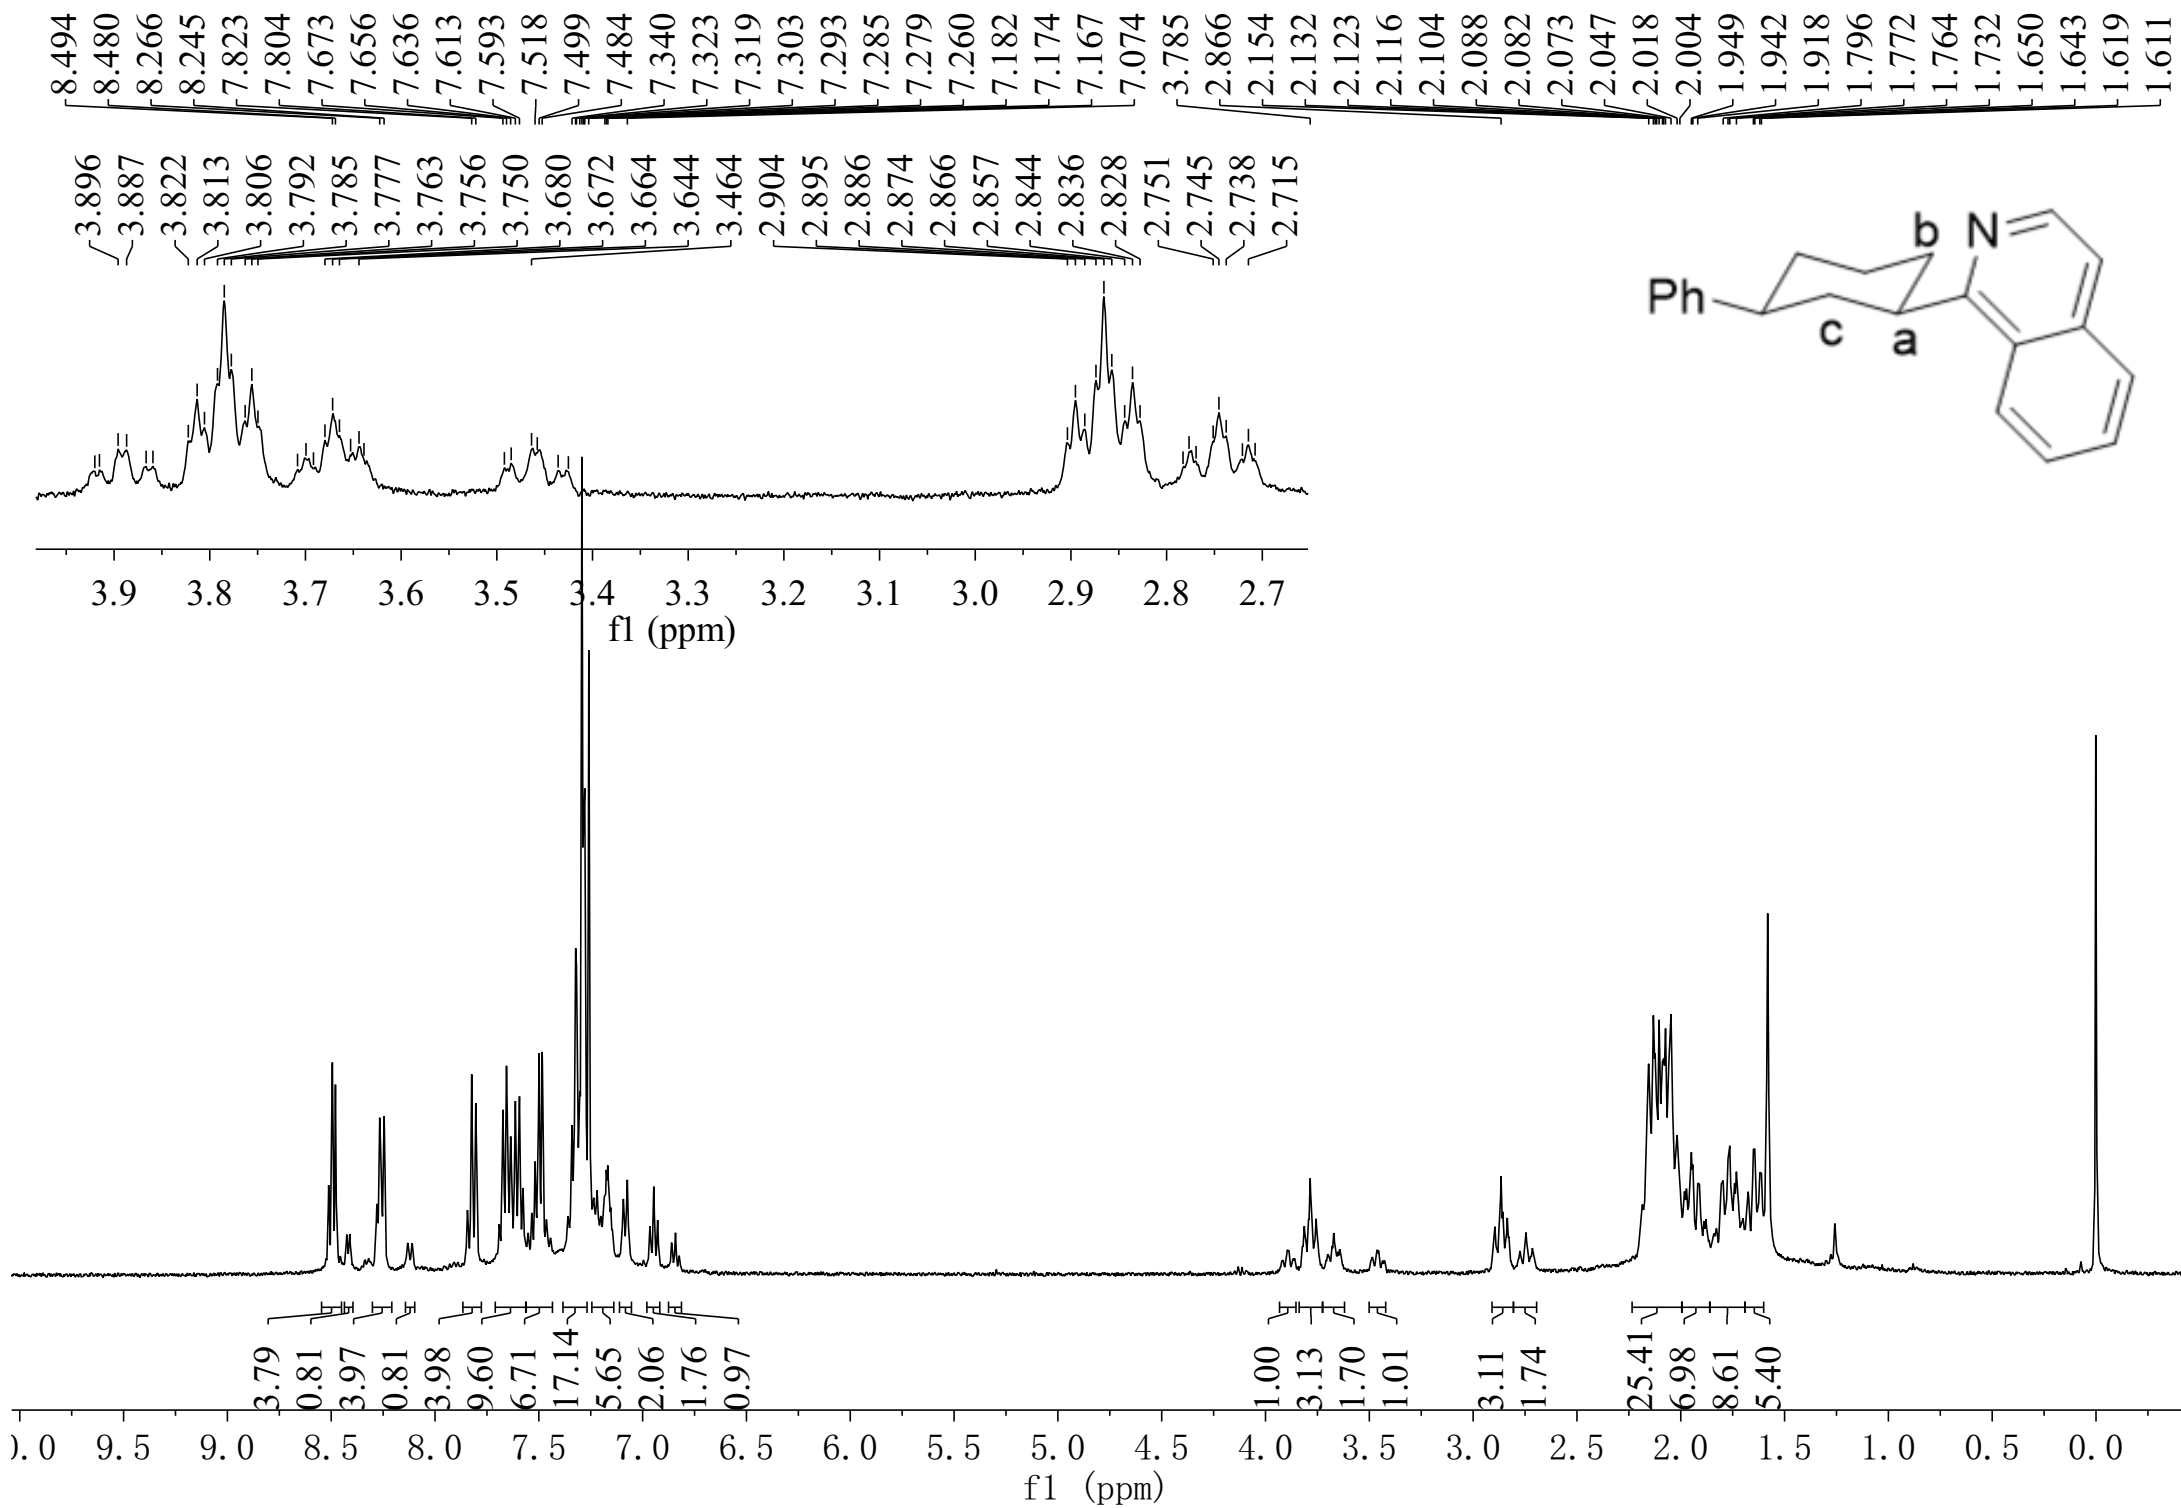



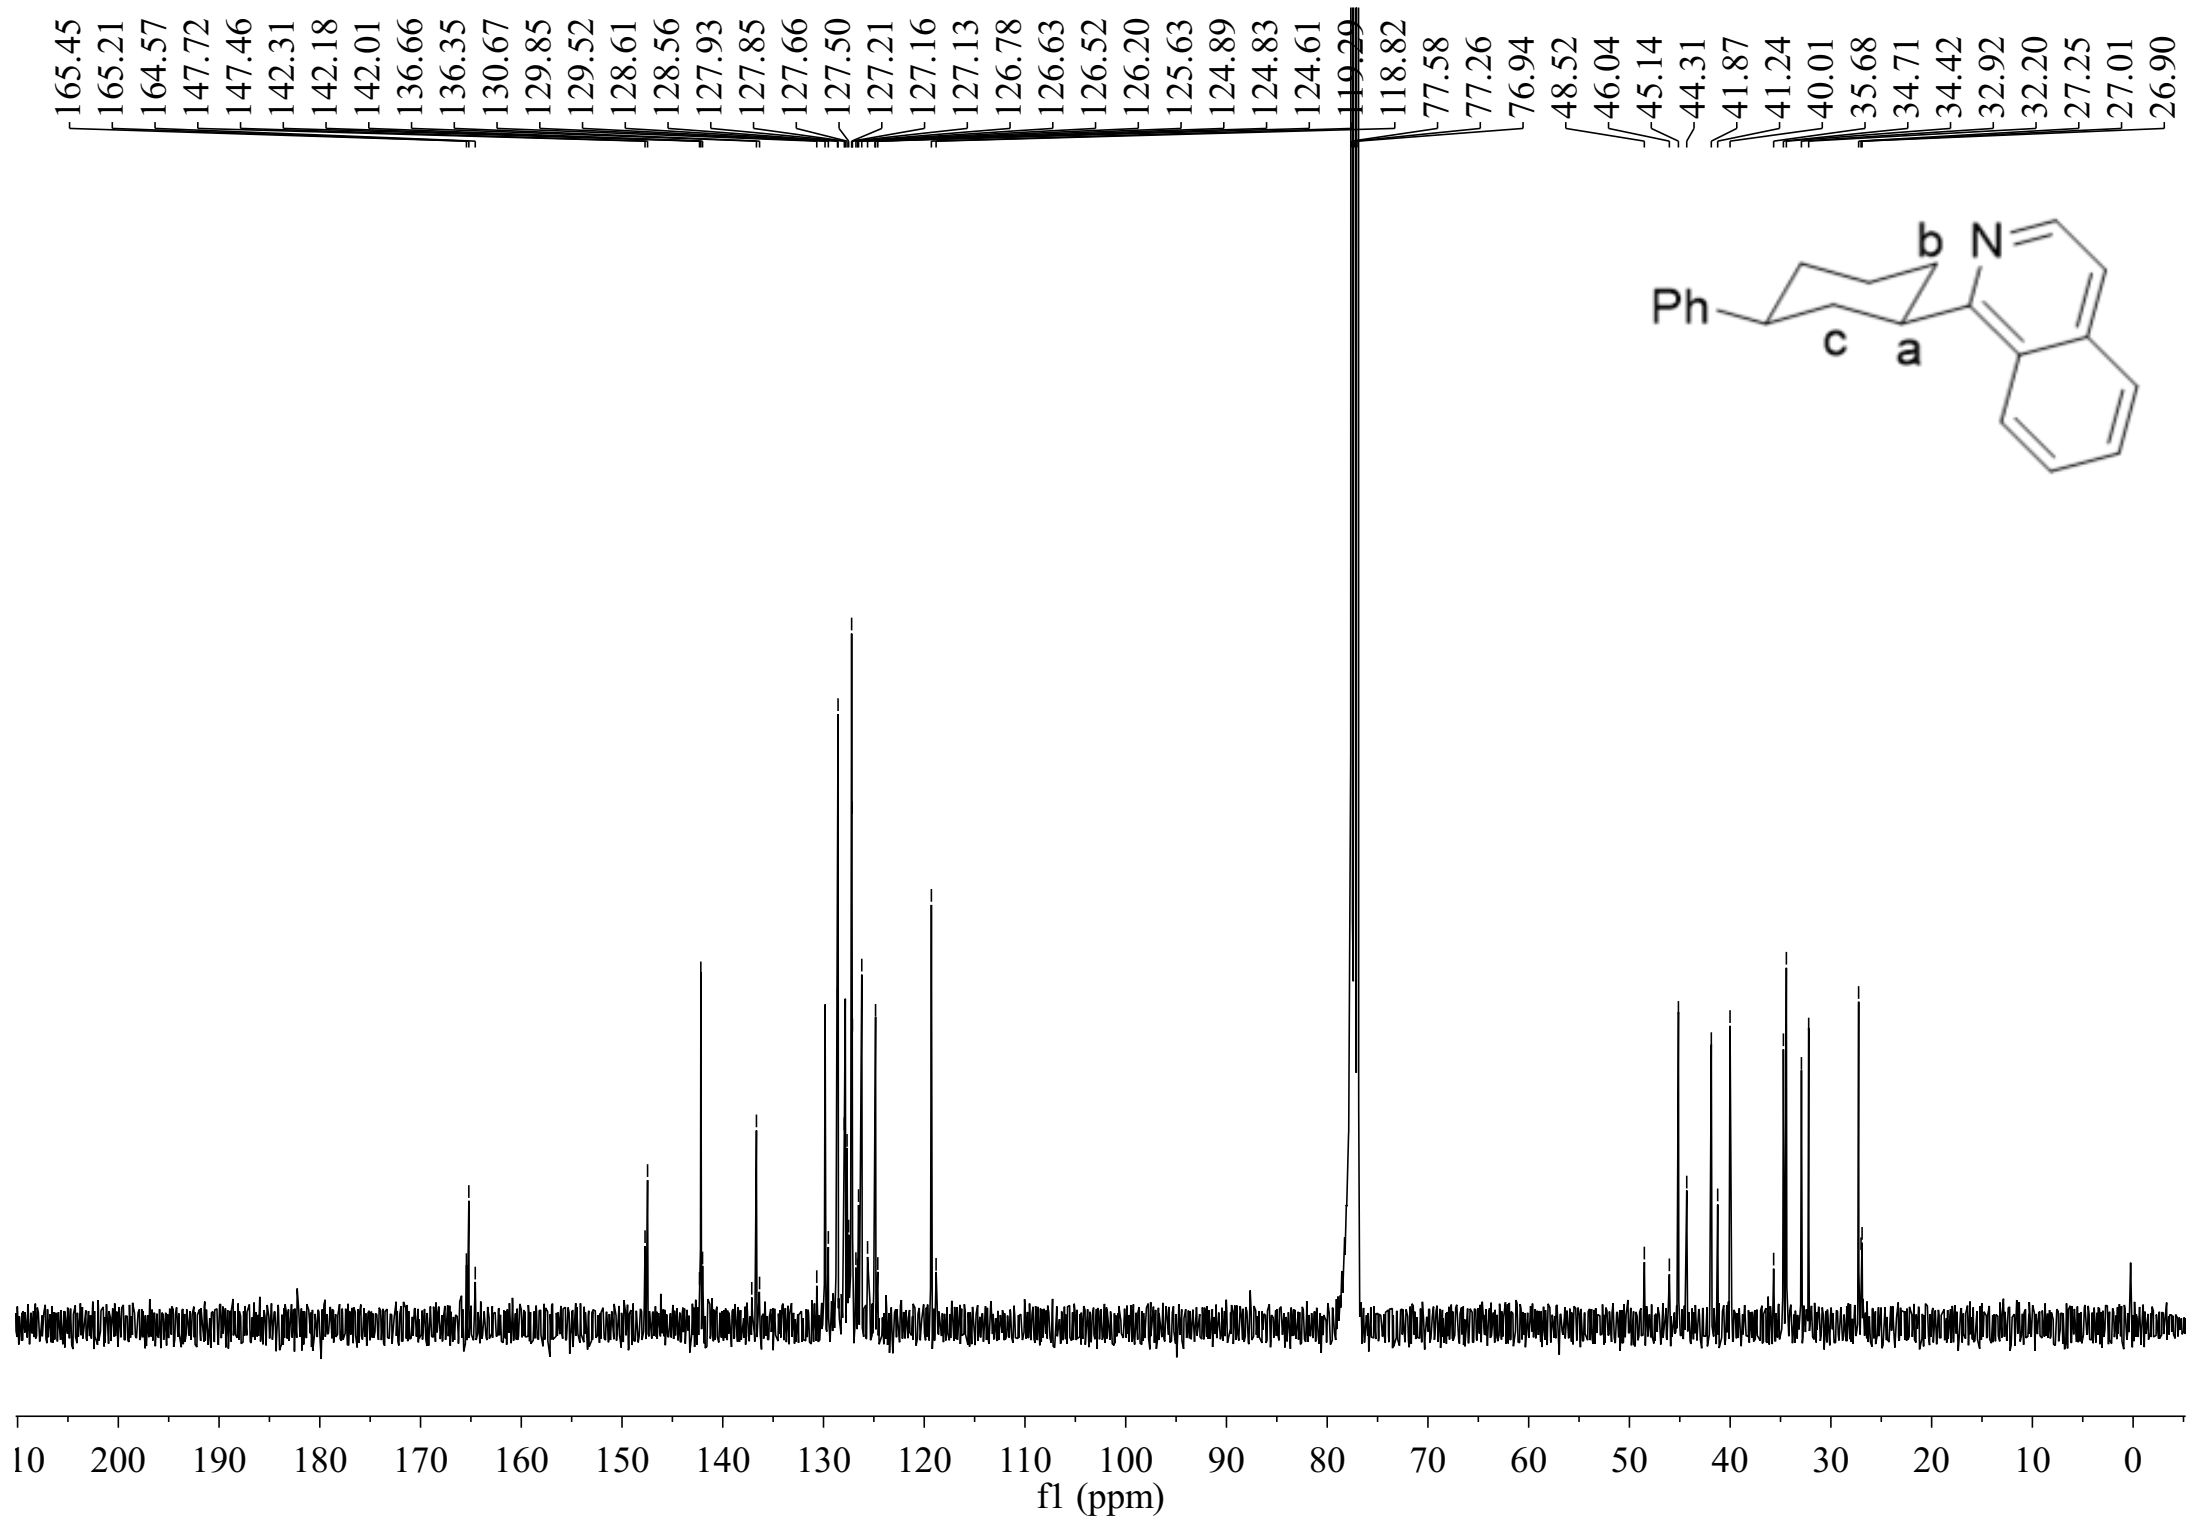

8.490  
8.476  
8.236  
8.215  
7.819  
7.799  
7.672  
7.669  
7.655  
7.652  
7.648  
7.635  
7.631  
7.604  
7.601  
7.583  
7.579  
7.488  
7.475  
7.260  
1.888  
1.880  
1.860  
1.847  
1.831  
1.824  
1.799  
1.790  
1.751  
1.747  
1.740  
1.732  
1.728  
1.723  
1.704  
1.695  
1.687  
1.665  
1.651  
1.633  
1.308  
1.282  
1.256  
1.240  
1.225  
1.134  
1.126  
1.101  
1.097  
1.067

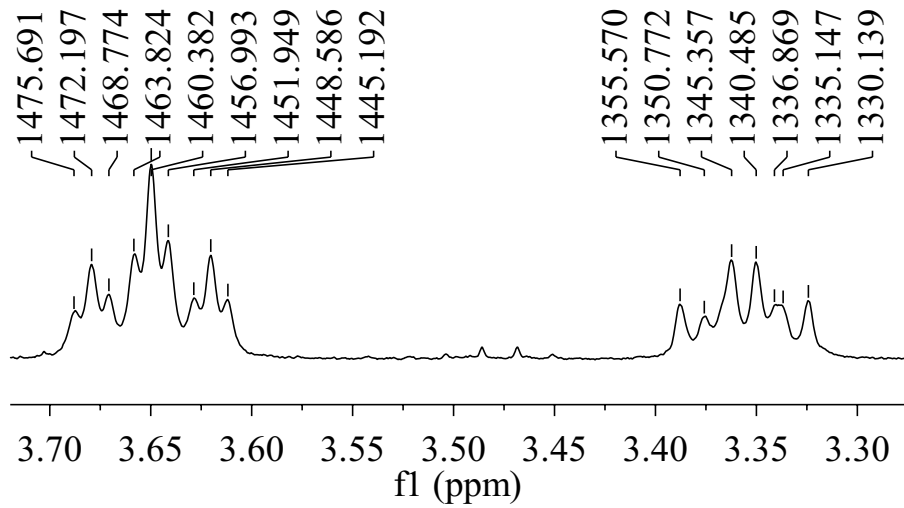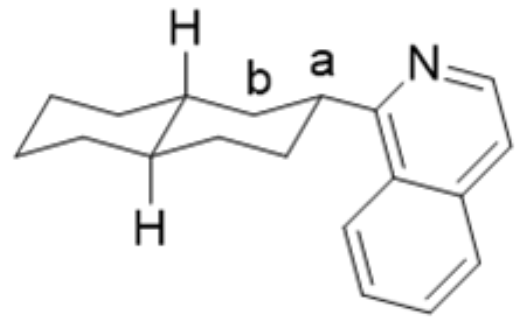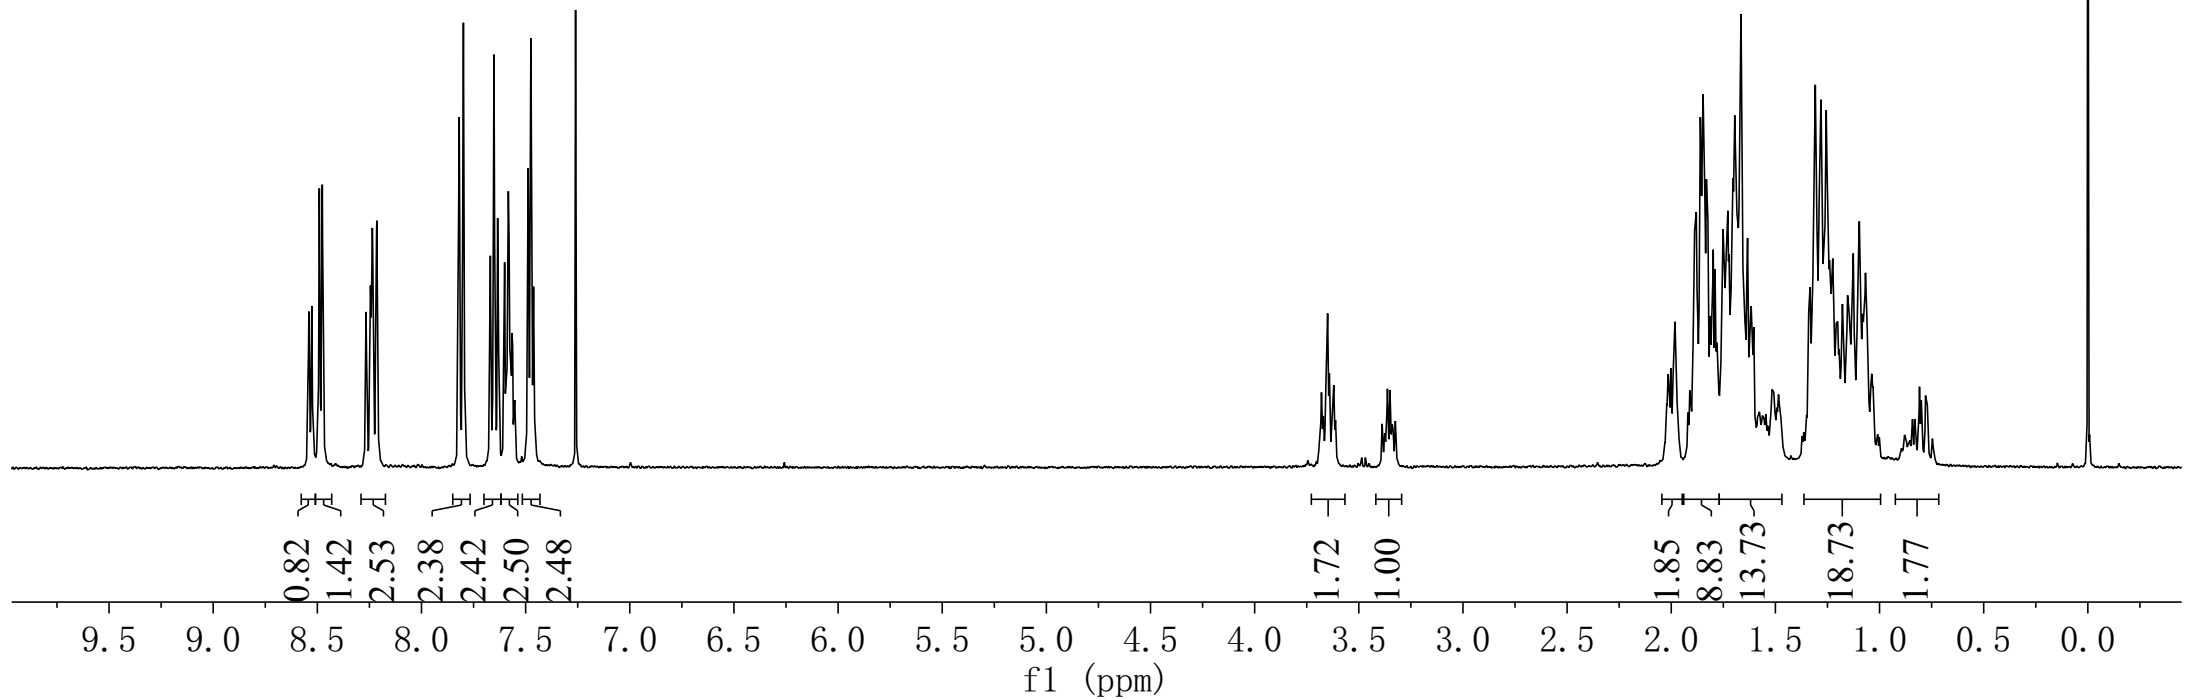

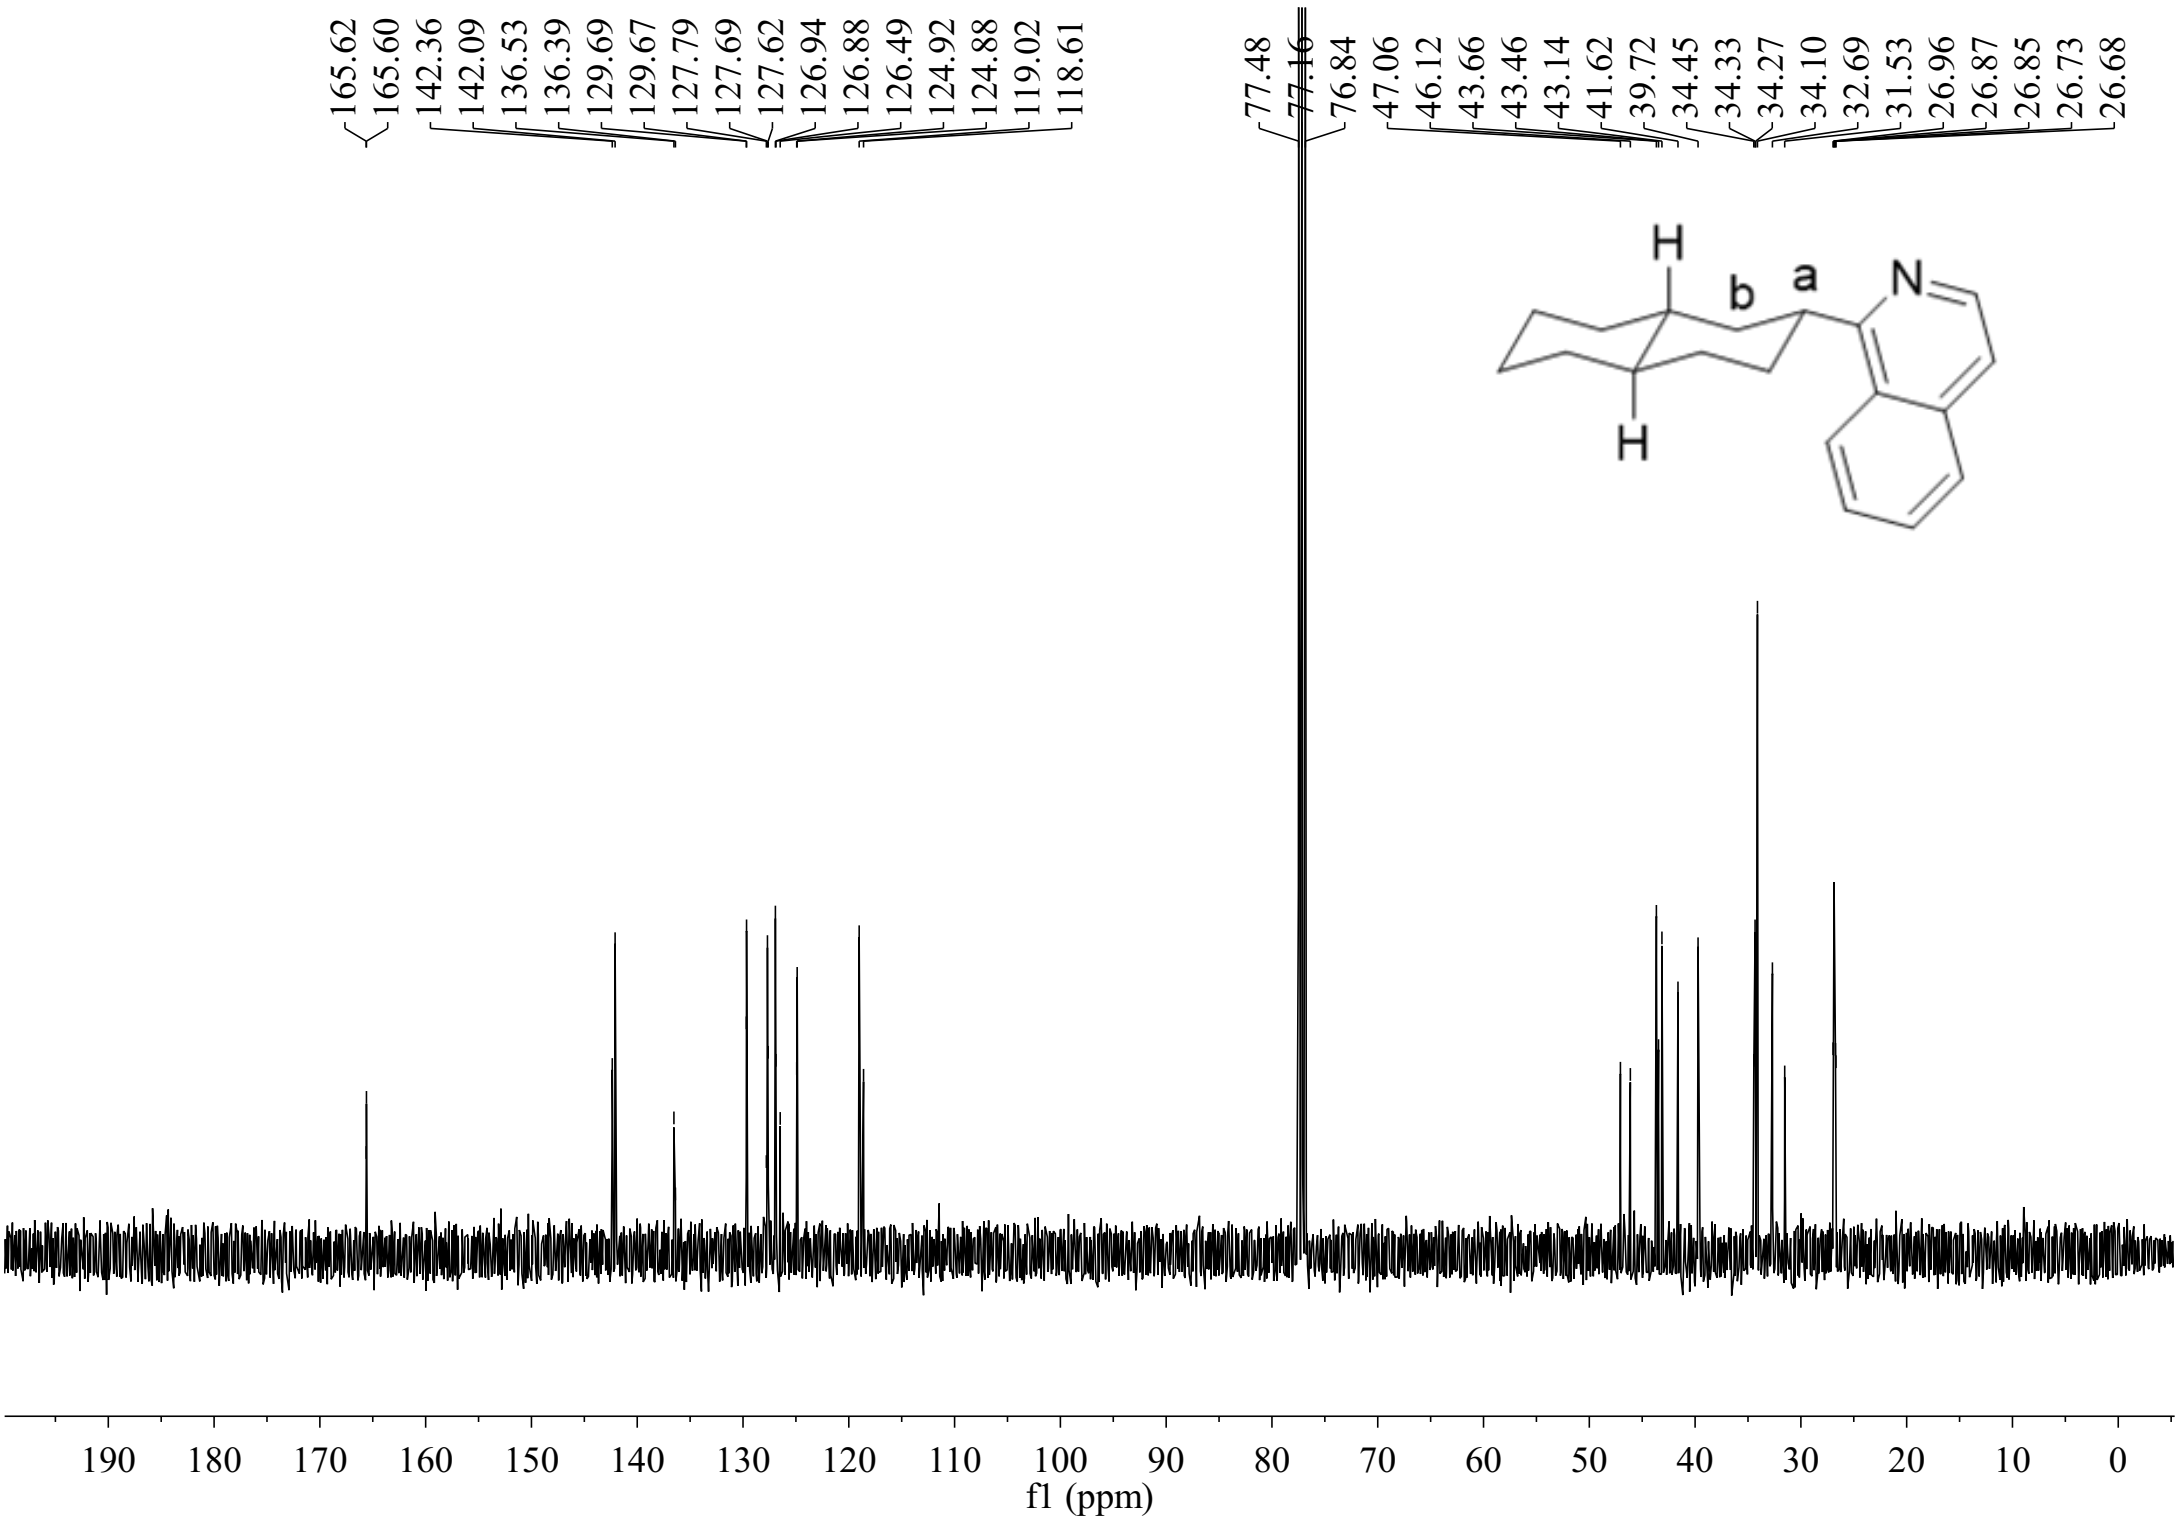

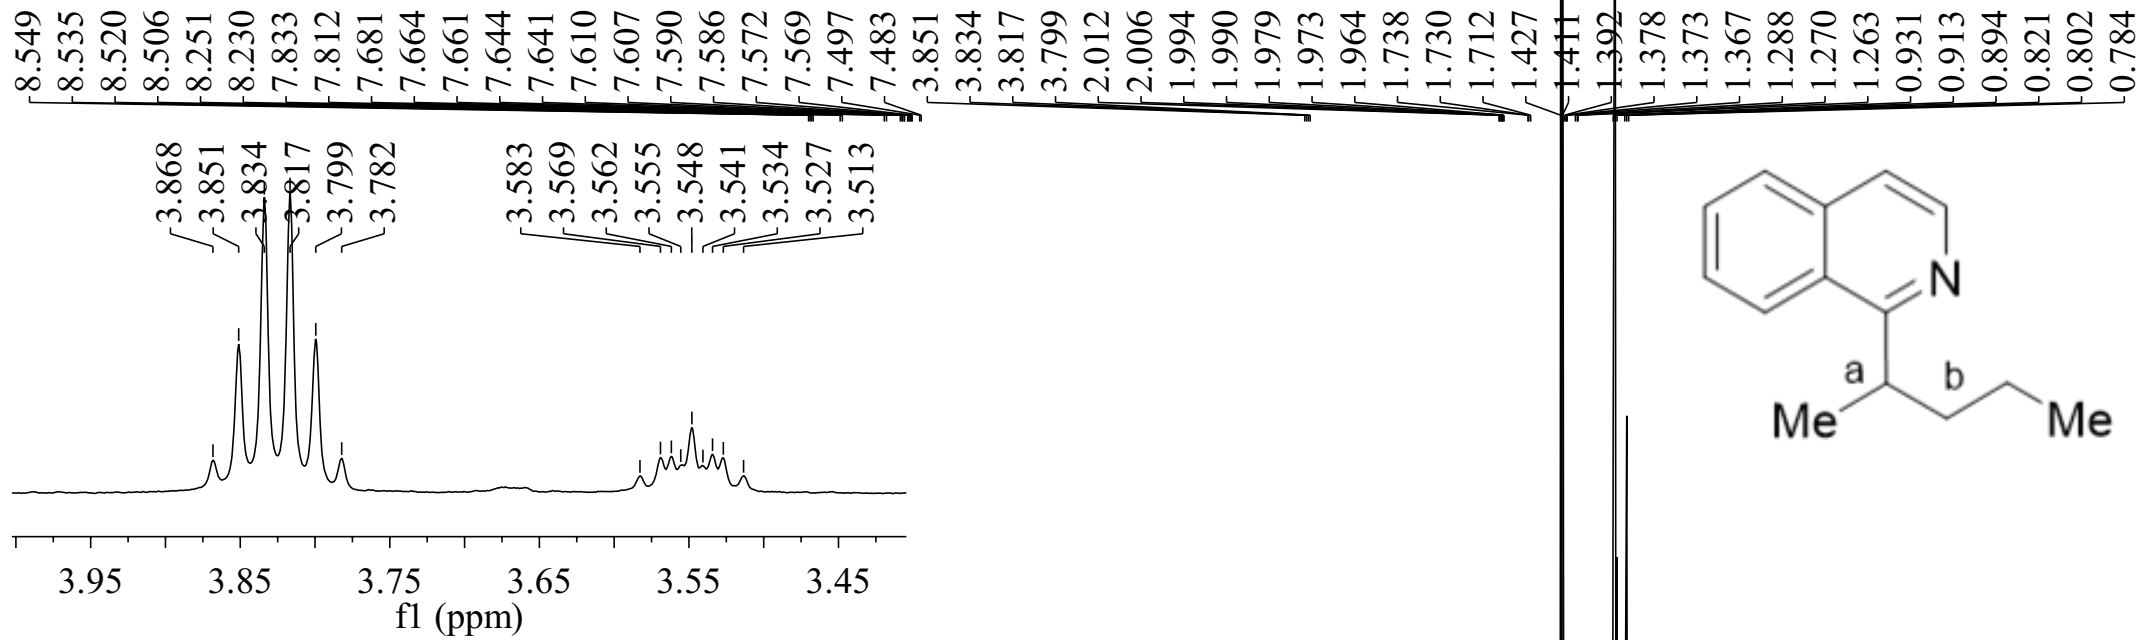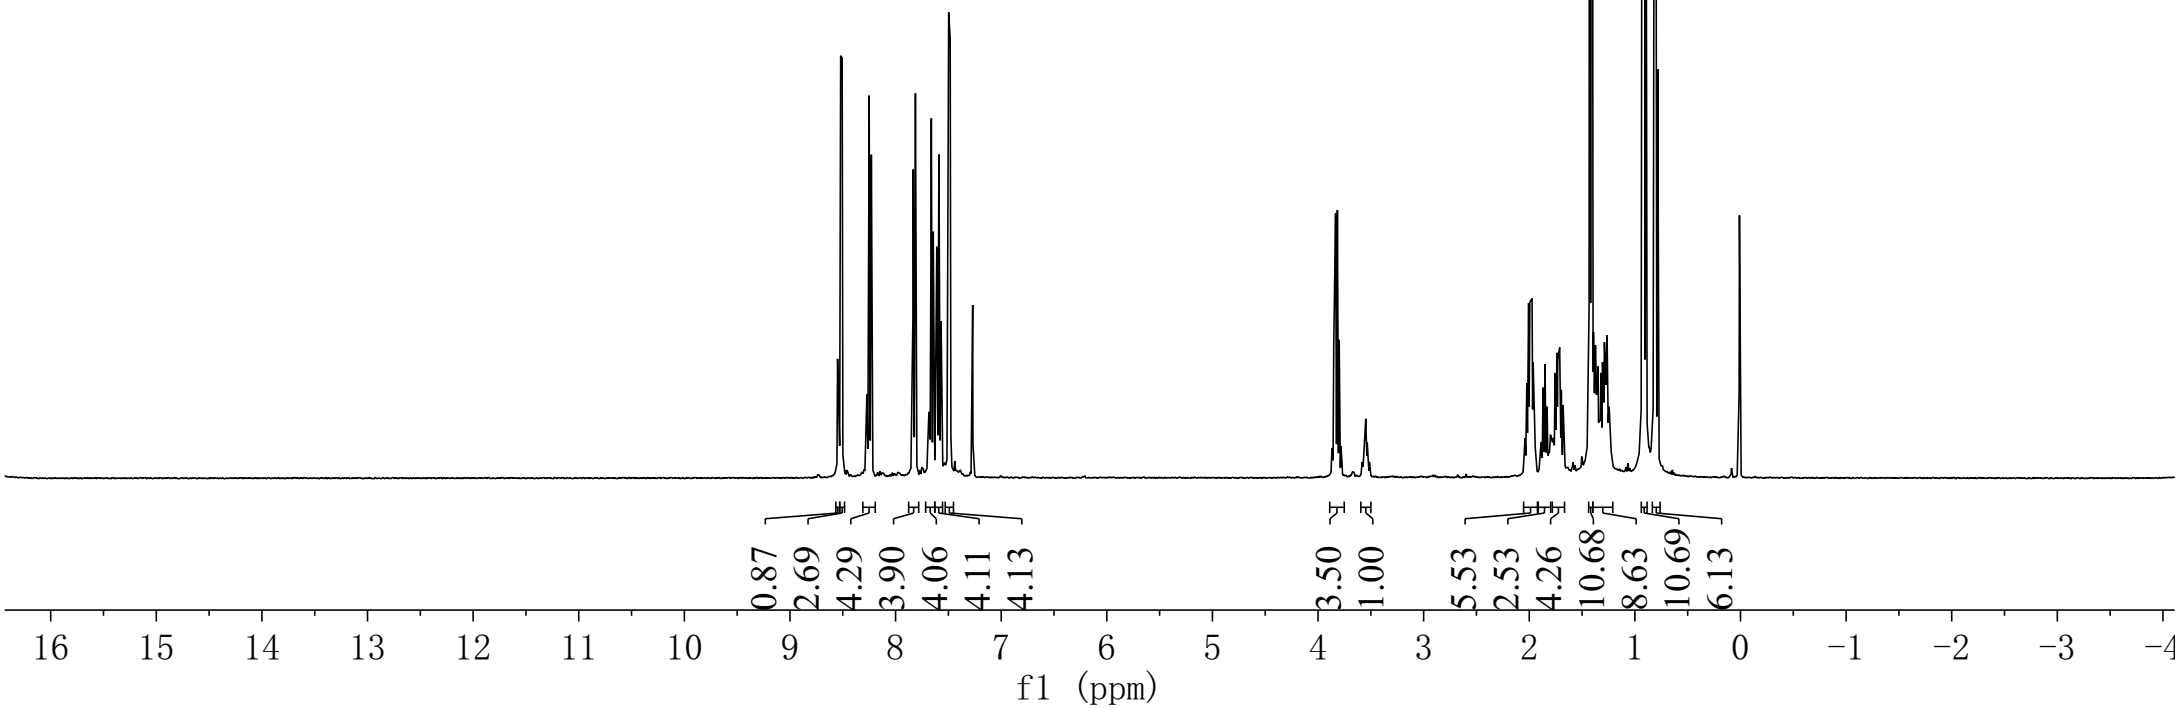

166.07  
165.01  
142.06  
141.99  
136.34  
136.21  
129.50  
129.47  
127.51  
127.45  
126.79  
126.77  
126.72  
124.91  
124.70  
118.76  
118.61

77.32  
77.00  
76.68

44.78  
39.00  
35.78  
28.15  
20.98  
20.50  
14.27  
12.30

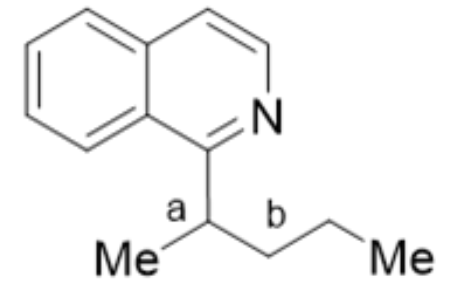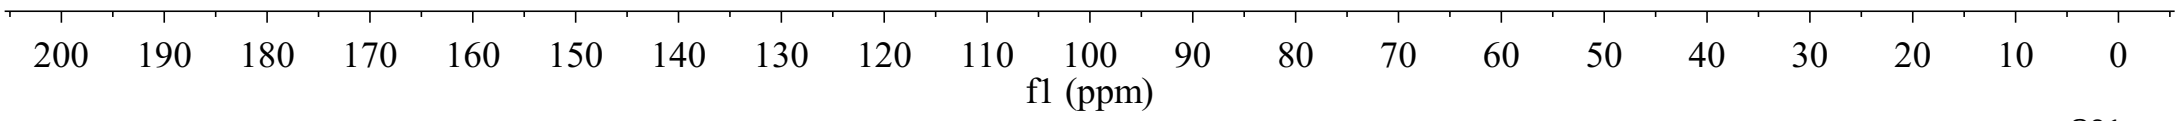

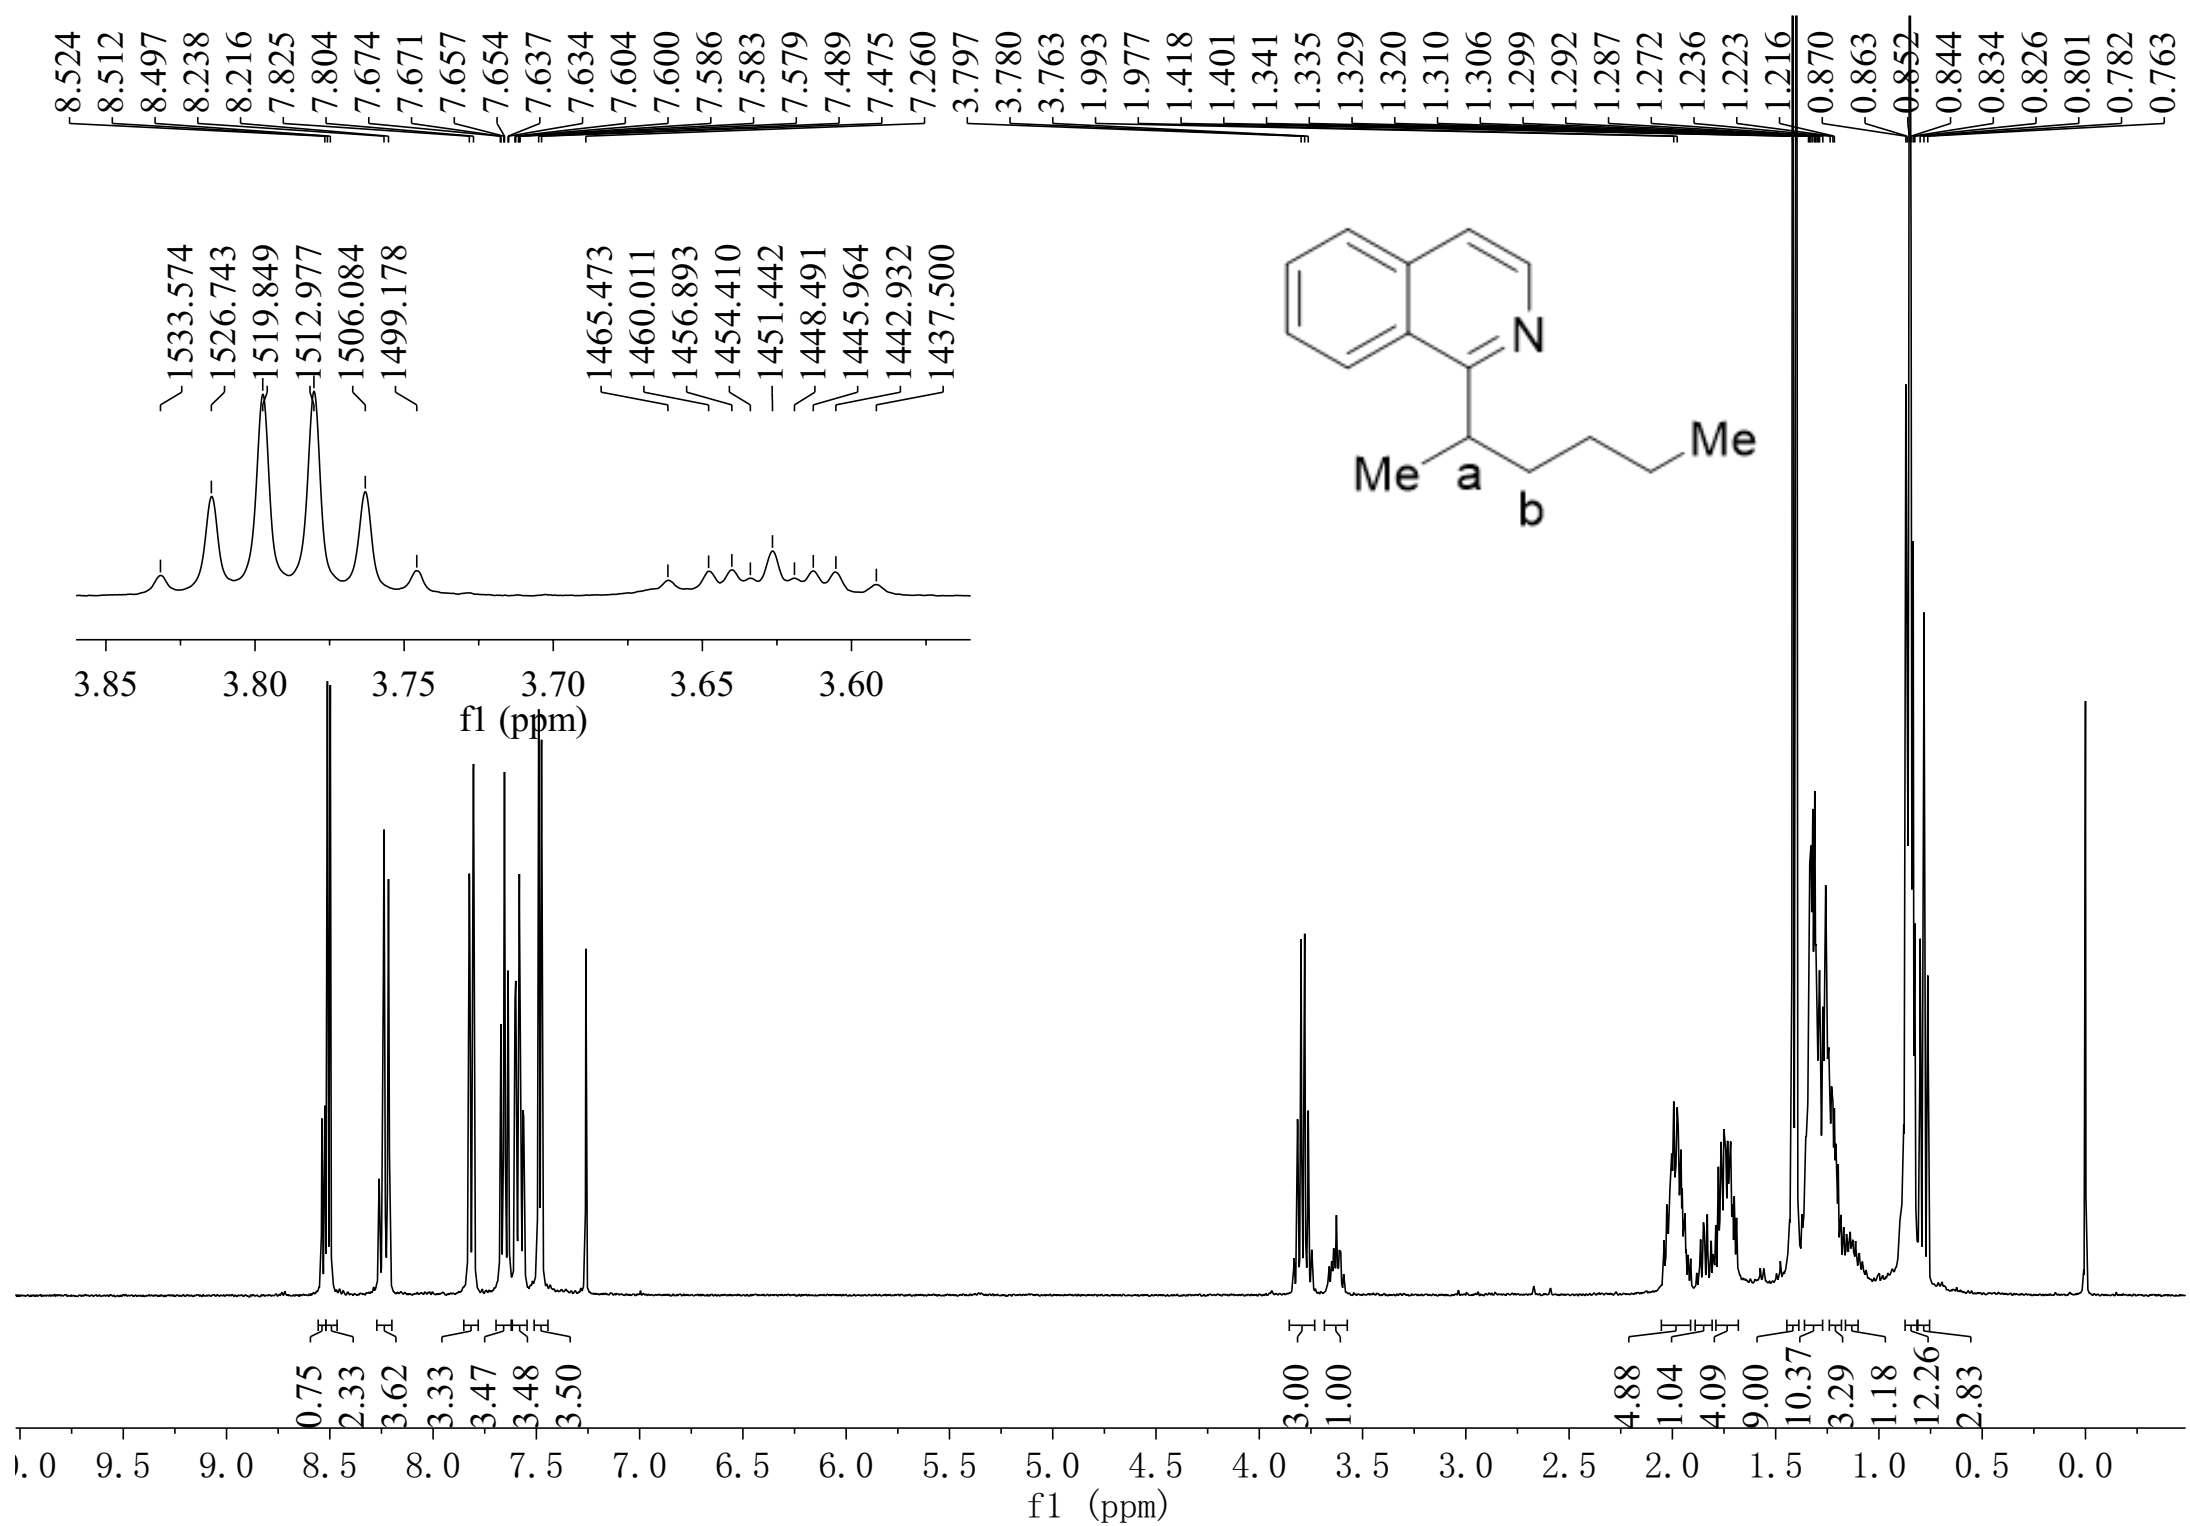

166.28  
165.43  
142.25  
142.15  
136.51  
136.38  
129.67  
127.68  
127.63  
126.96  
126.92  
126.90  
125.02  
124.87  
118.93  
118.75

77.48  
77.16  
76.84

37.81  
36.68  
36.21  
30.29  
28.72  
23.07  
21.12  
20.68  
14.49  
14.24  
12.48

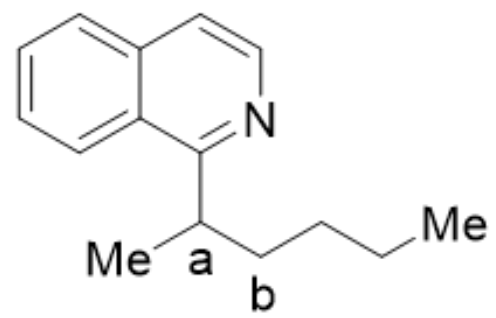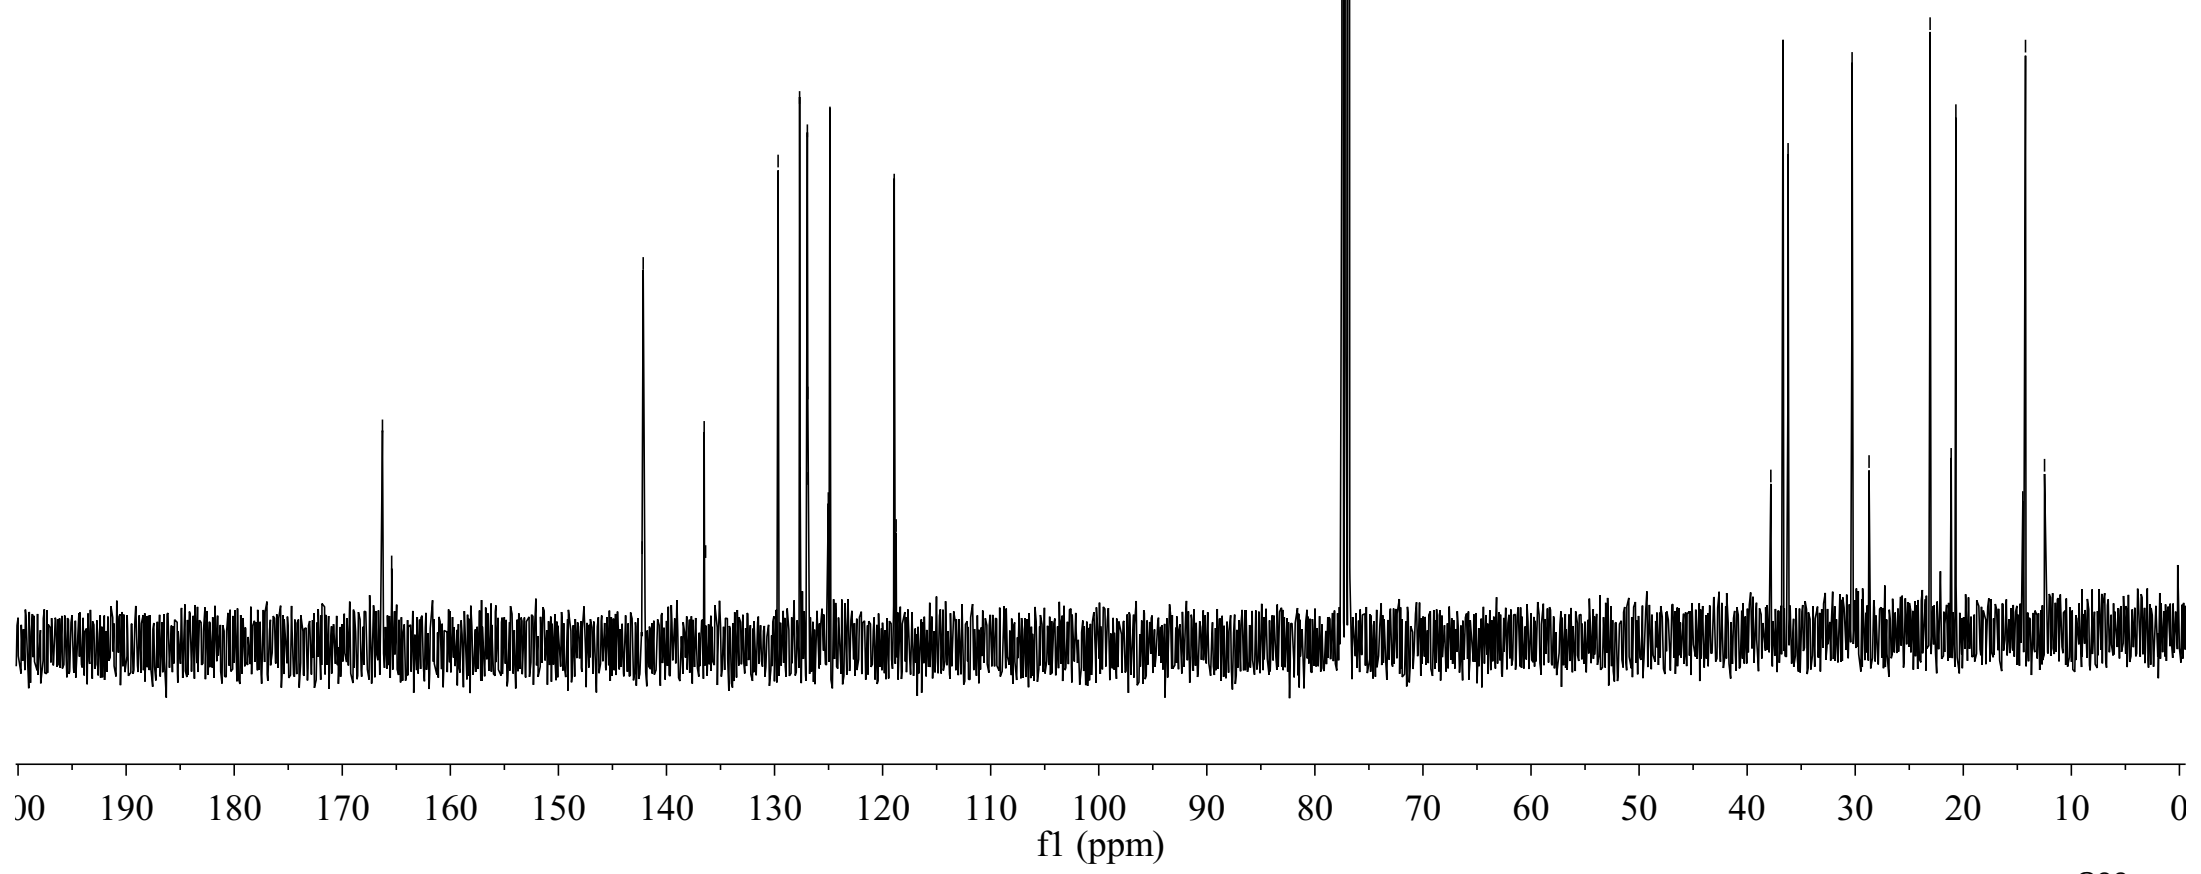

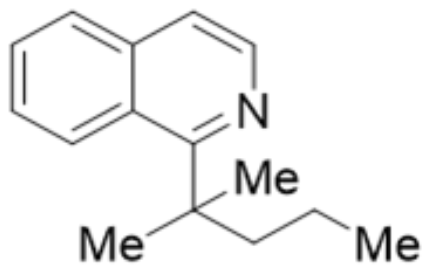

8.561  
8.539  
8.460  
8.446  
7.840  
7.820  
7.646  
7.643  
7.629  
7.626  
7.609  
7.606  
7.567  
7.563  
7.550  
7.545  
7.542  
7.528  
7.525  
7.499  
7.485  
7.270

2.114  
2.102  
2.093  
2.082  
2.072  
1.638  
1.107  
1.088  
1.076  
1.070  
1.058  
1.048  
1.040  
1.028  
1.010  
0.804  
0.785  
0.767  
0.012

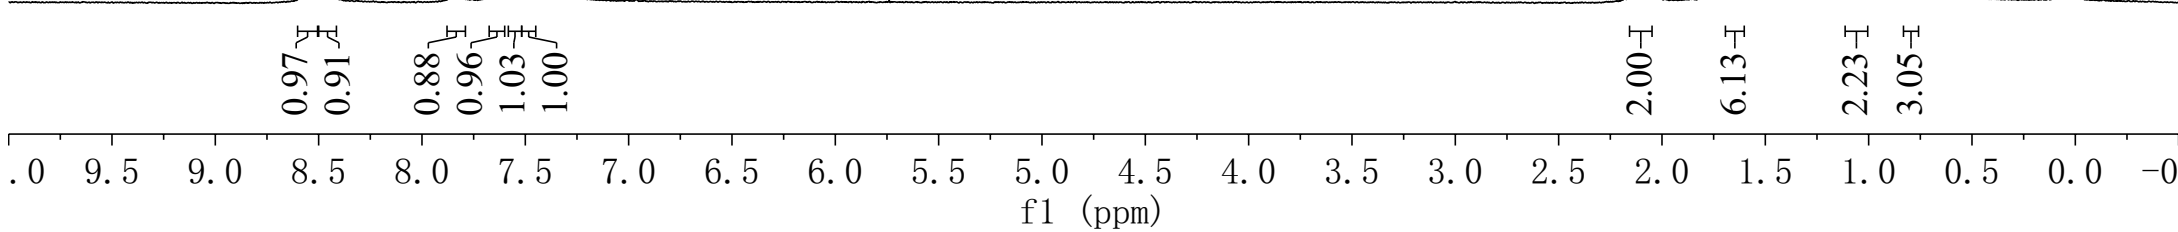



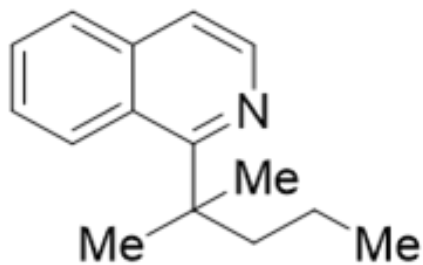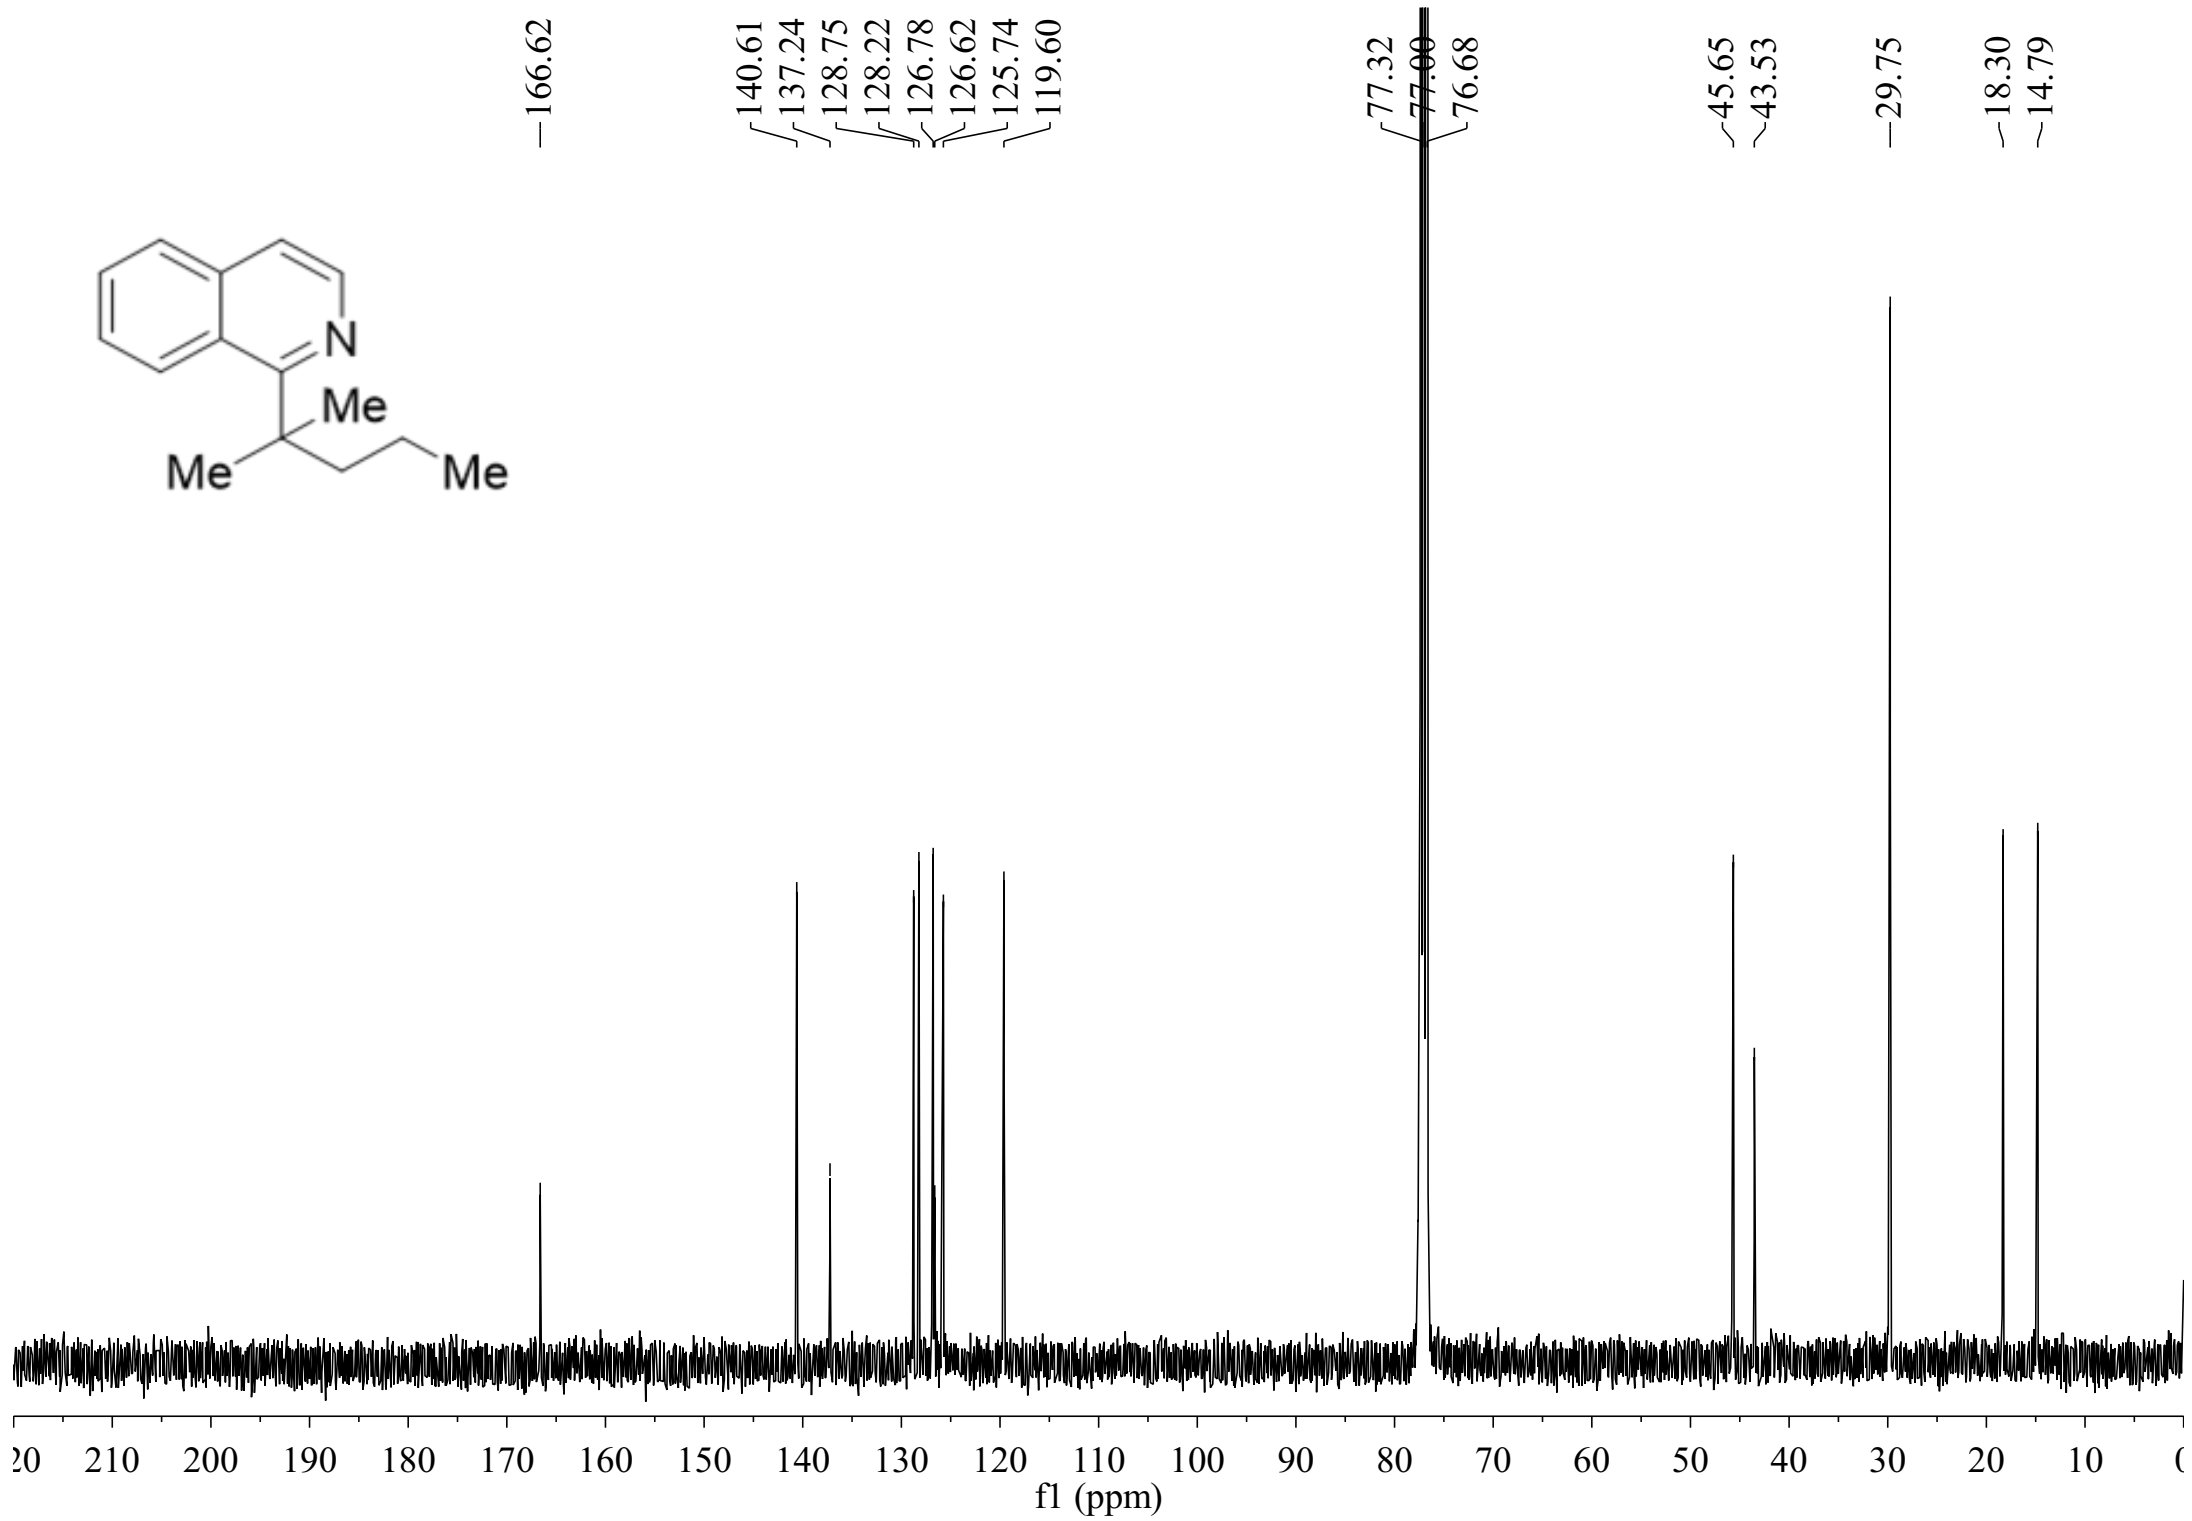

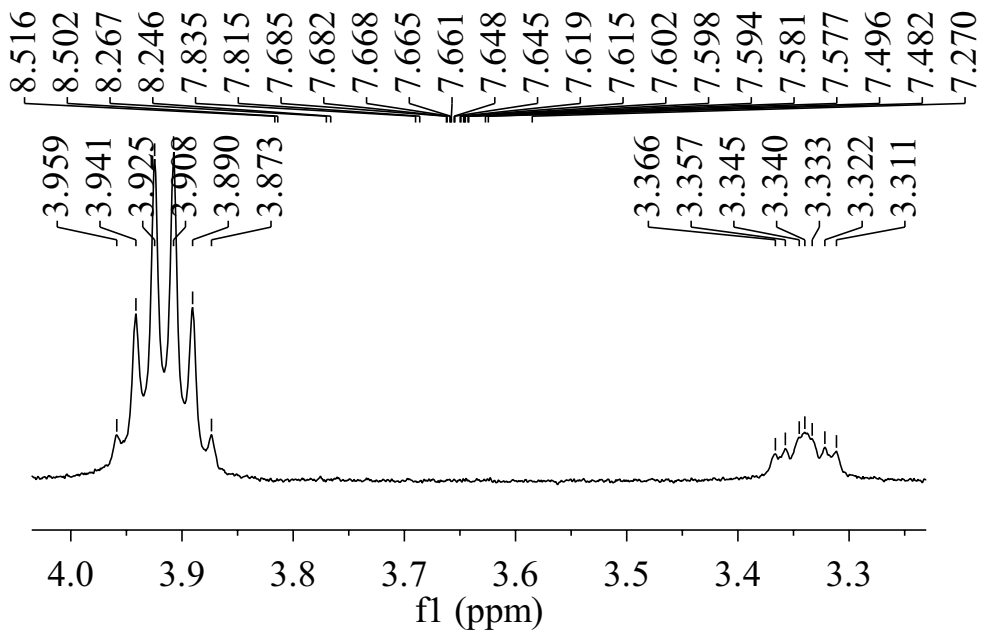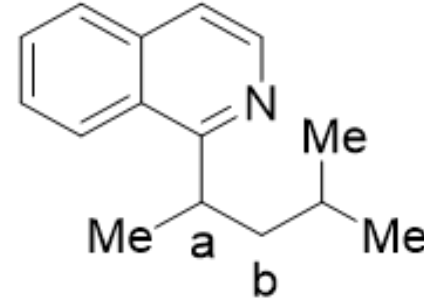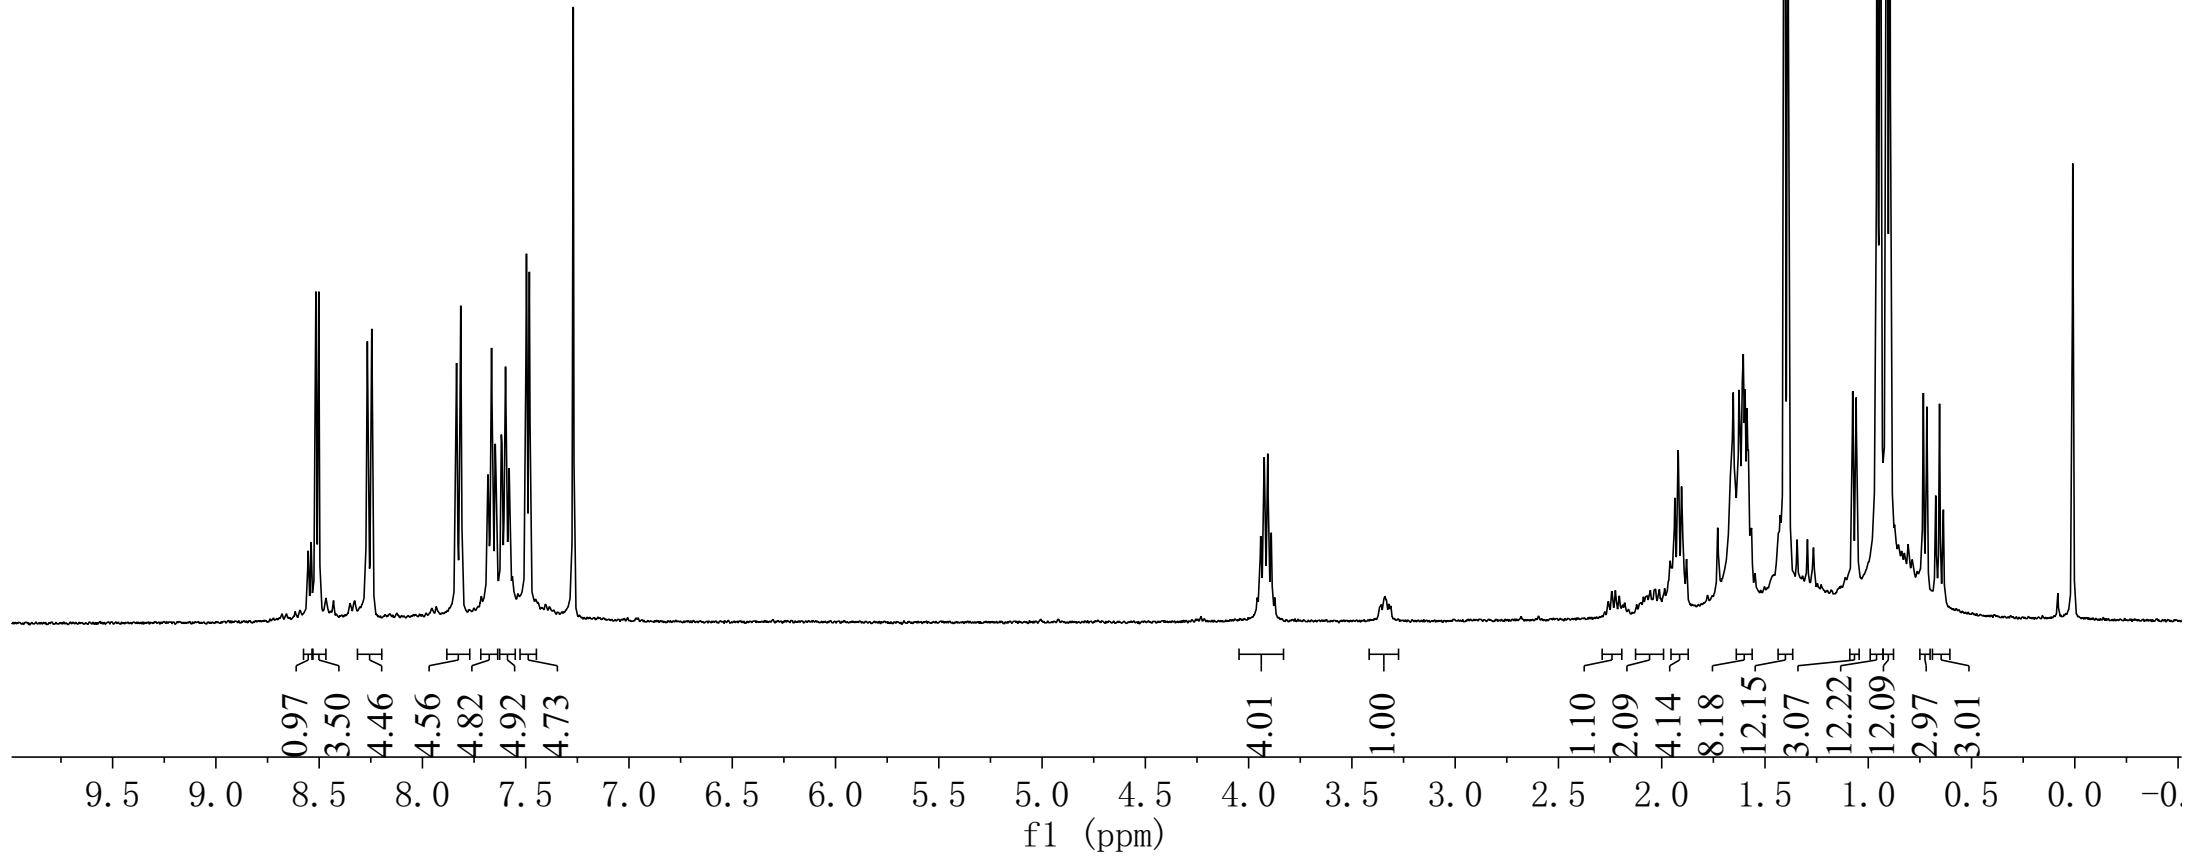

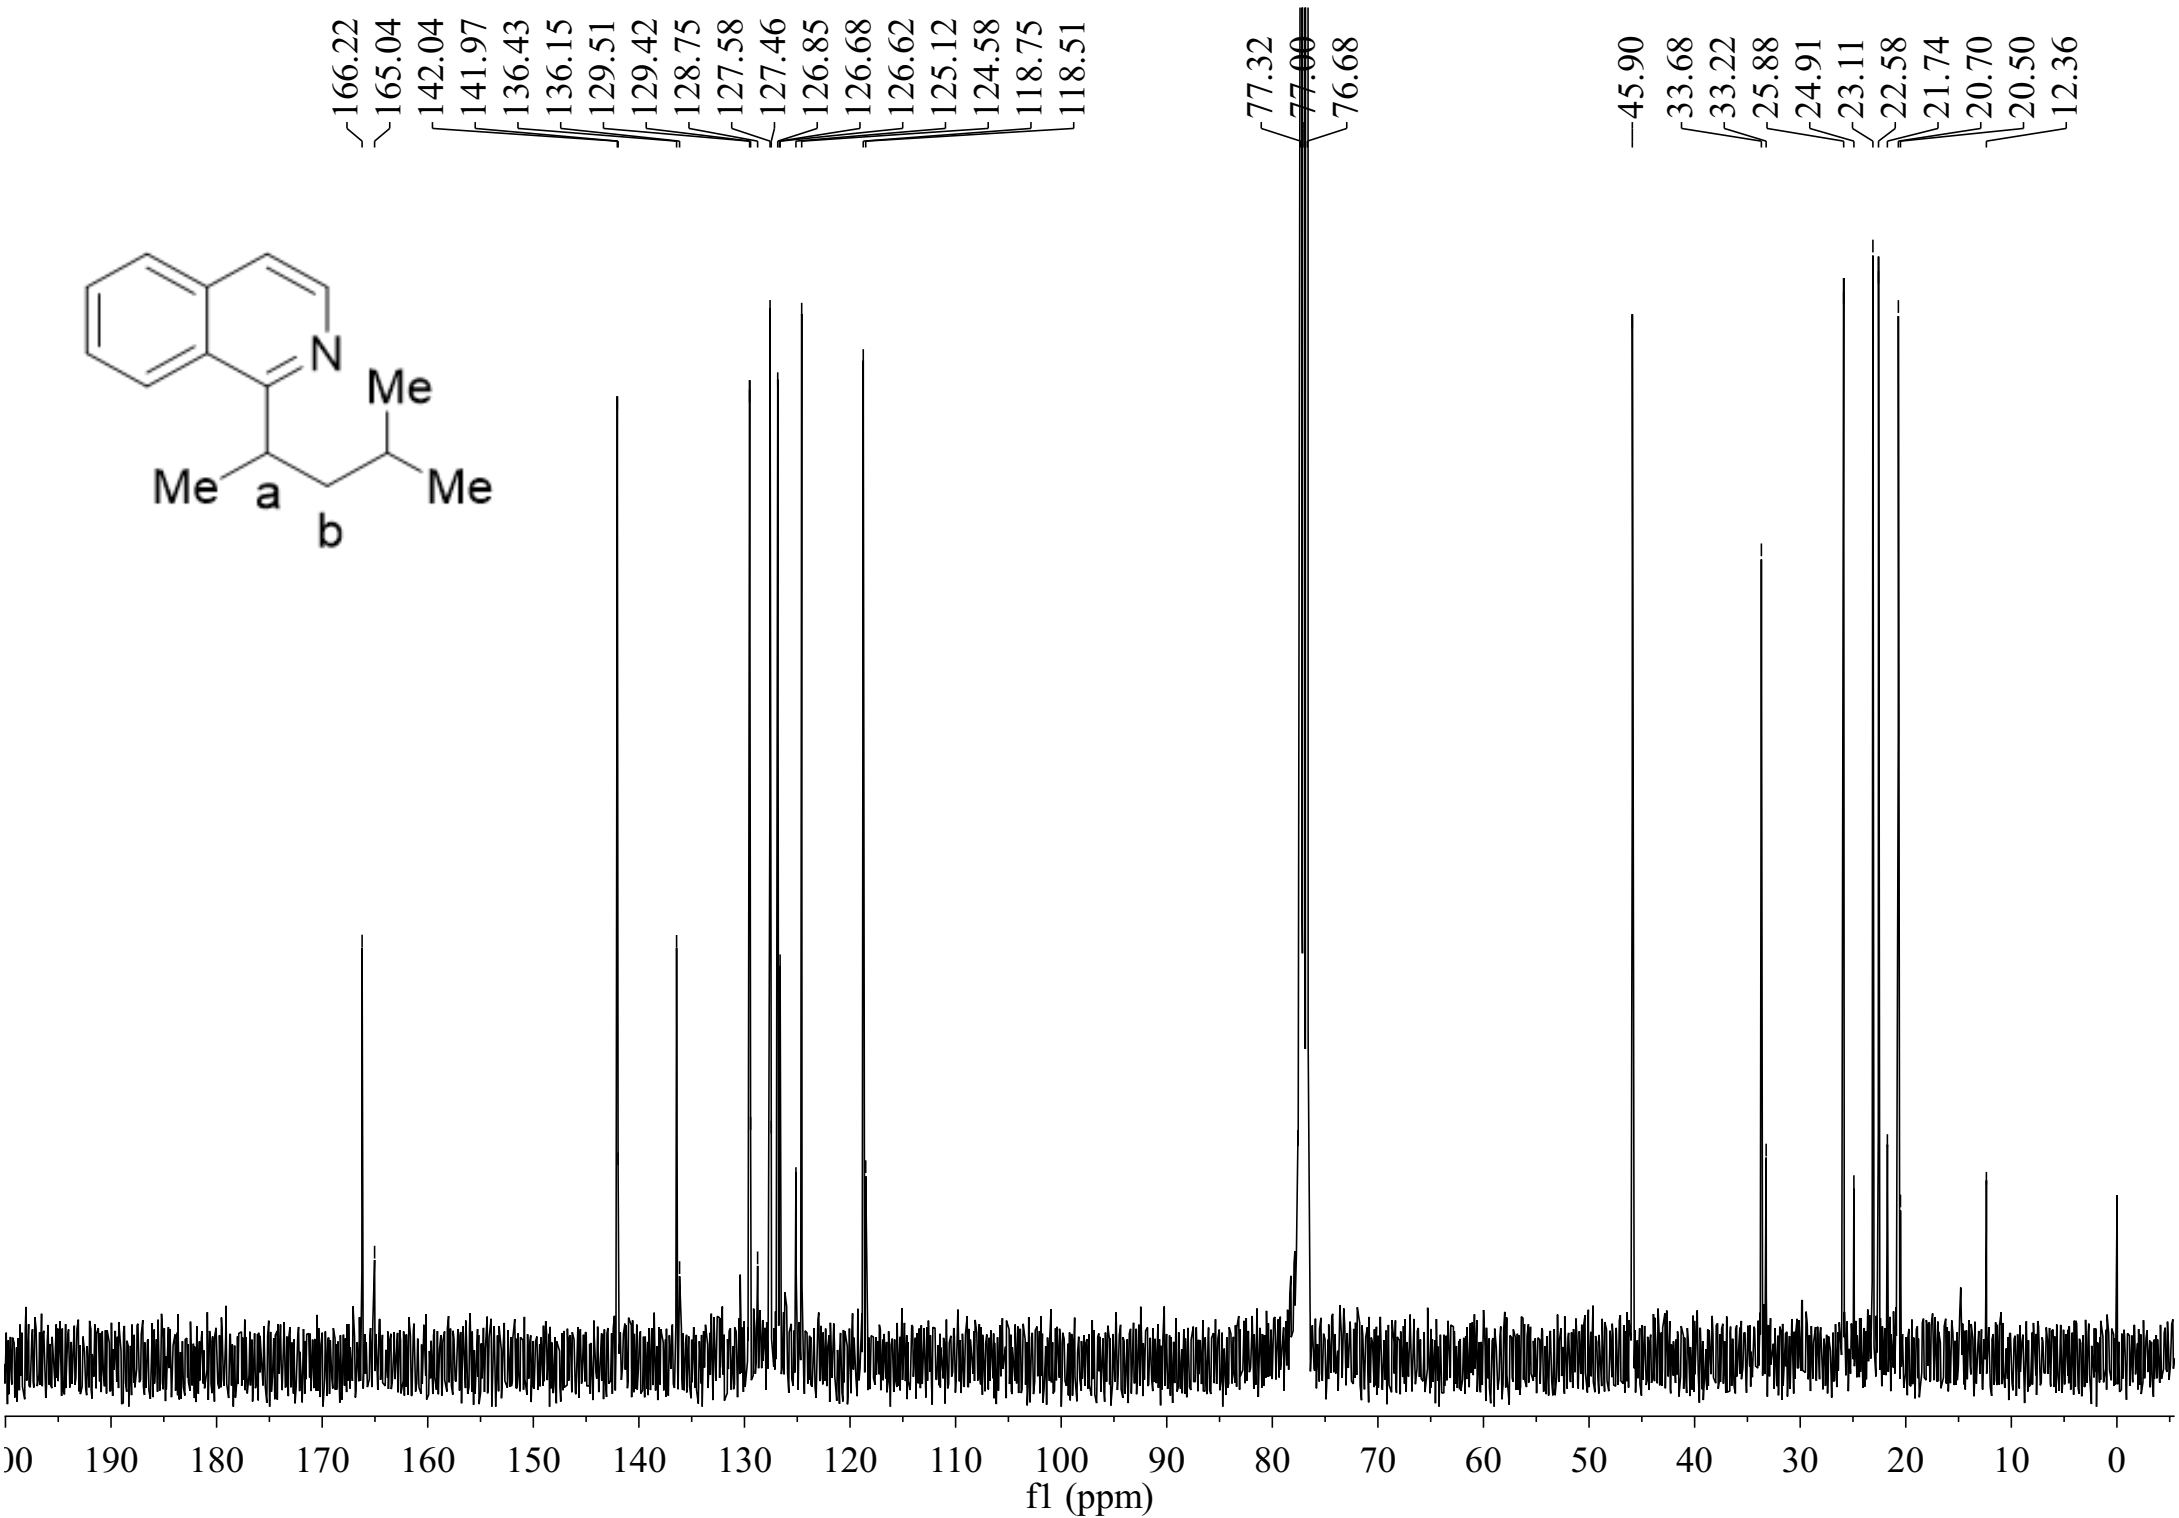

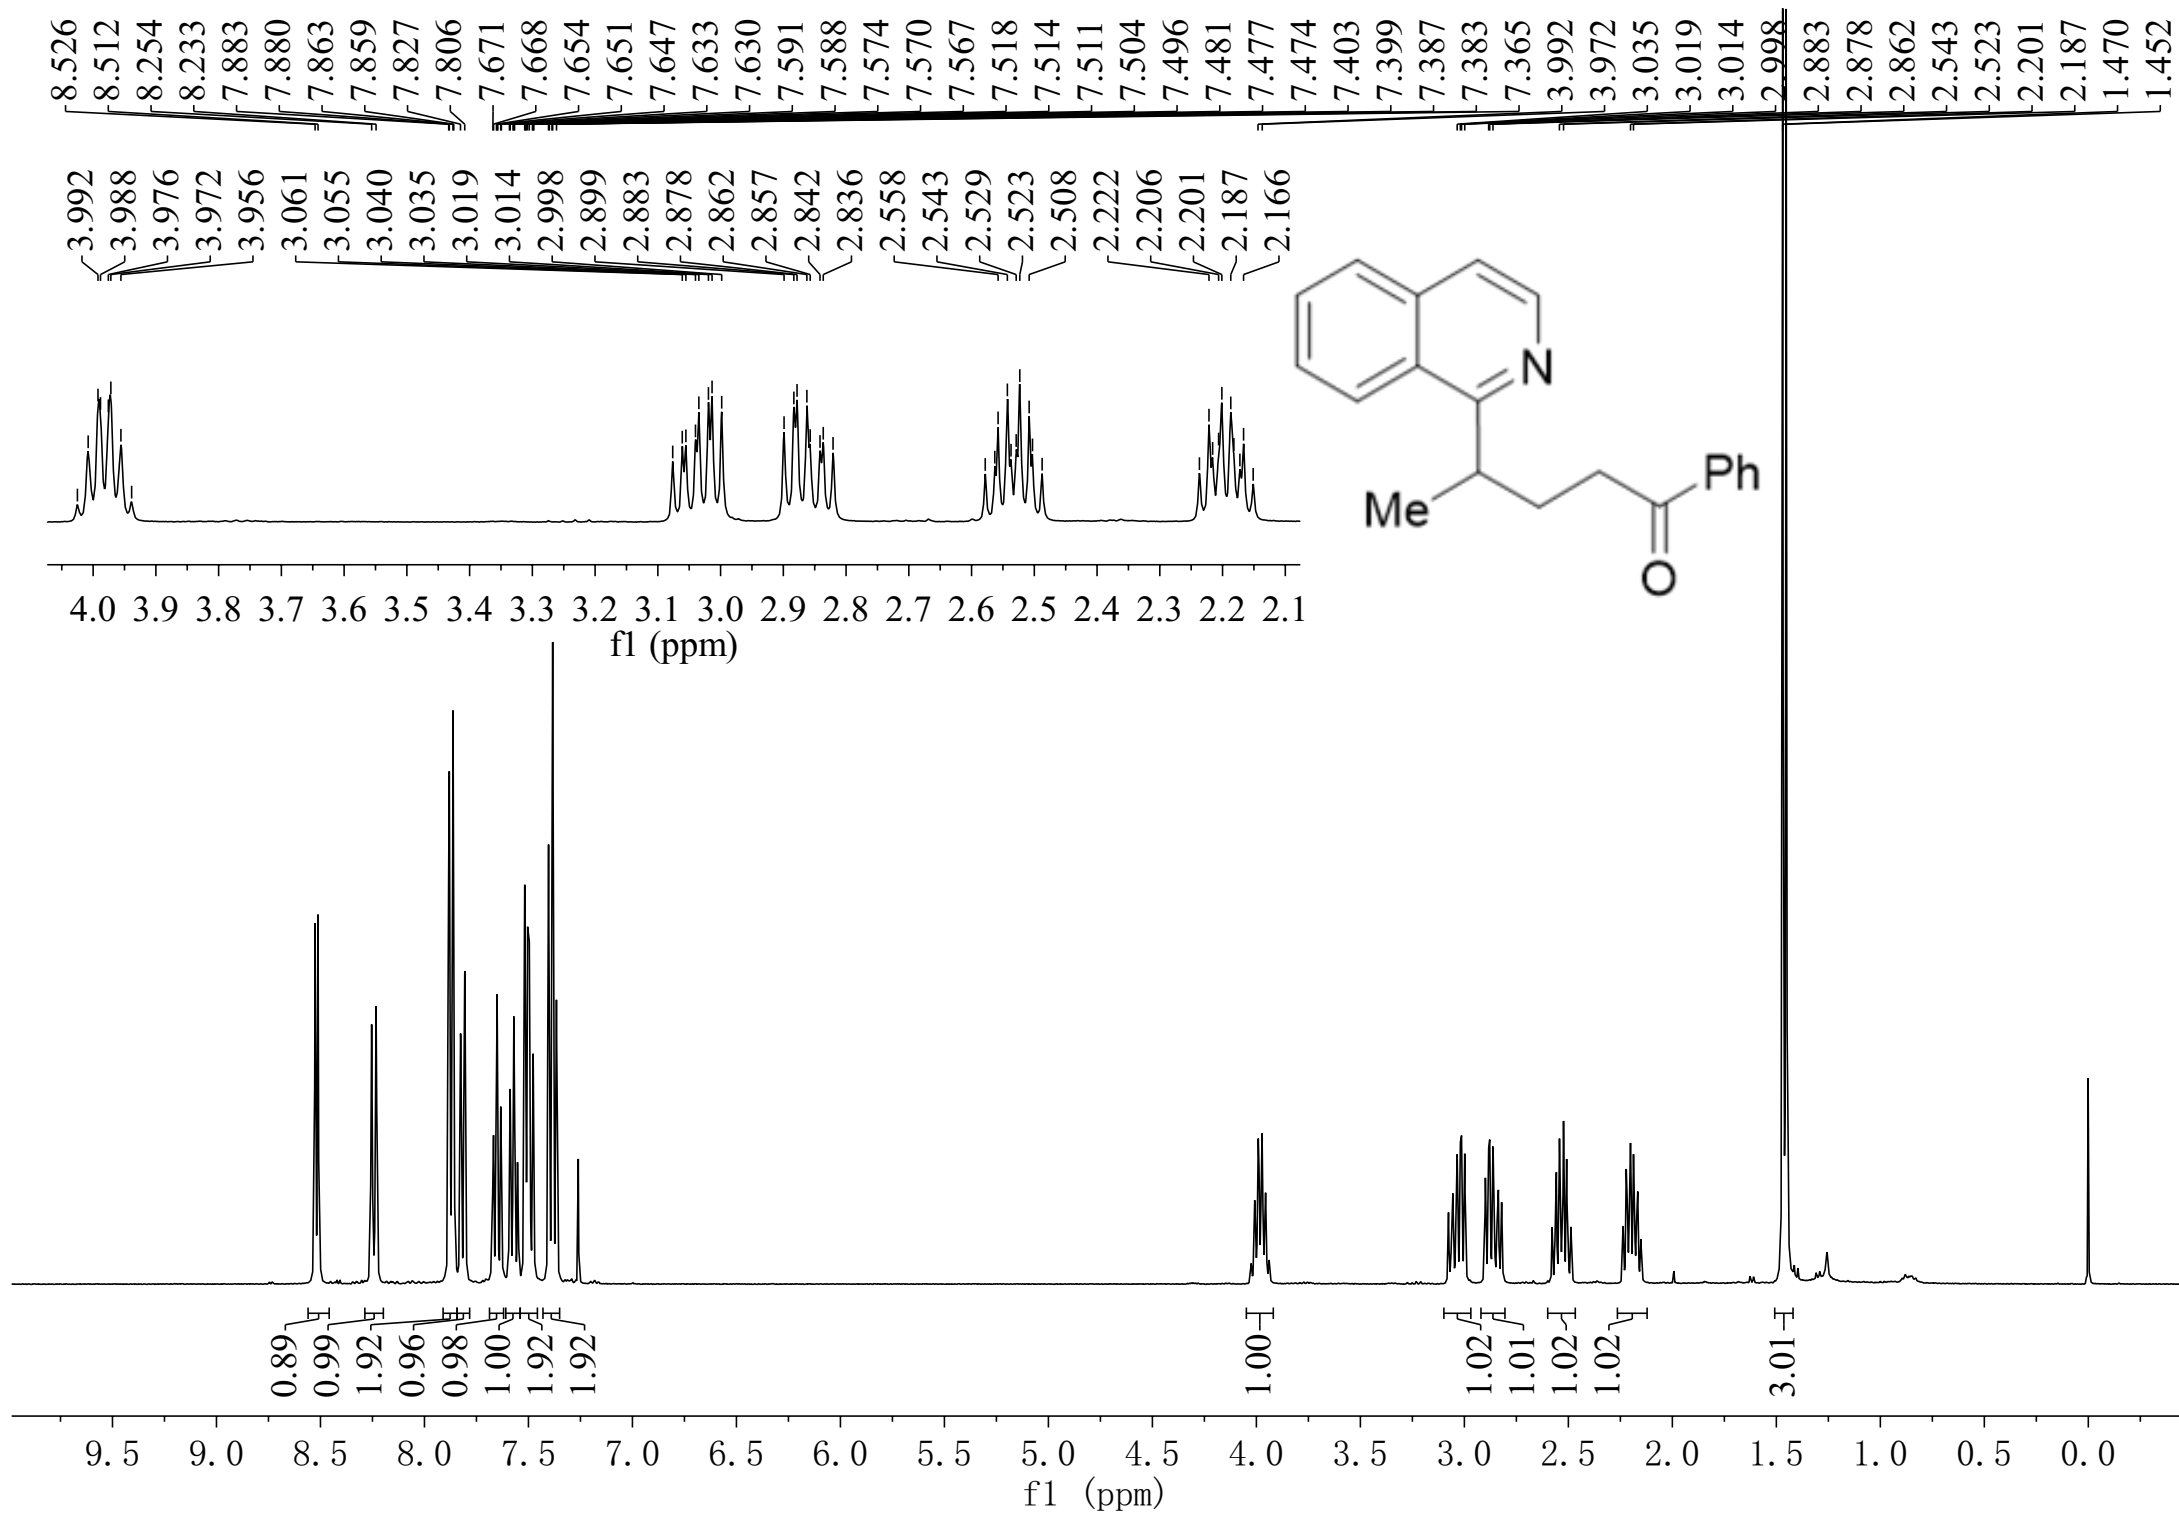

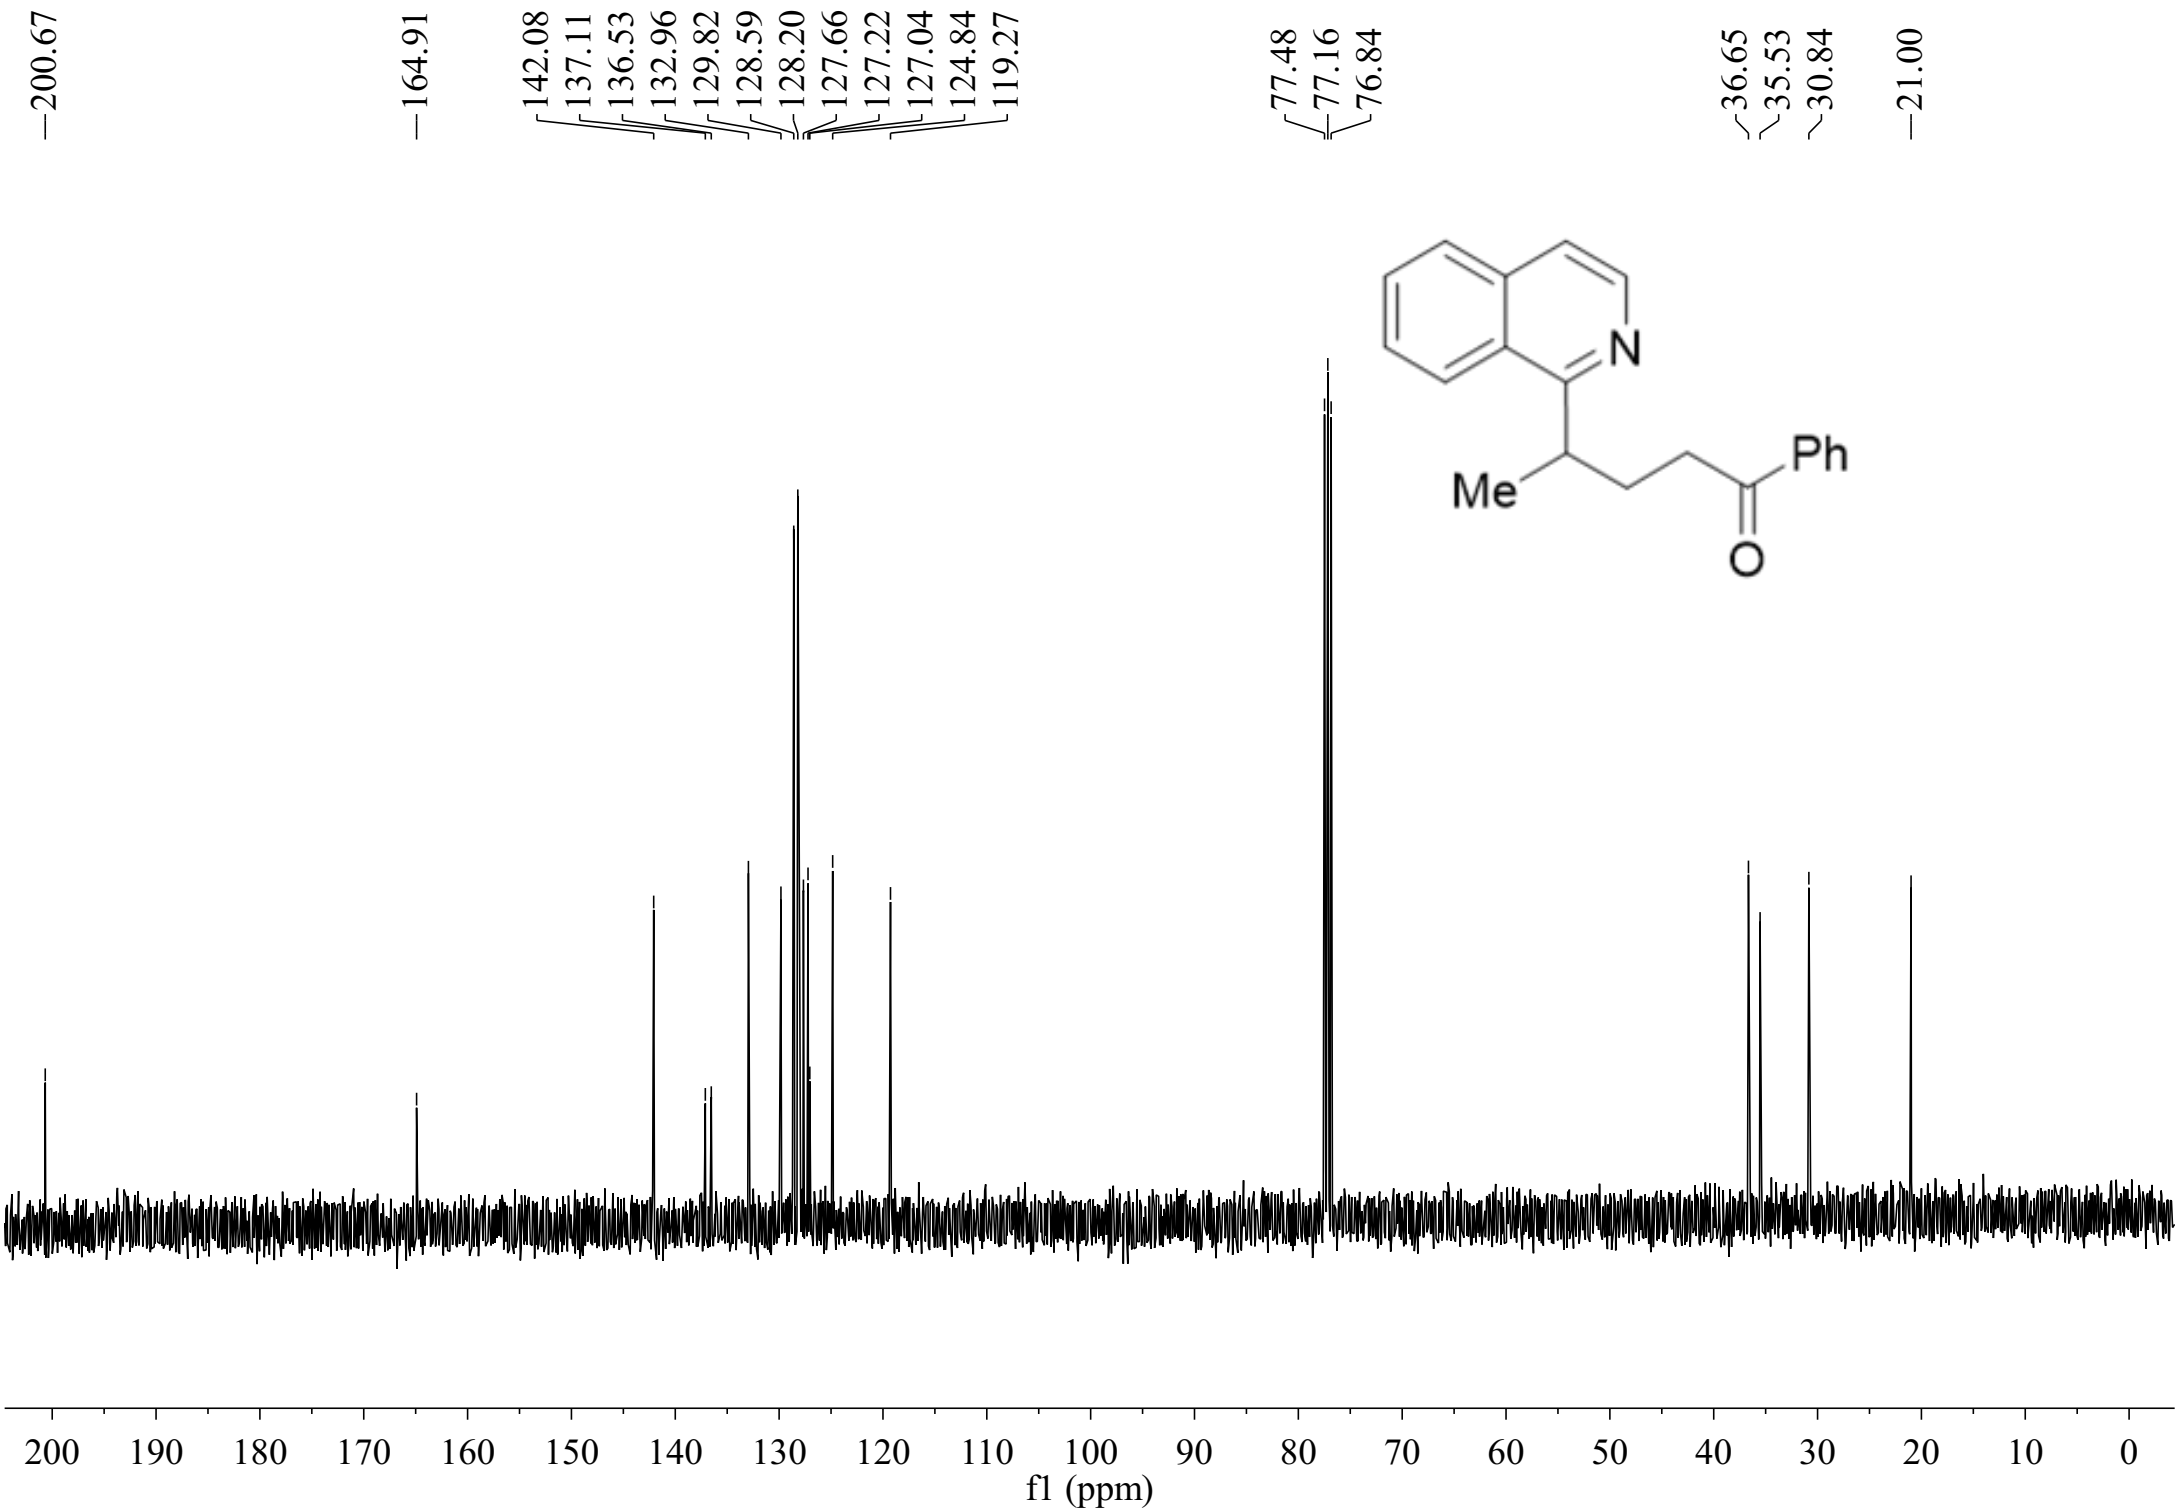

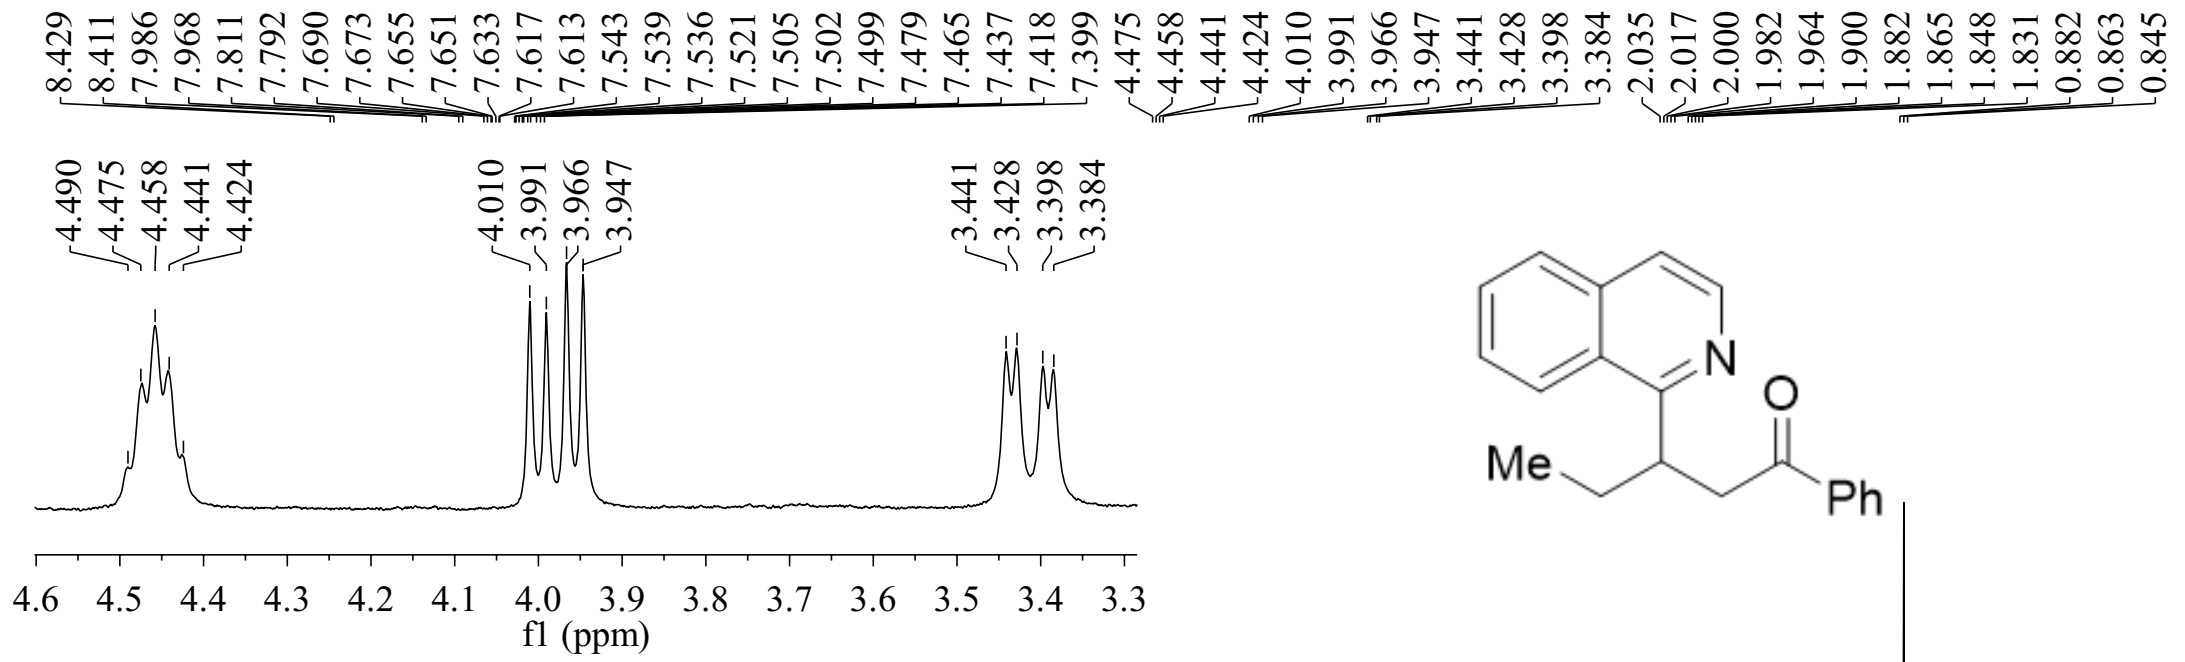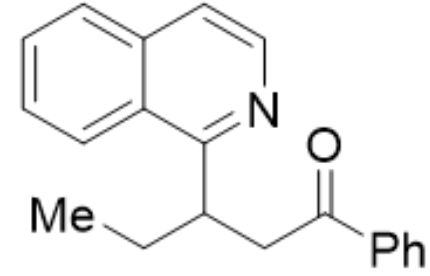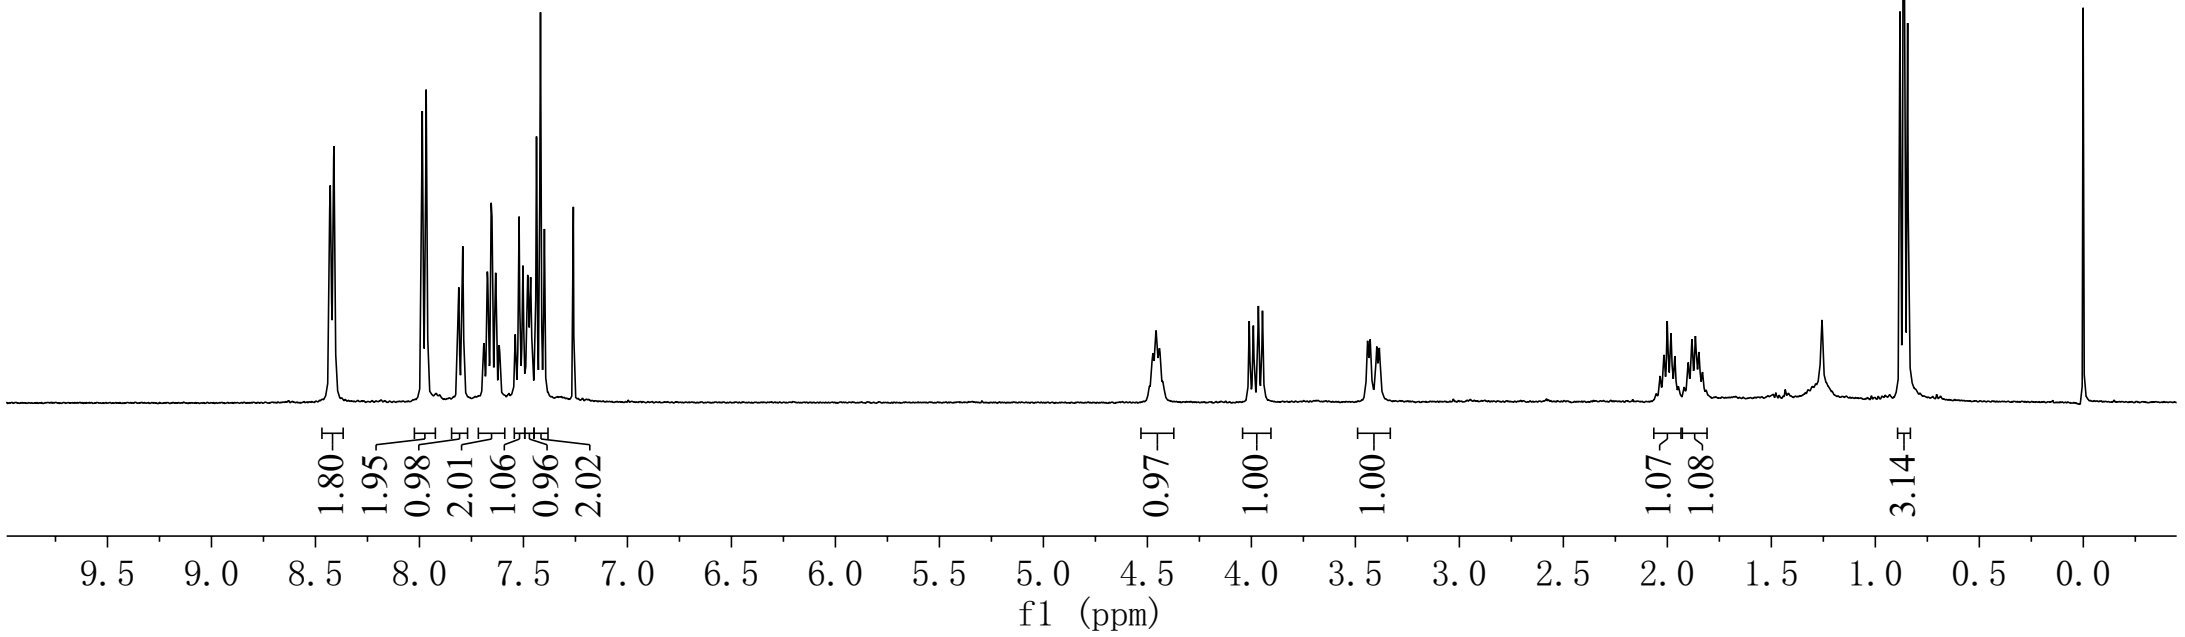

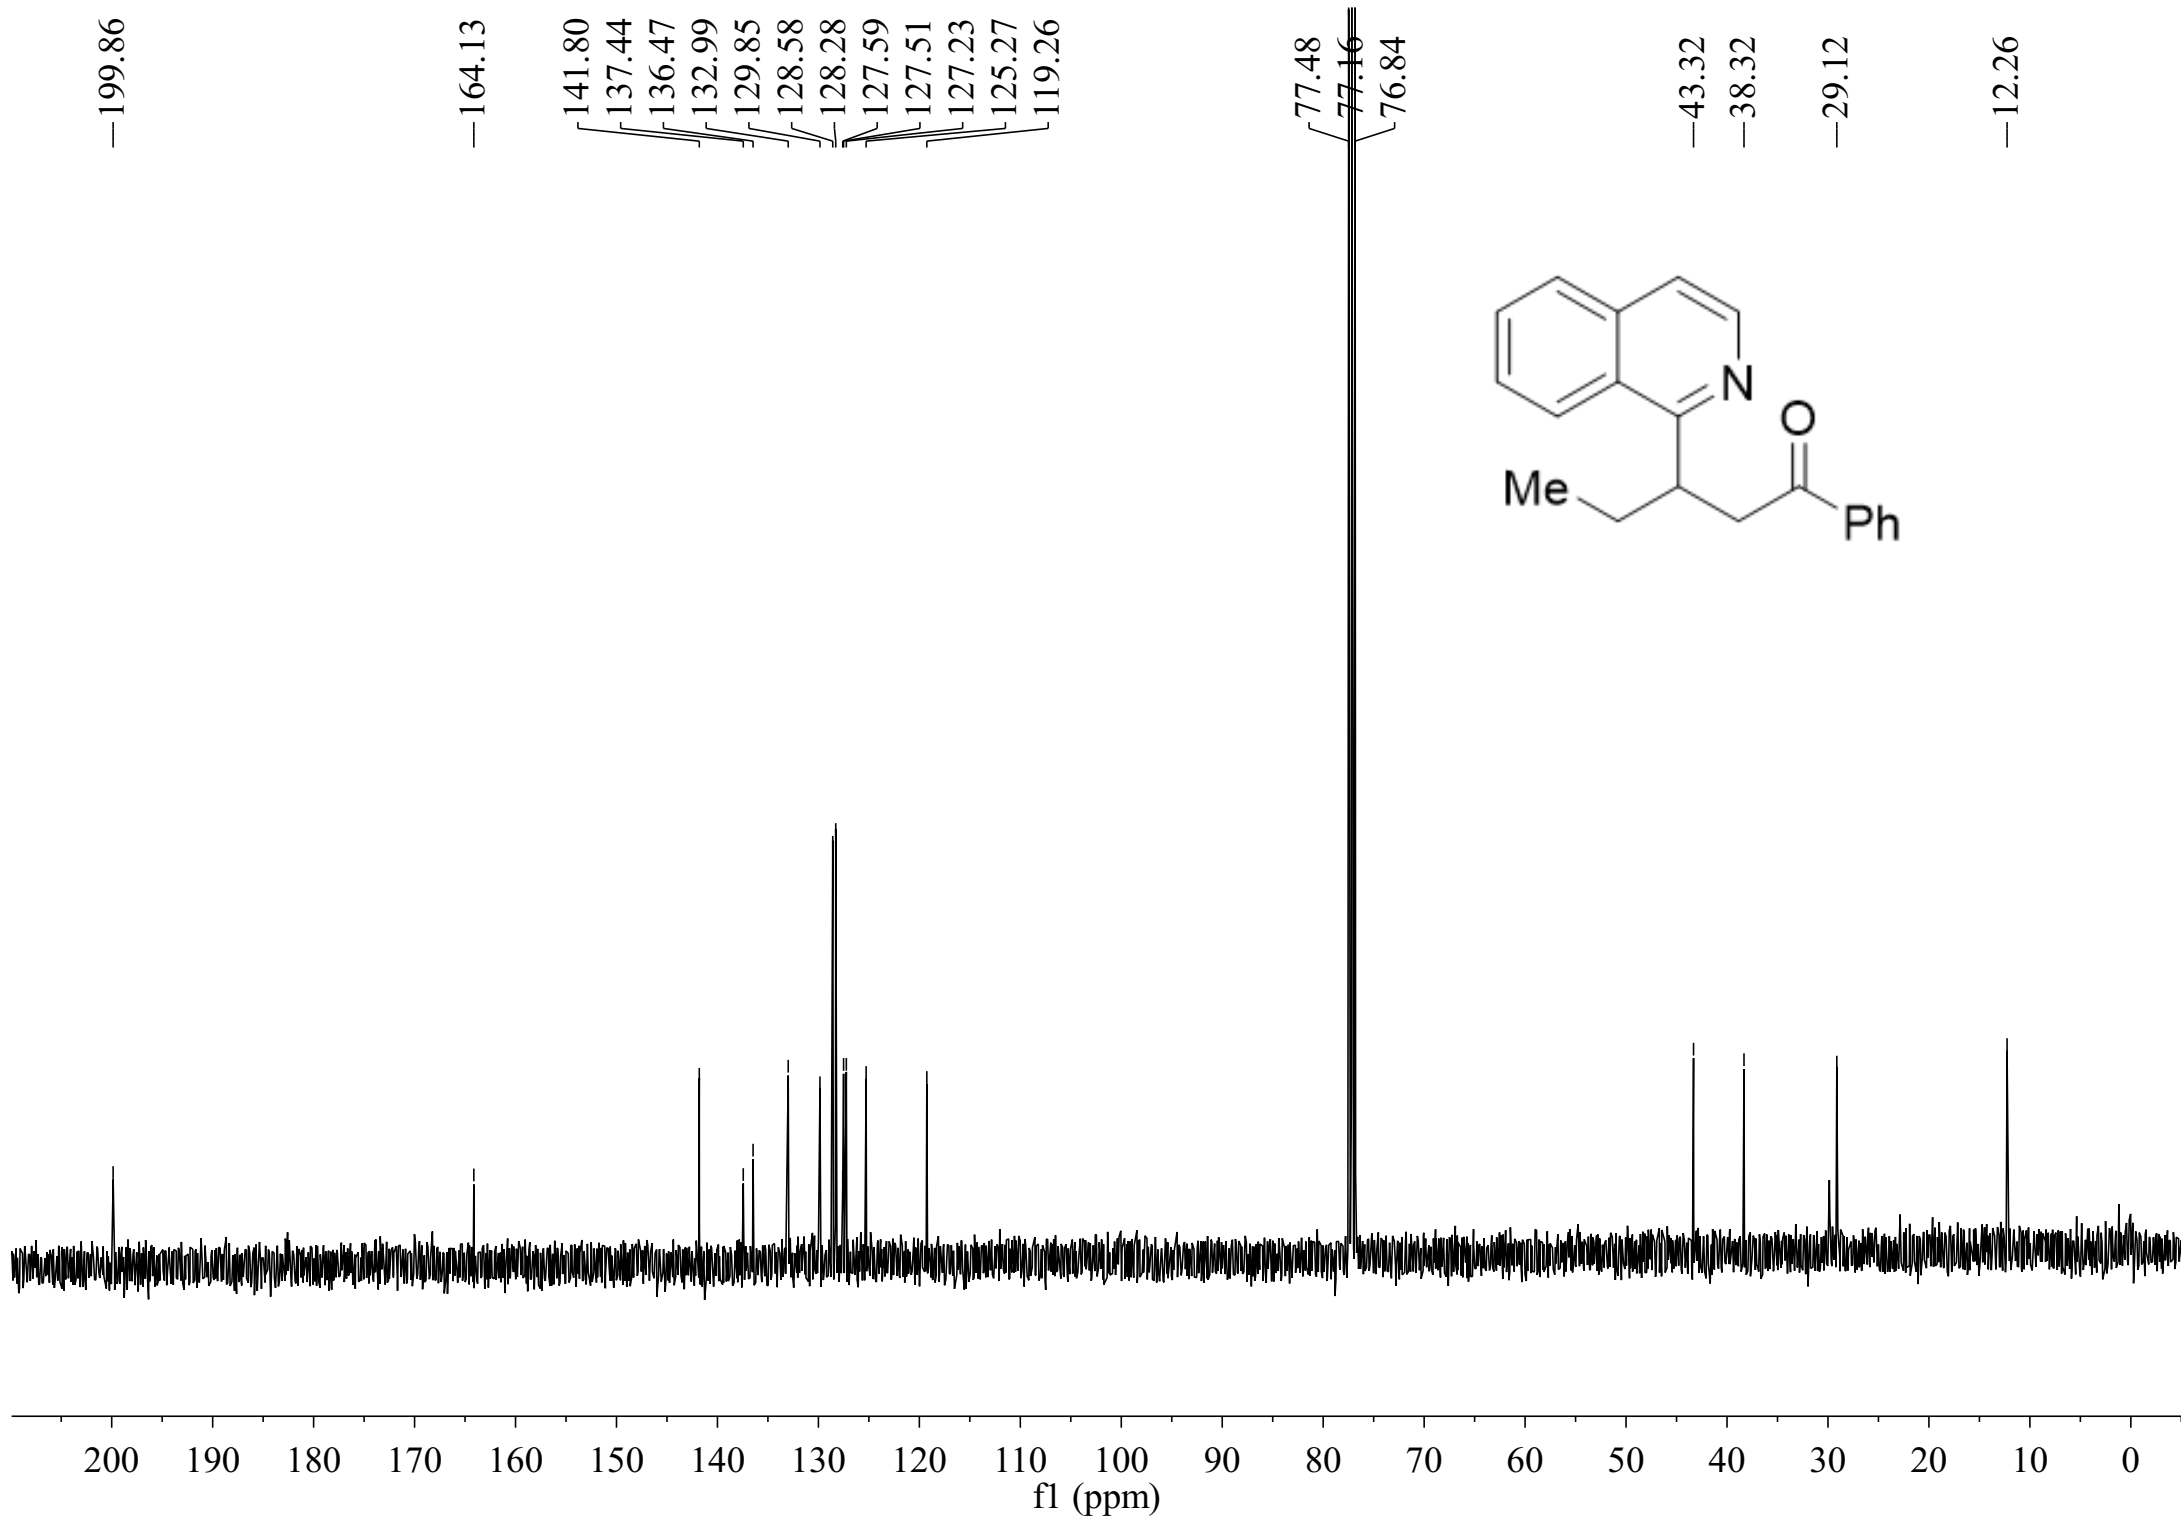

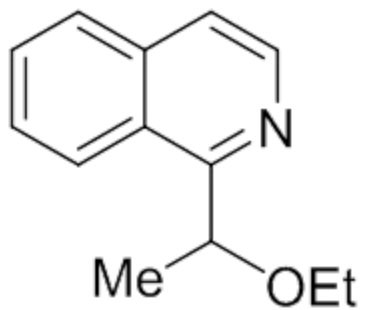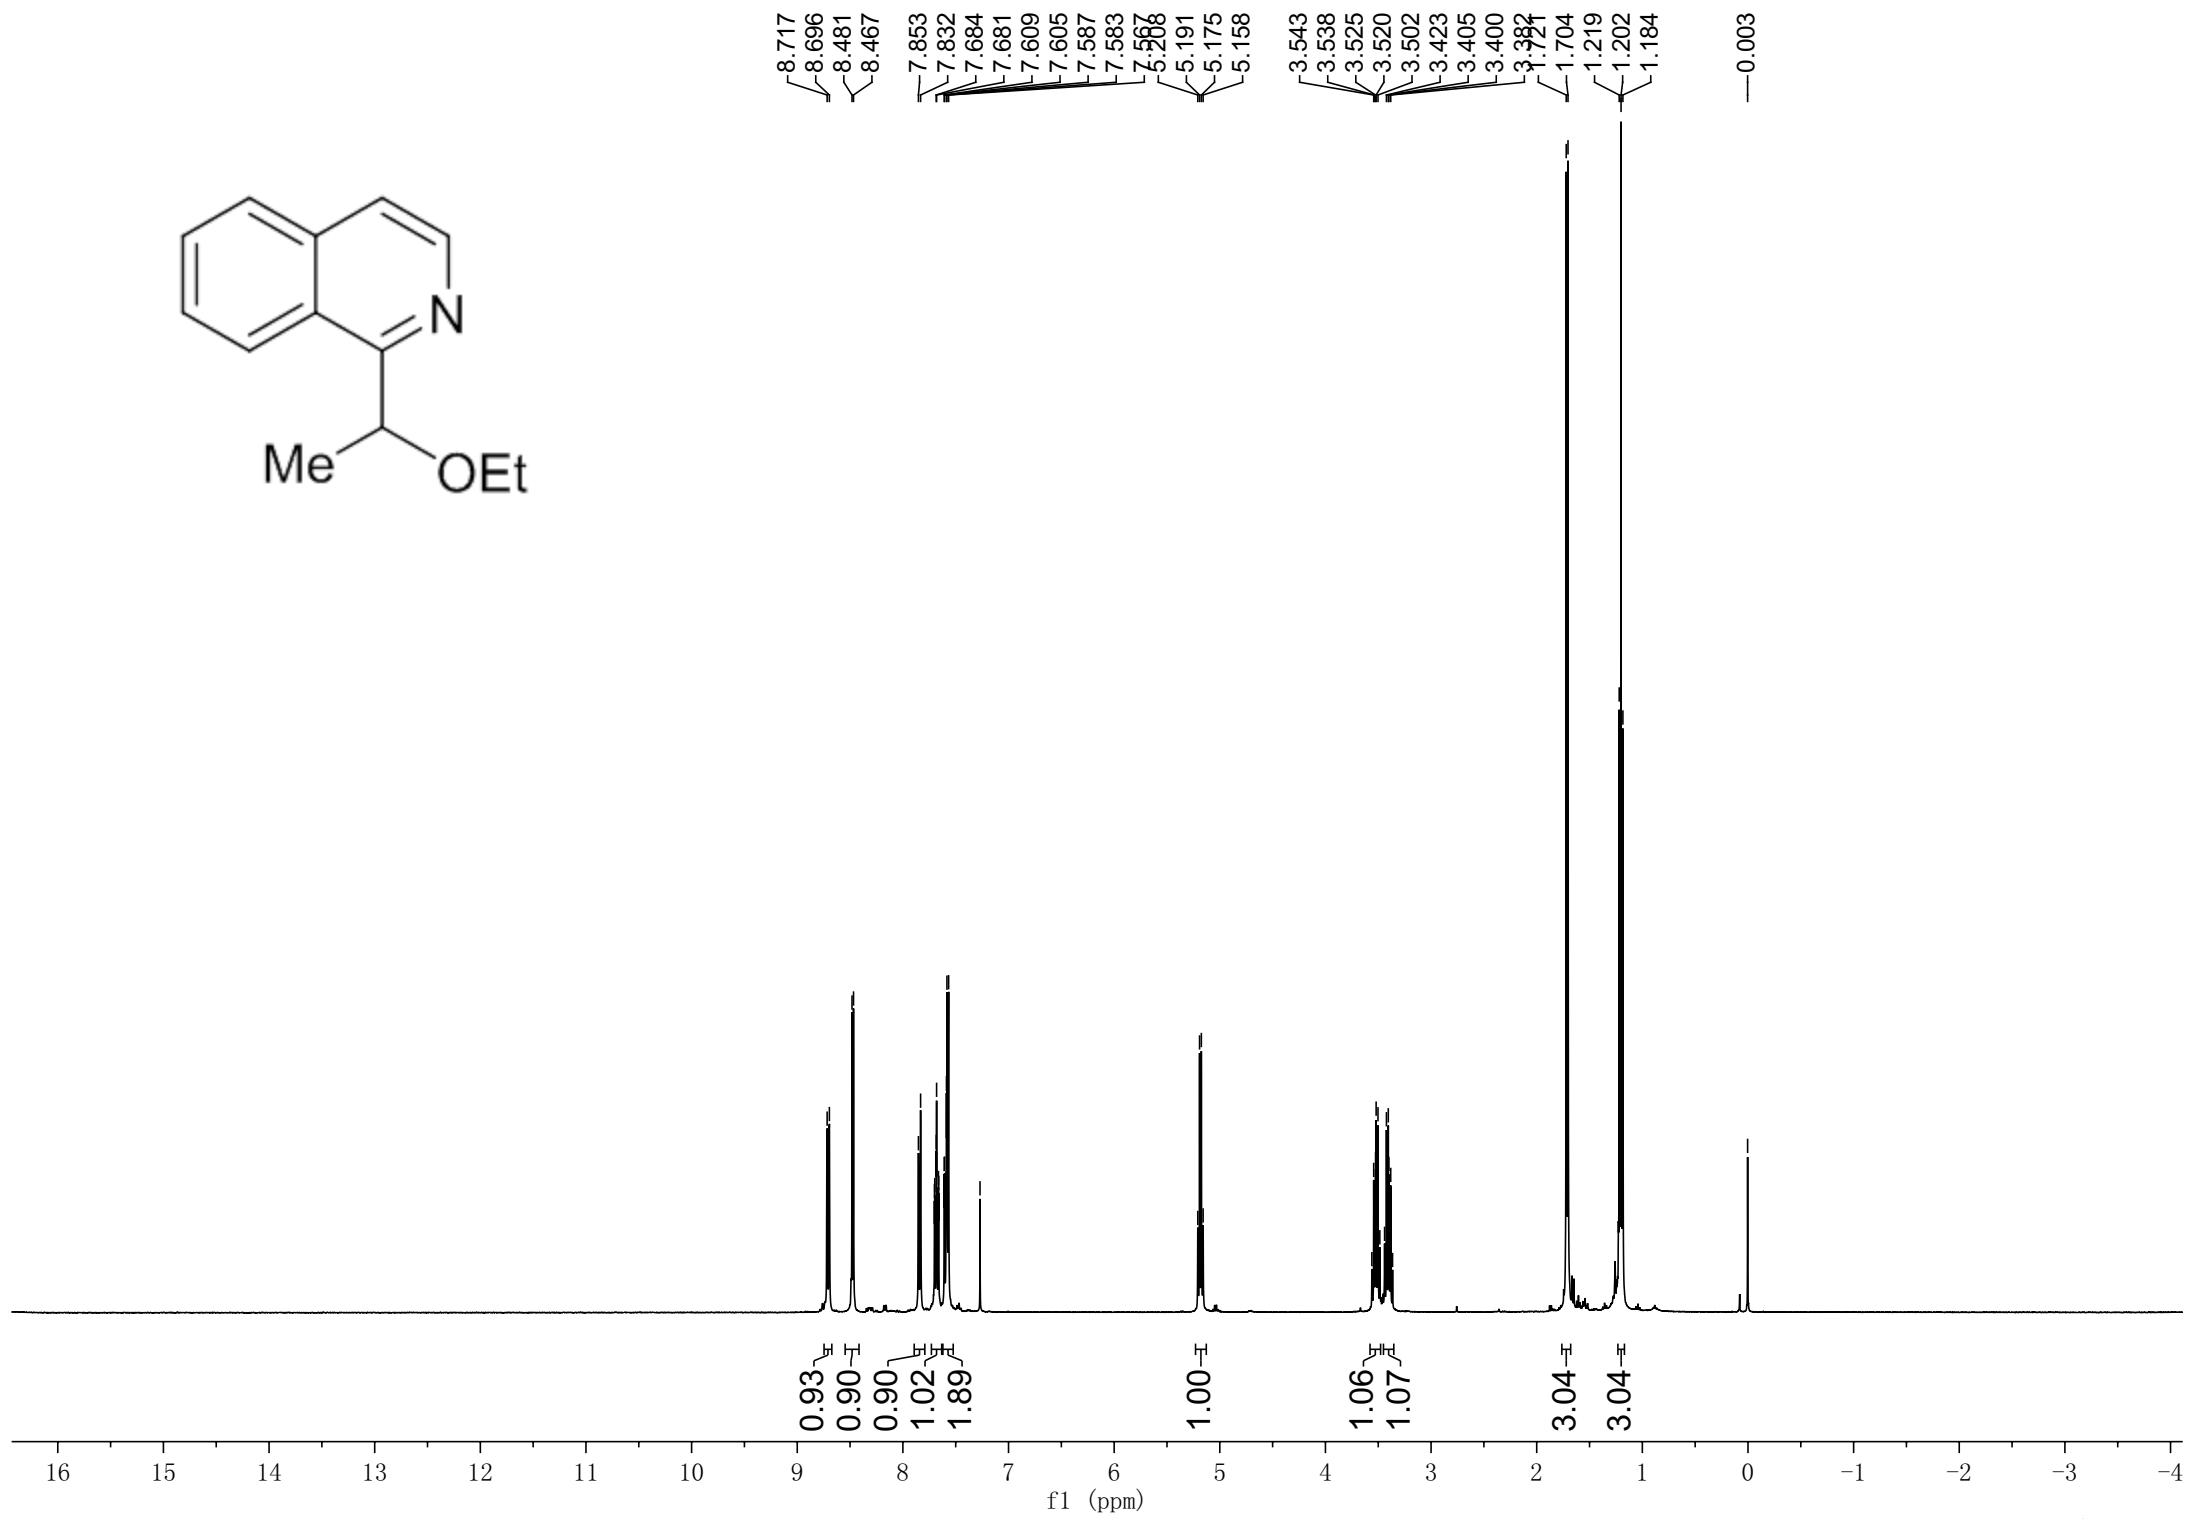



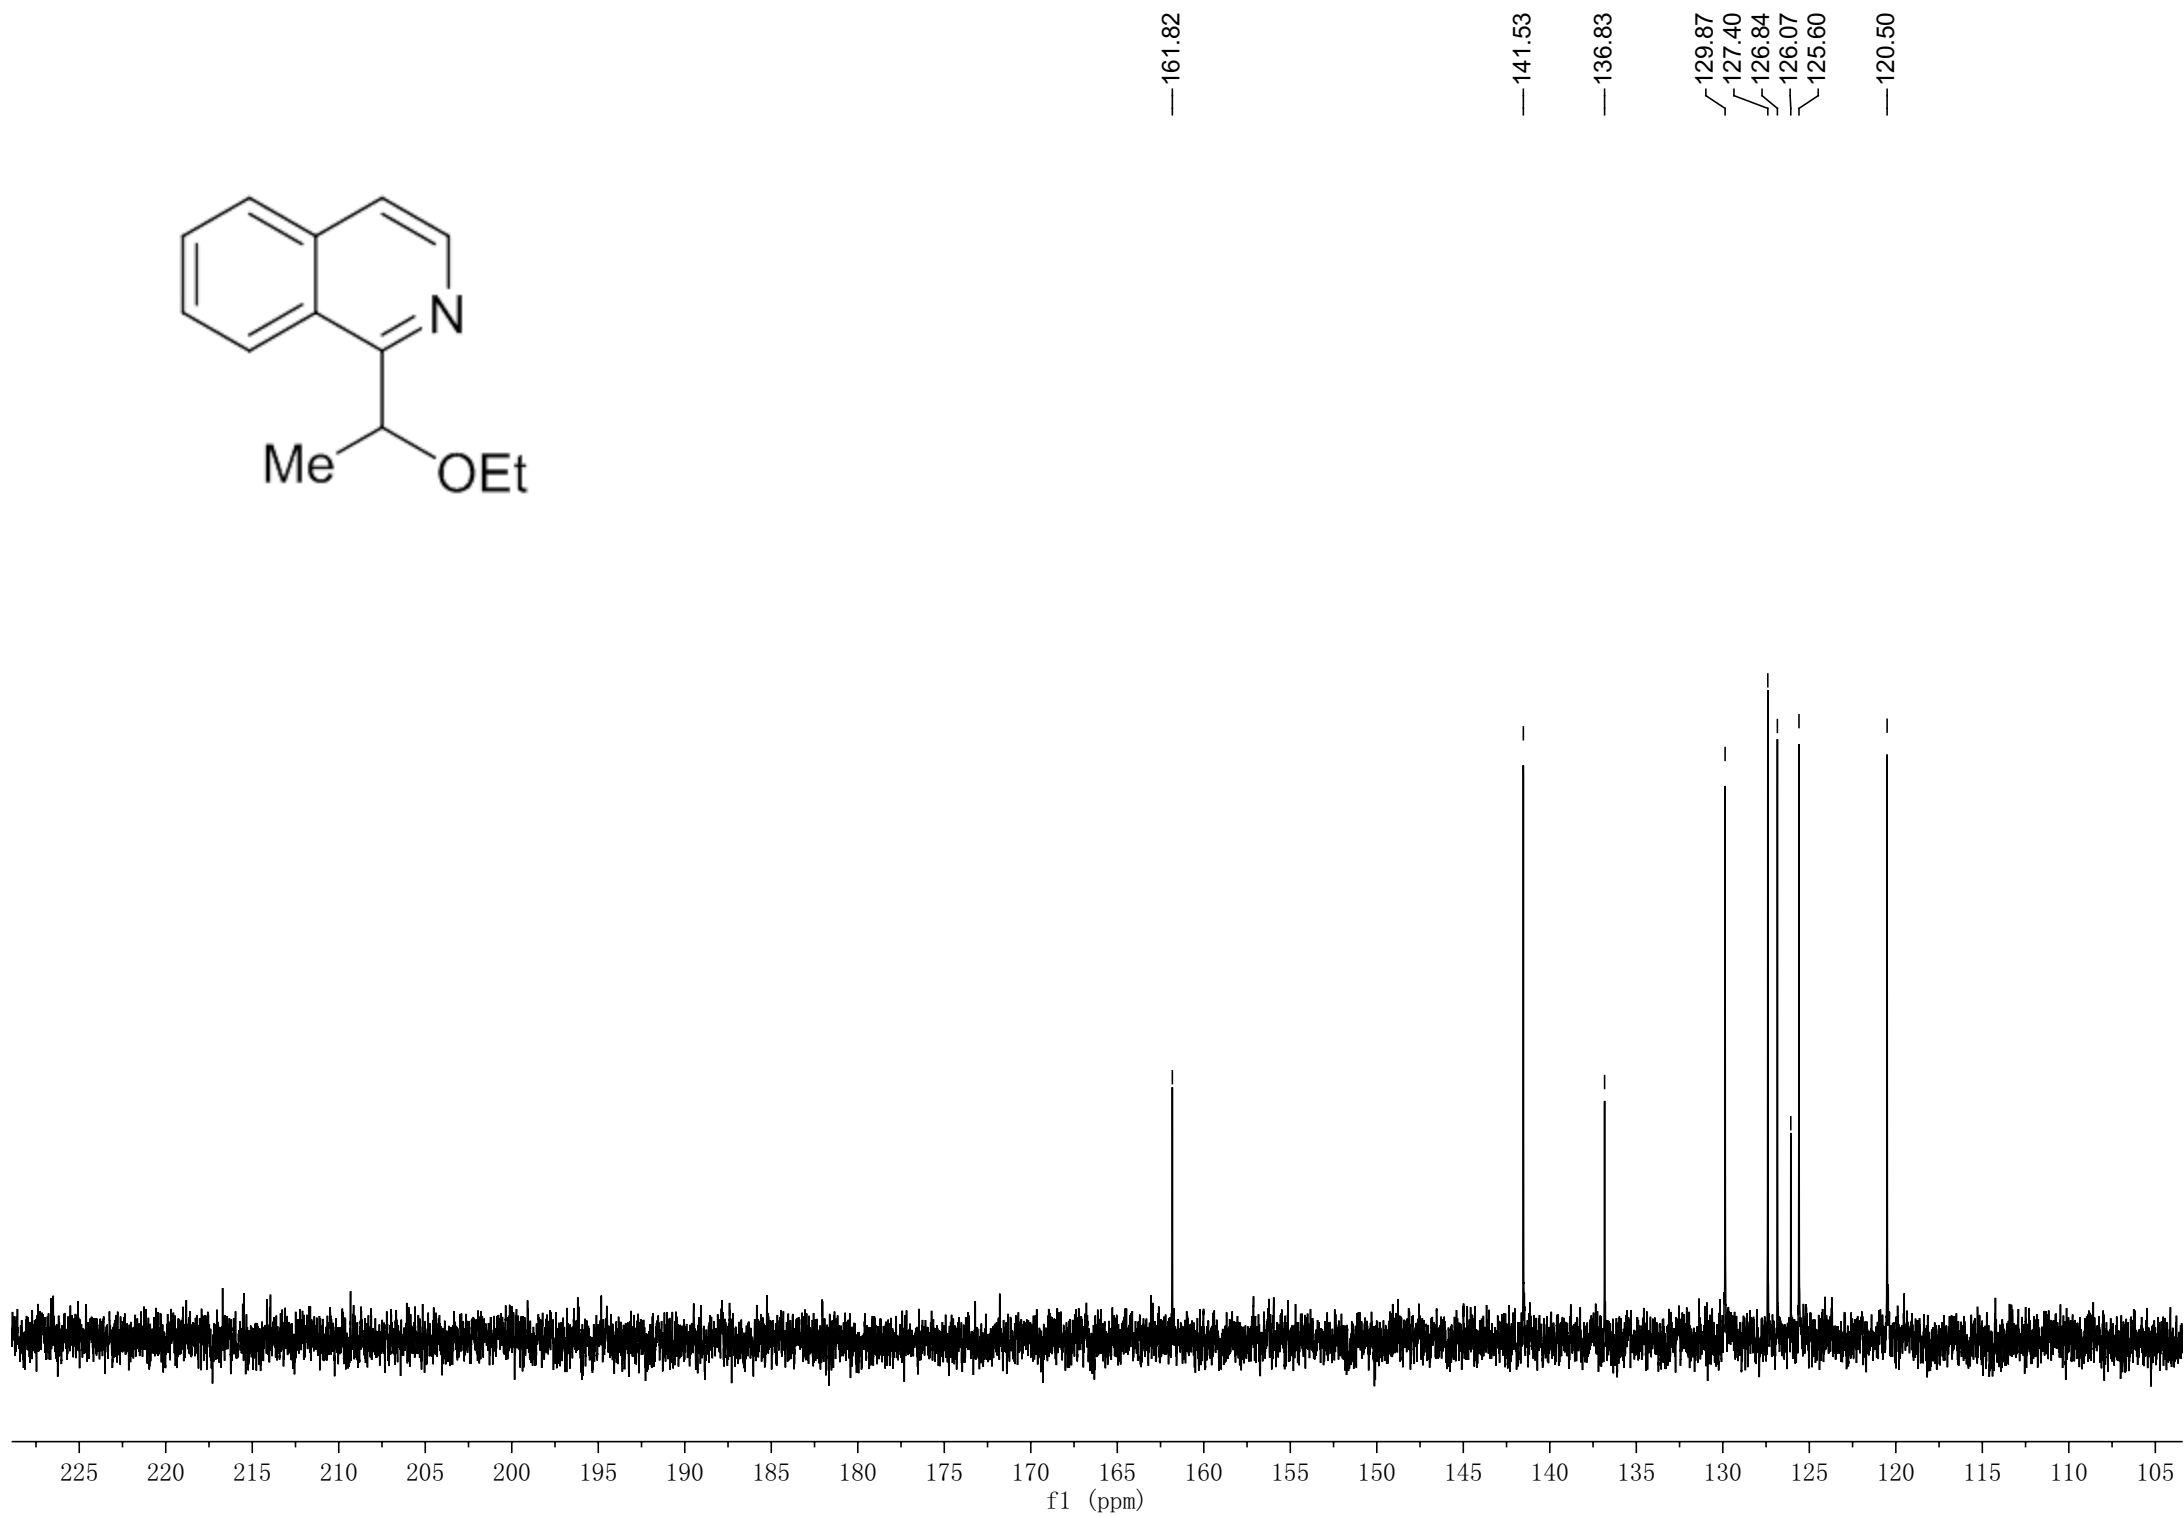

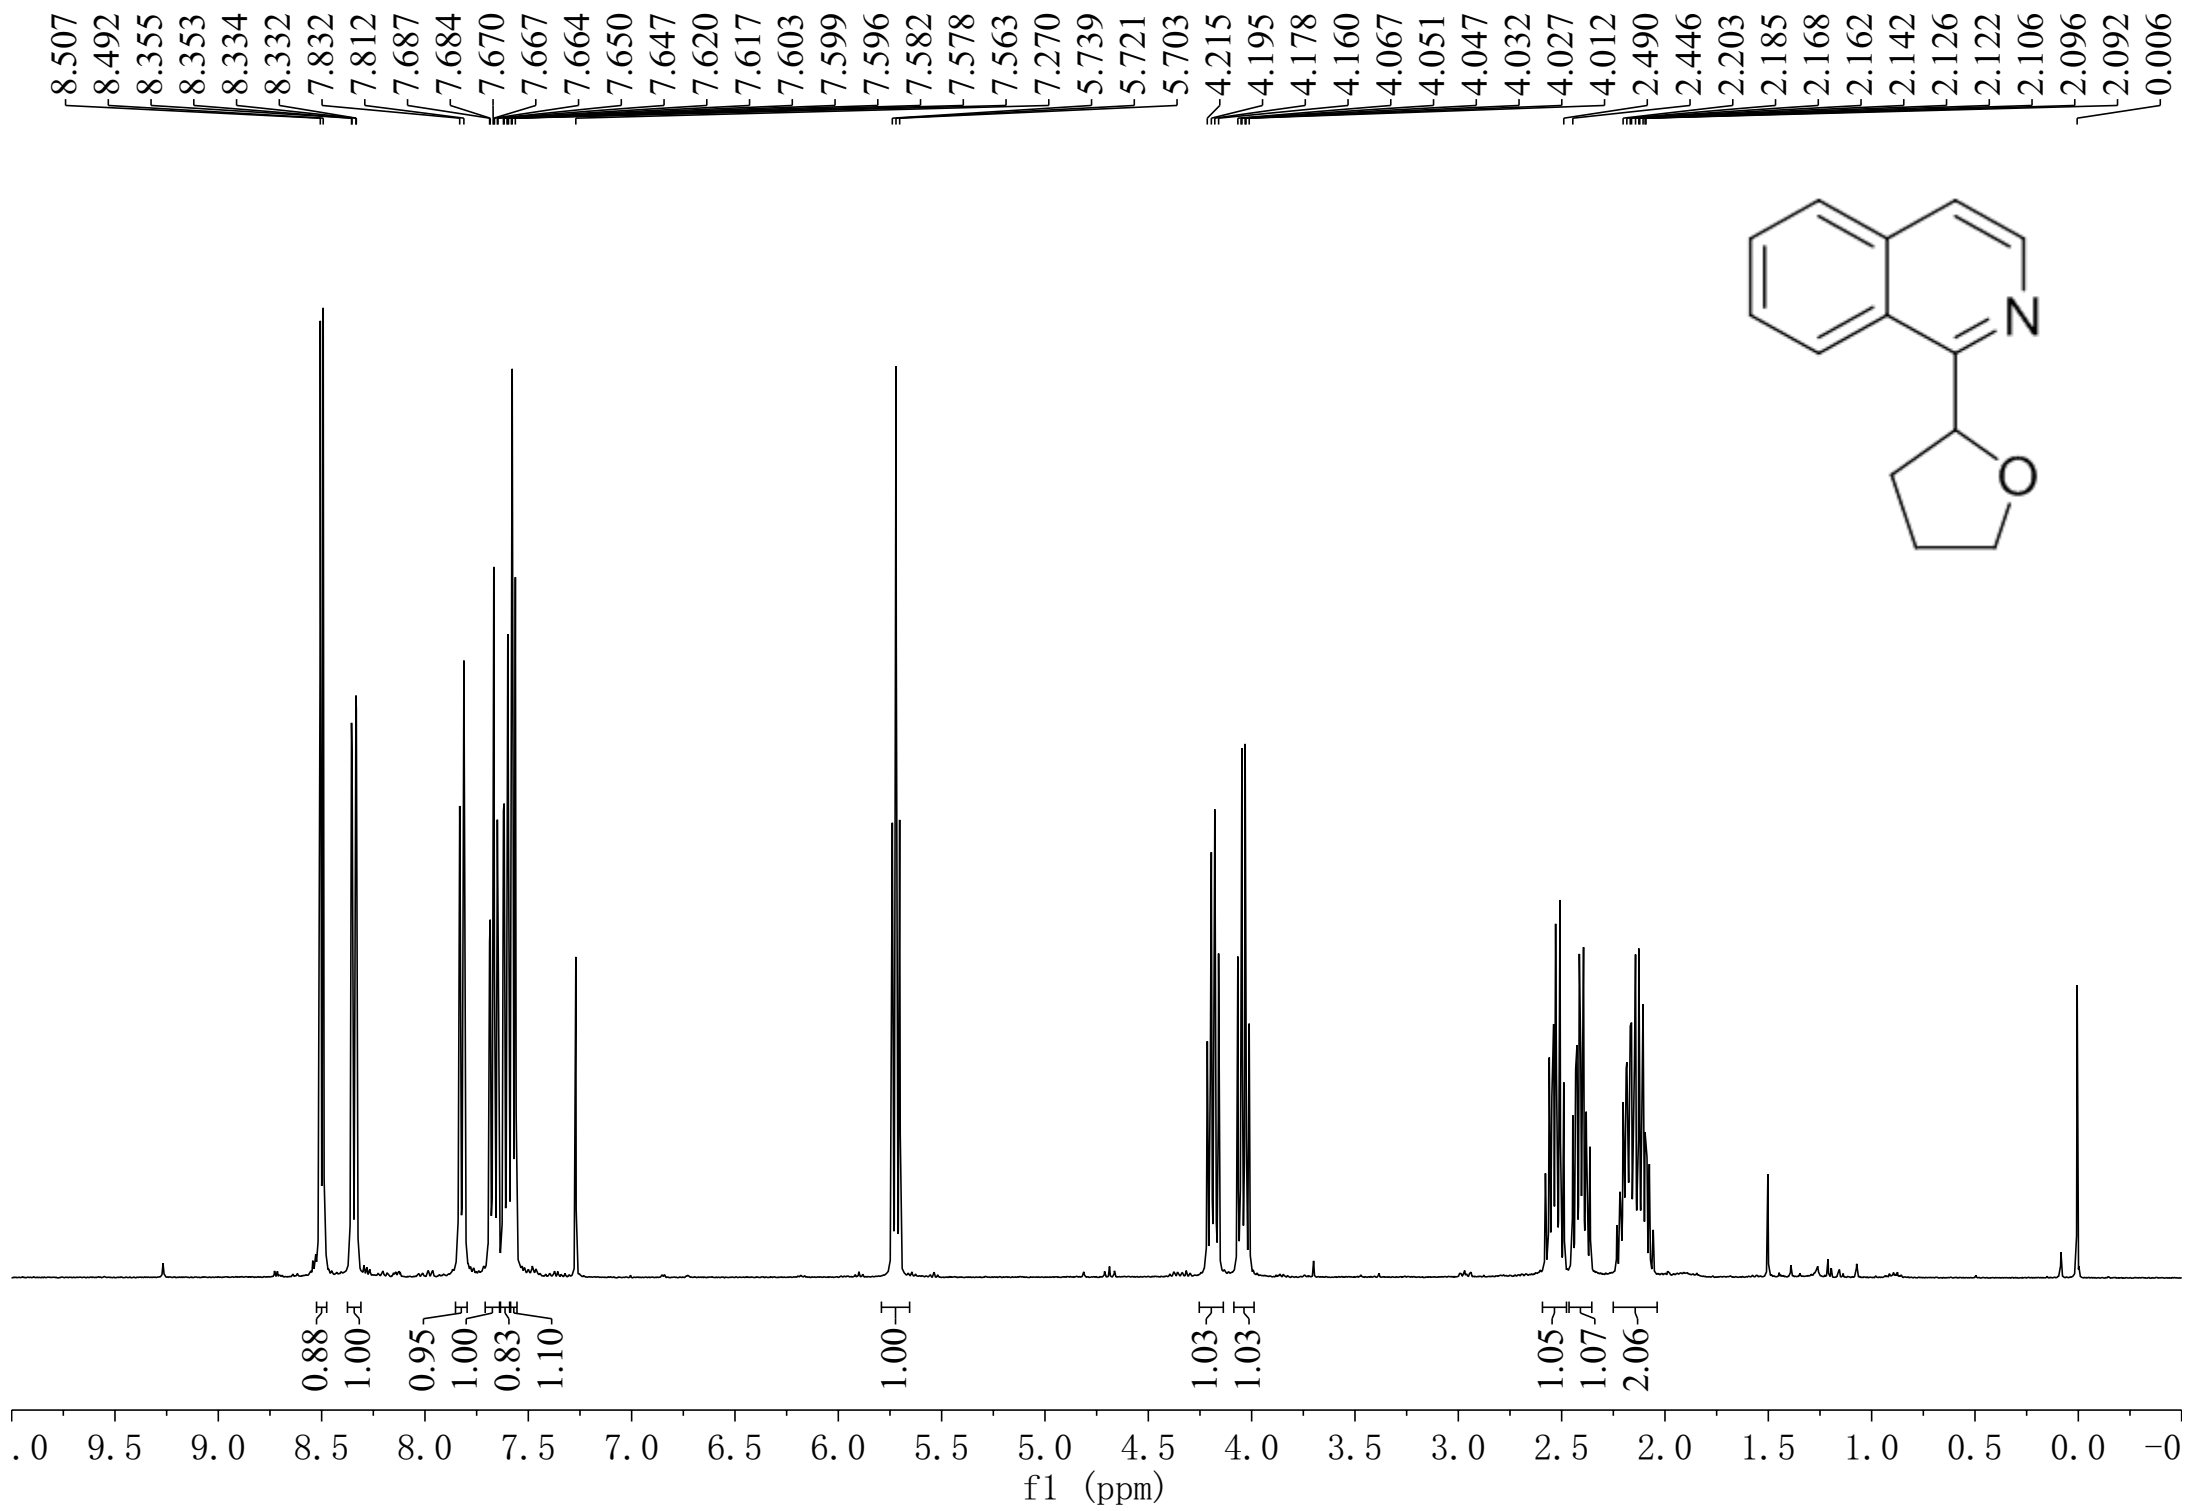

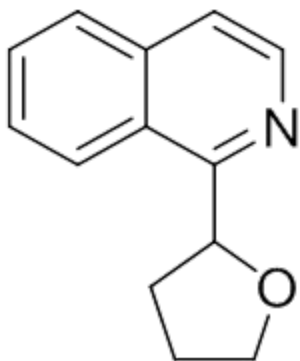

159.56  
141.56  
136.48  
129.74  
127.25  
127.04  
126.58  
125.24  
120.43

79.07  
77.32  
77.00  
76.68  
68.93

30.66  
26.10

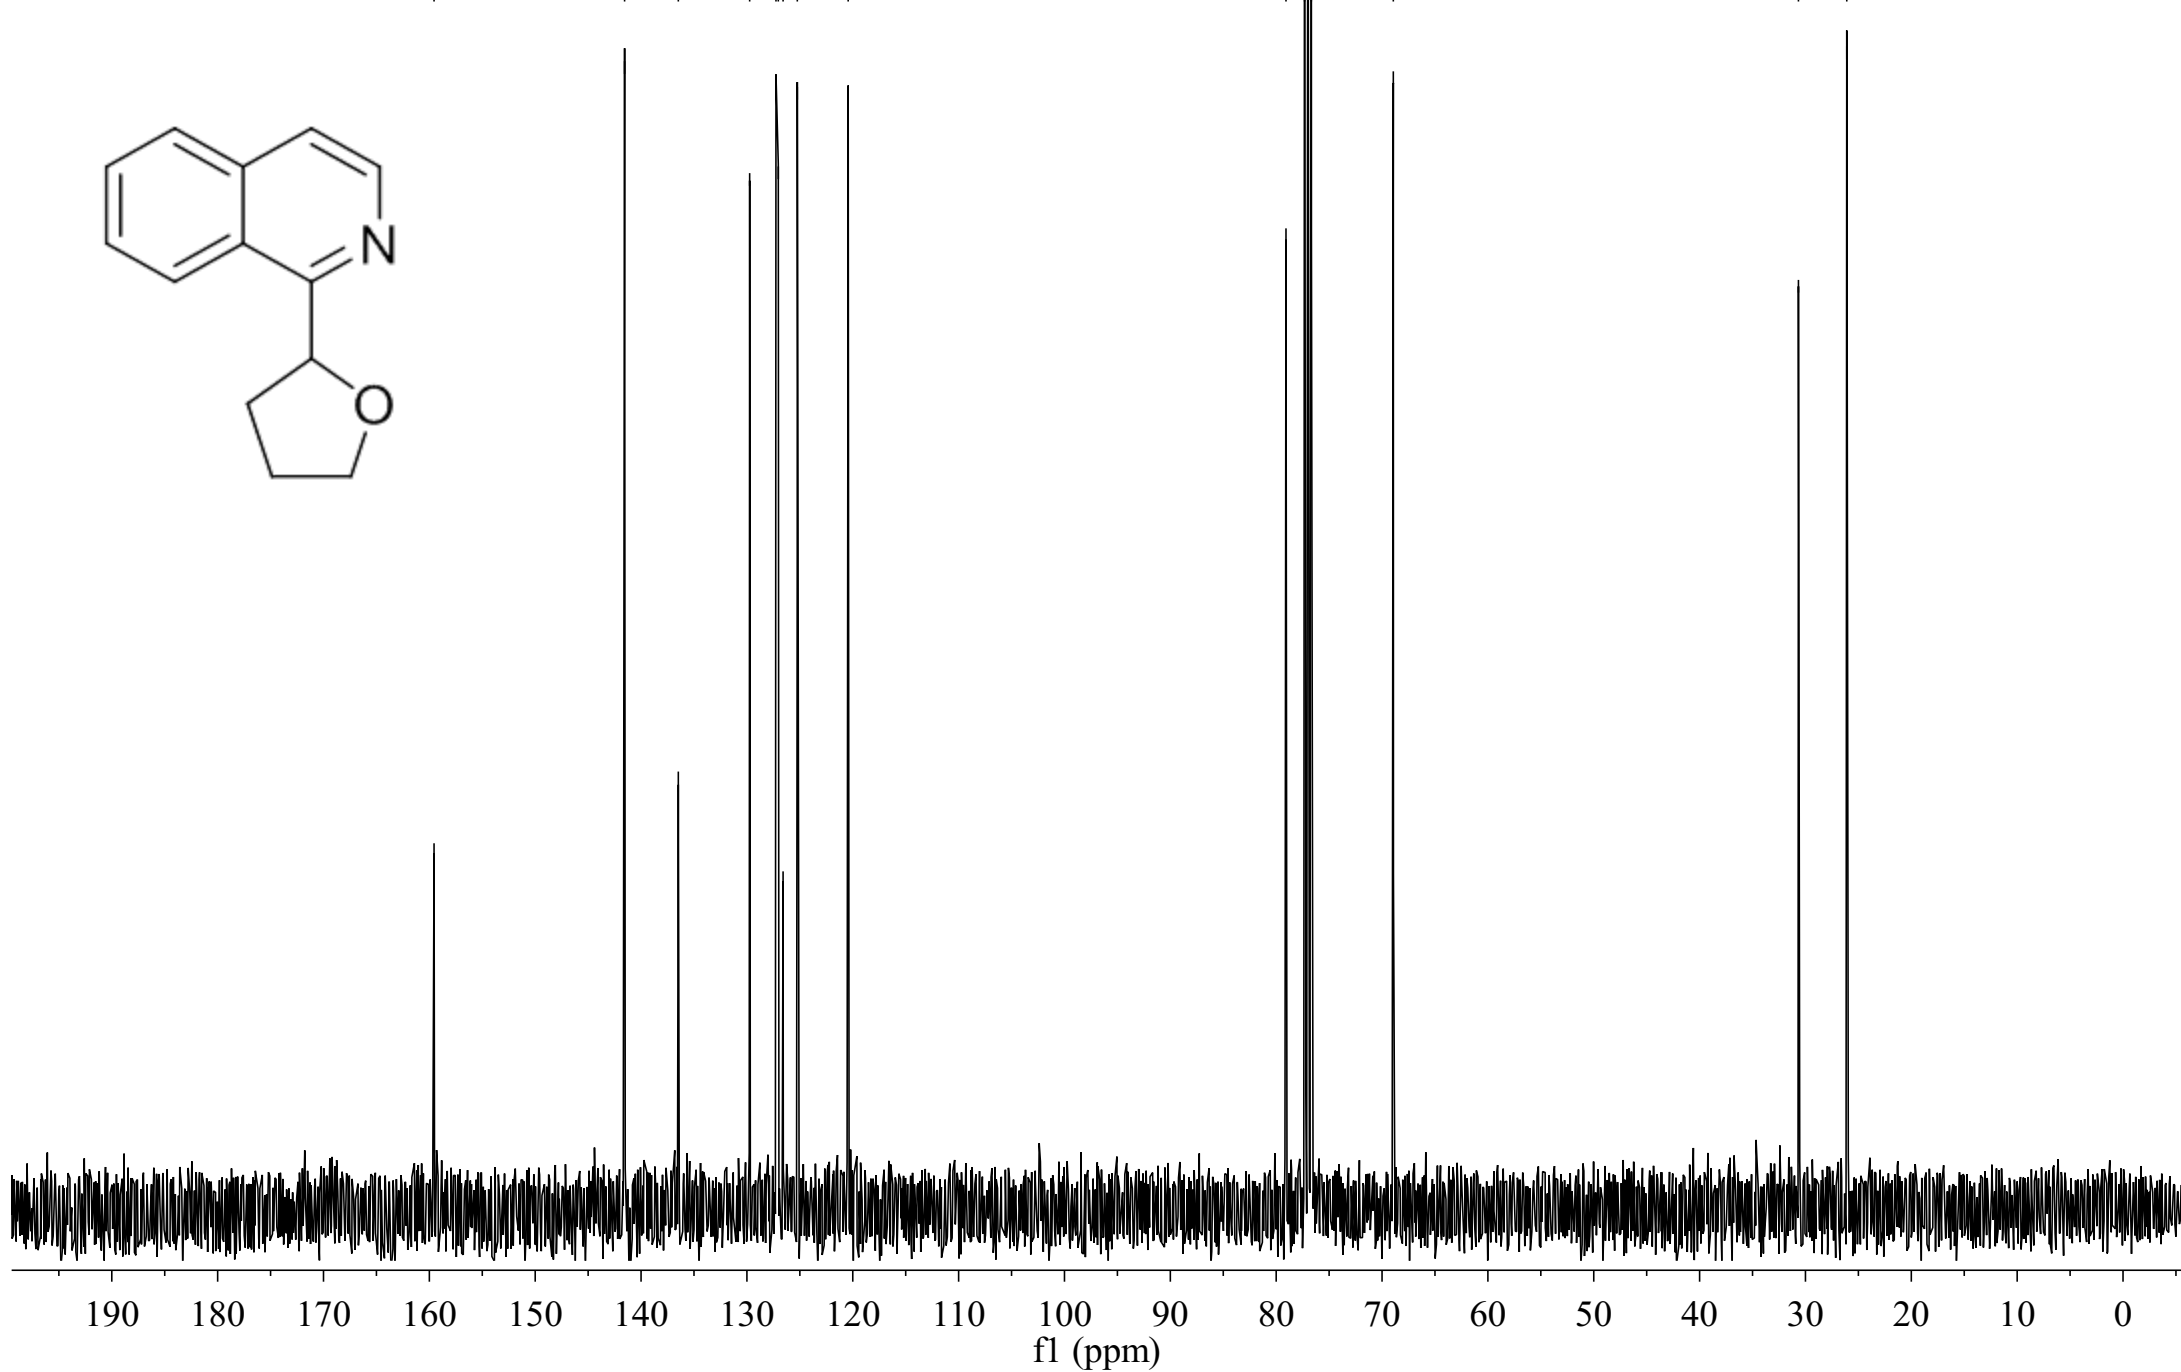

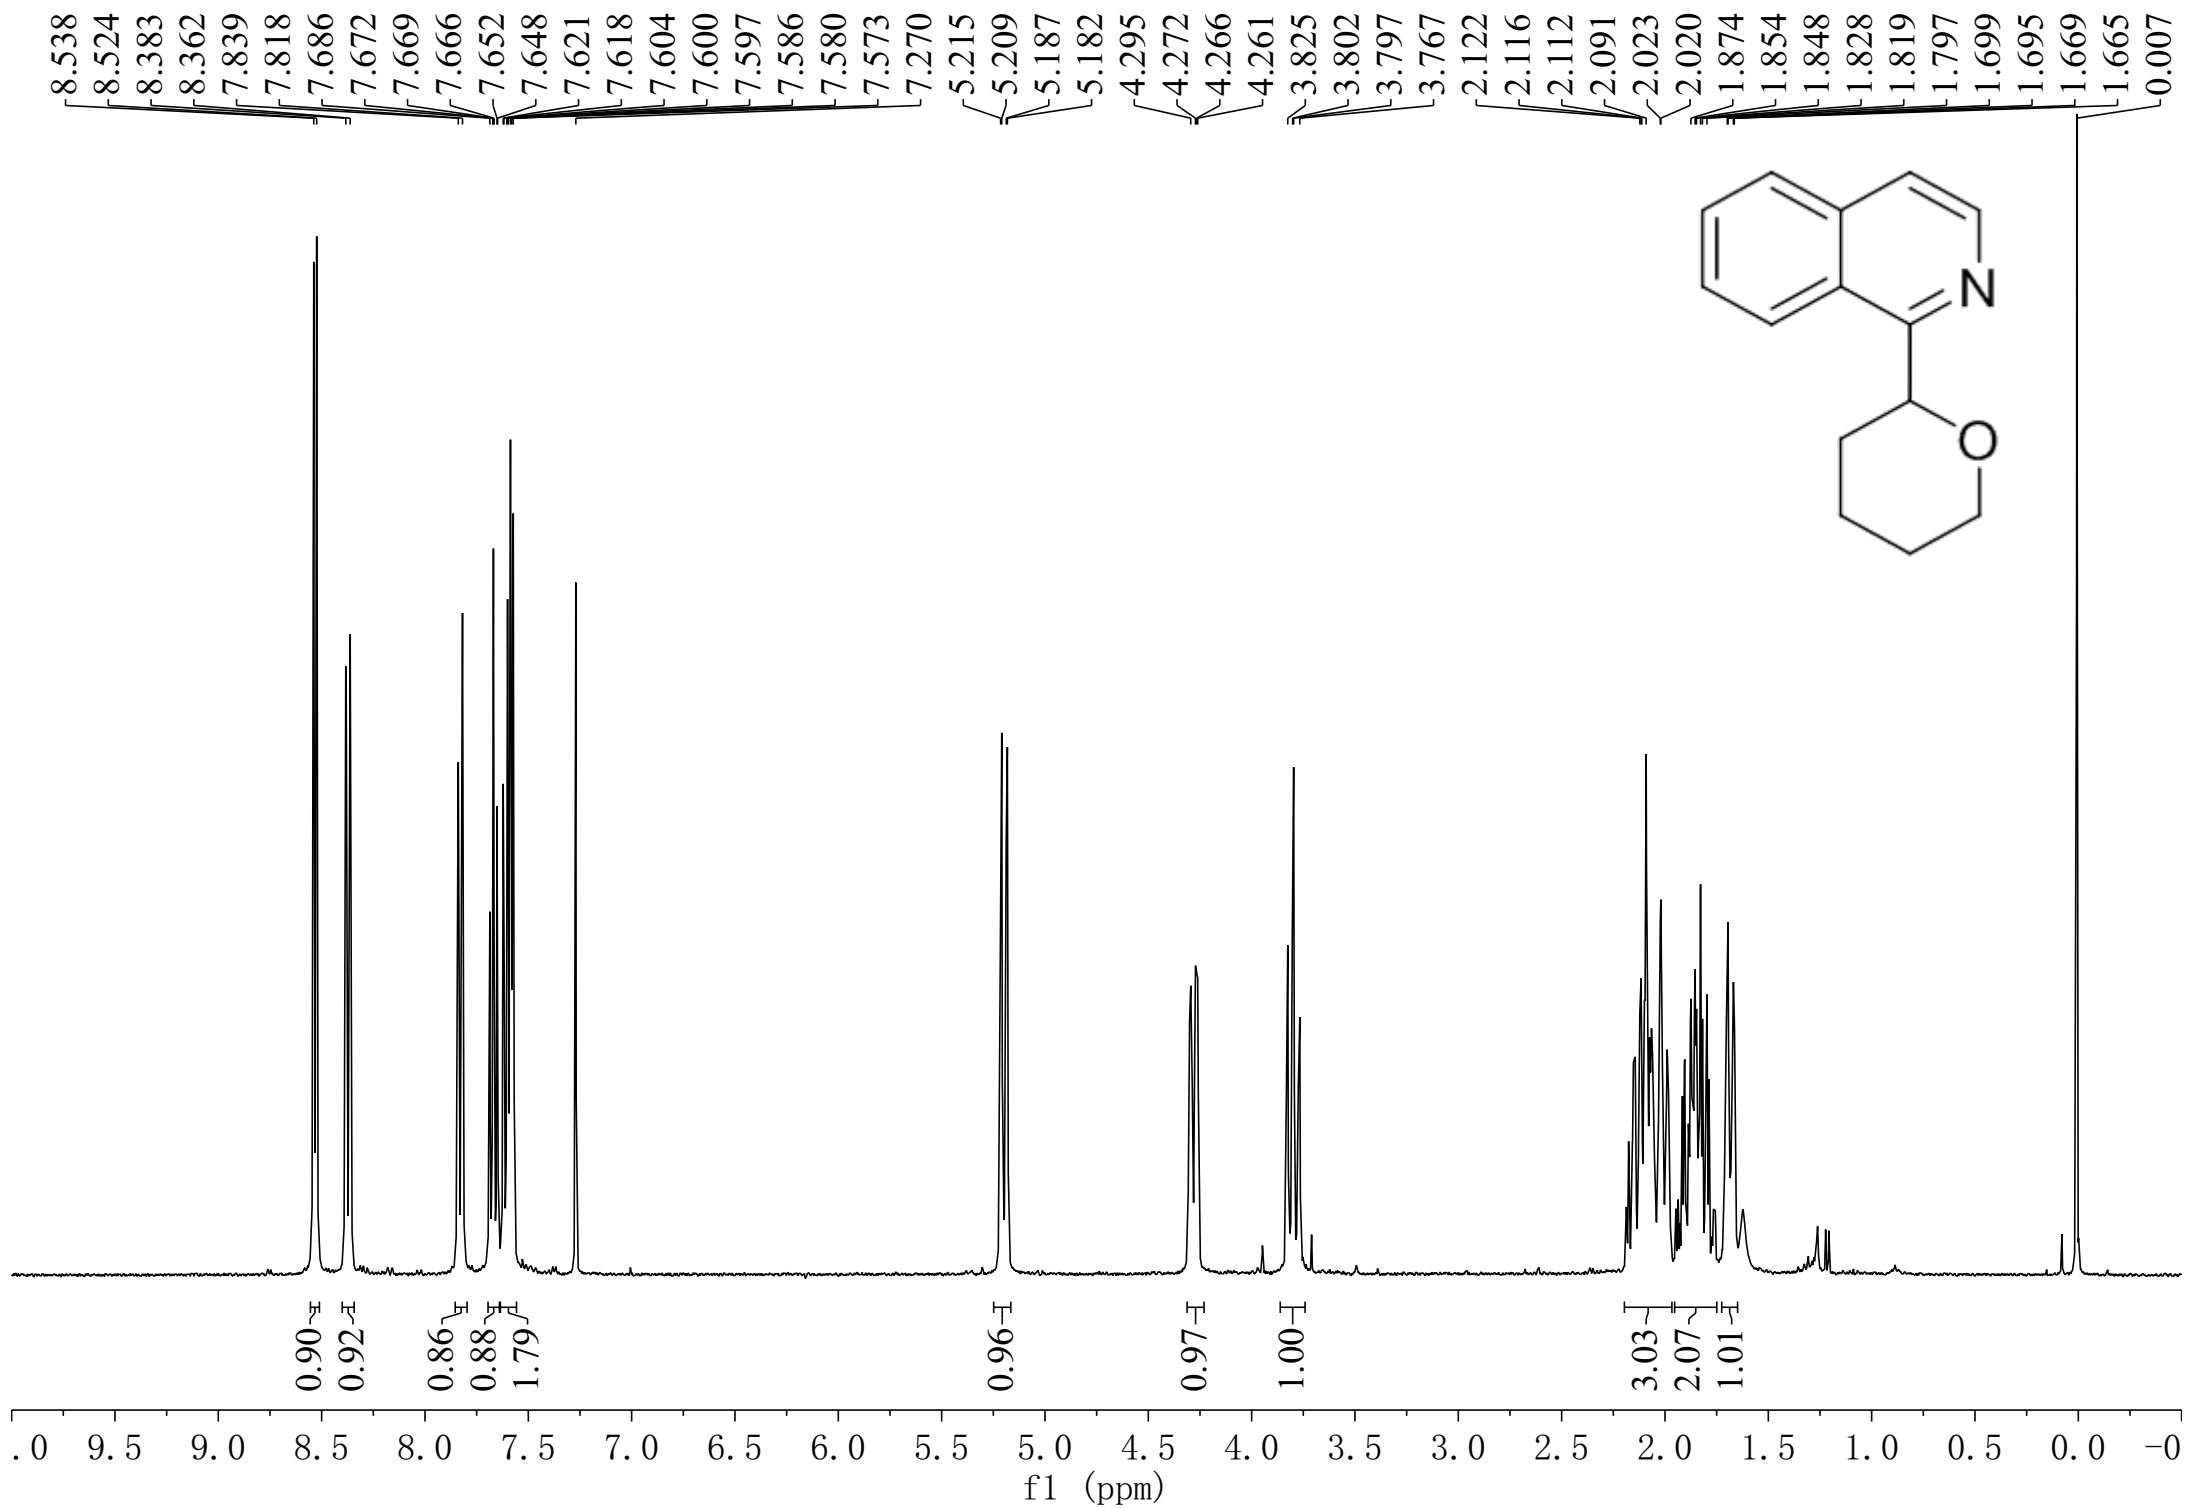

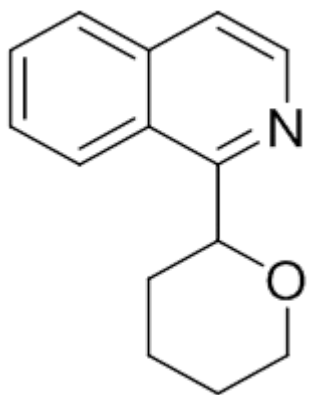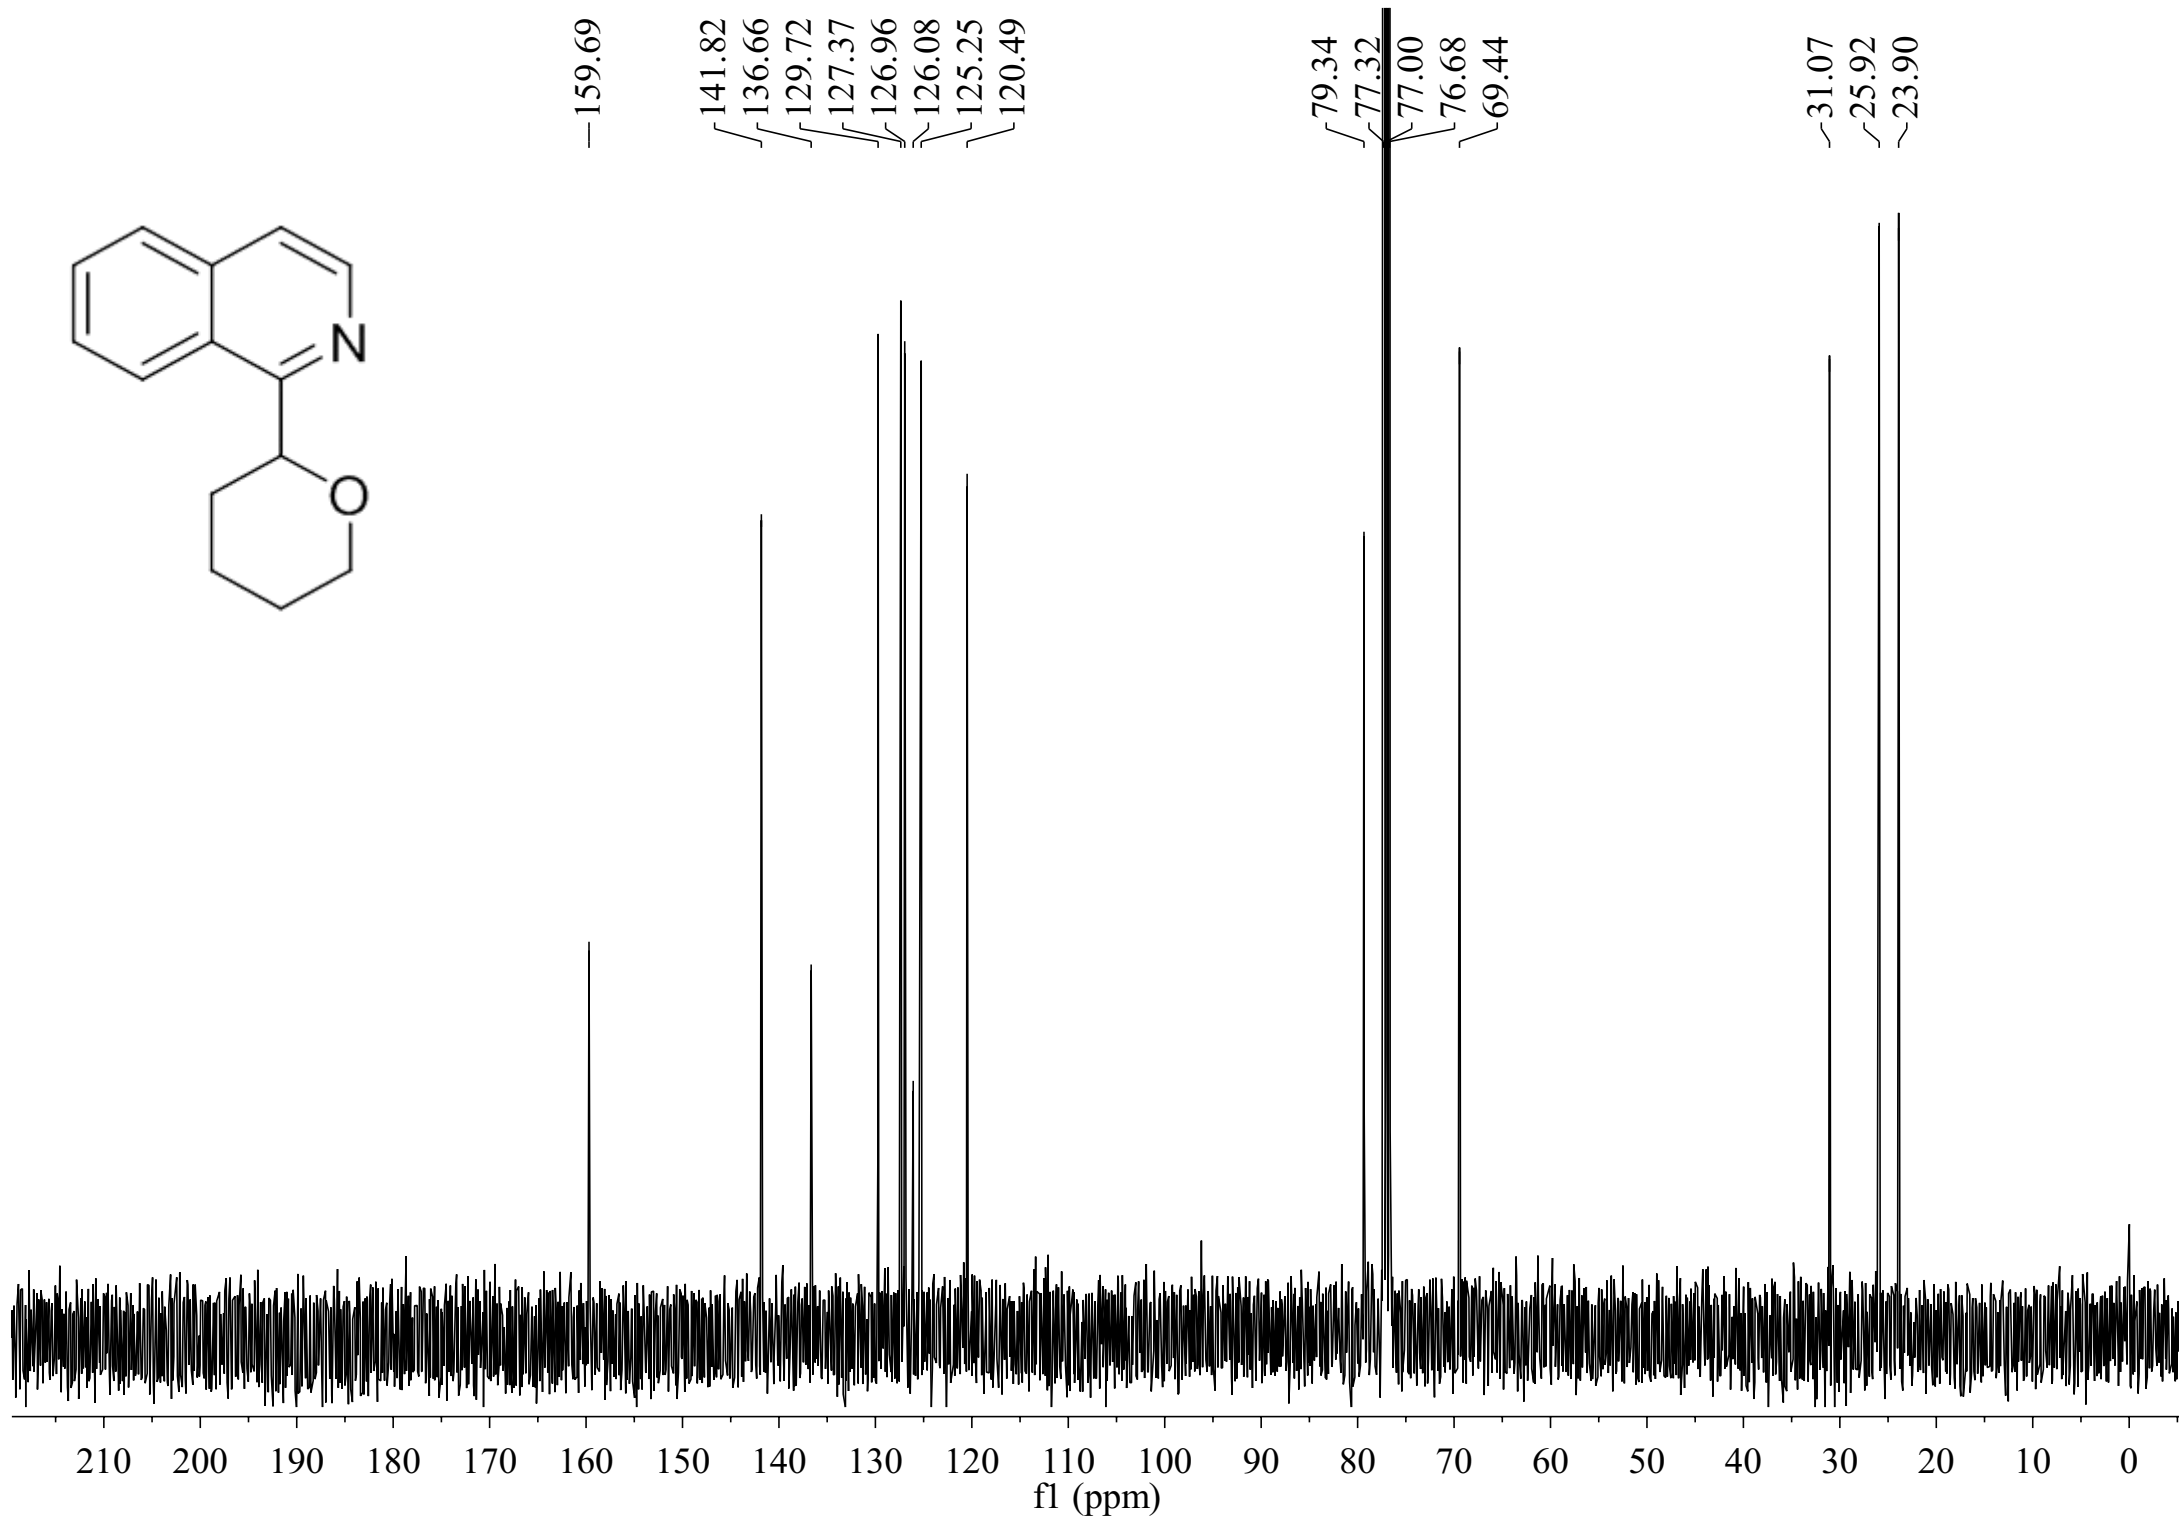

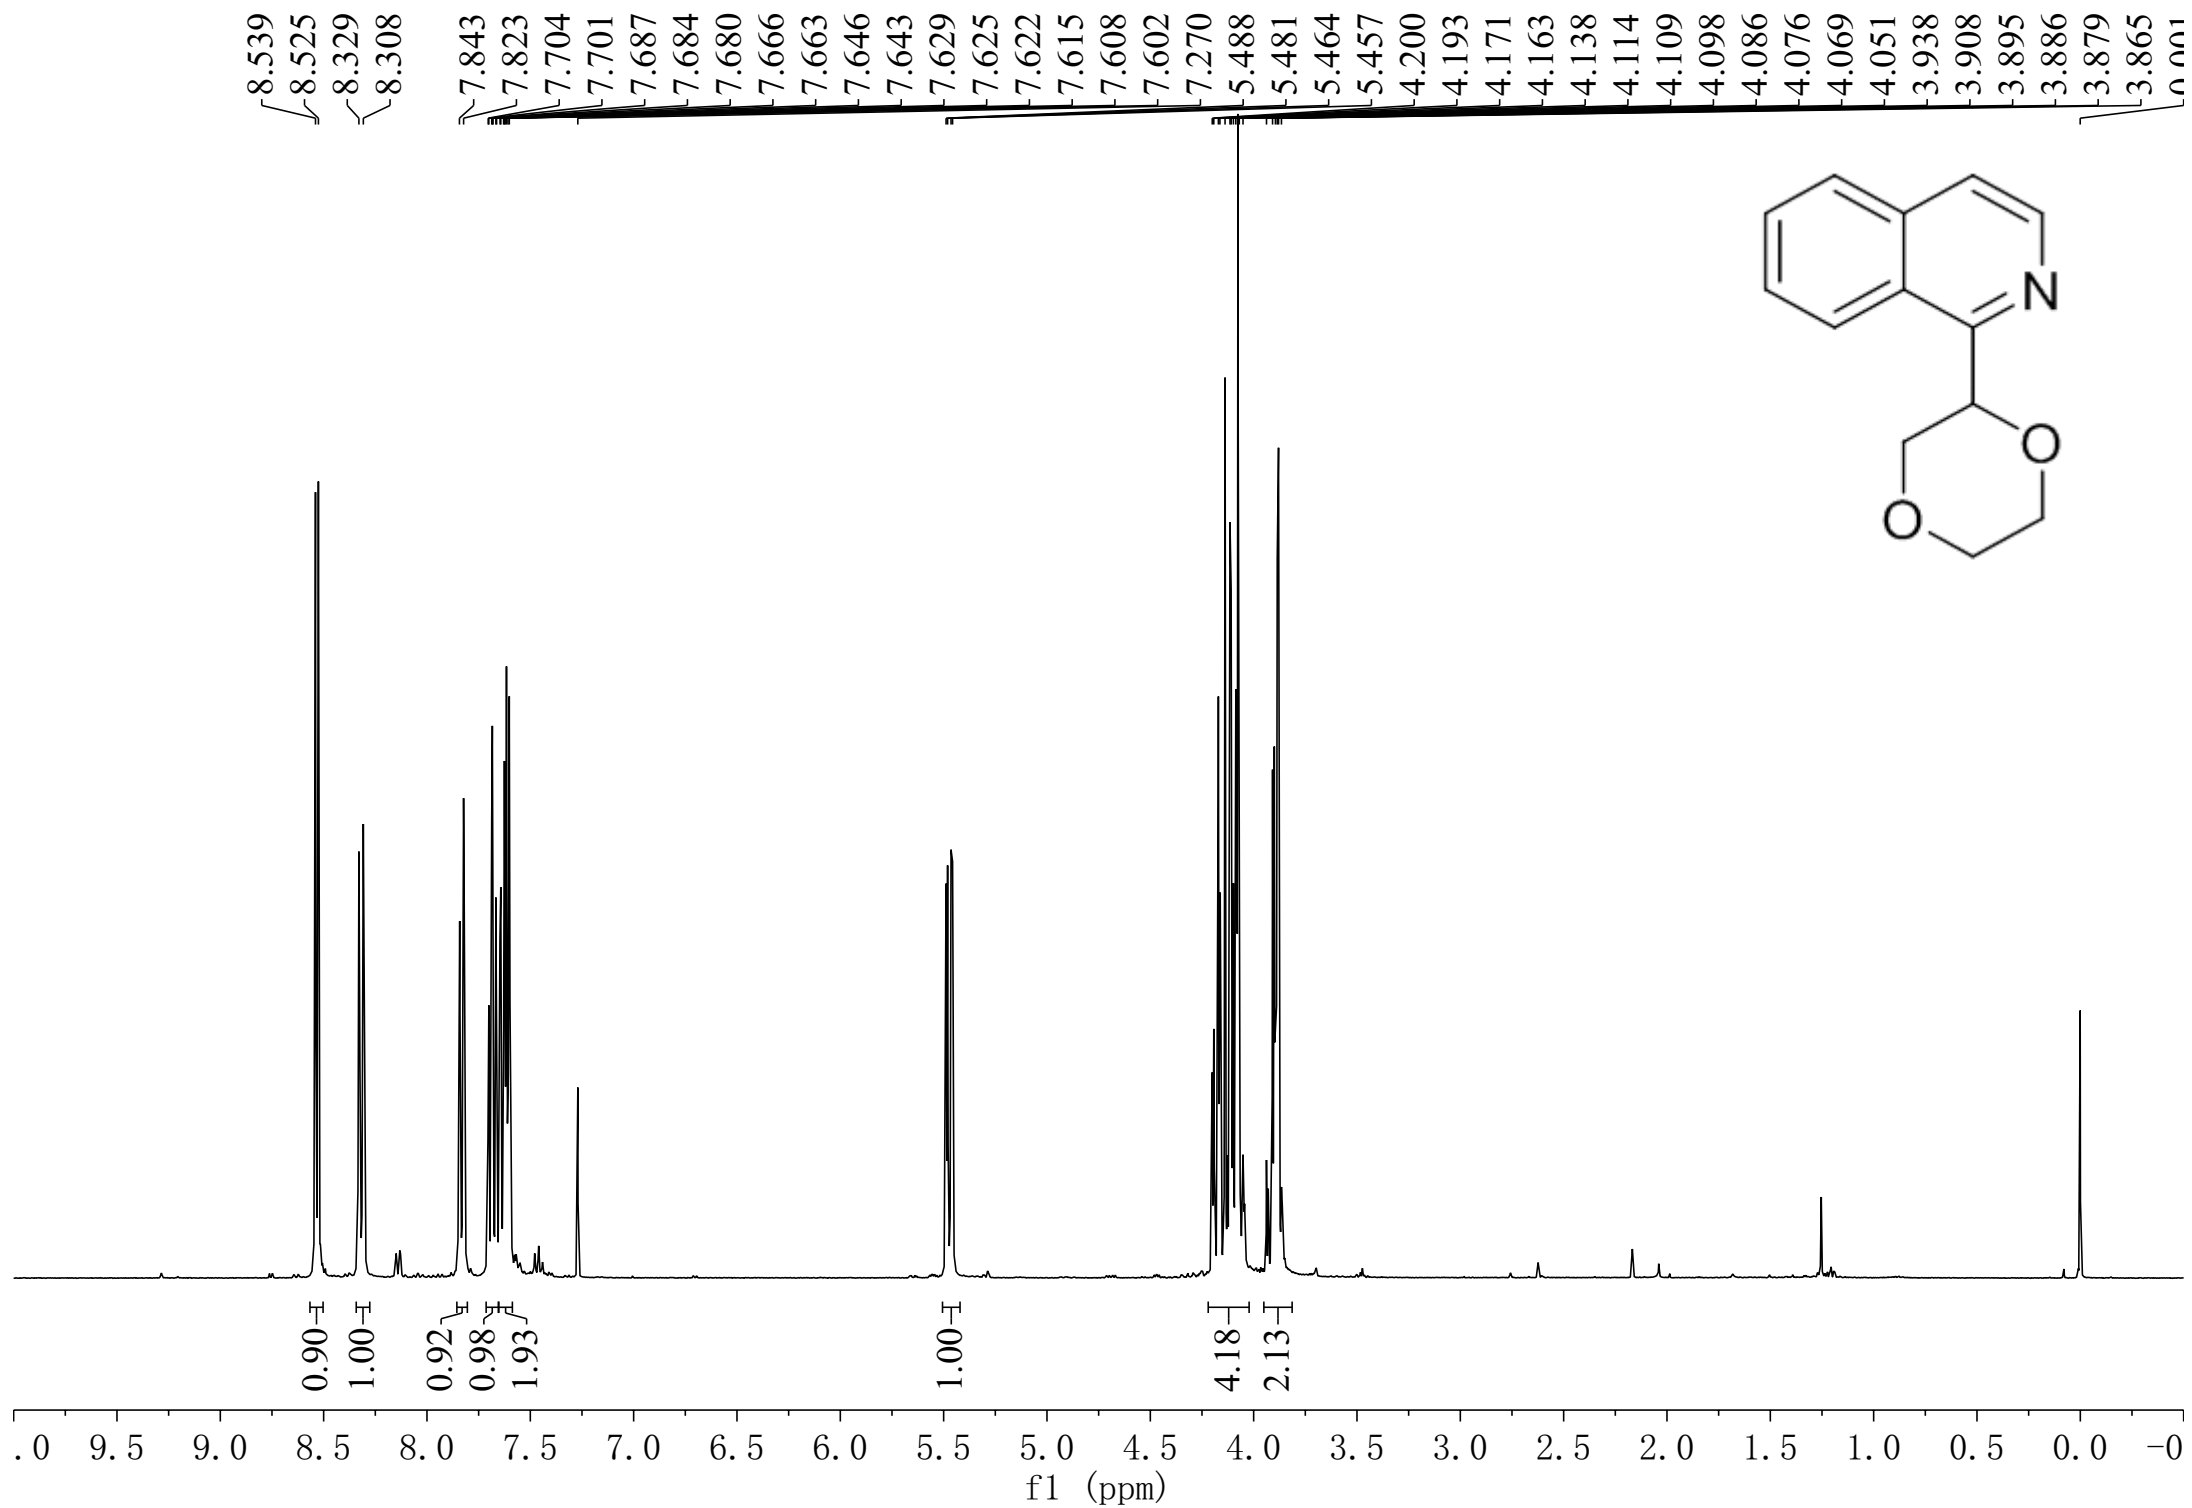

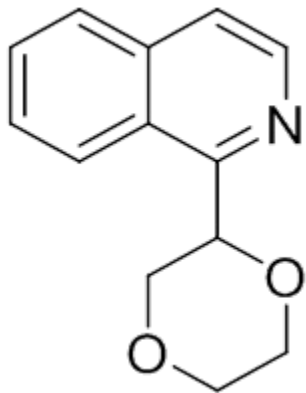

155.95

141.78

136.44

129.98

127.42

126.47

124.67

121.01

77.32

77.00

76.68

75.83

70.24

67.53

66.47

200 190 180 170 160 150 140 130 120 110 100 90 80 70 60 50 40 30 20 10 0

fl (ppm)

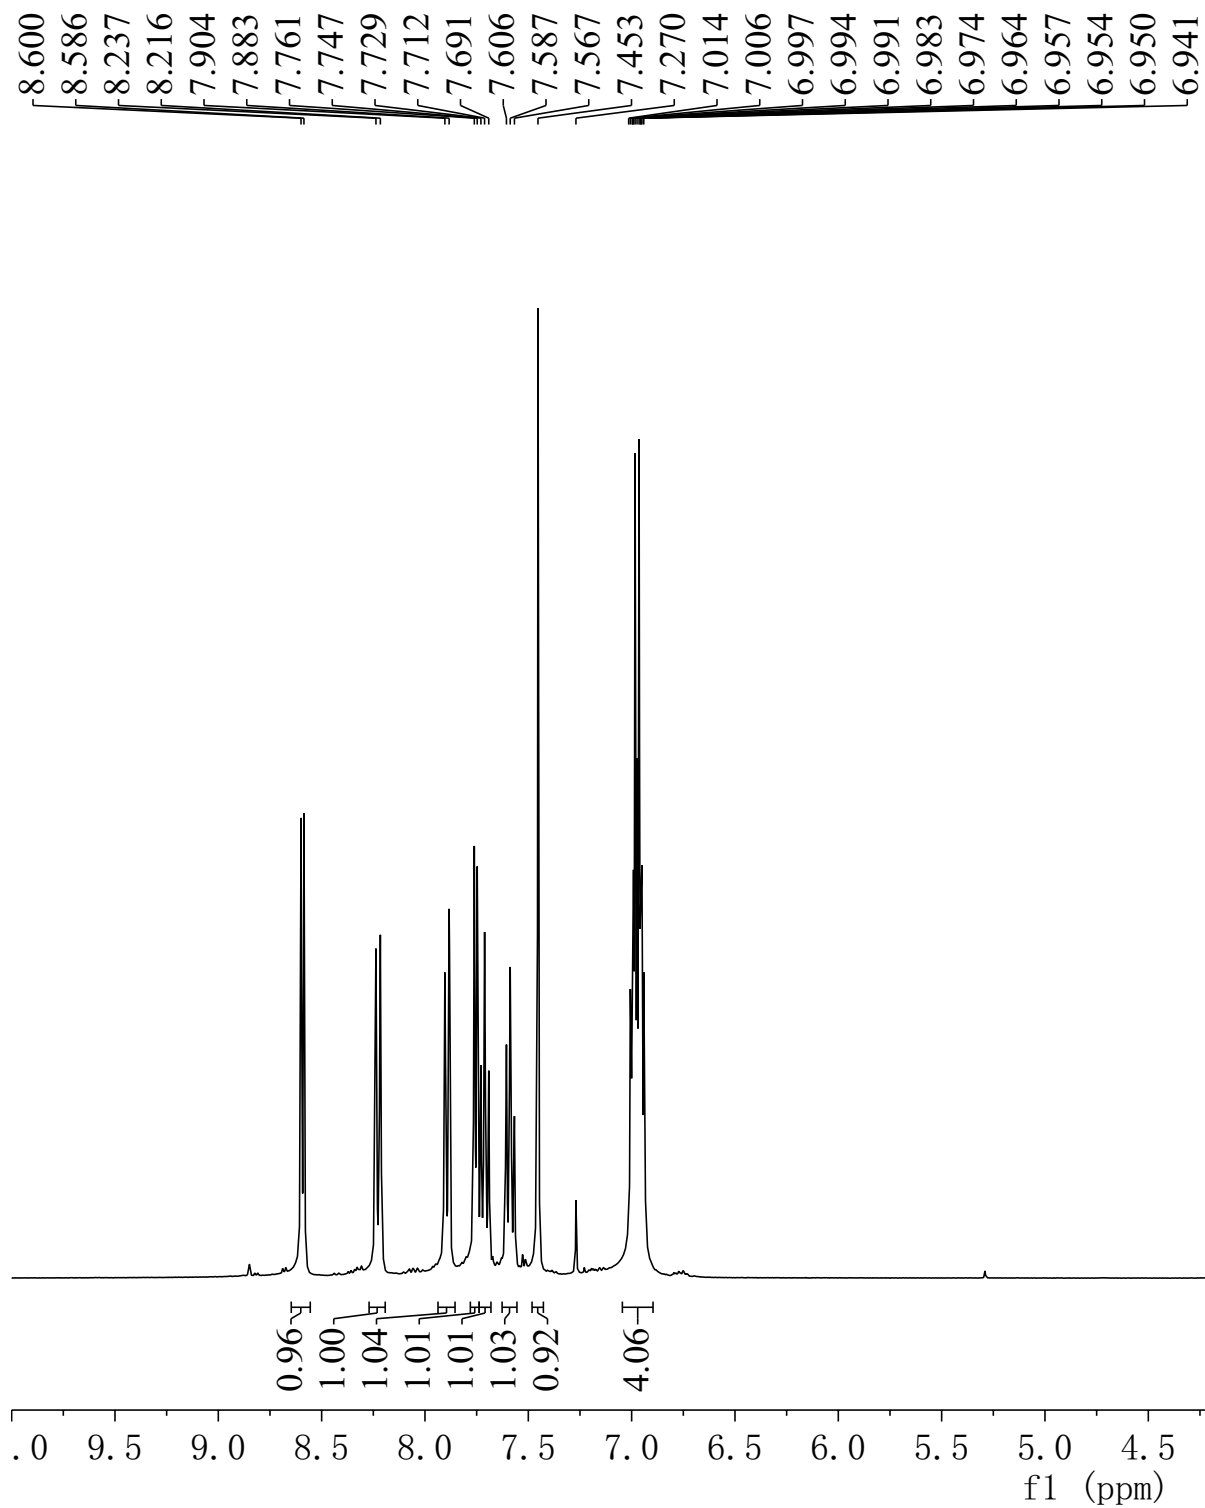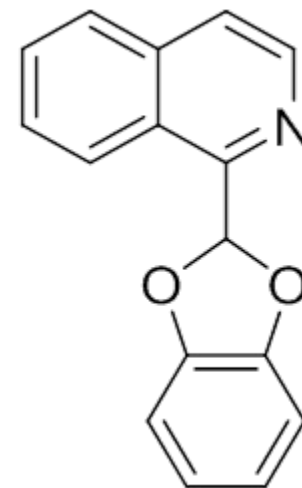

—0.023



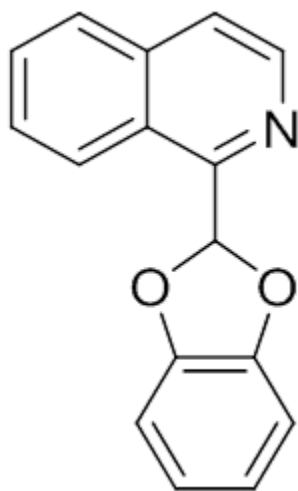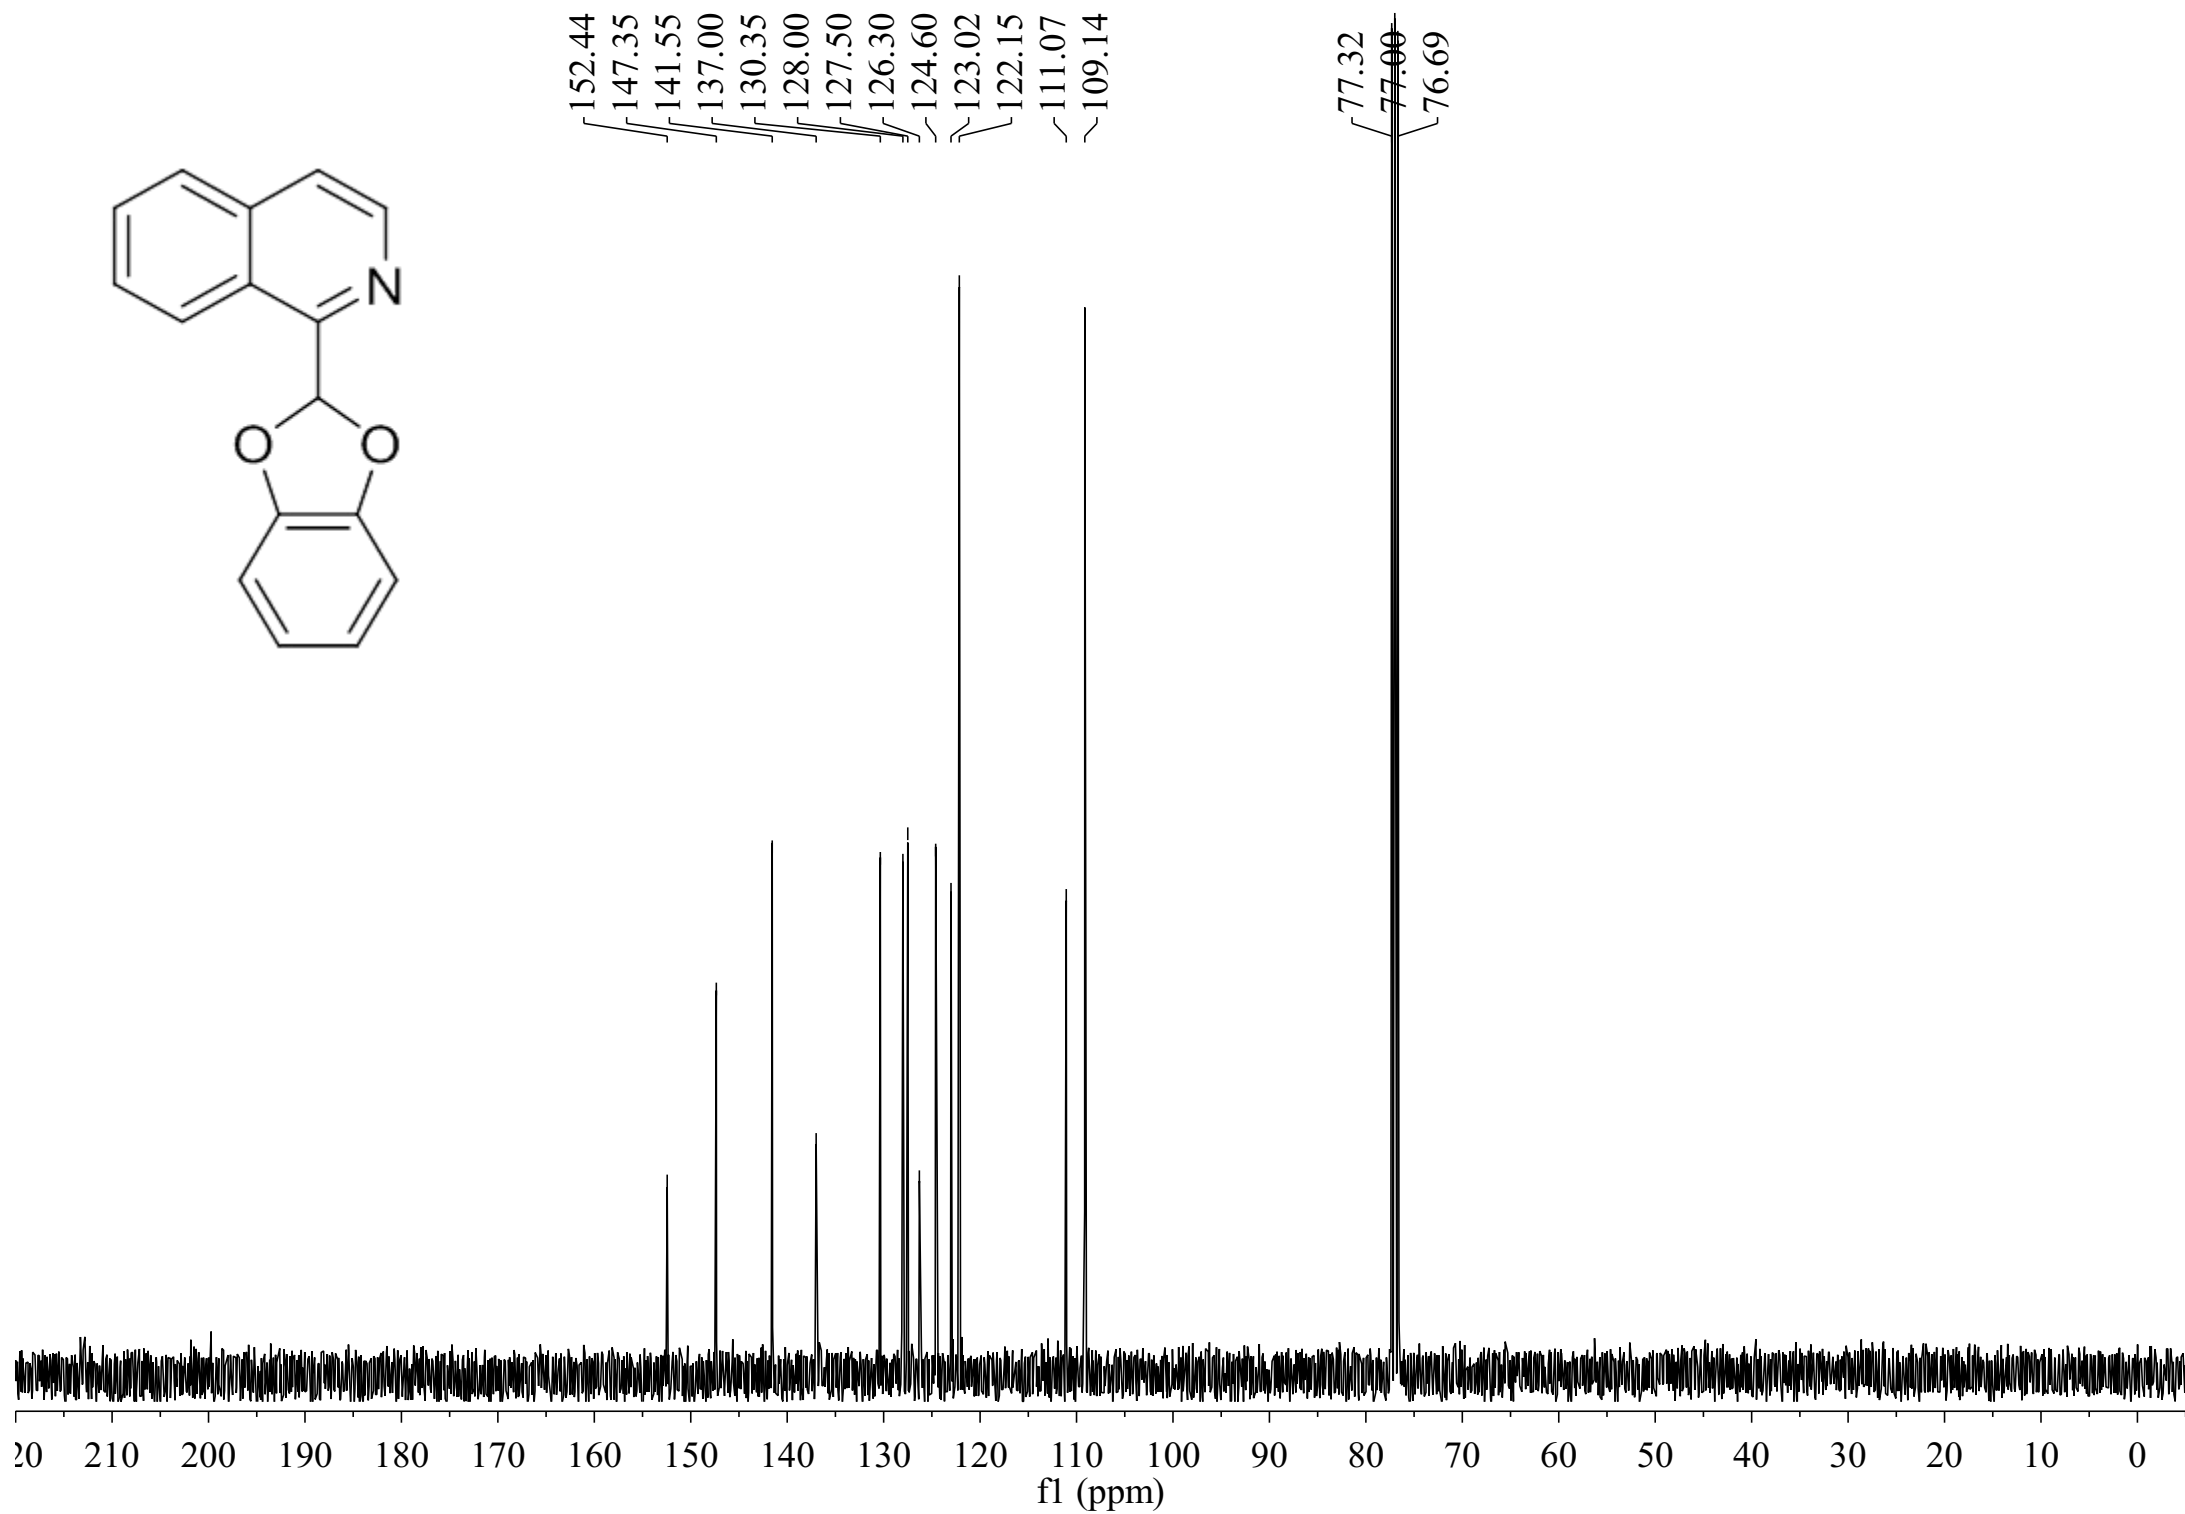

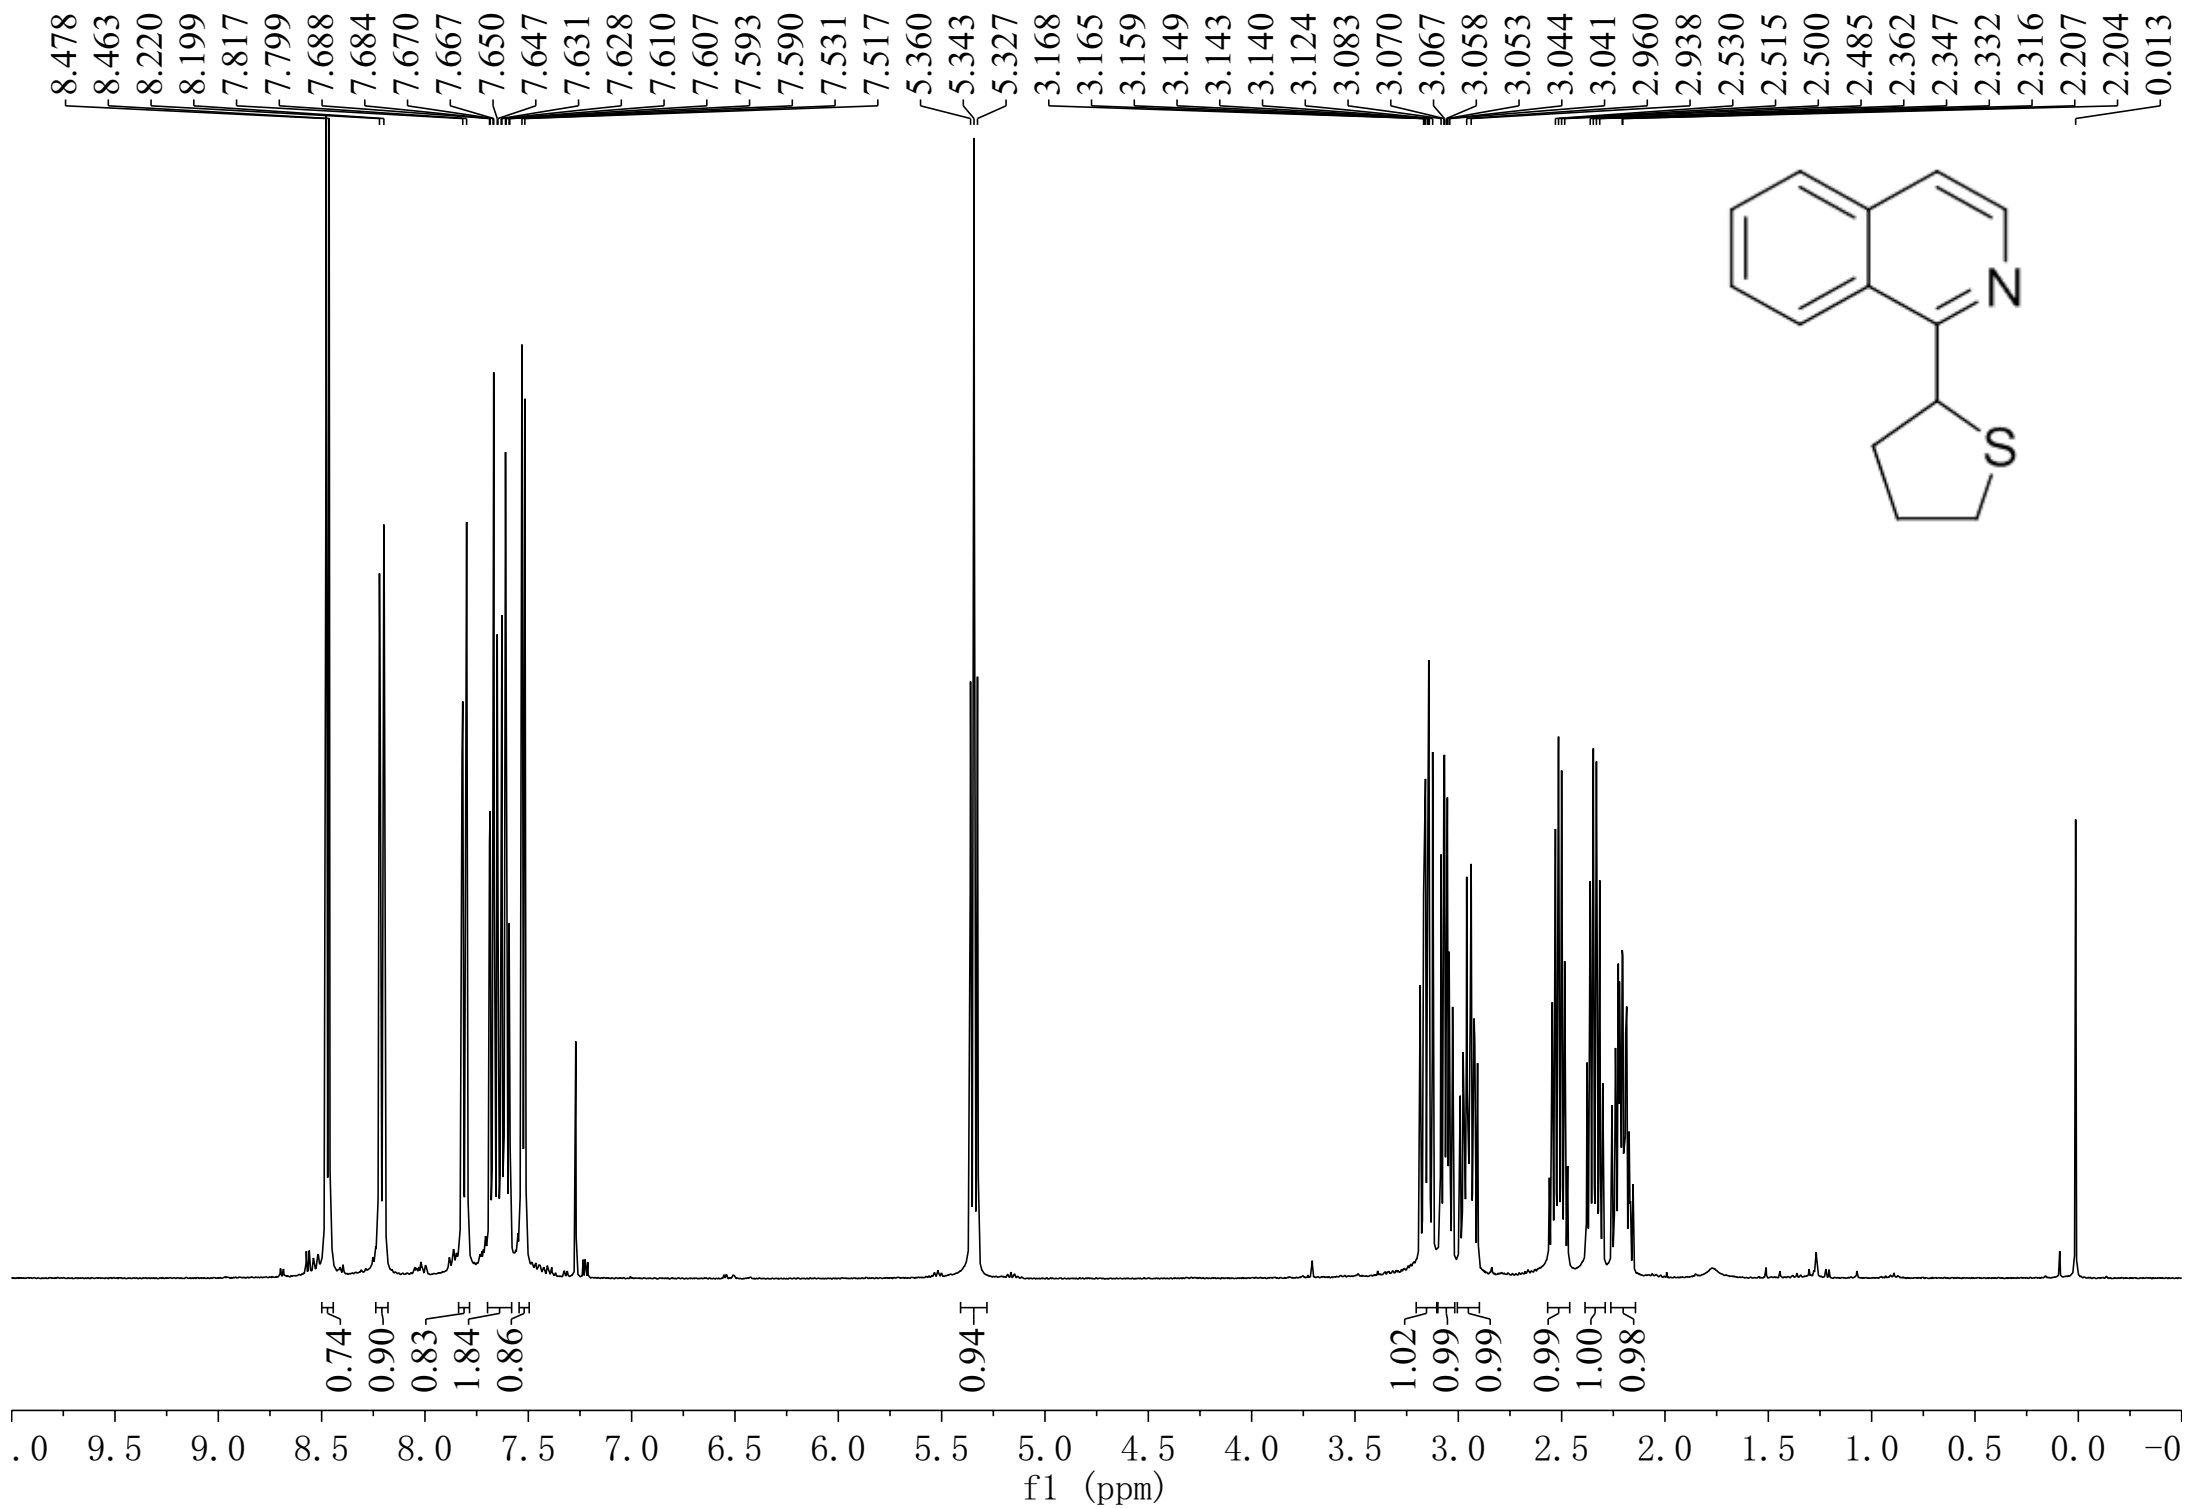

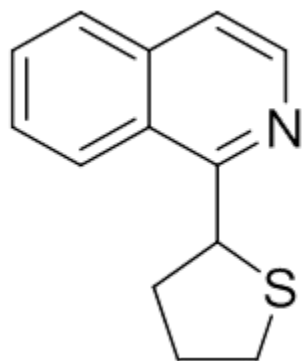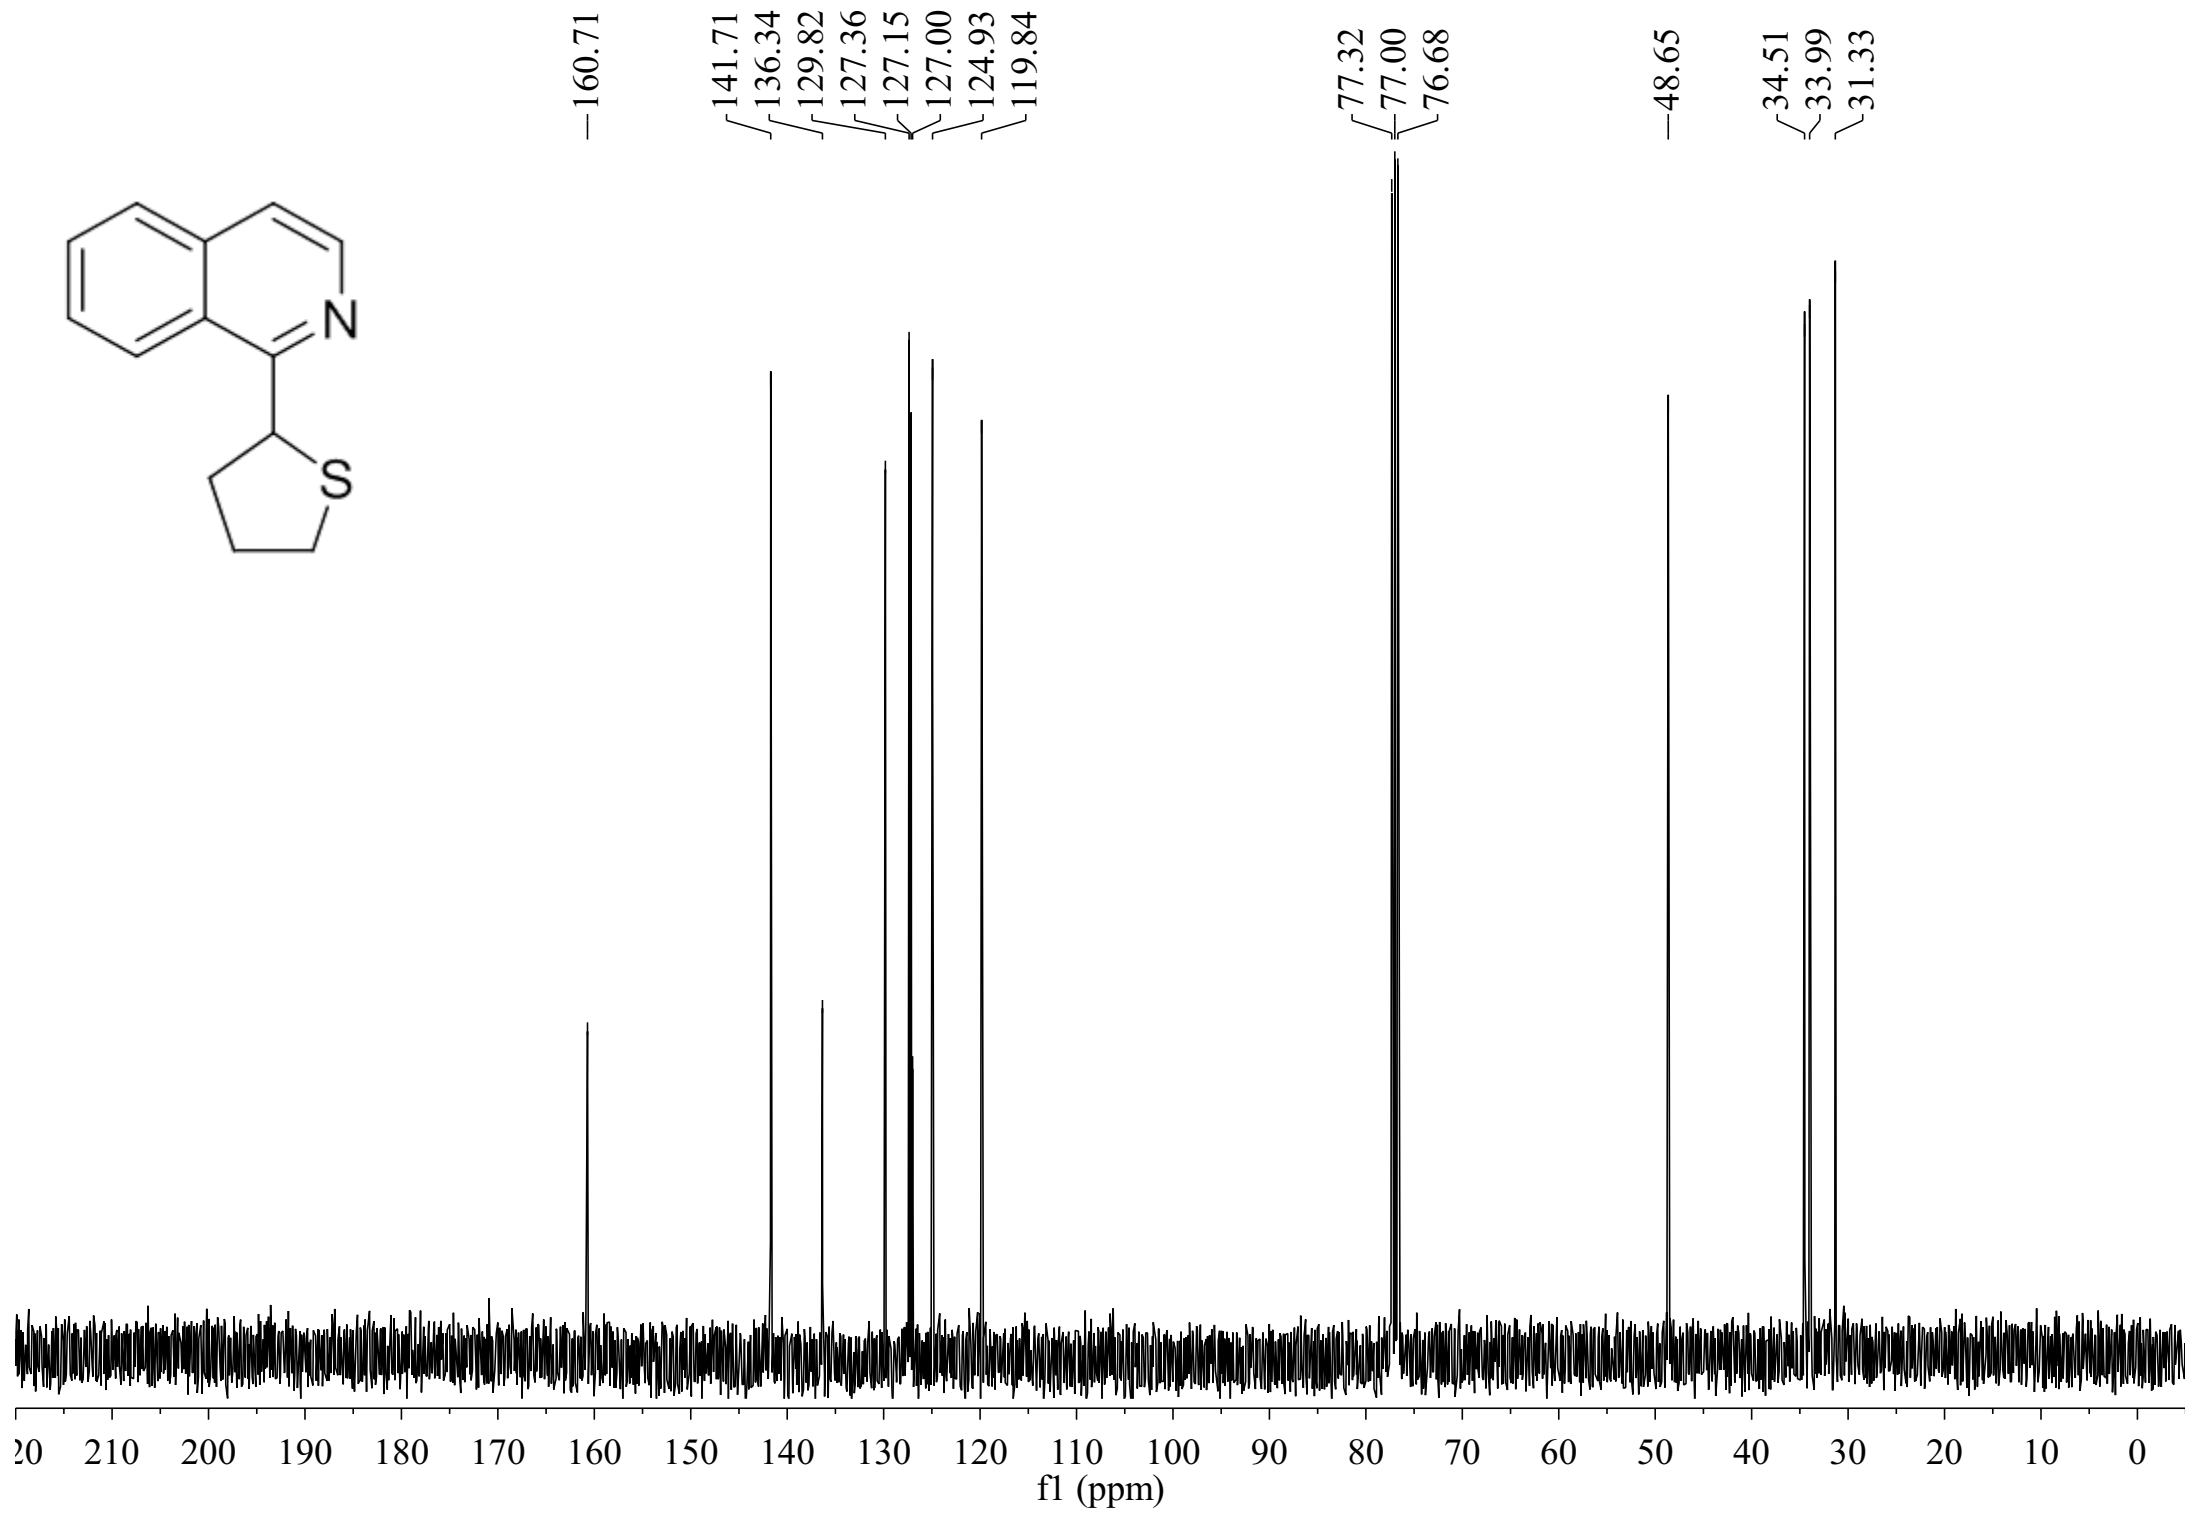

8.462  
8.448  
8.257  
8.236  
8.199  
8.178  
7.847  
7.827  
7.818  
7.796  
7.676  
7.653  
7.632  
7.616  
7.603  
7.597  
7.587  
7.521  
7.507  
7.270  
5.897  
5.890  
5.877  
5.870  
4.133  
4.115  
4.098  
4.080  
3.904  
3.892  
3.879  
3.865  
3.847  
3.823  
3.692  
2.120  
2.104  
2.091  
2.045  
1.997  
1.987  
1.974  
1.956  
1.283  
1.265  
1.248  
0.702  
0.684  
0.666  
0.003

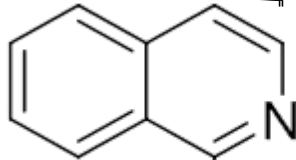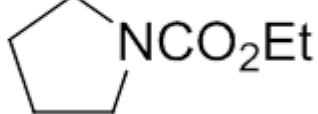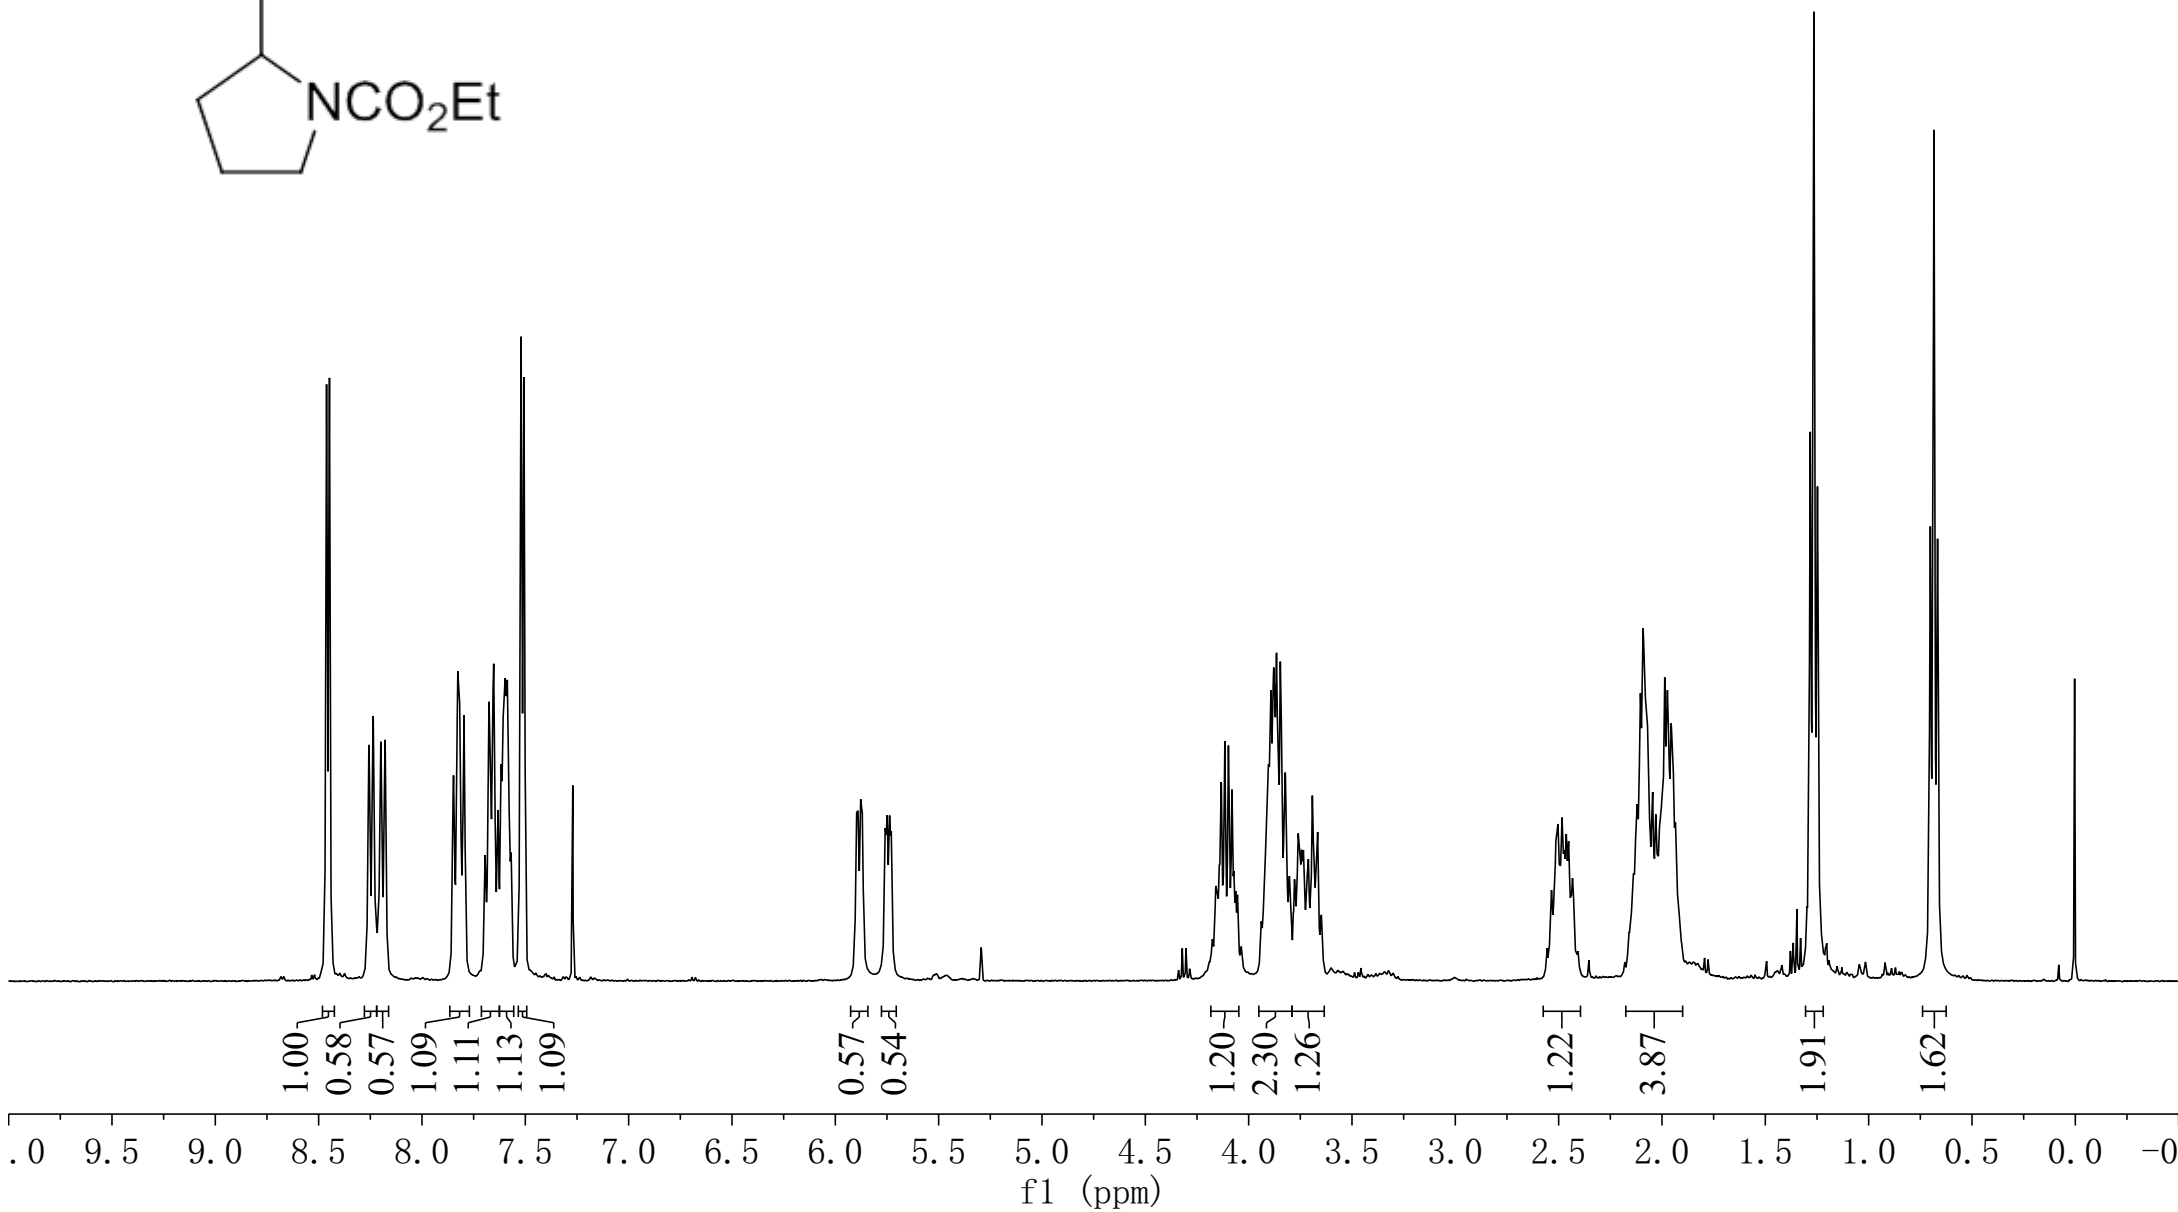

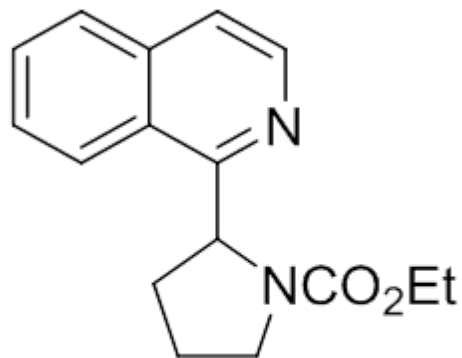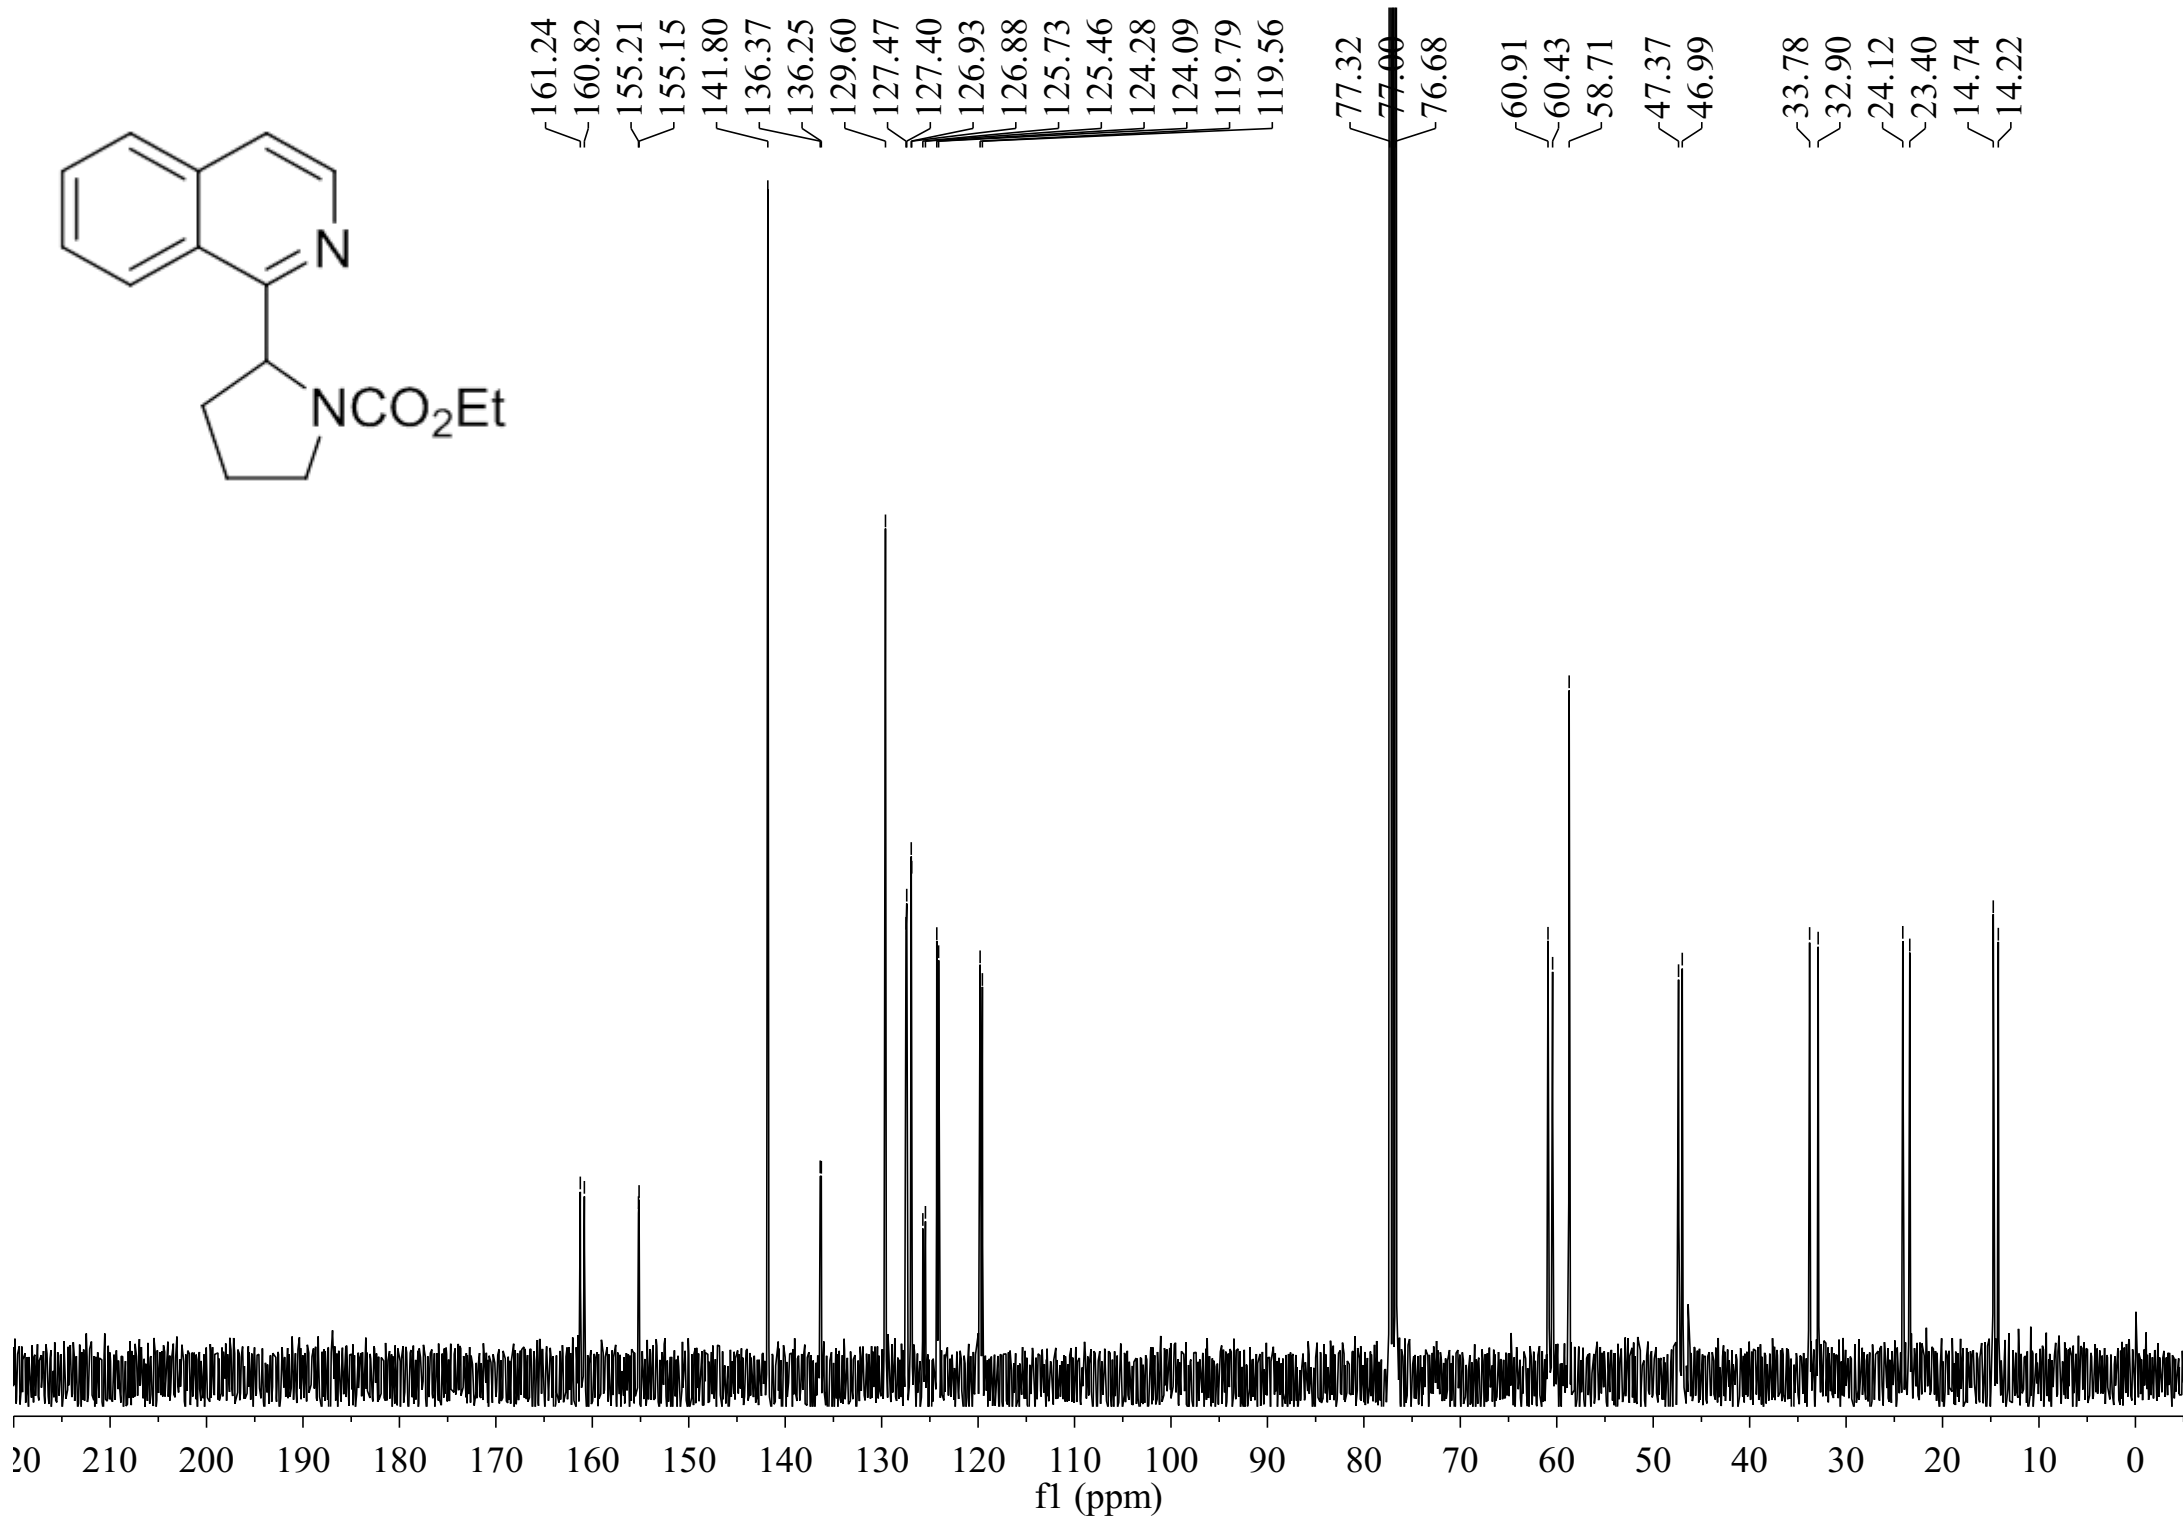

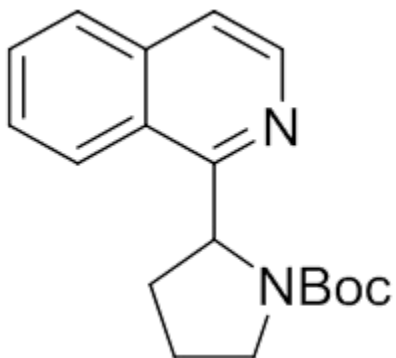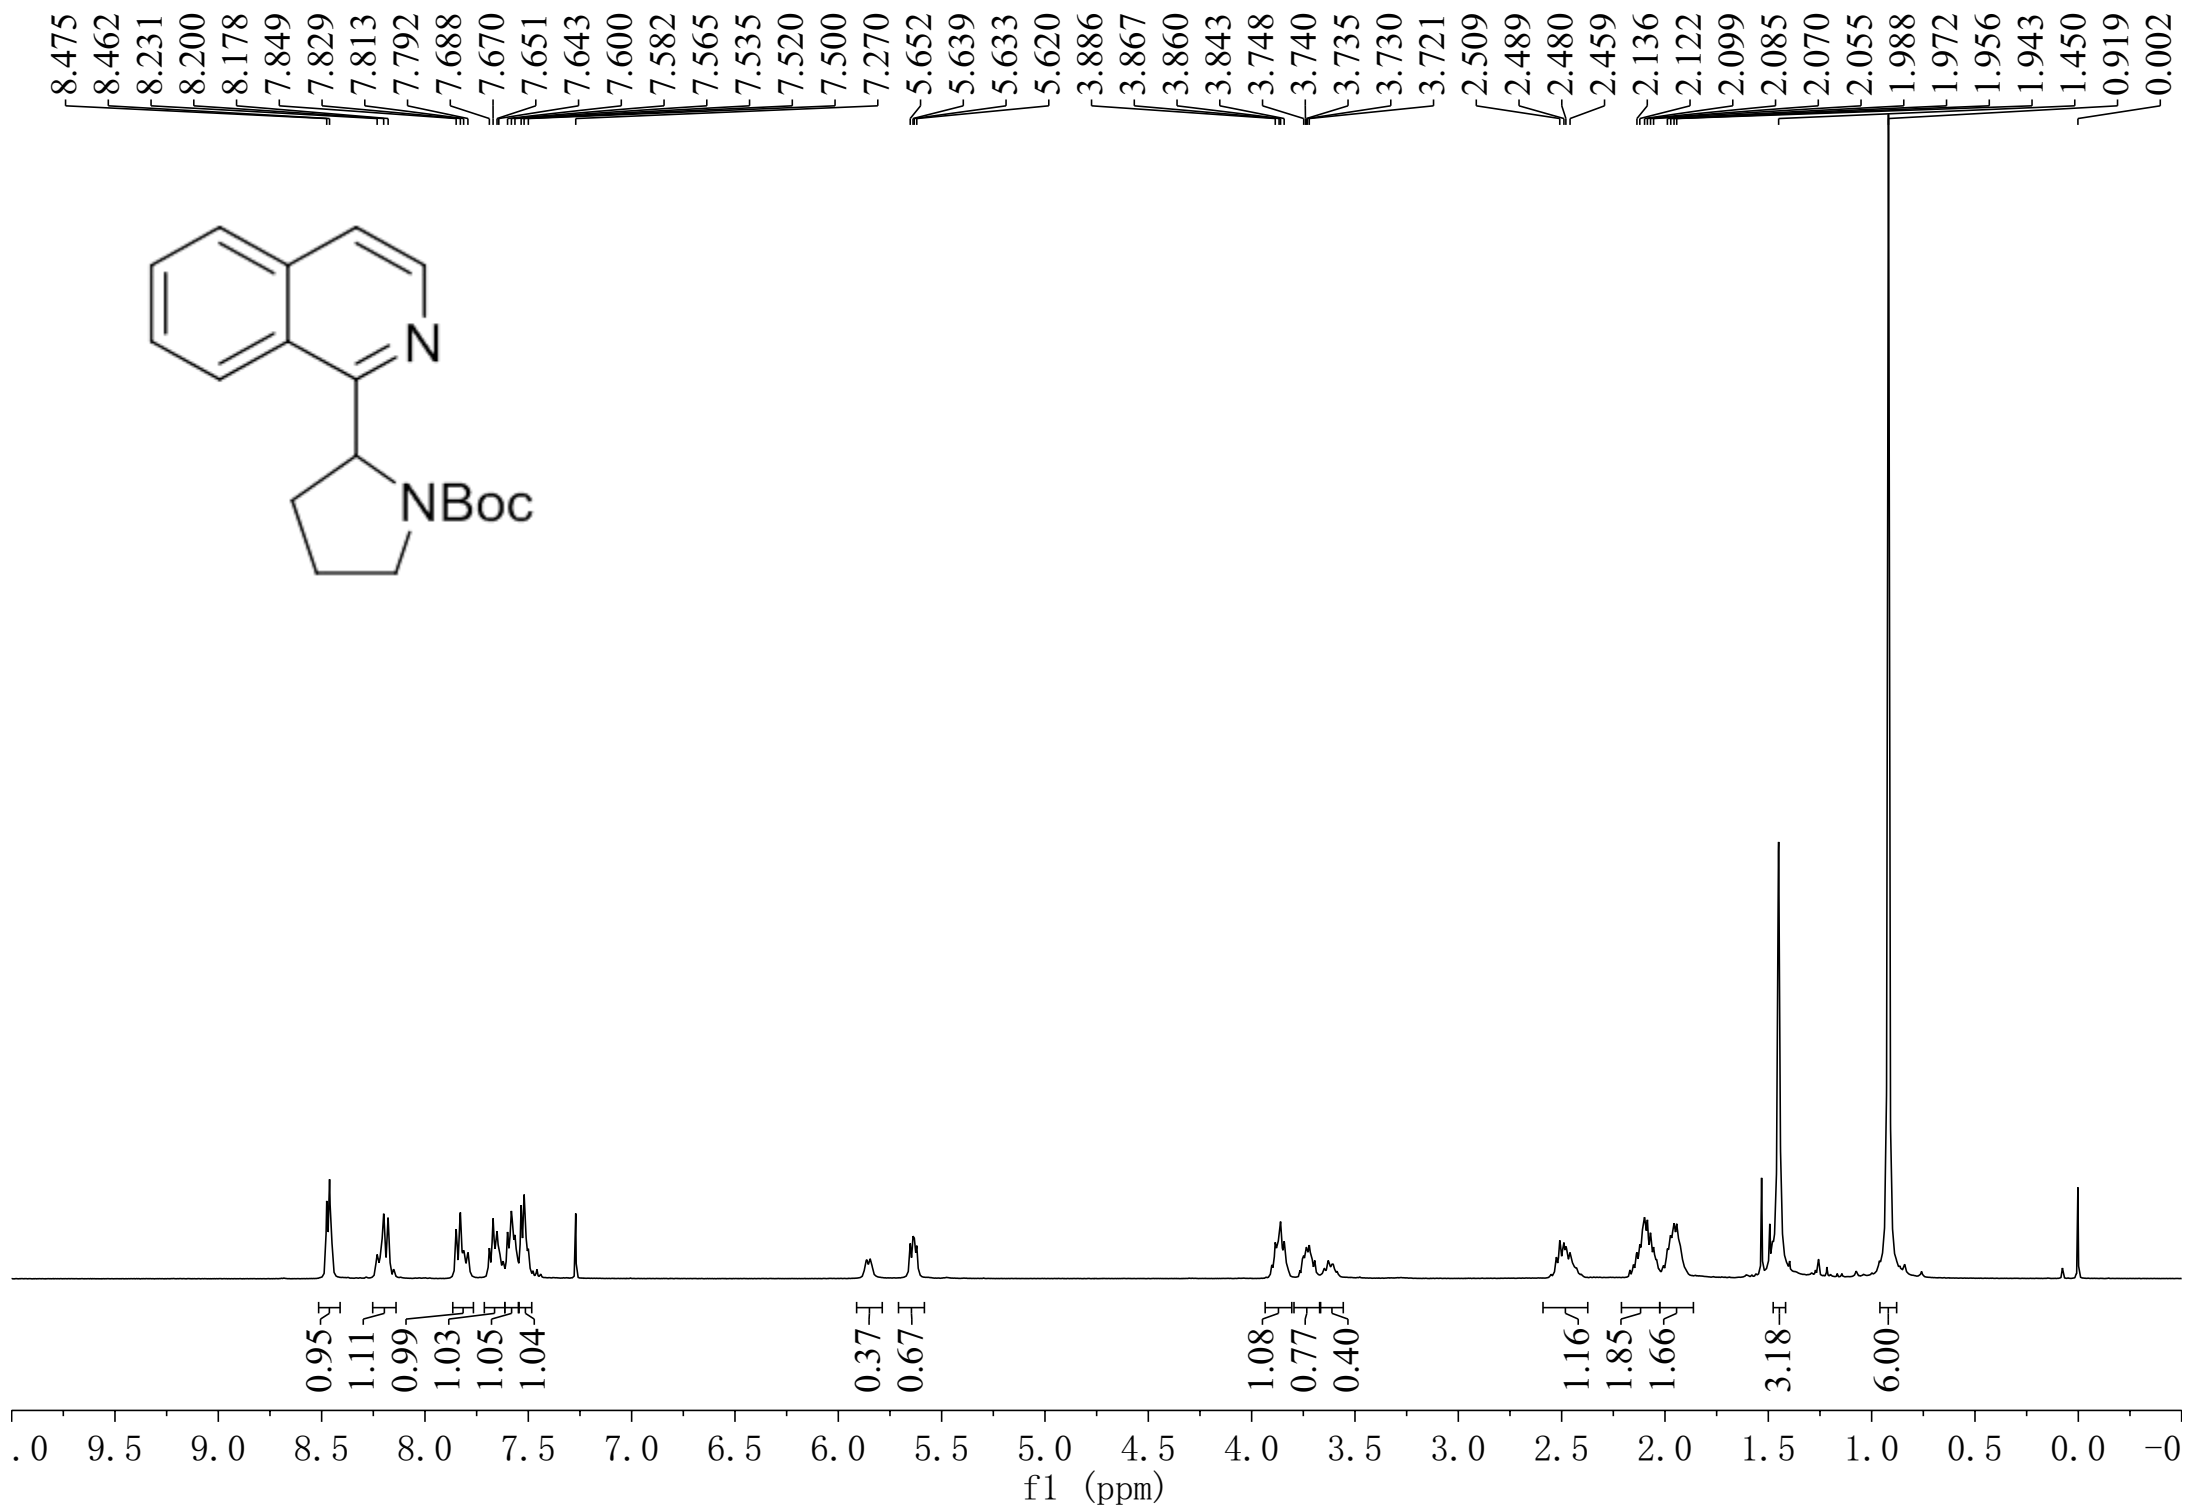

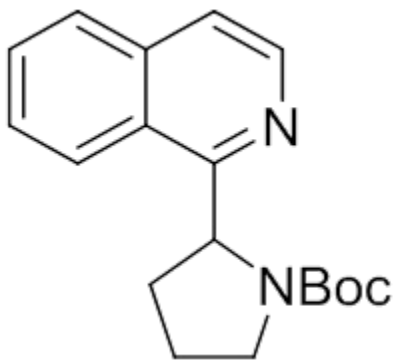

162.12  
161.04  
154.61  
154.33  
141.74  
136.23  
129.62  
127.46  
126.90  
125.60  
124.28  
124.03  
119.75  
119.50

79.18  
78.71  
77.32  
77.00  
76.68

59.46  
58.60

47.31  
47.05

33.89  
32.88  
28.49  
28.01  
27.90  
24.04  
23.75

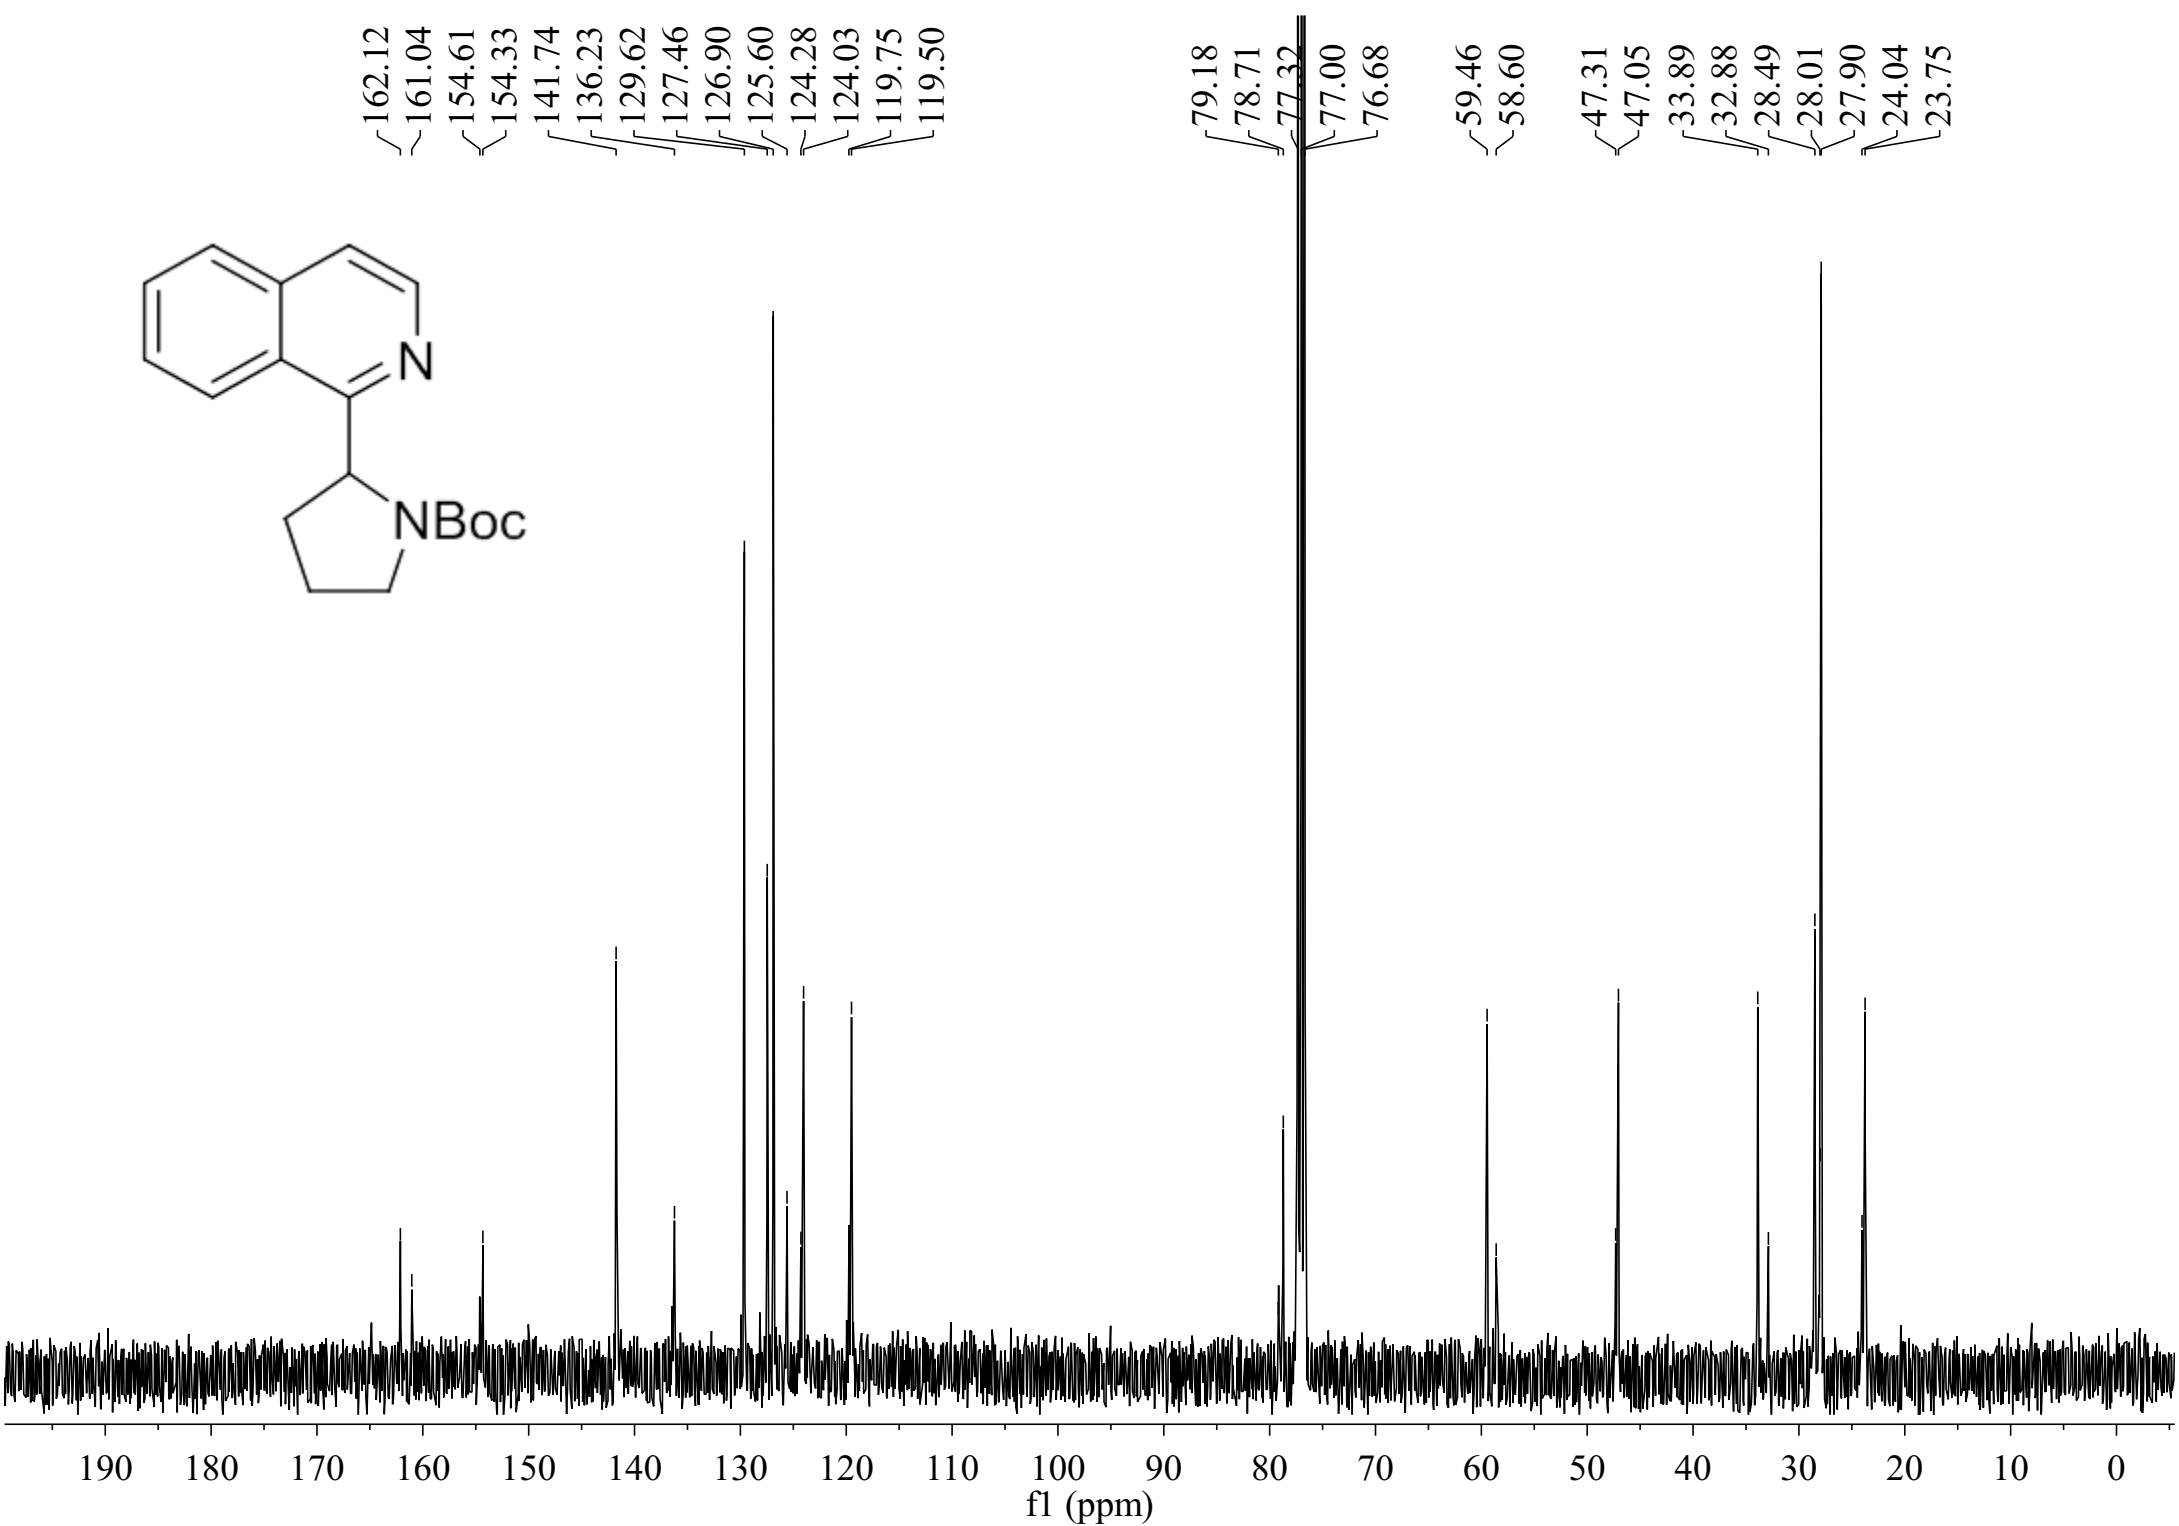

8.489  
8.475  
8.443  
8.428  
8.361  
8.340  
8.029  
8.008  
7.870  
7.850  
7.819  
7.799  
7.721  
7.703  
7.687  
7.670  
7.650  
7.616  
7.594  
7.591  
7.577  
7.270  
~5.222  
~5.110

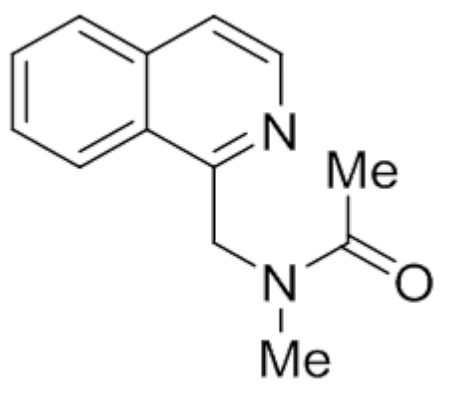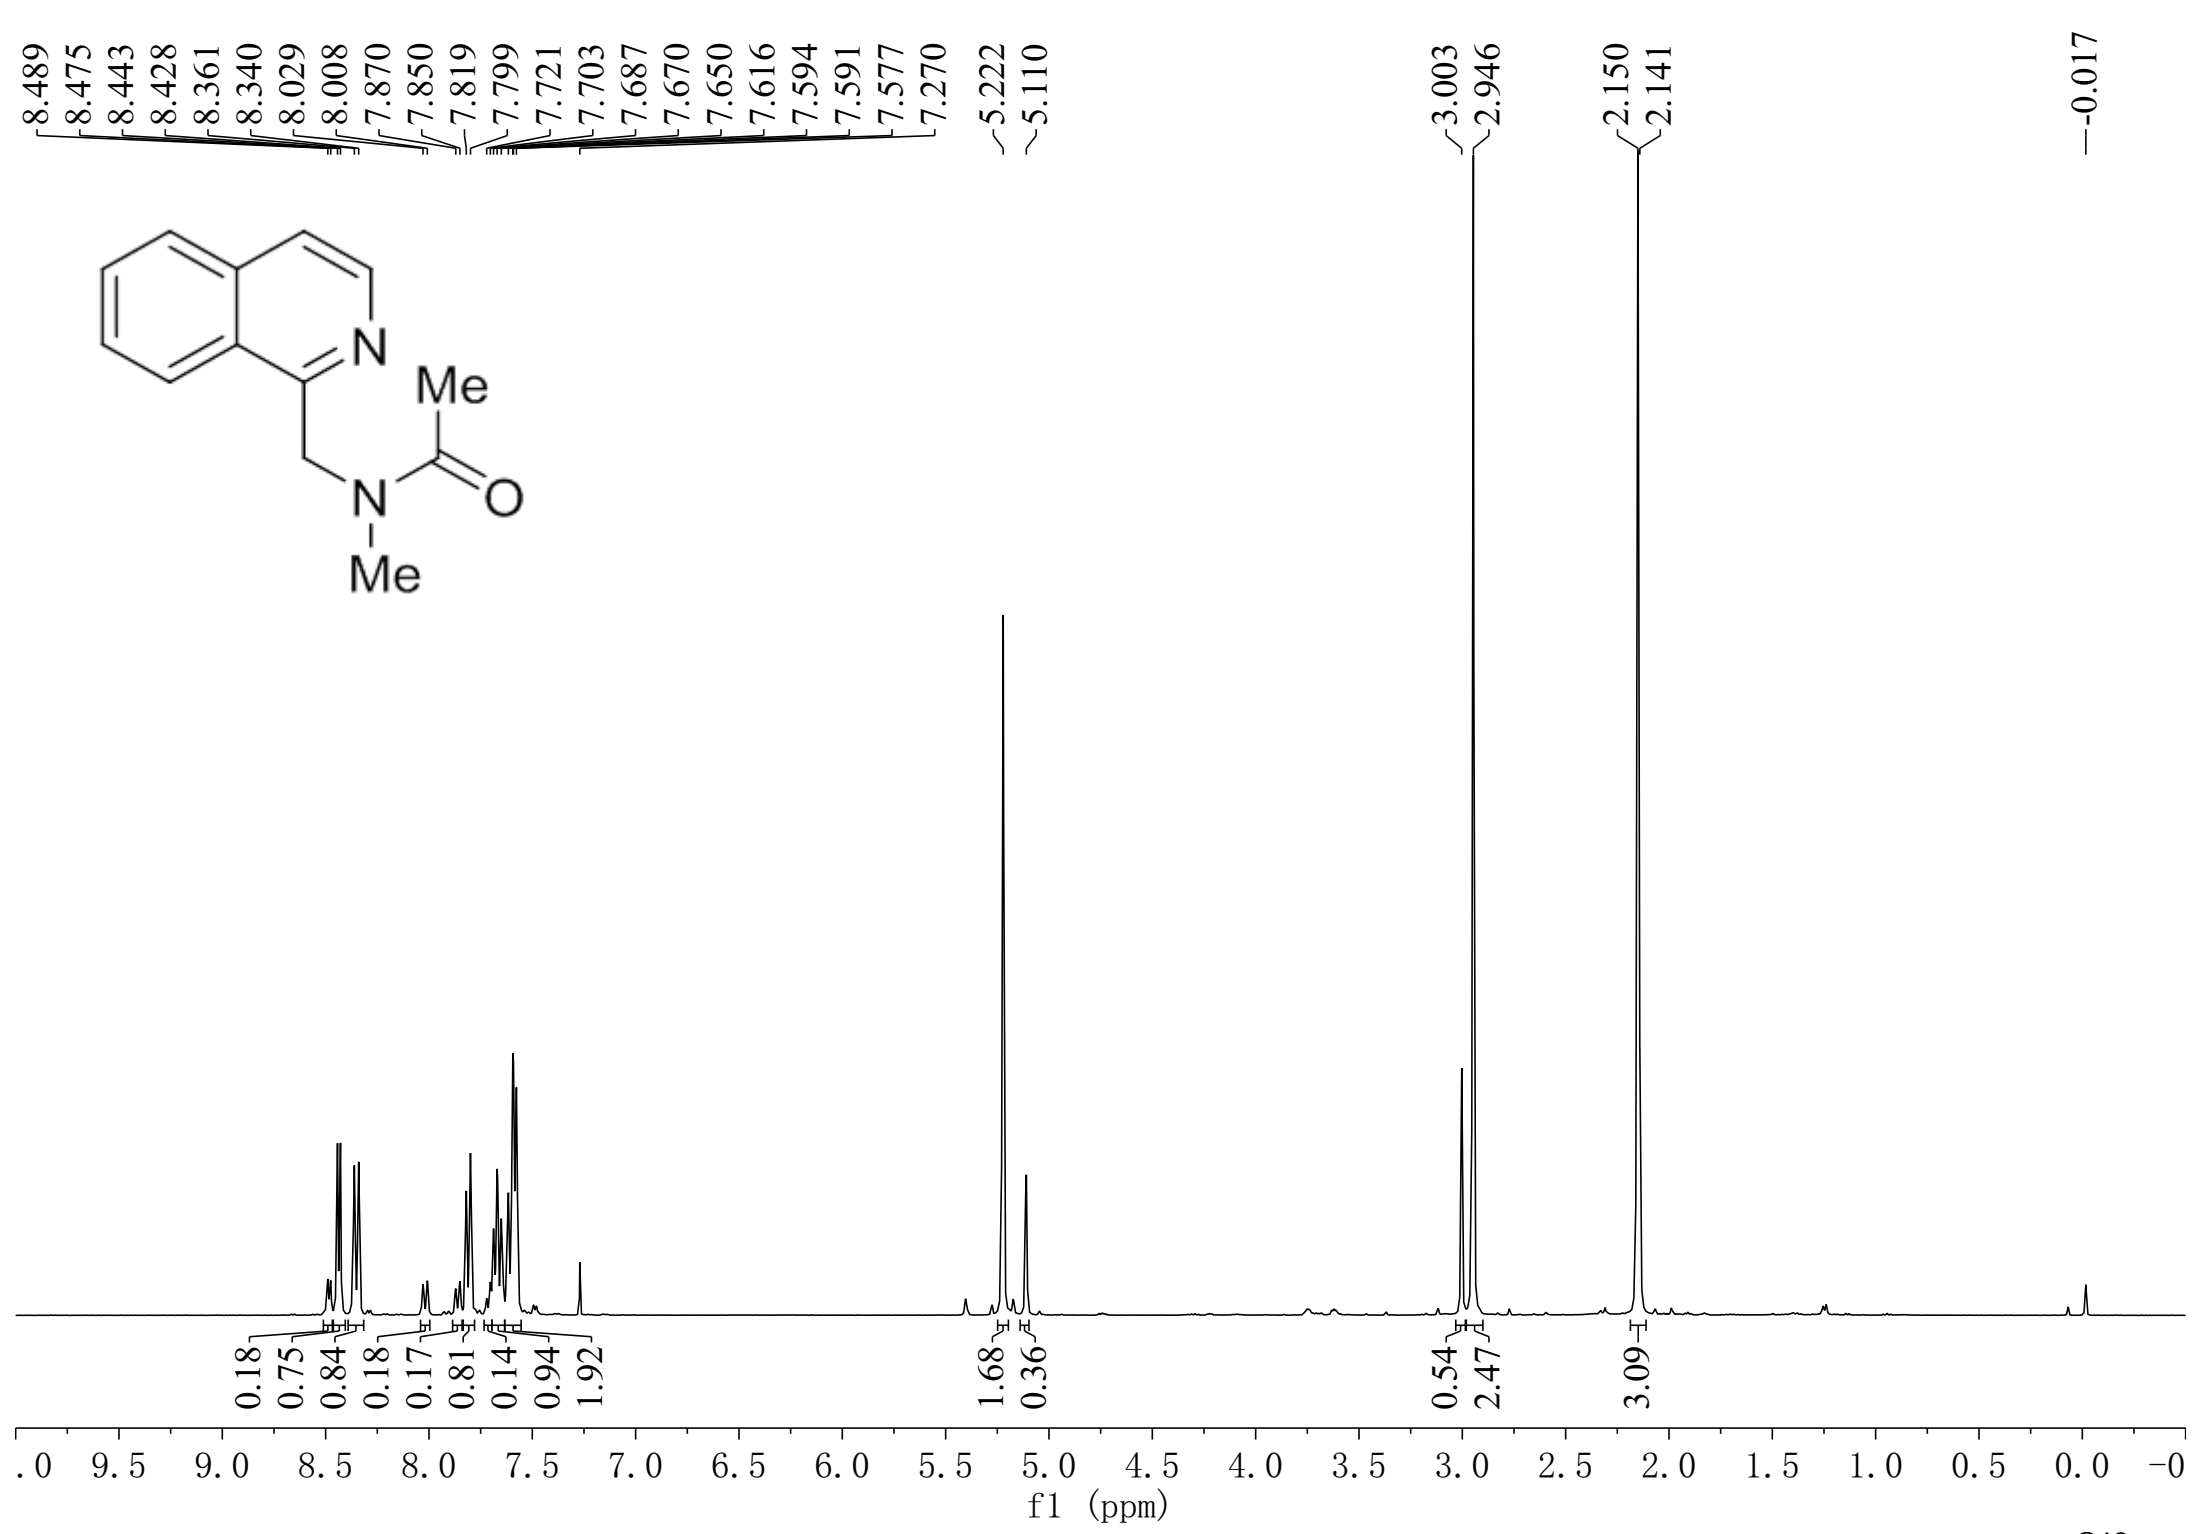

--0.017



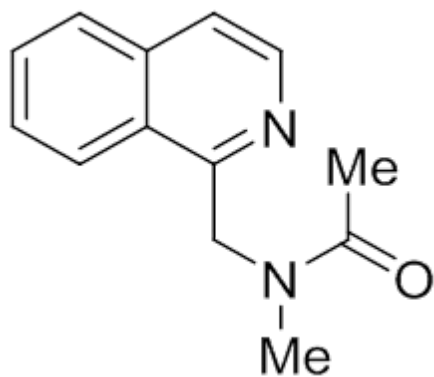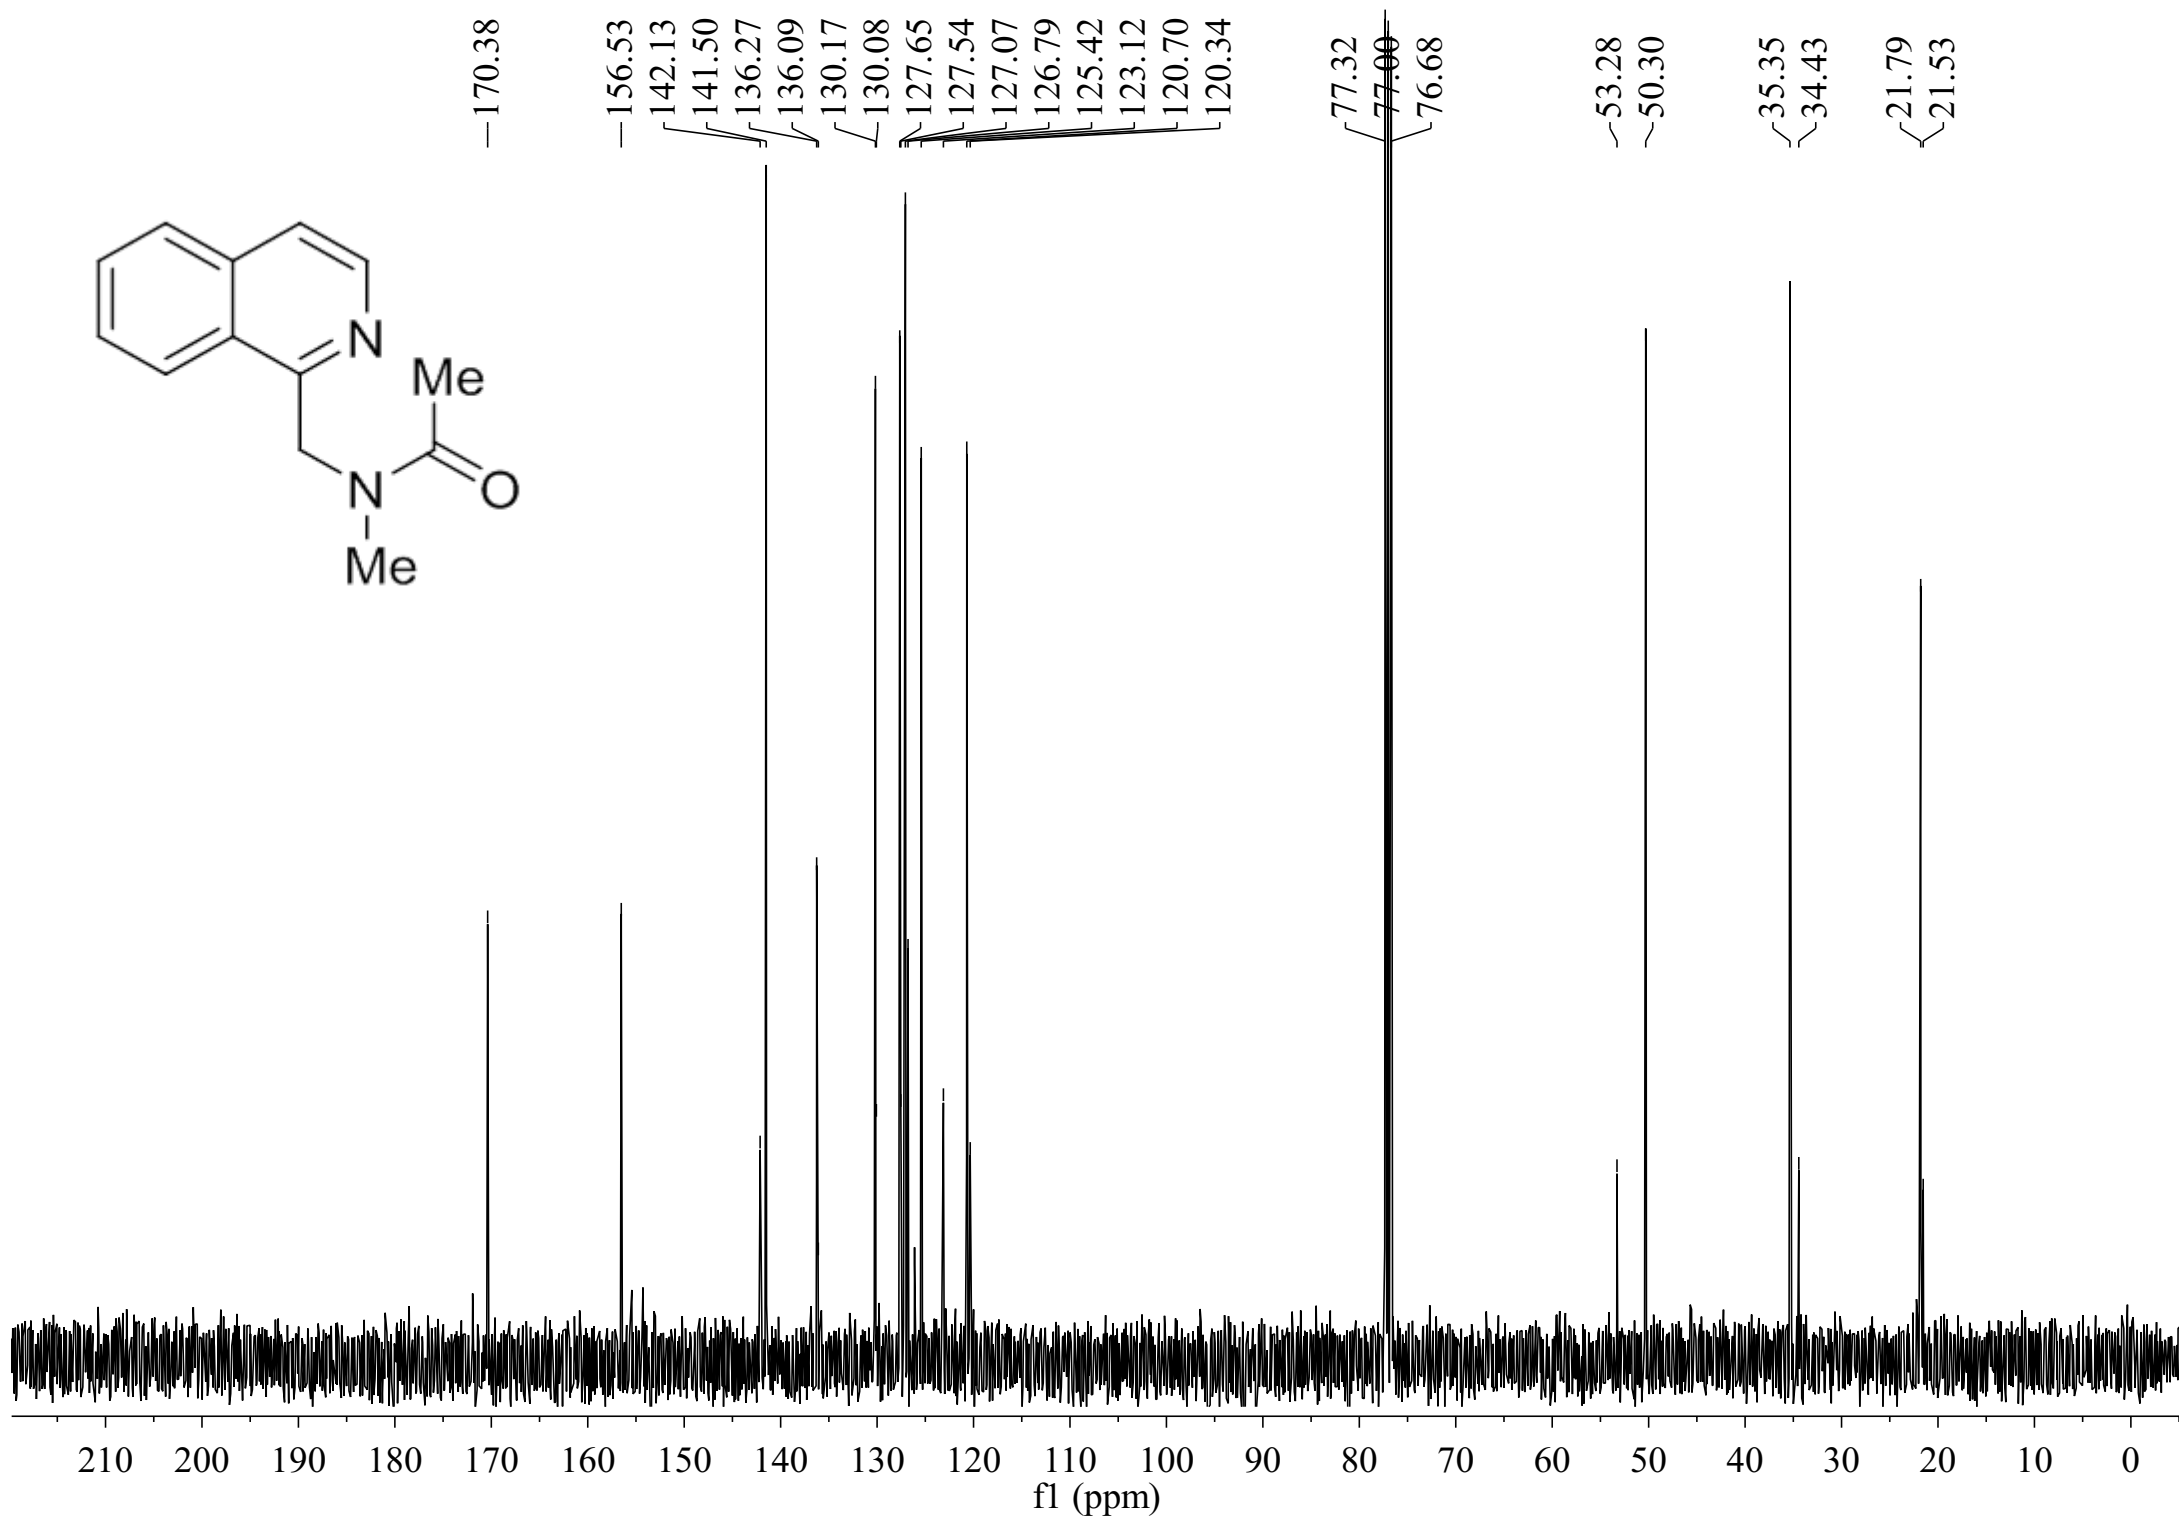

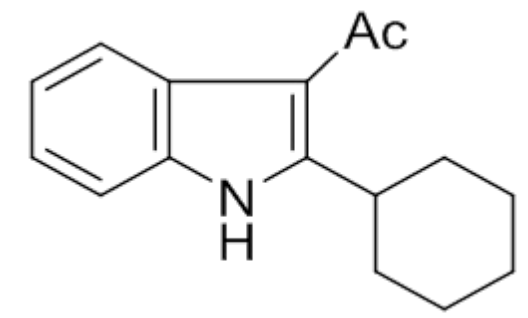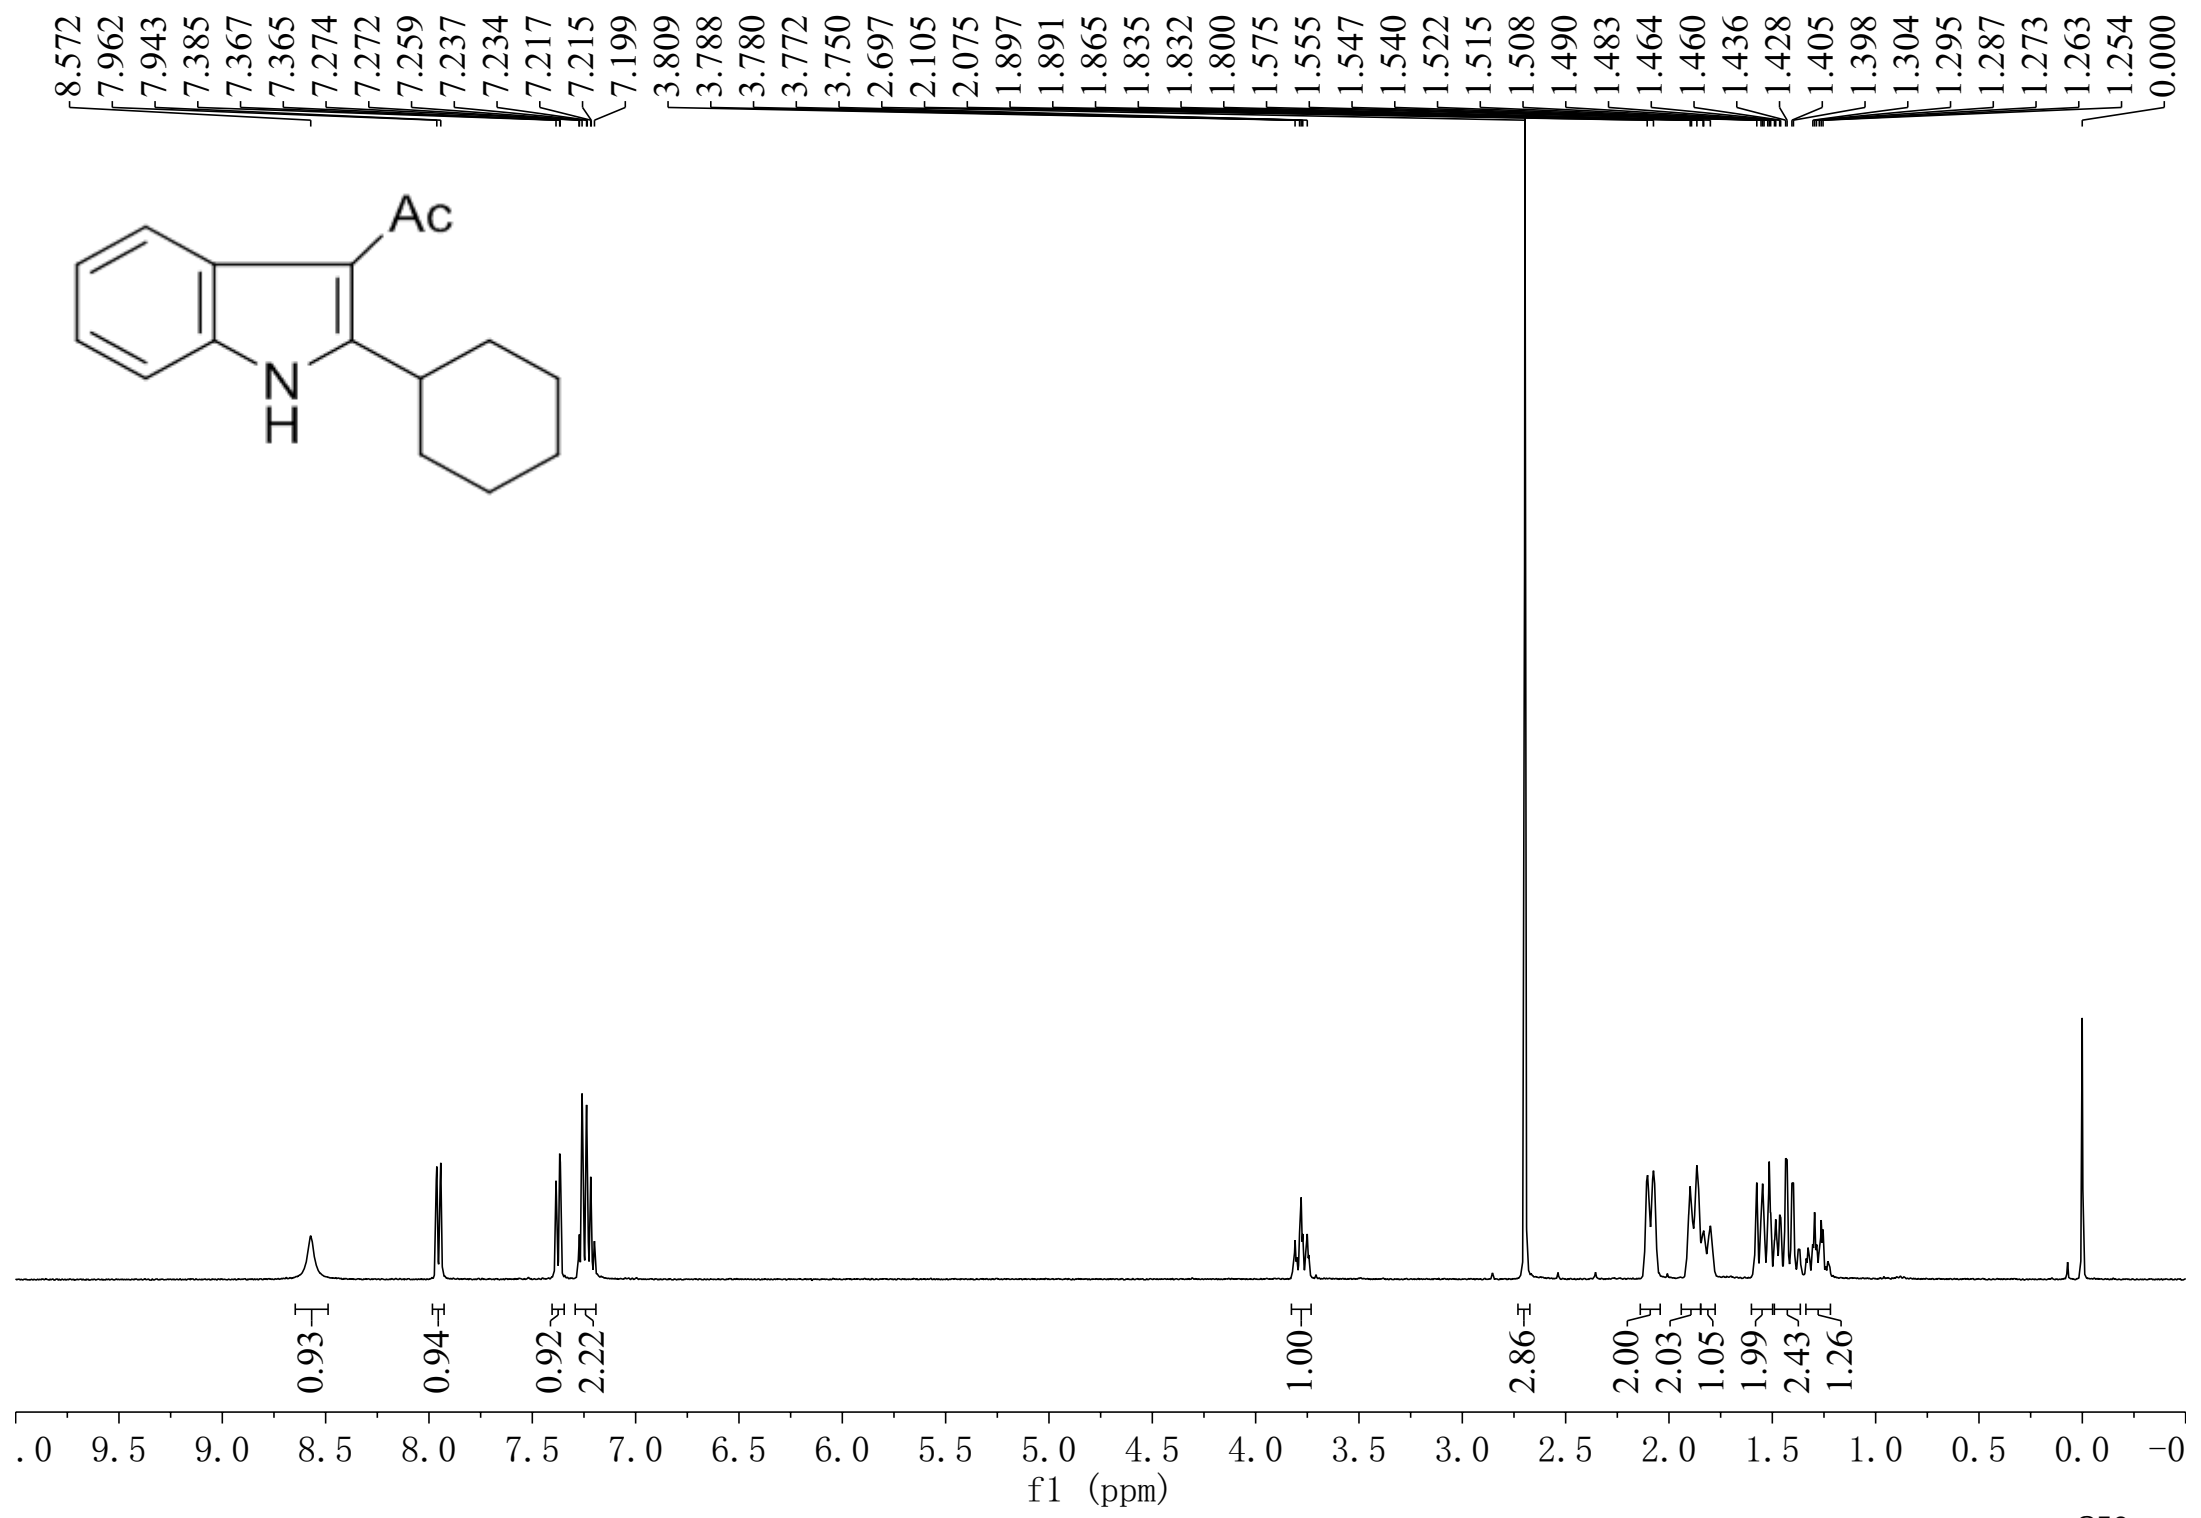

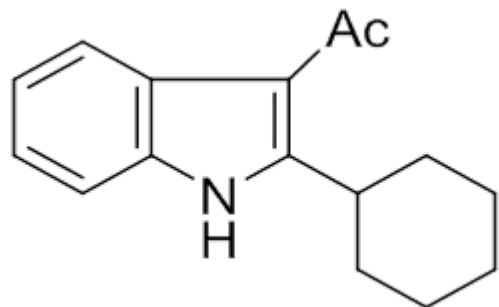

-194.79

-152.76

134.55

126.85

122.19

121.93

120.79

113.04

111.16

77.32

77.00

76.68

36.73

32.32

31.73

26.43

26.12

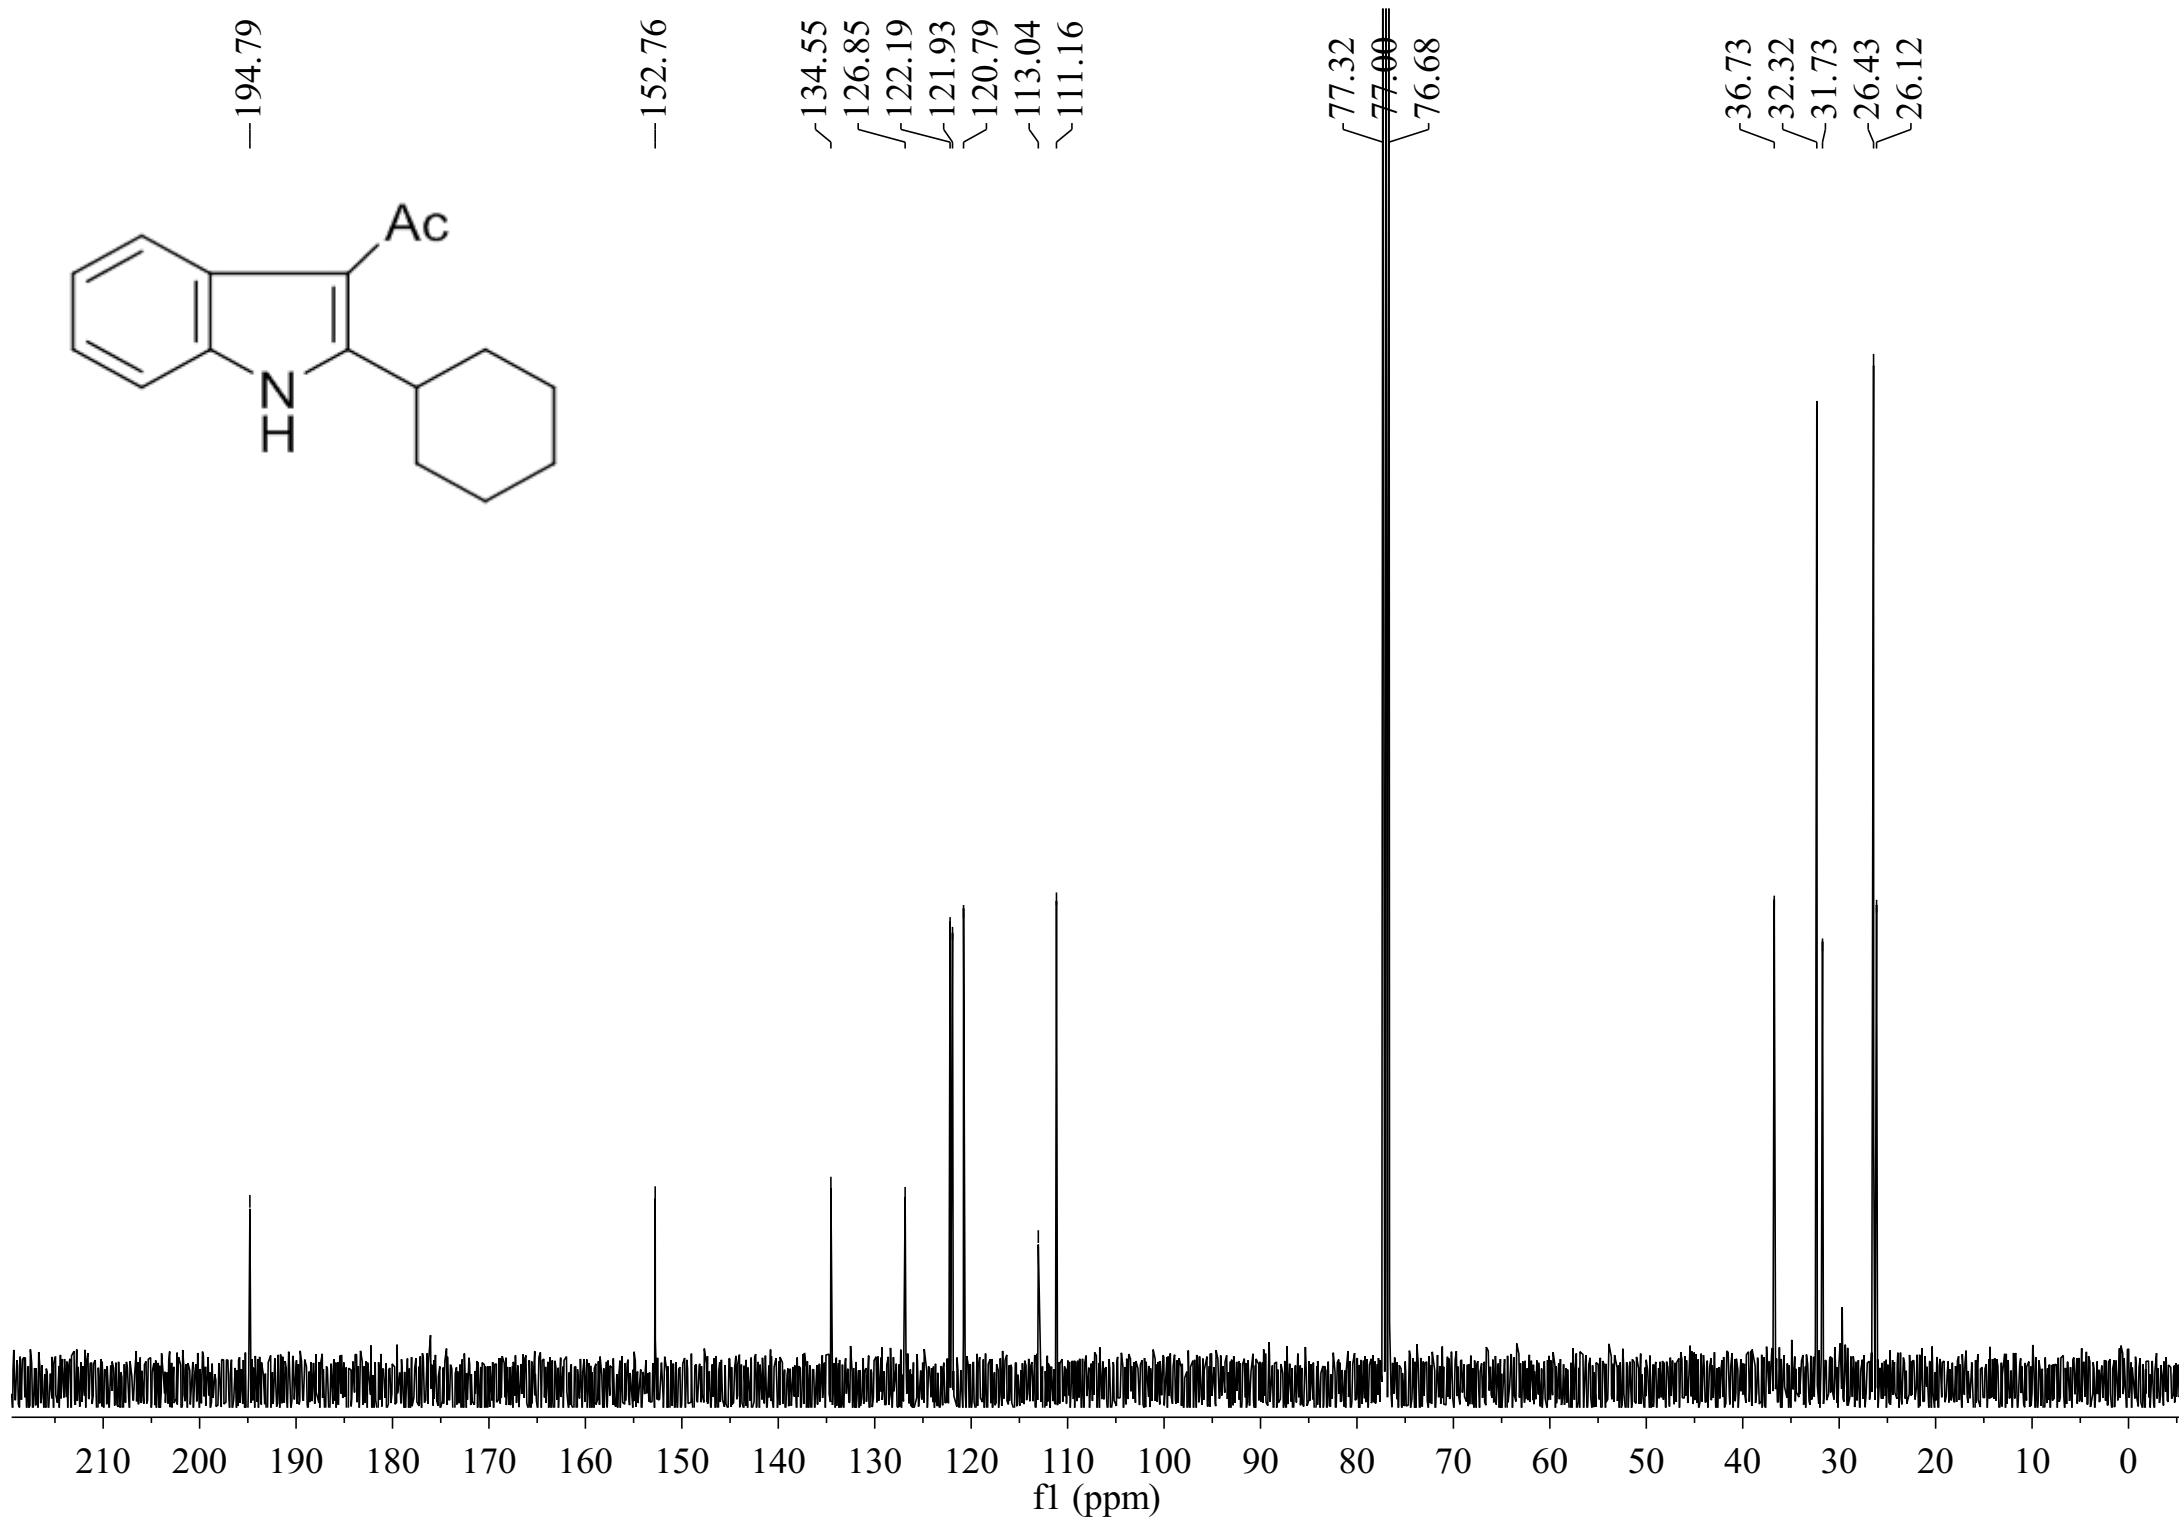

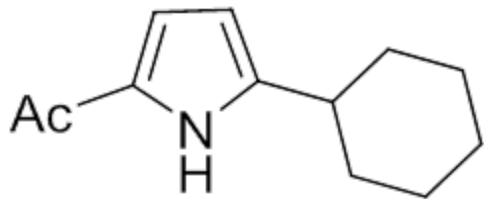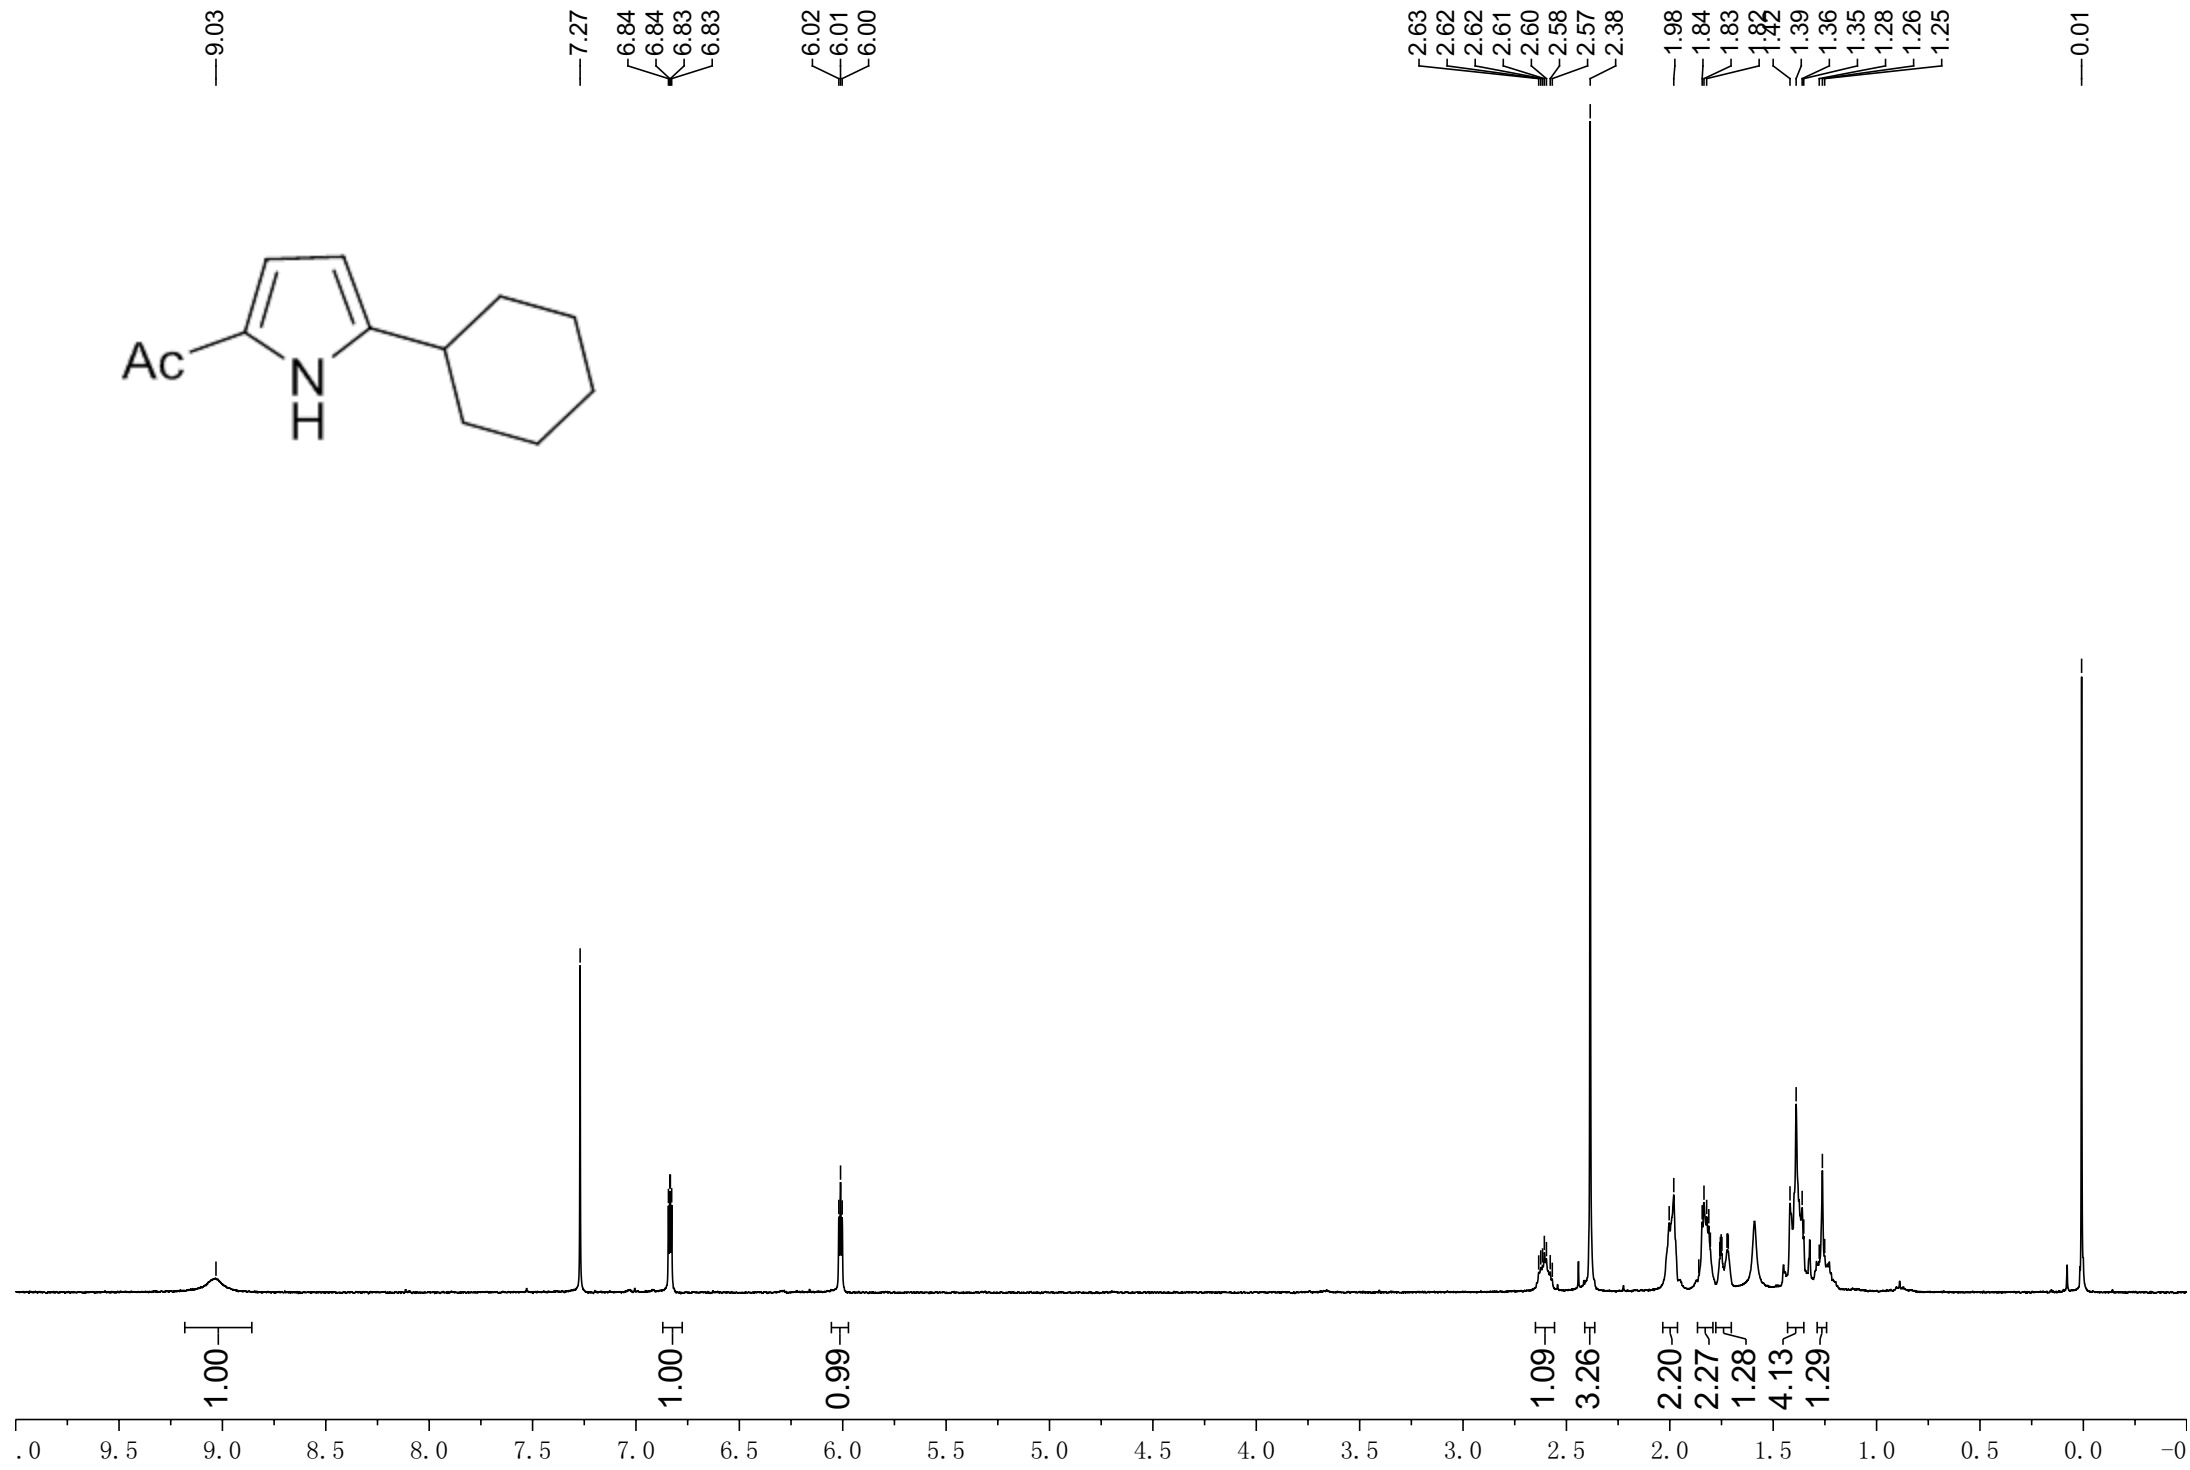

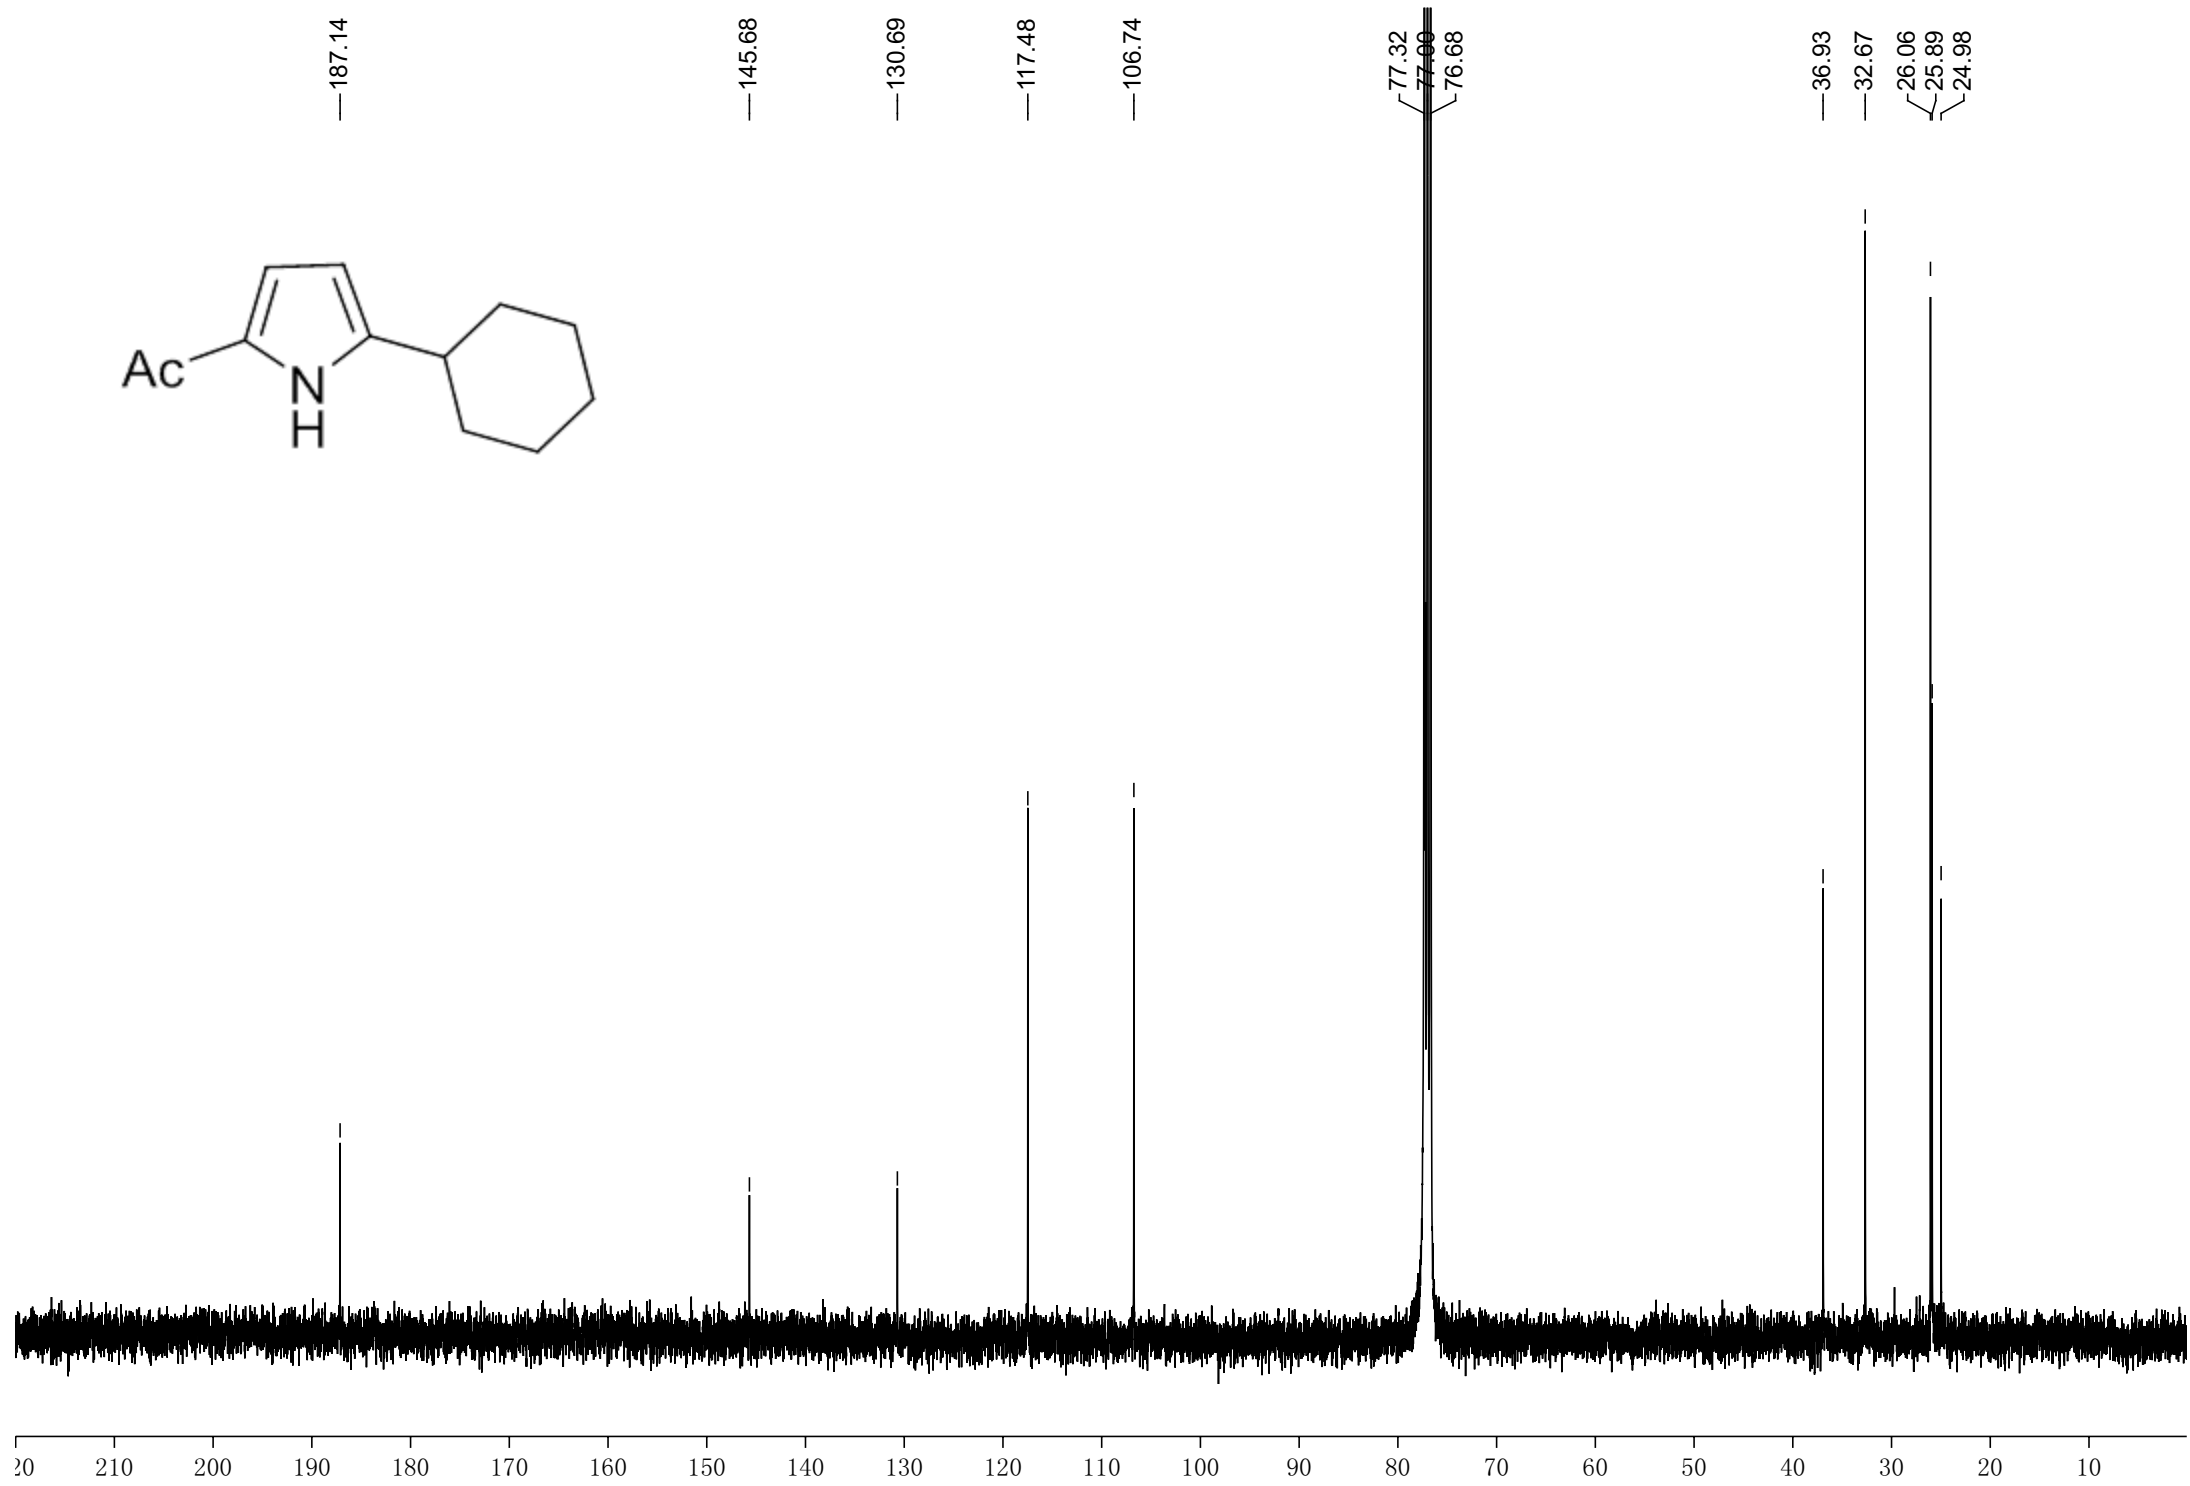

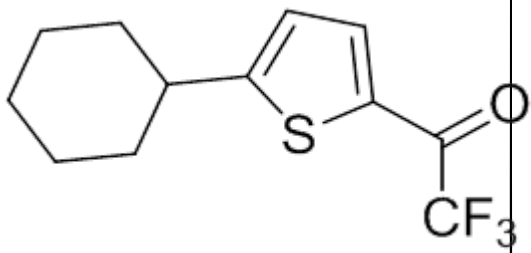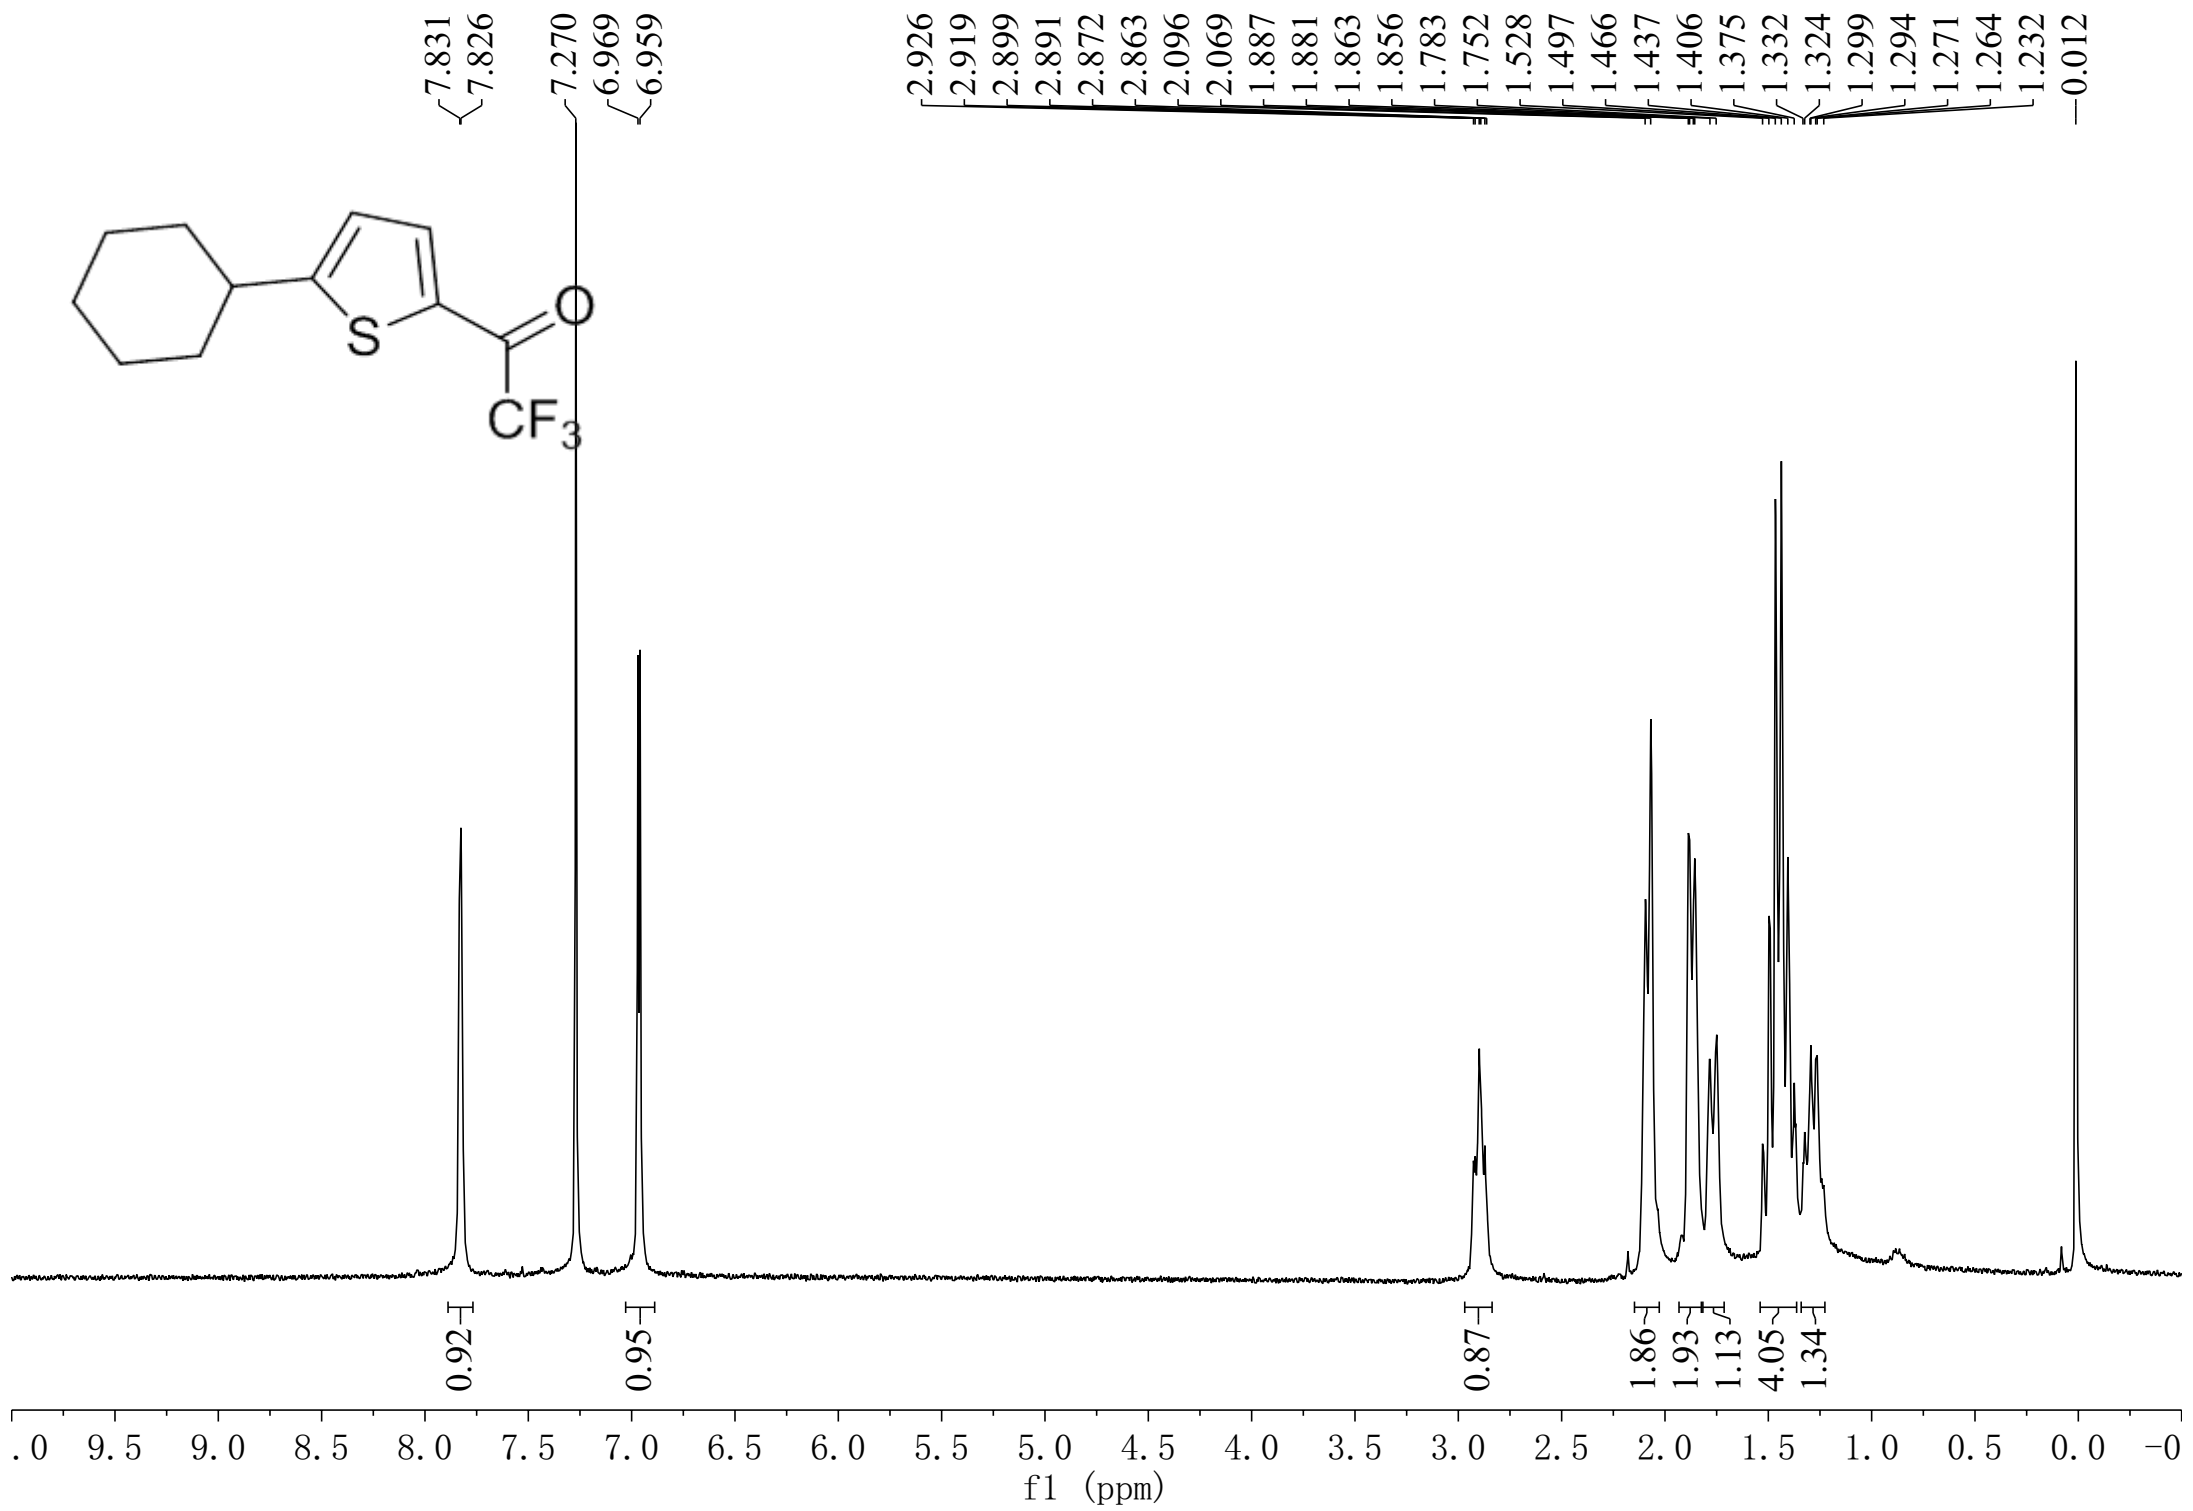

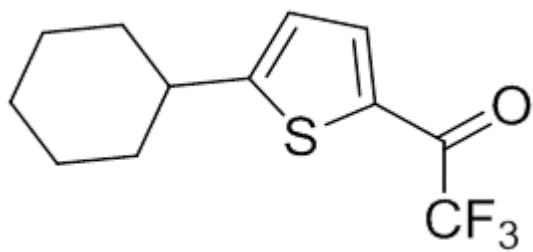

173.77  
173.41  
173.05  
172.69  
167.43

137.03  
137.00  
136.97  
136.94  
133.16  
124.90  
120.91  
118.02  
115.13  
112.25

77.32  
77.00  
76.68

-40.34  
-34.95  
-26.16  
-25.61

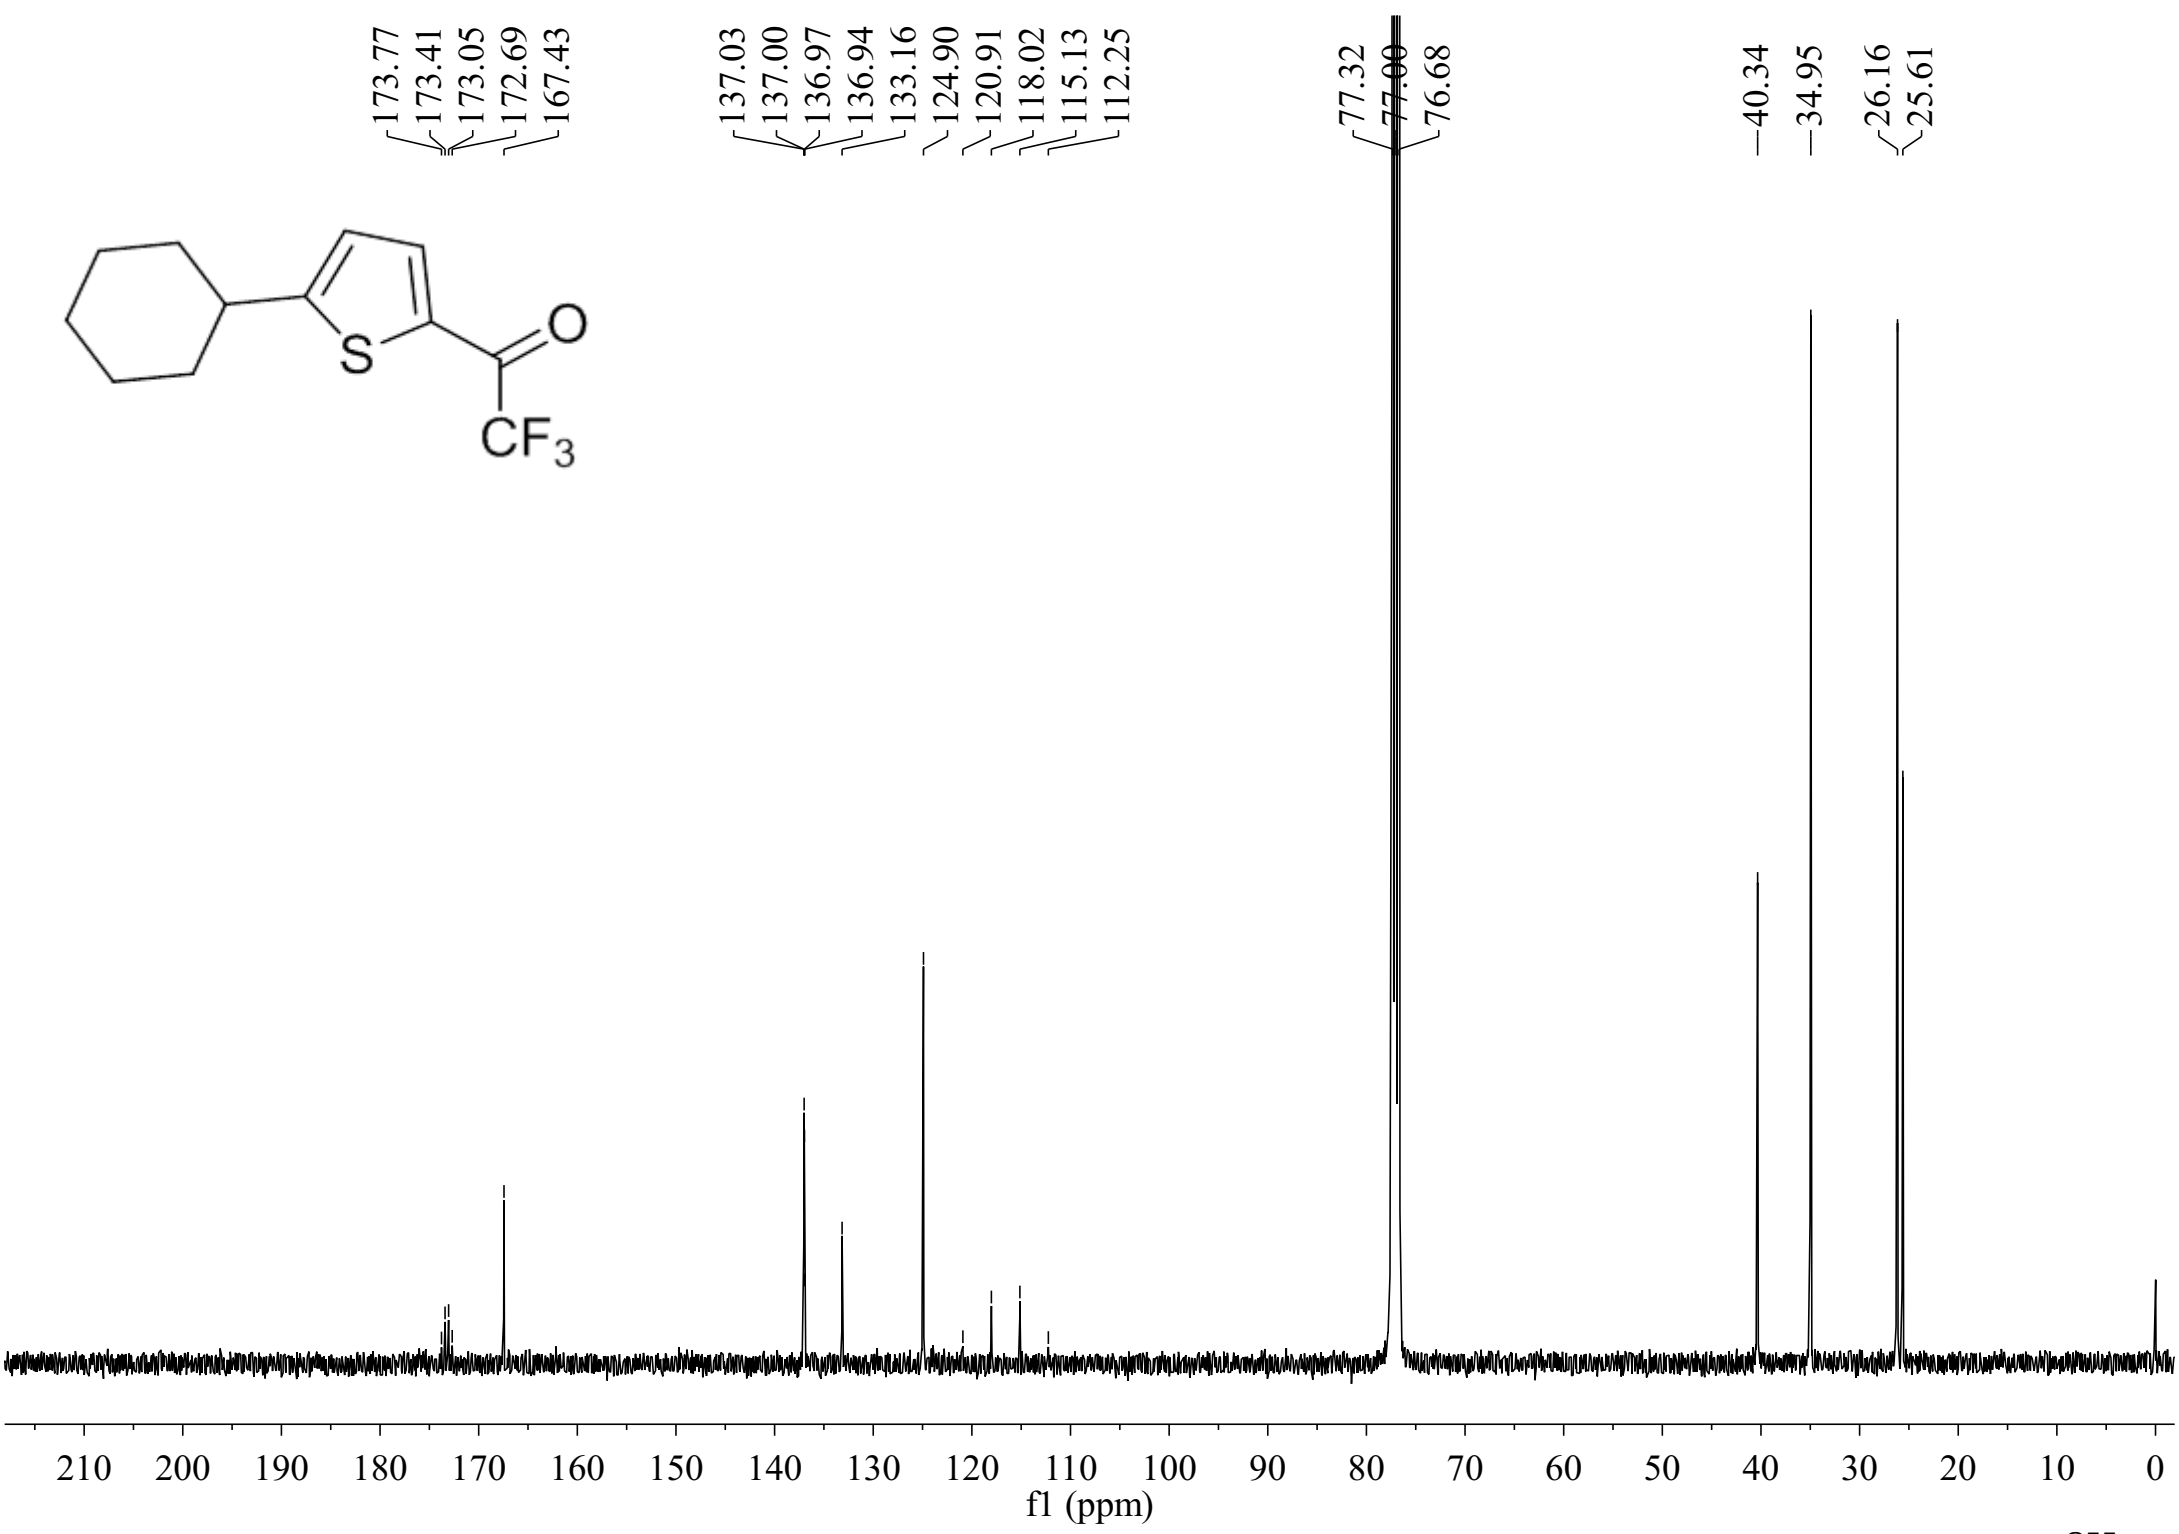

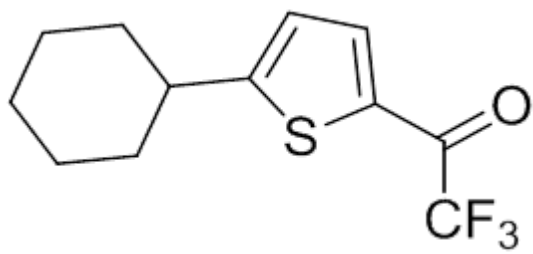

--71.986

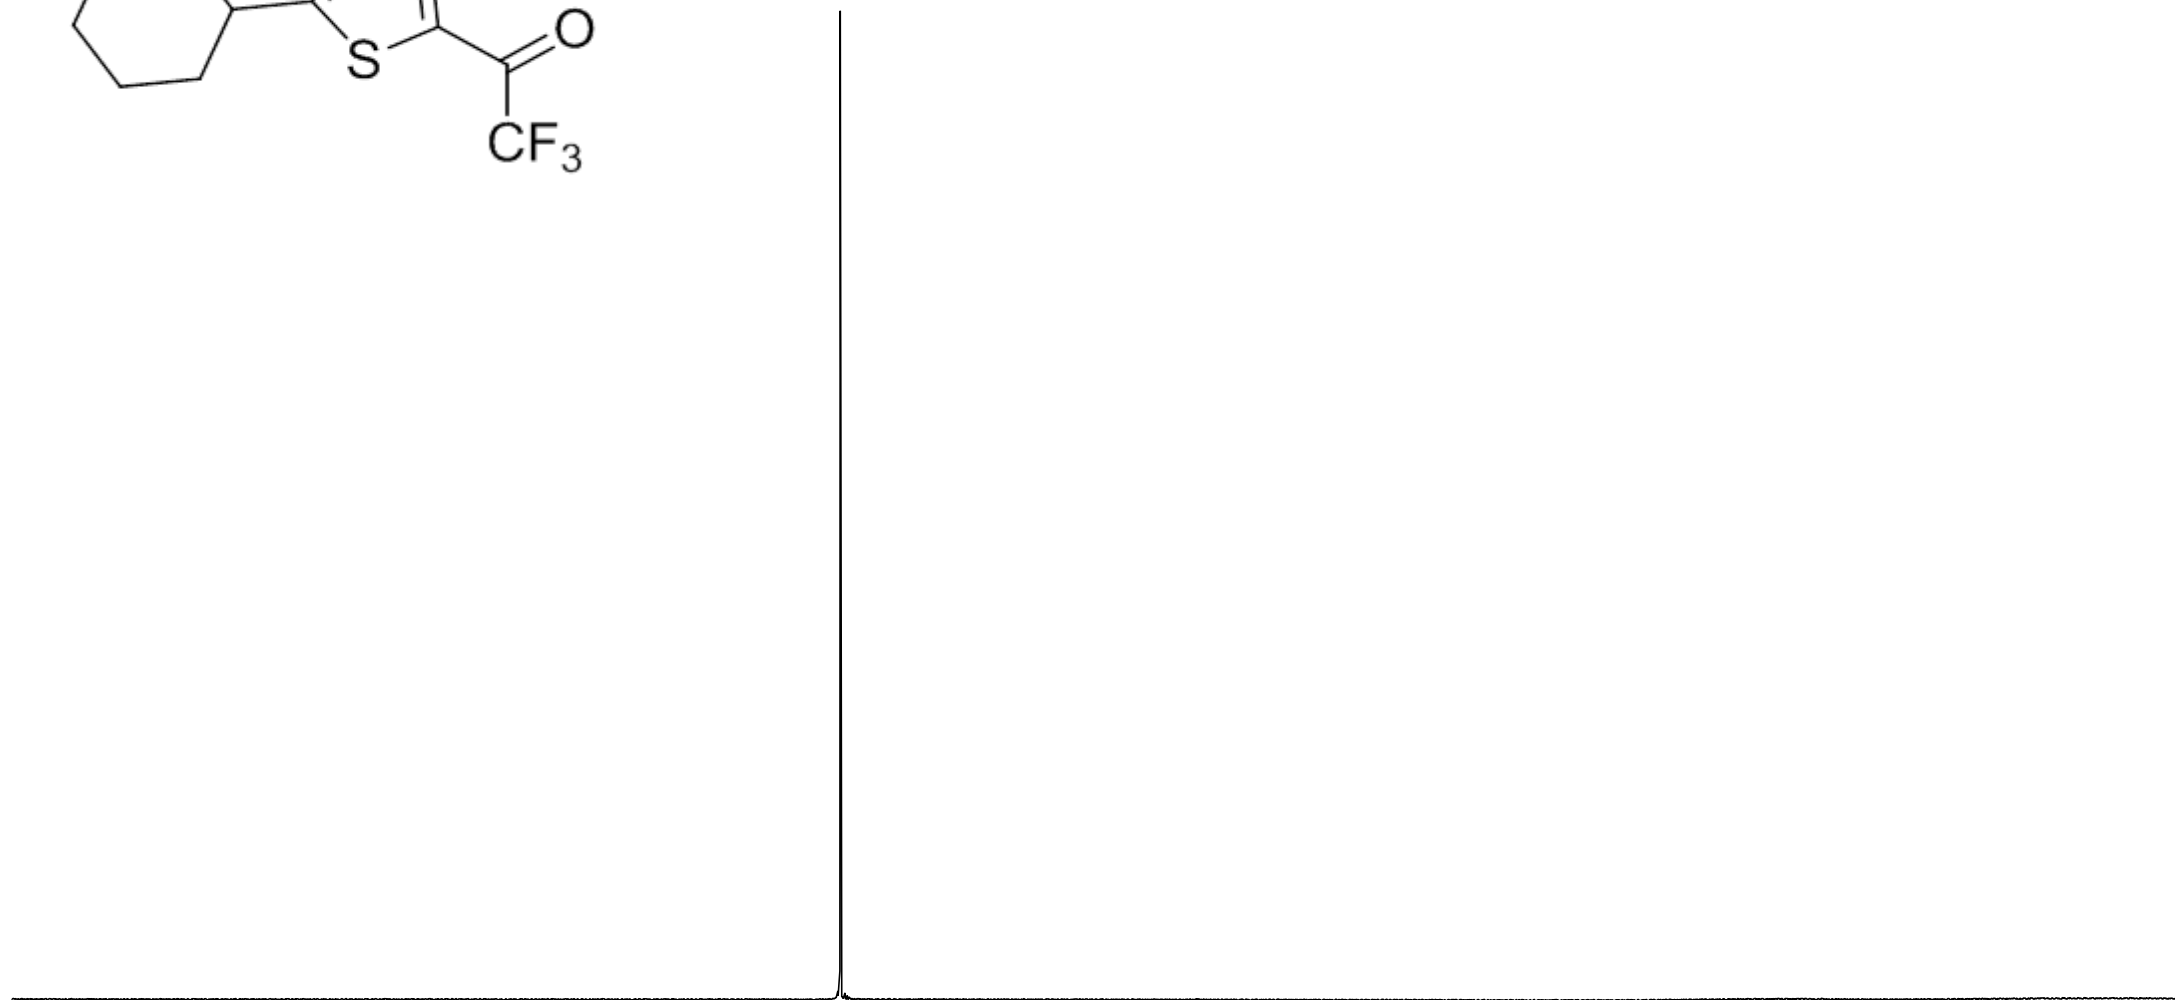

10 0 -10 -20 -30 -40 -50 -60 -70 -80 -90 -100 -110 -120 -130 -140 -150 -160 -170 -180 -190 -200 -210

f1 (ppm)



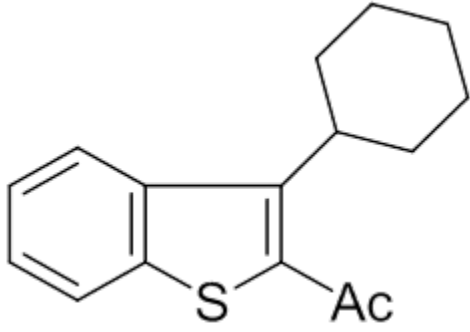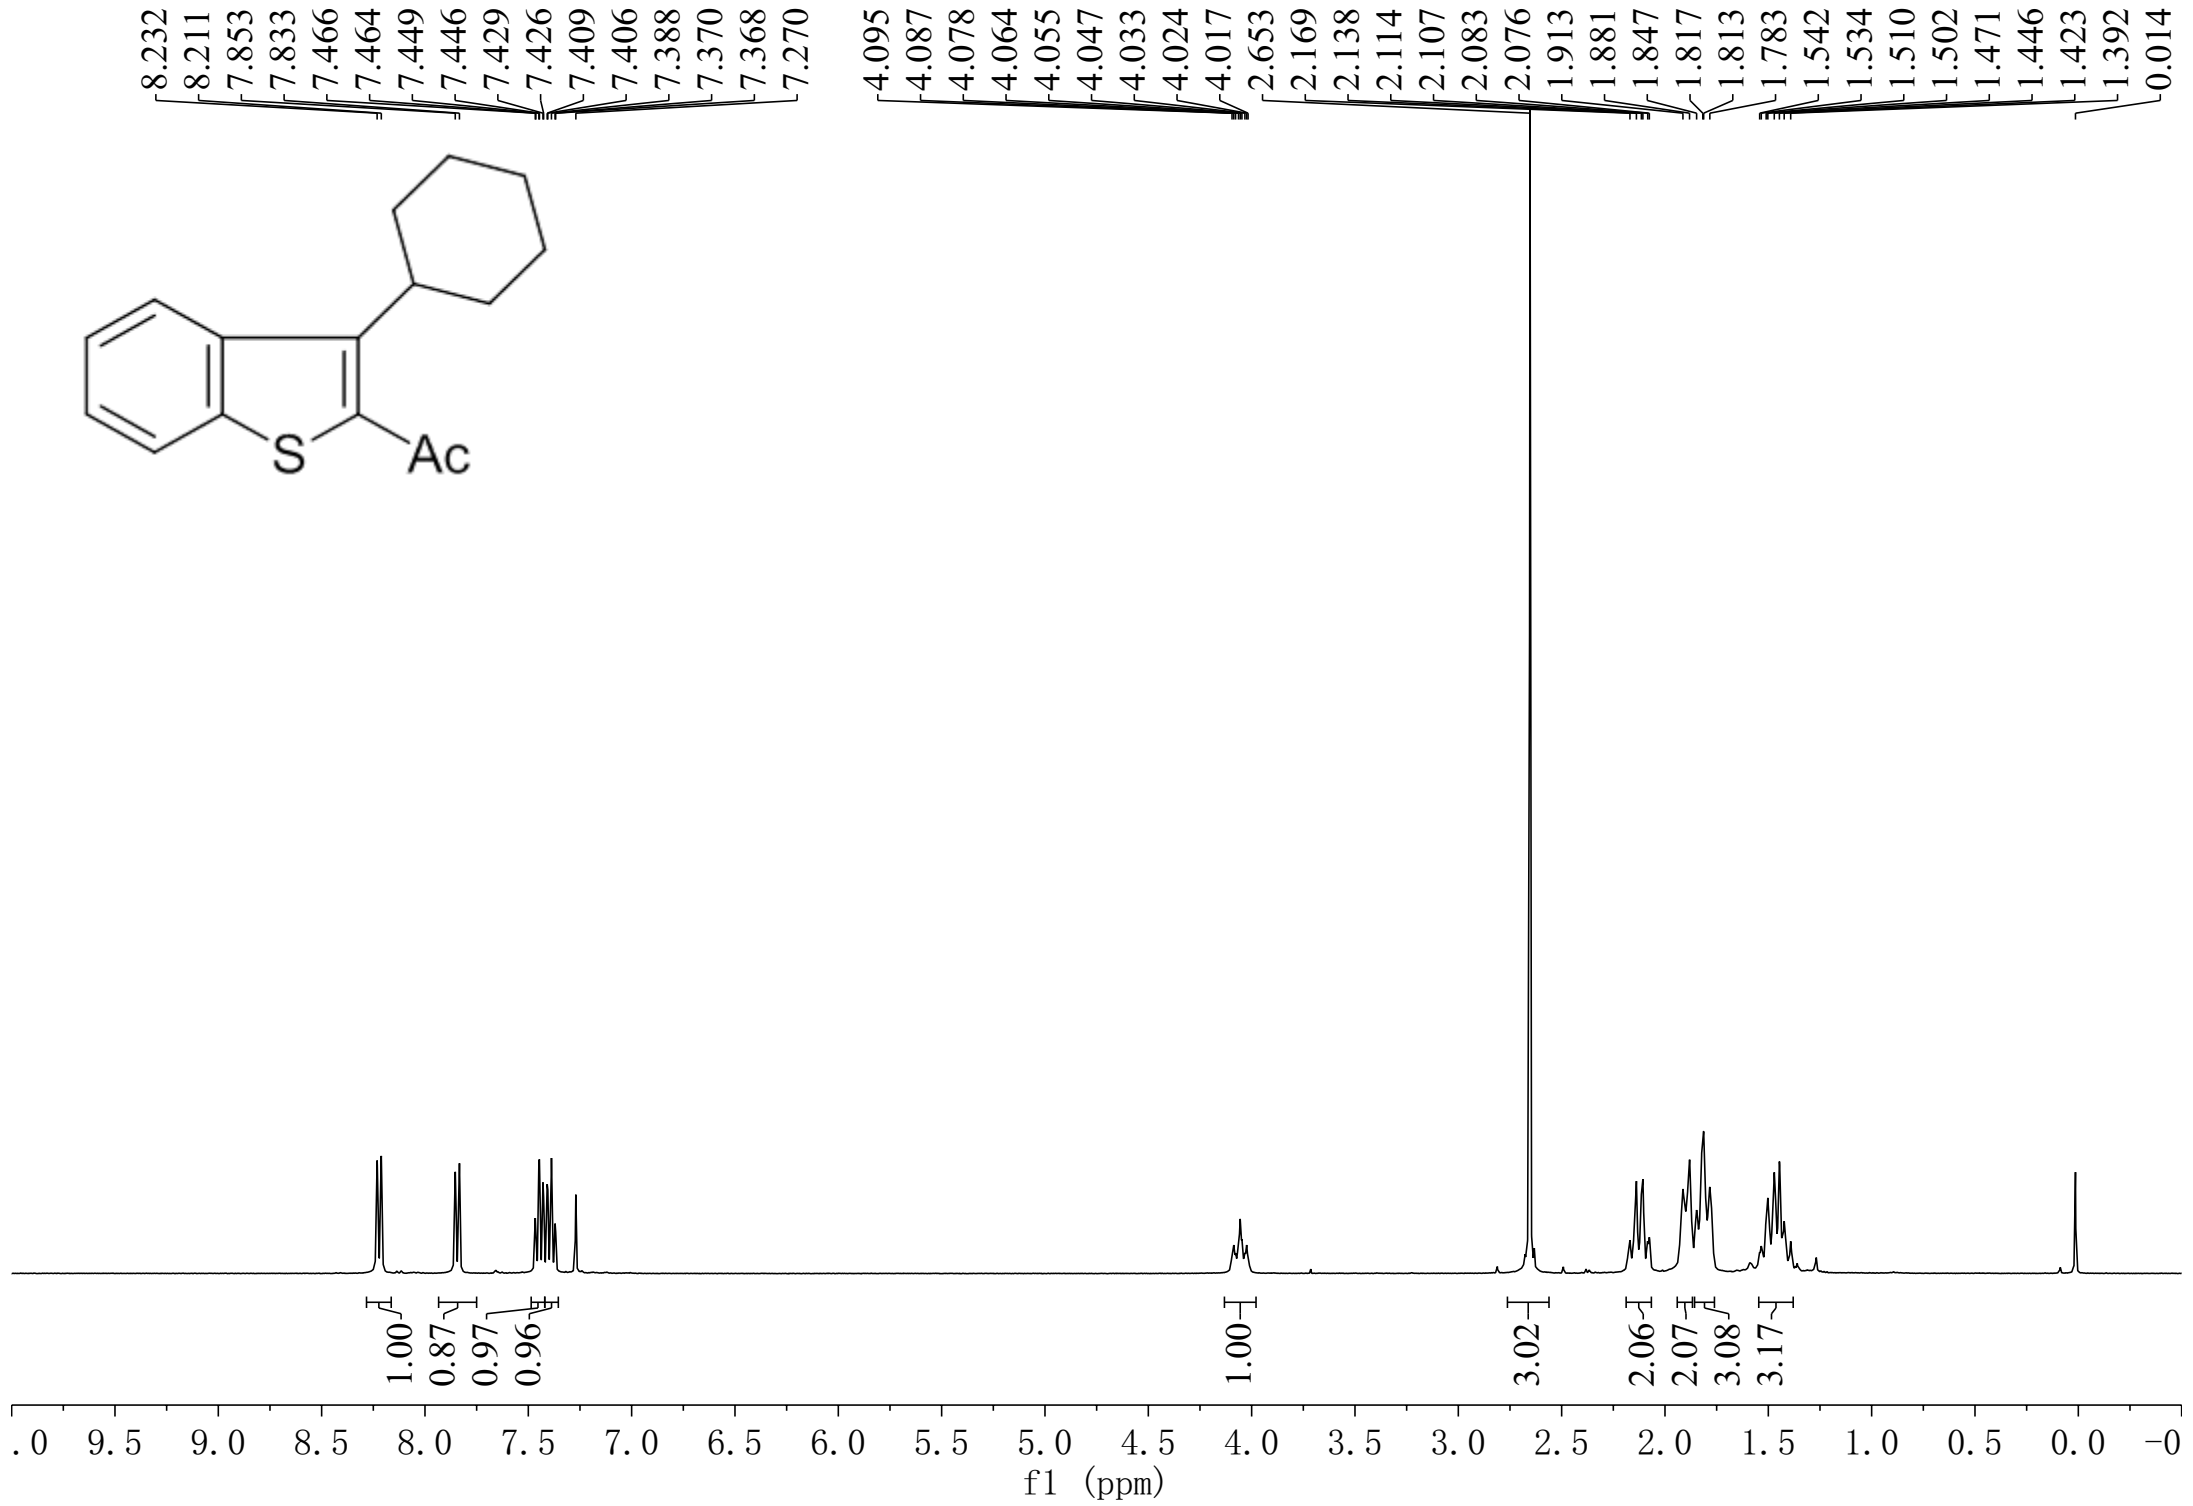

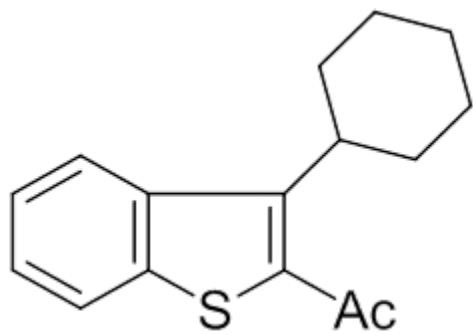

-193.72

148.28  
140.35  
139.19  
134.89  
126.67  
126.26  
124.03  
122.93

77.32  
77.00  
76.68

38.73  
31.31  
30.99  
27.00  
26.15

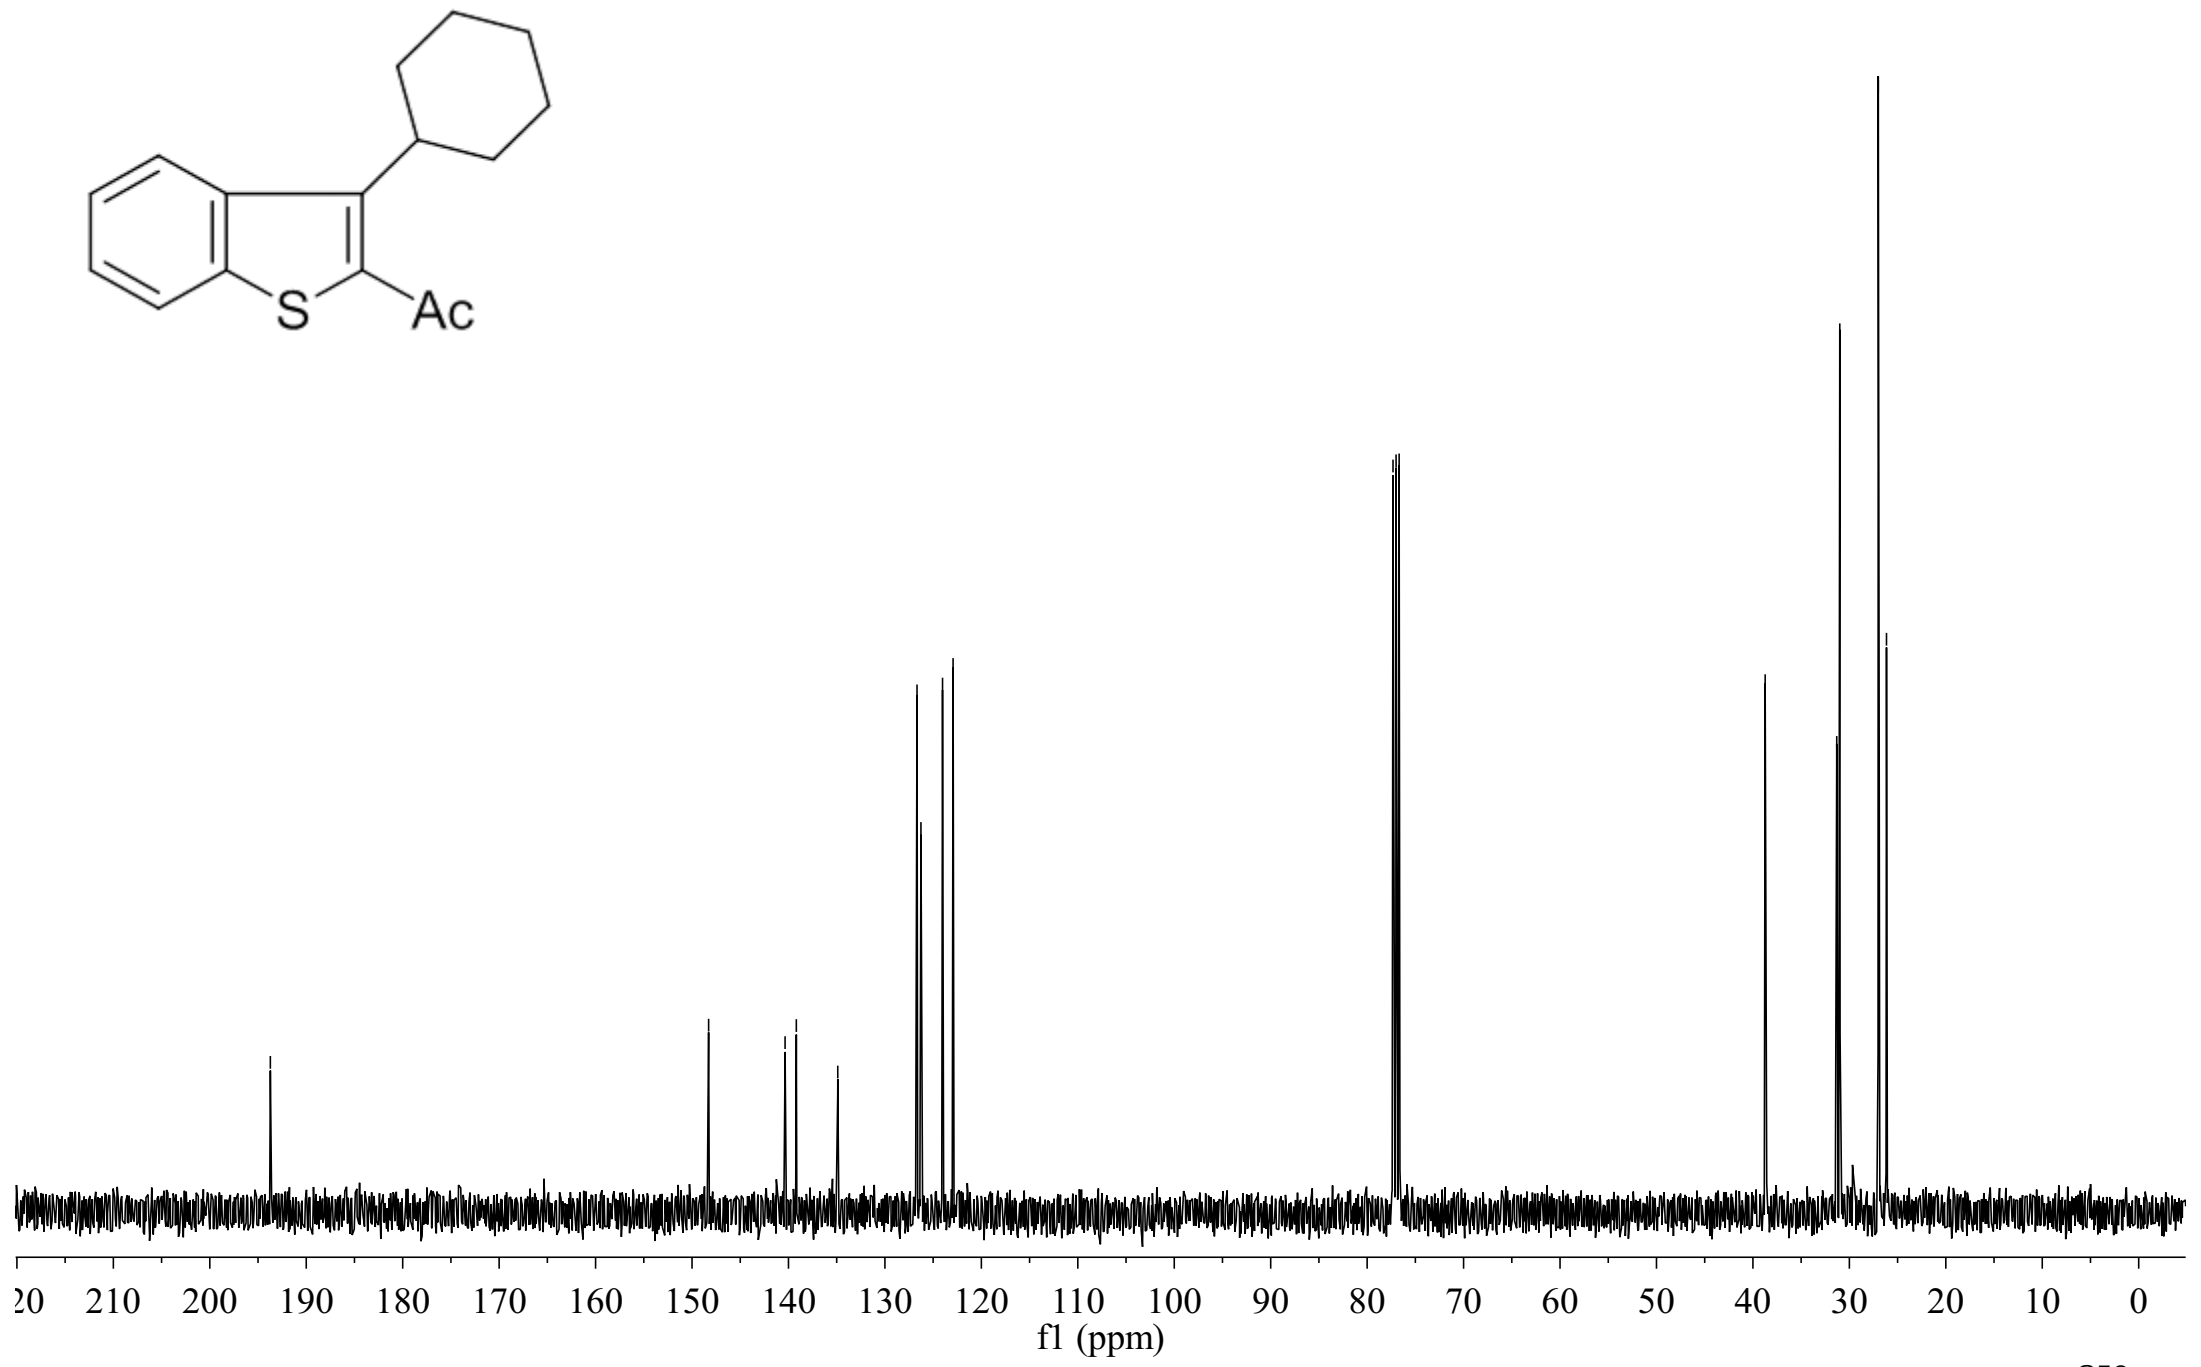

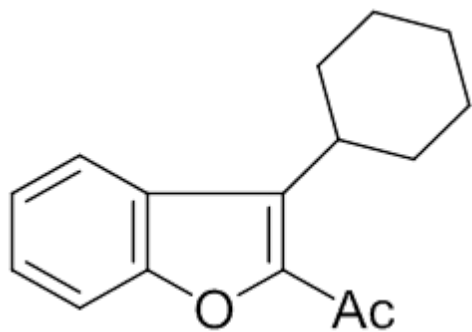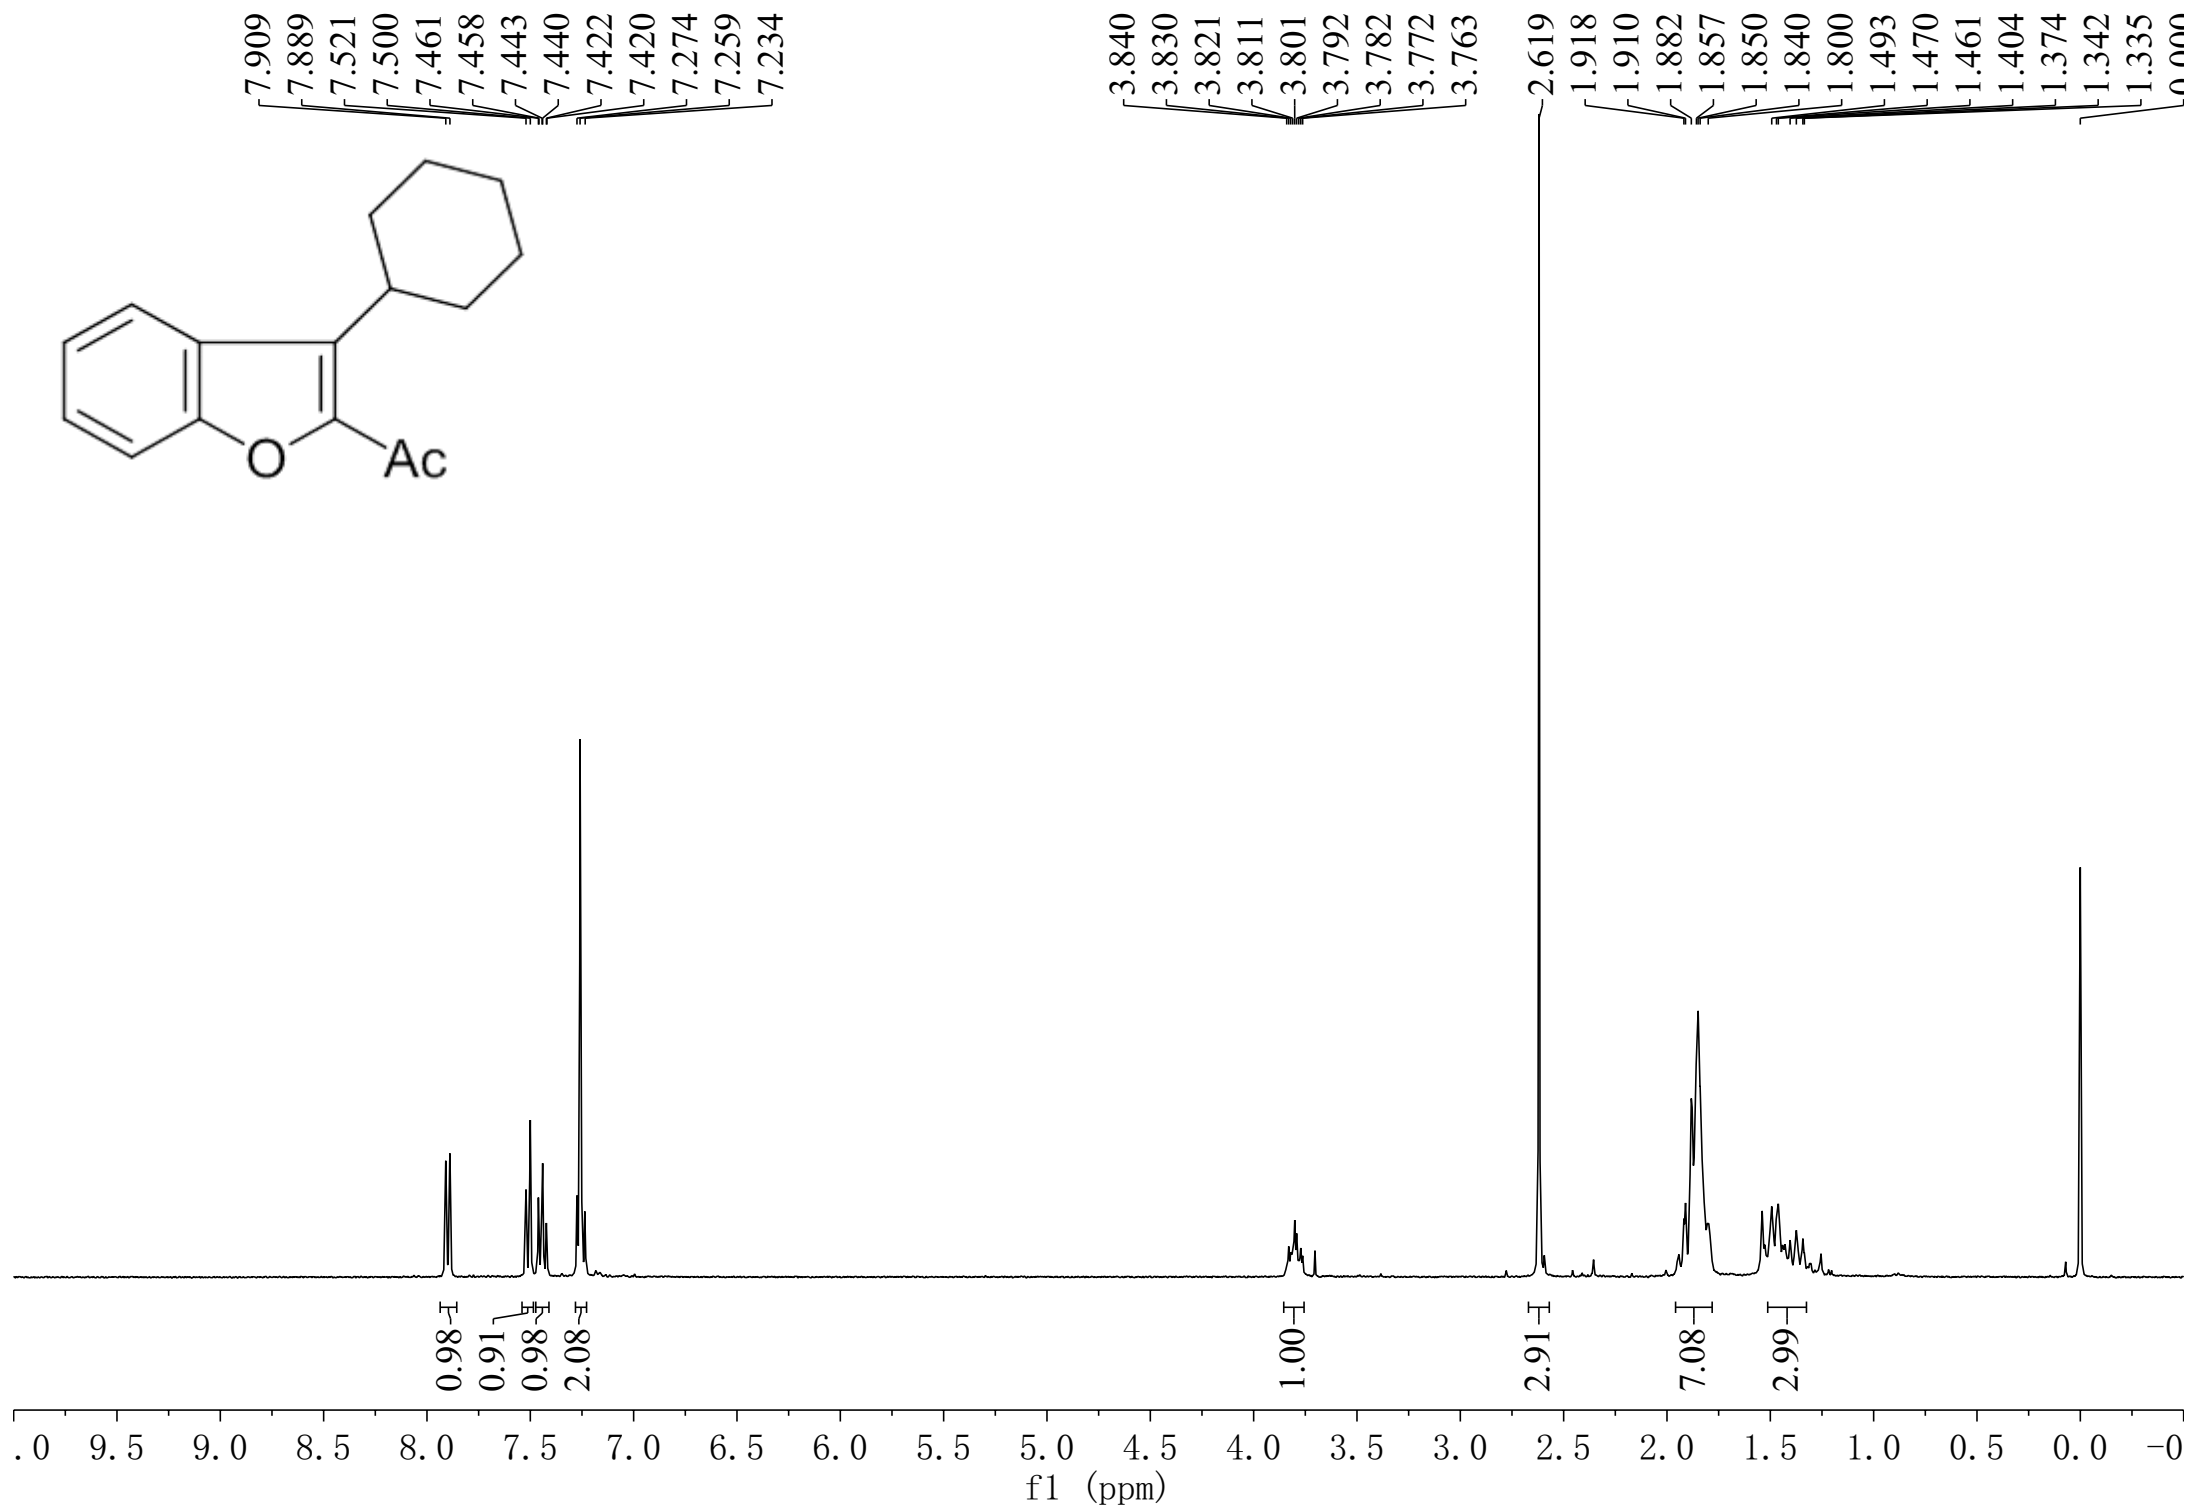

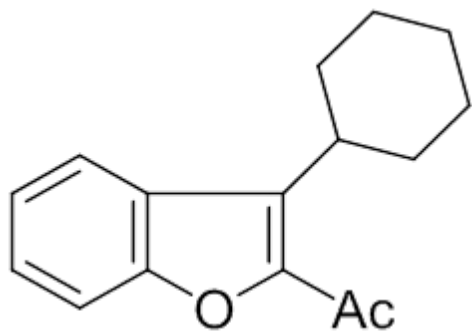

-191.76

-154.35

-146.94

133.34

127.68

127.60

123.78

122.75

-112.36

77.32

77.00

76.68

35.22

31.92

28.33

26.64

26.17

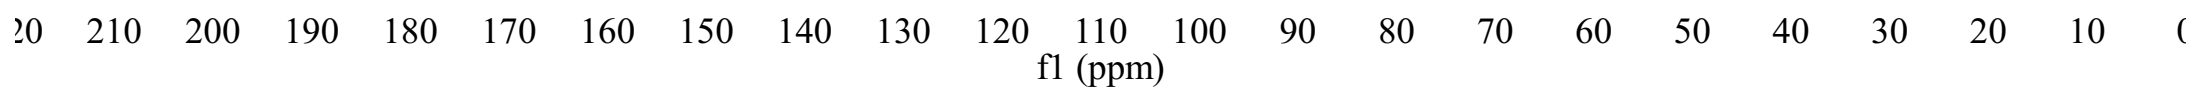

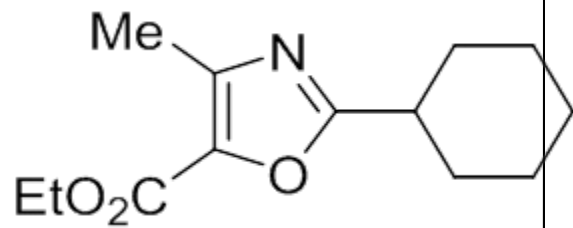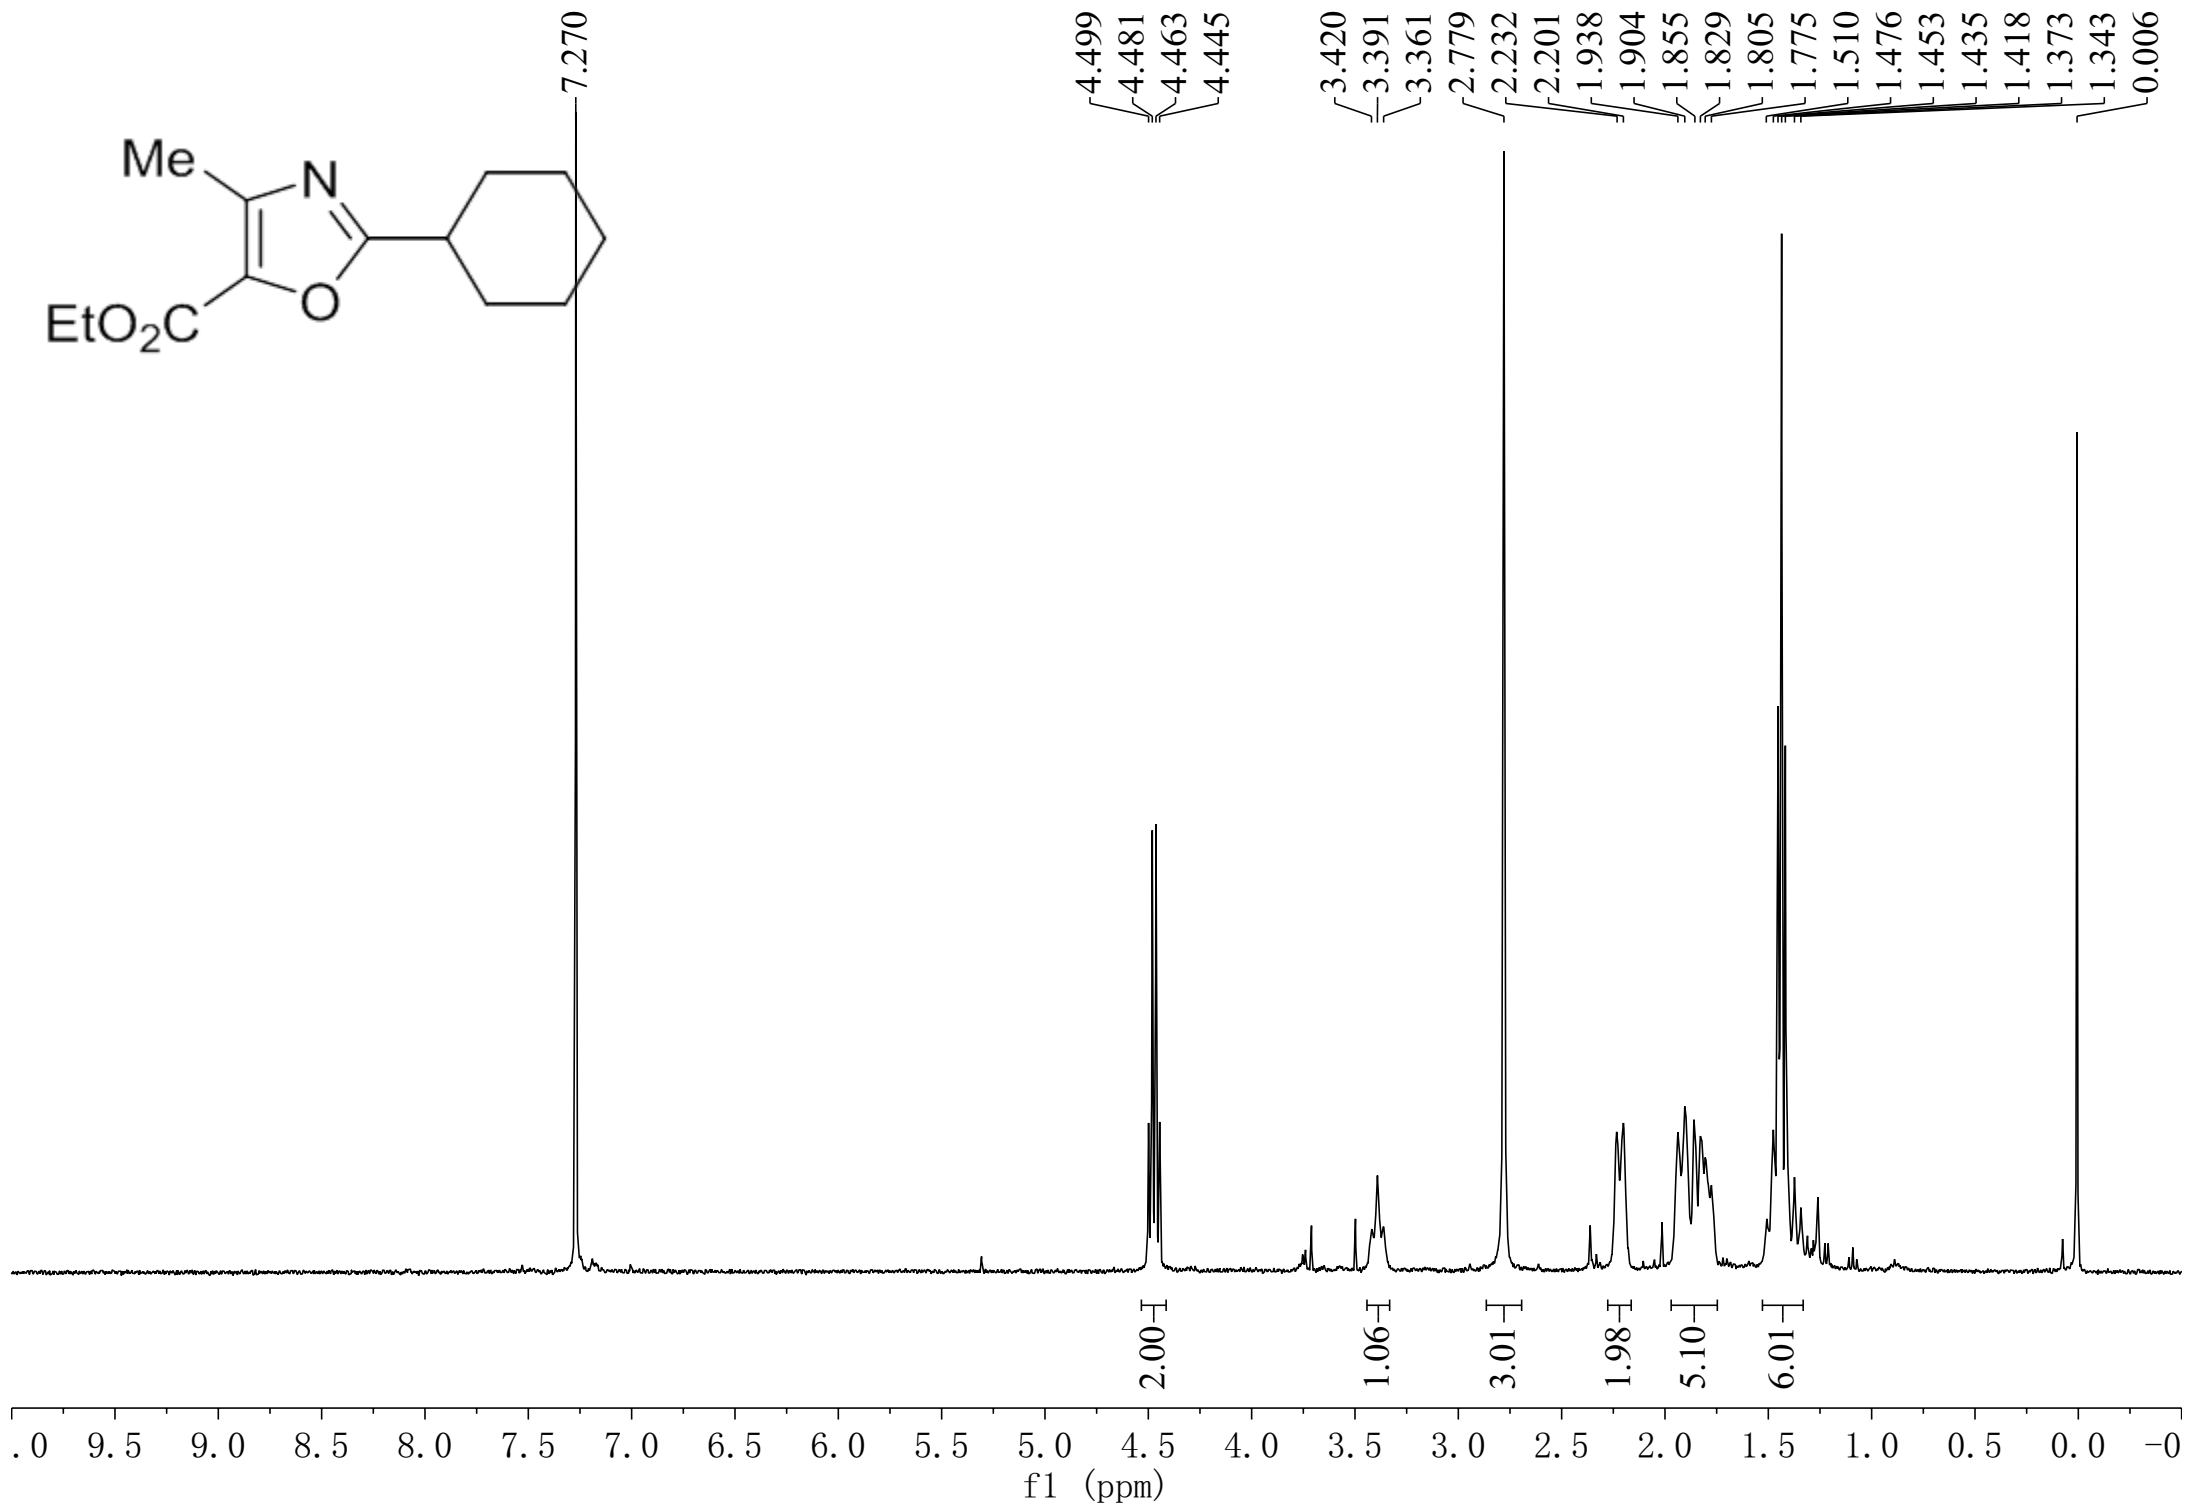

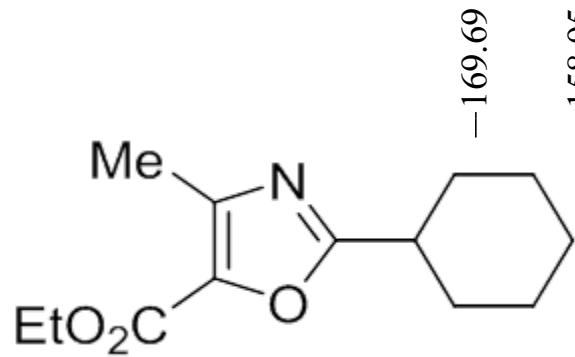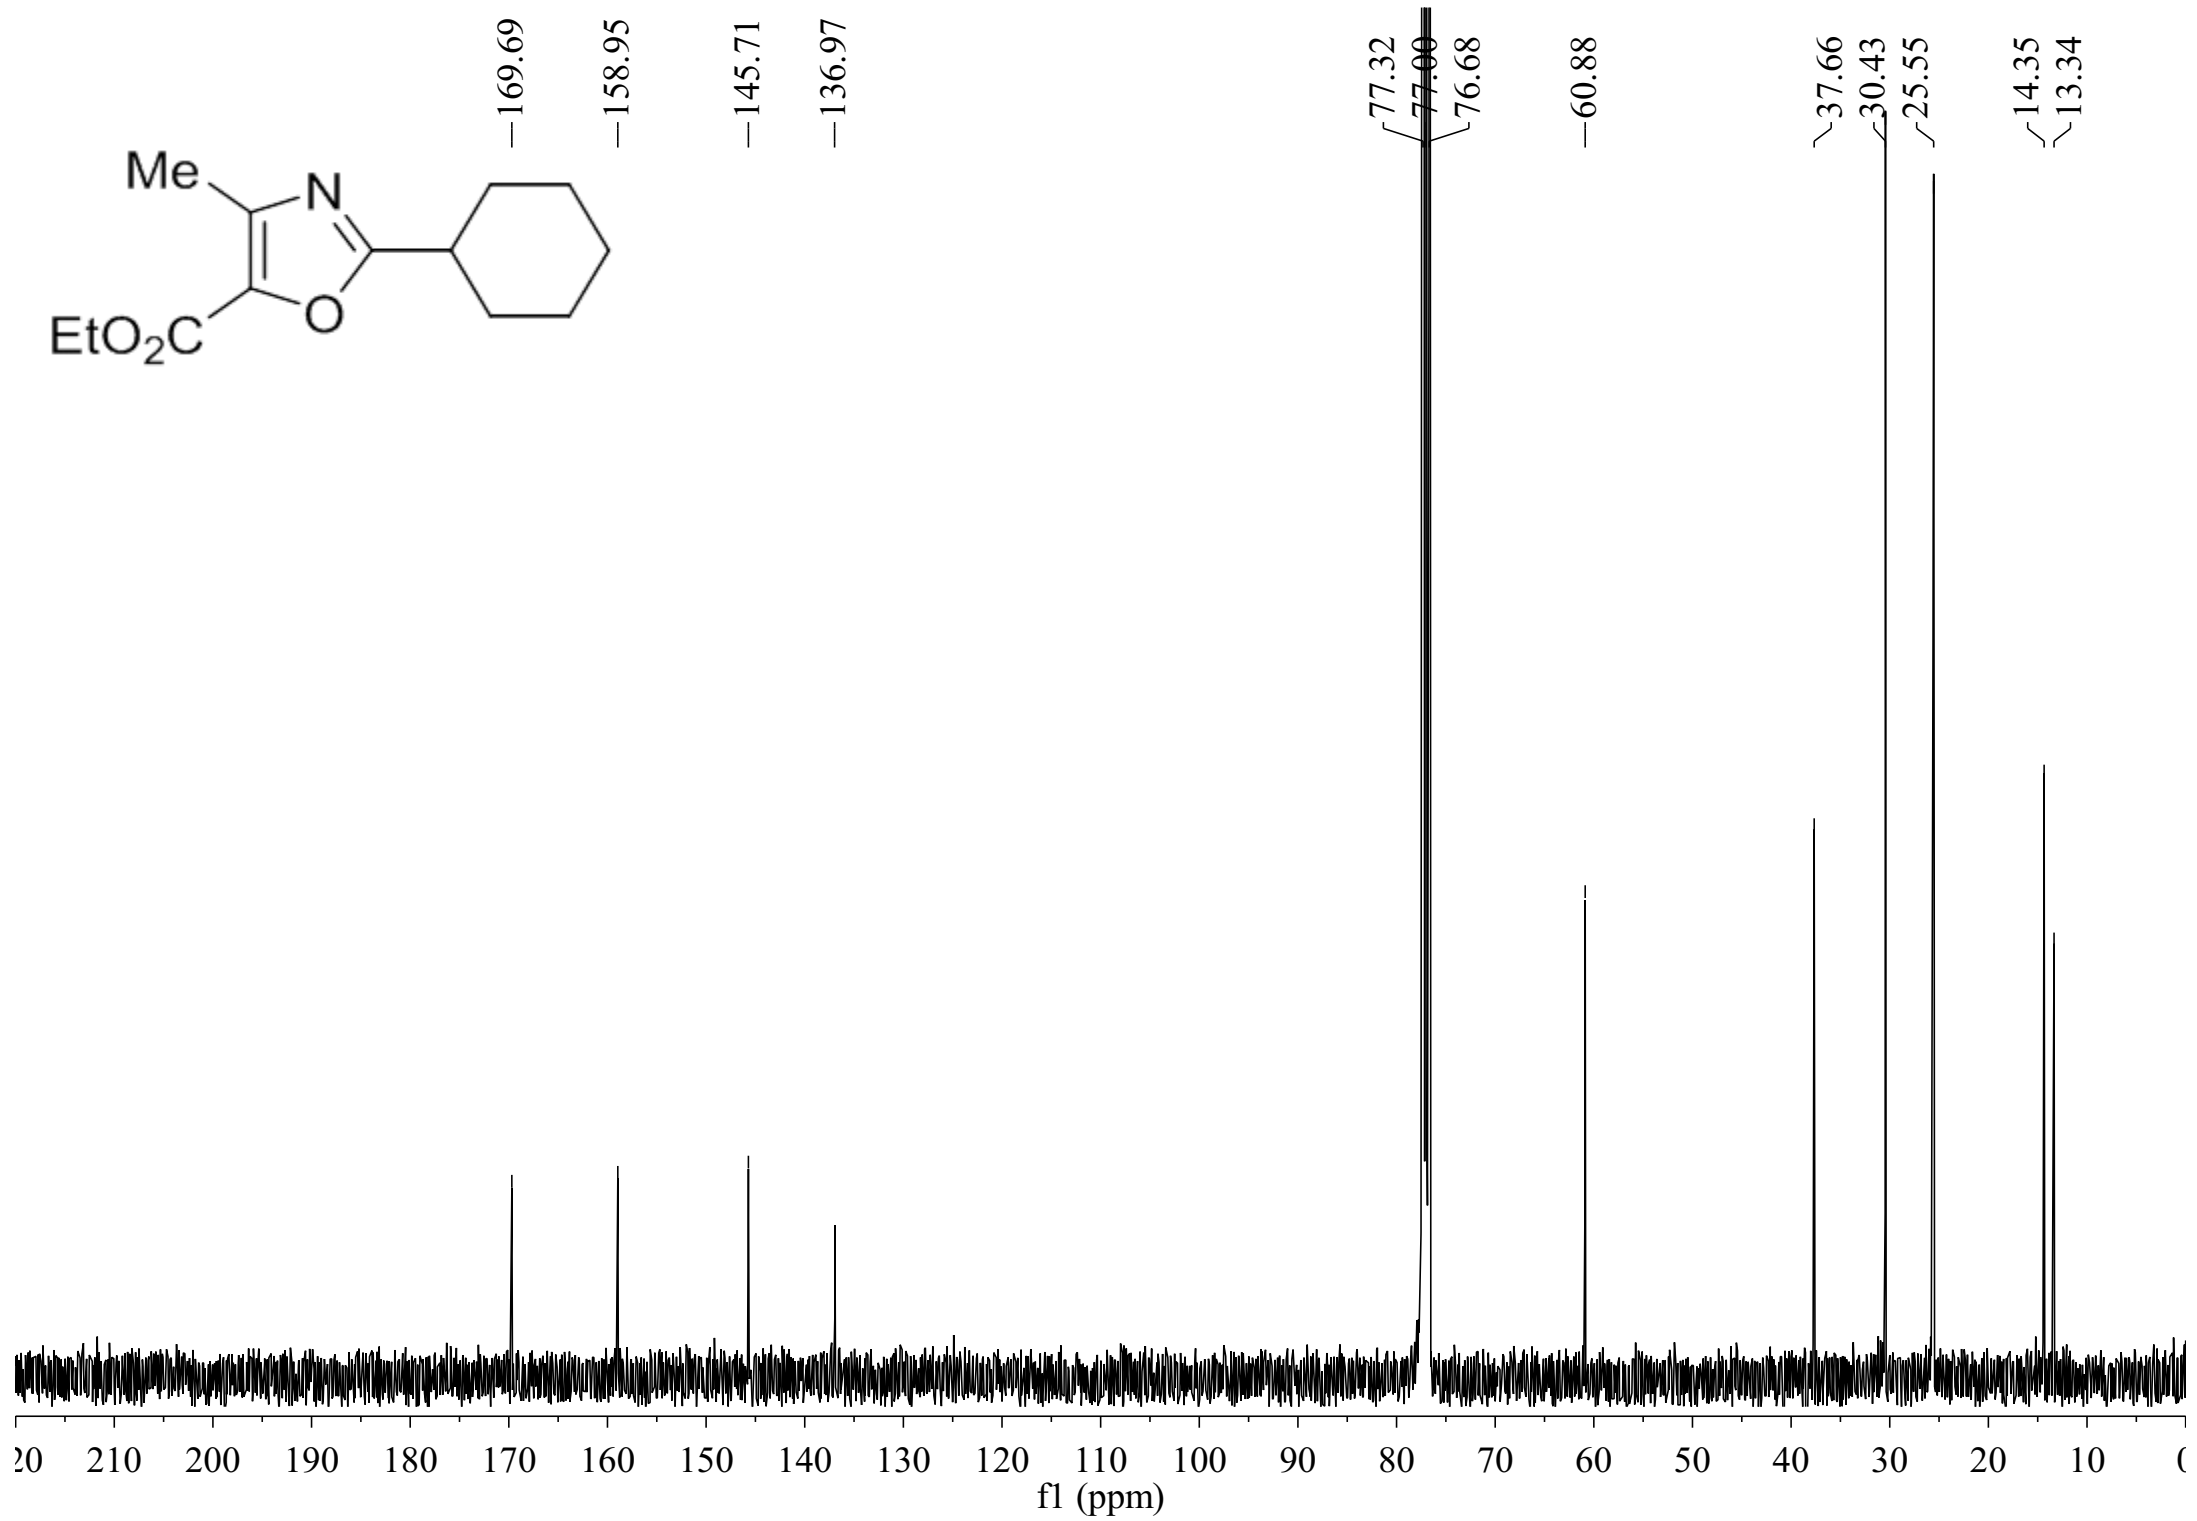

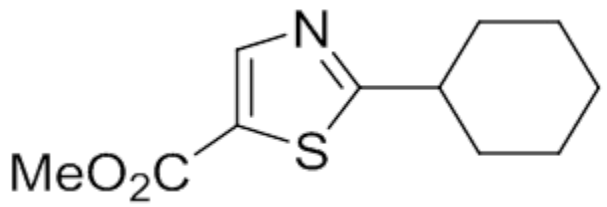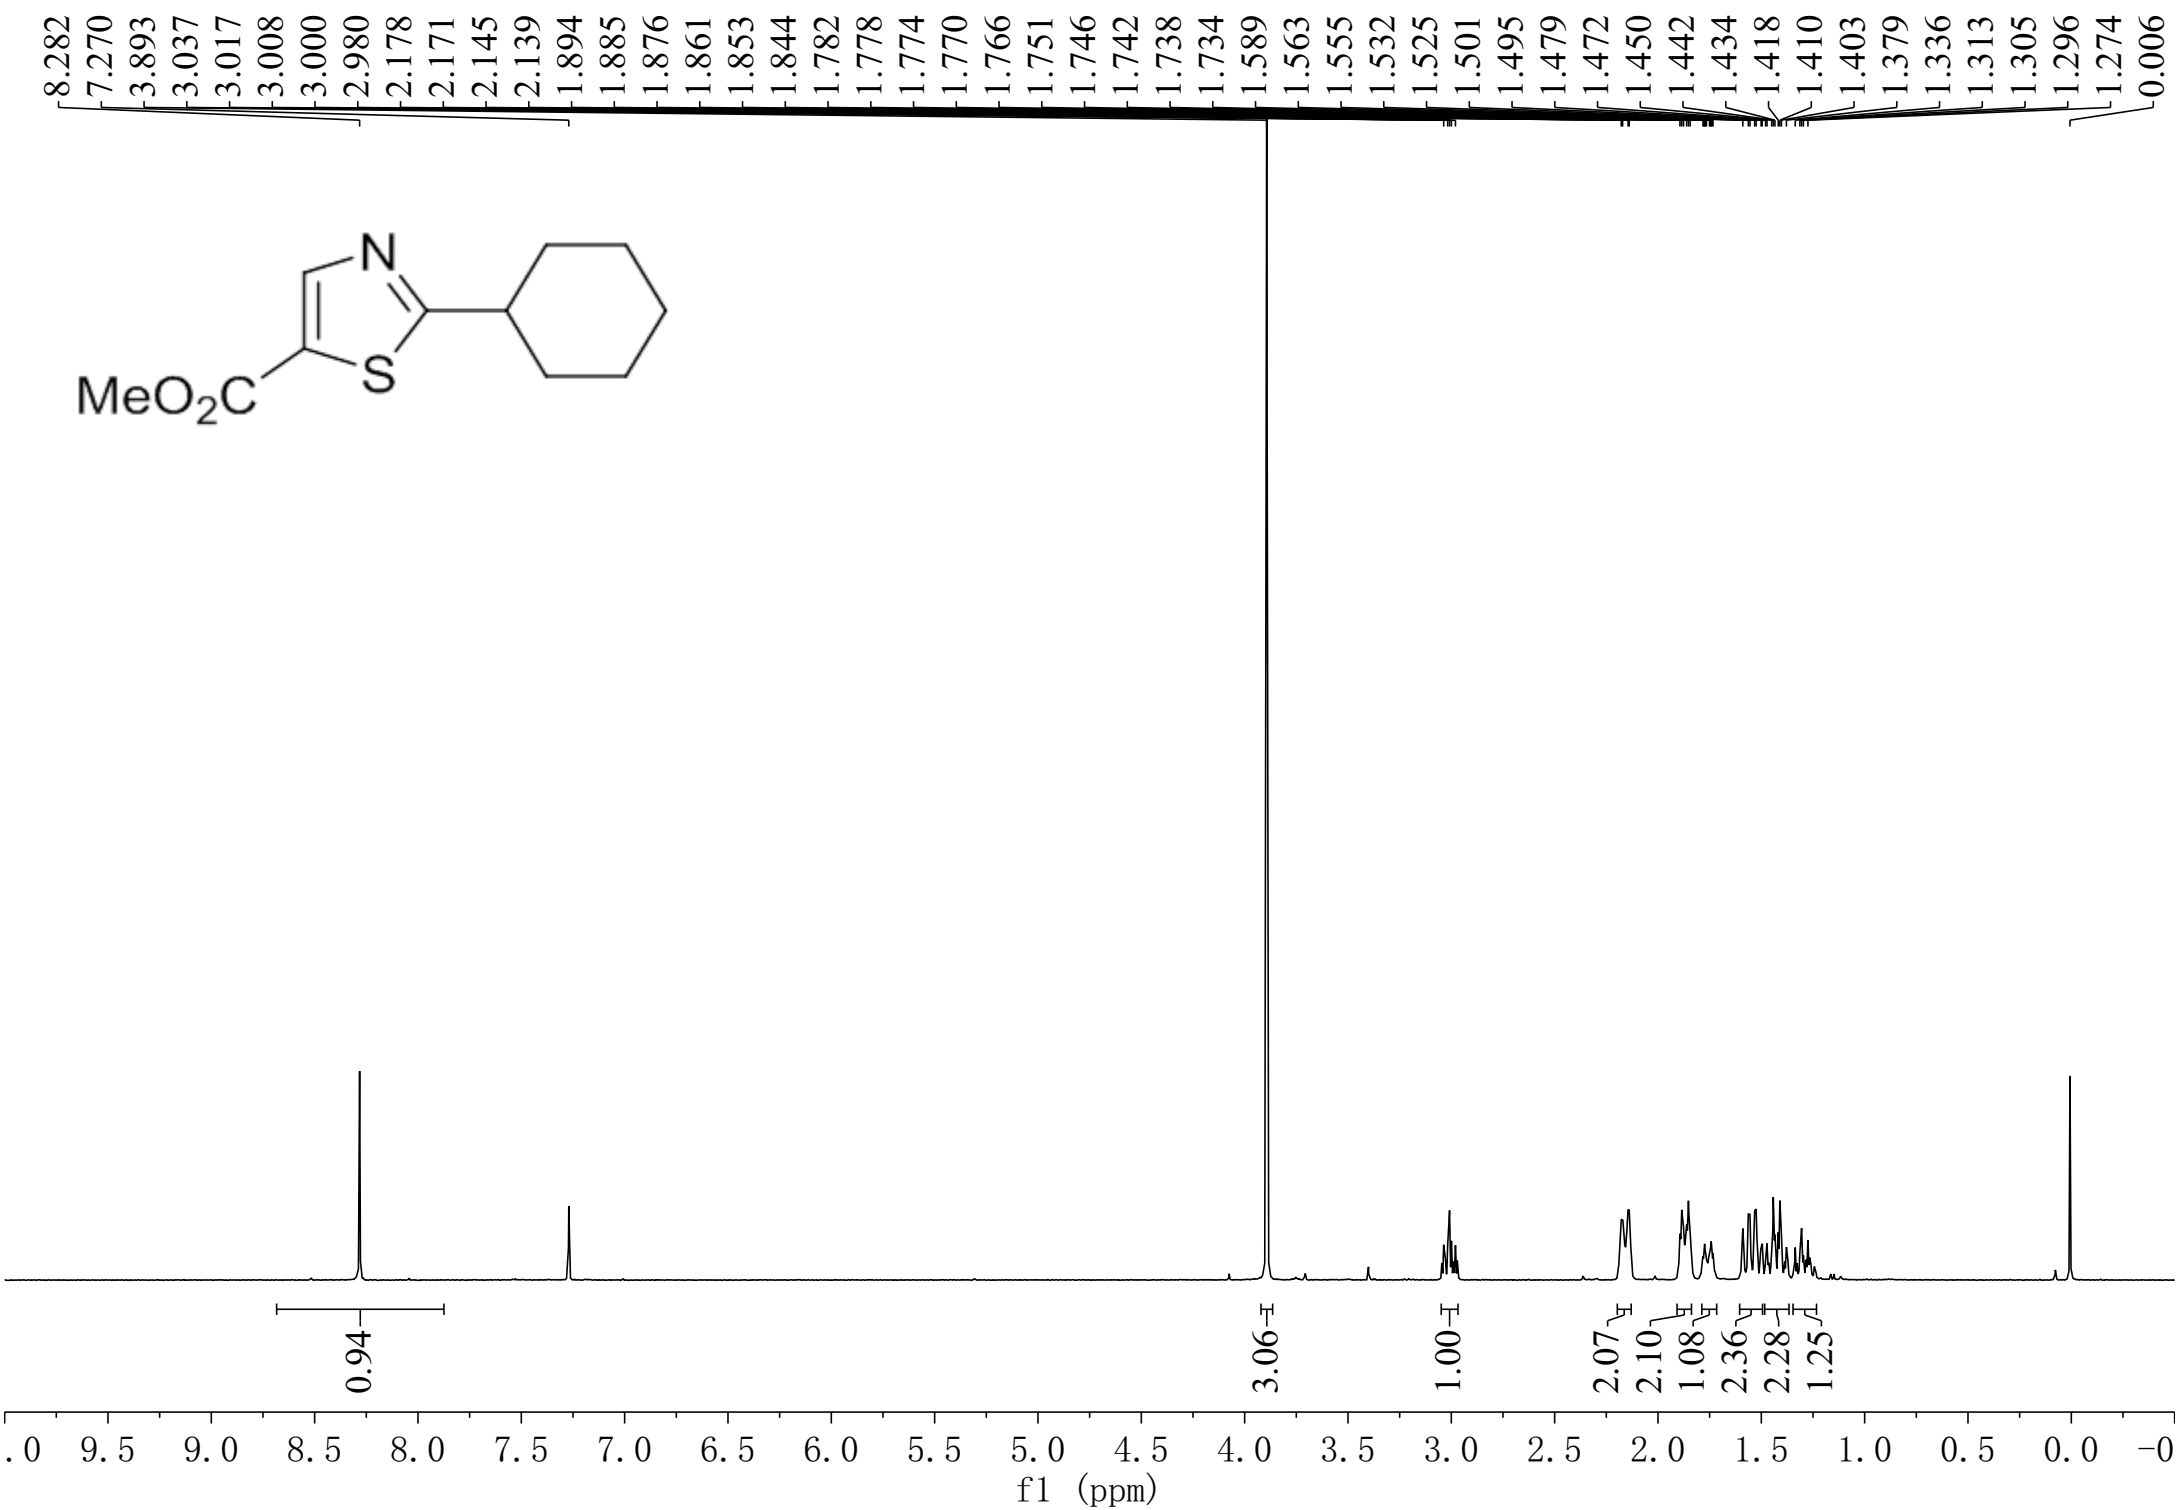

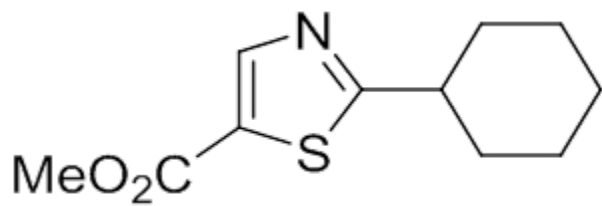

-183.25

-161.98

-148.09

-127.56

77.32

77.00

76.68

-52.28

-42.99

-33.46

25.91

25.66

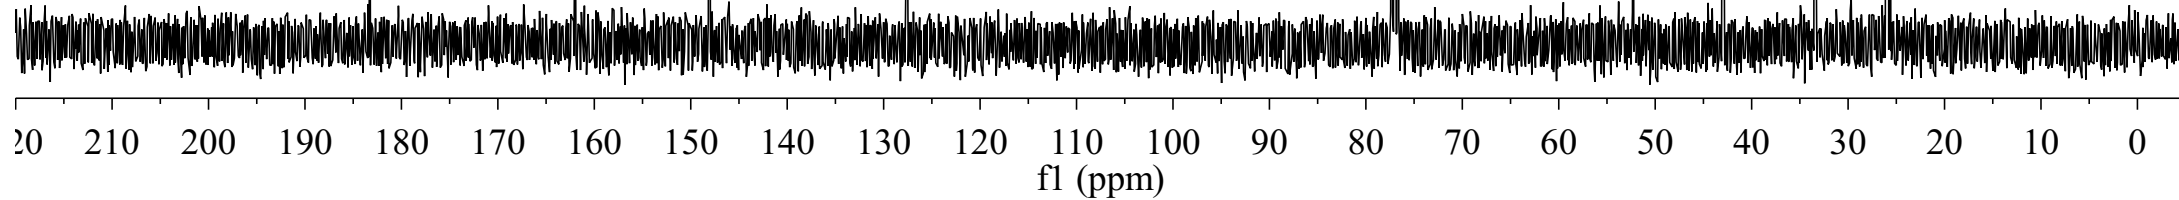



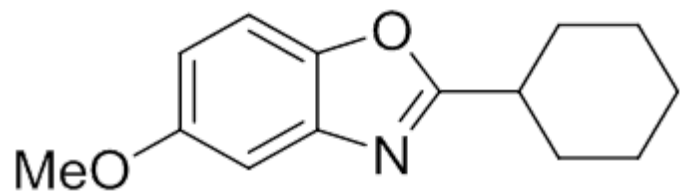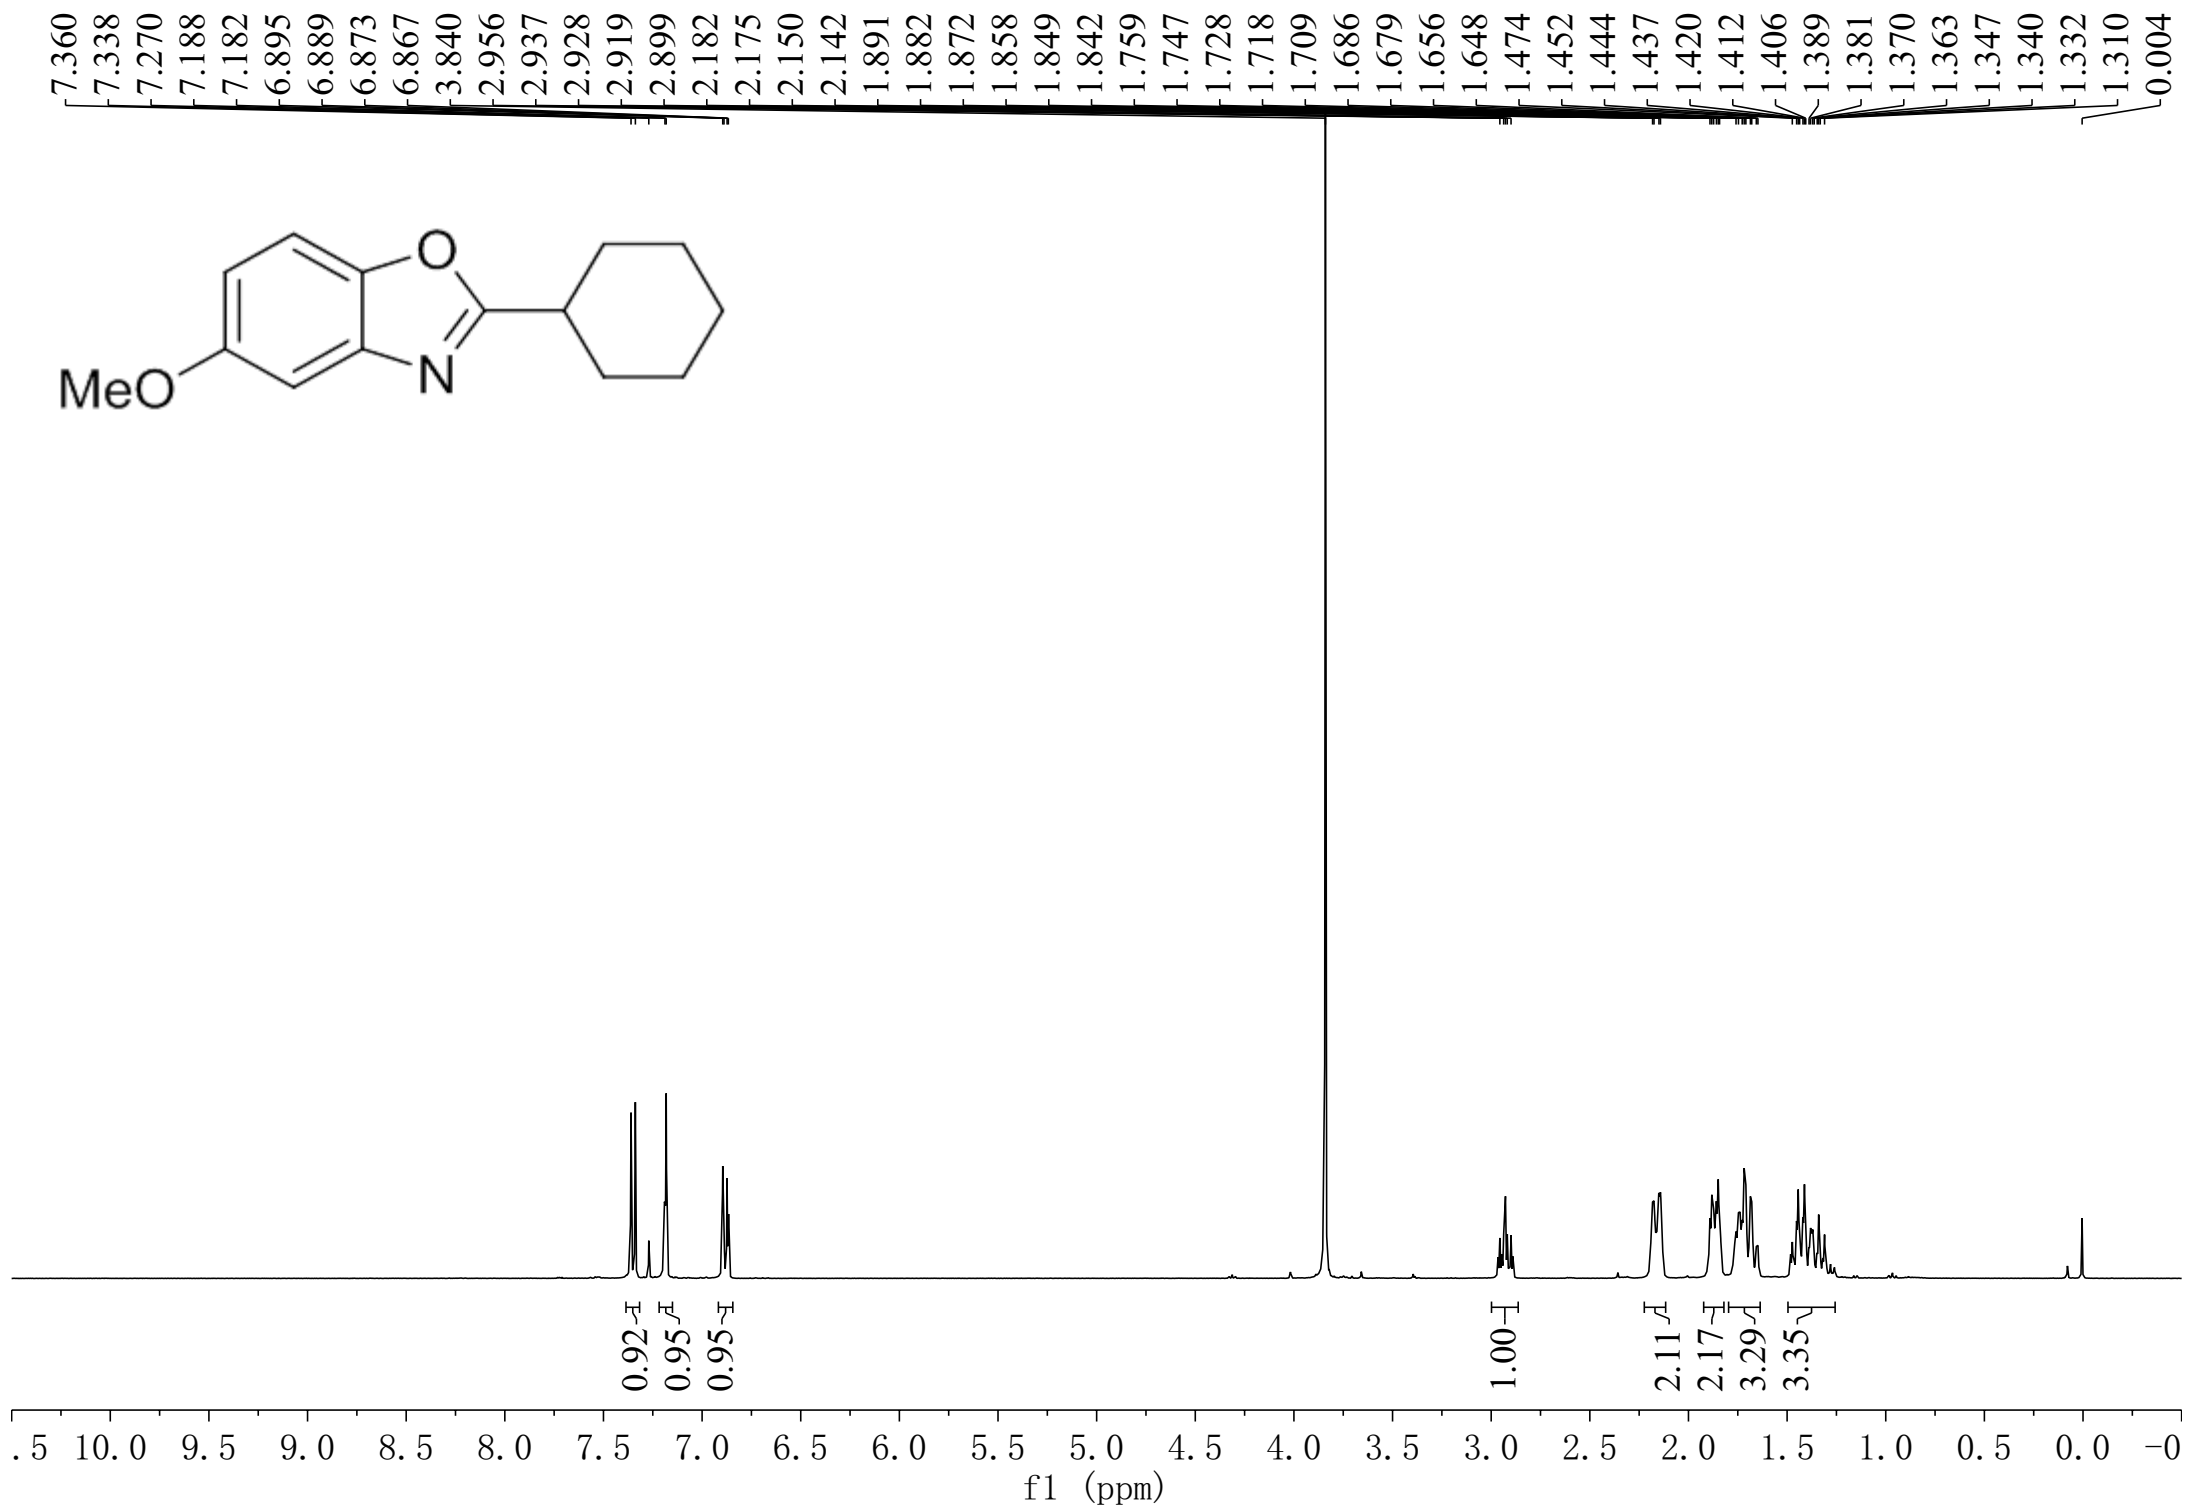

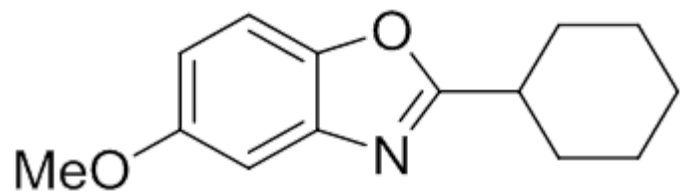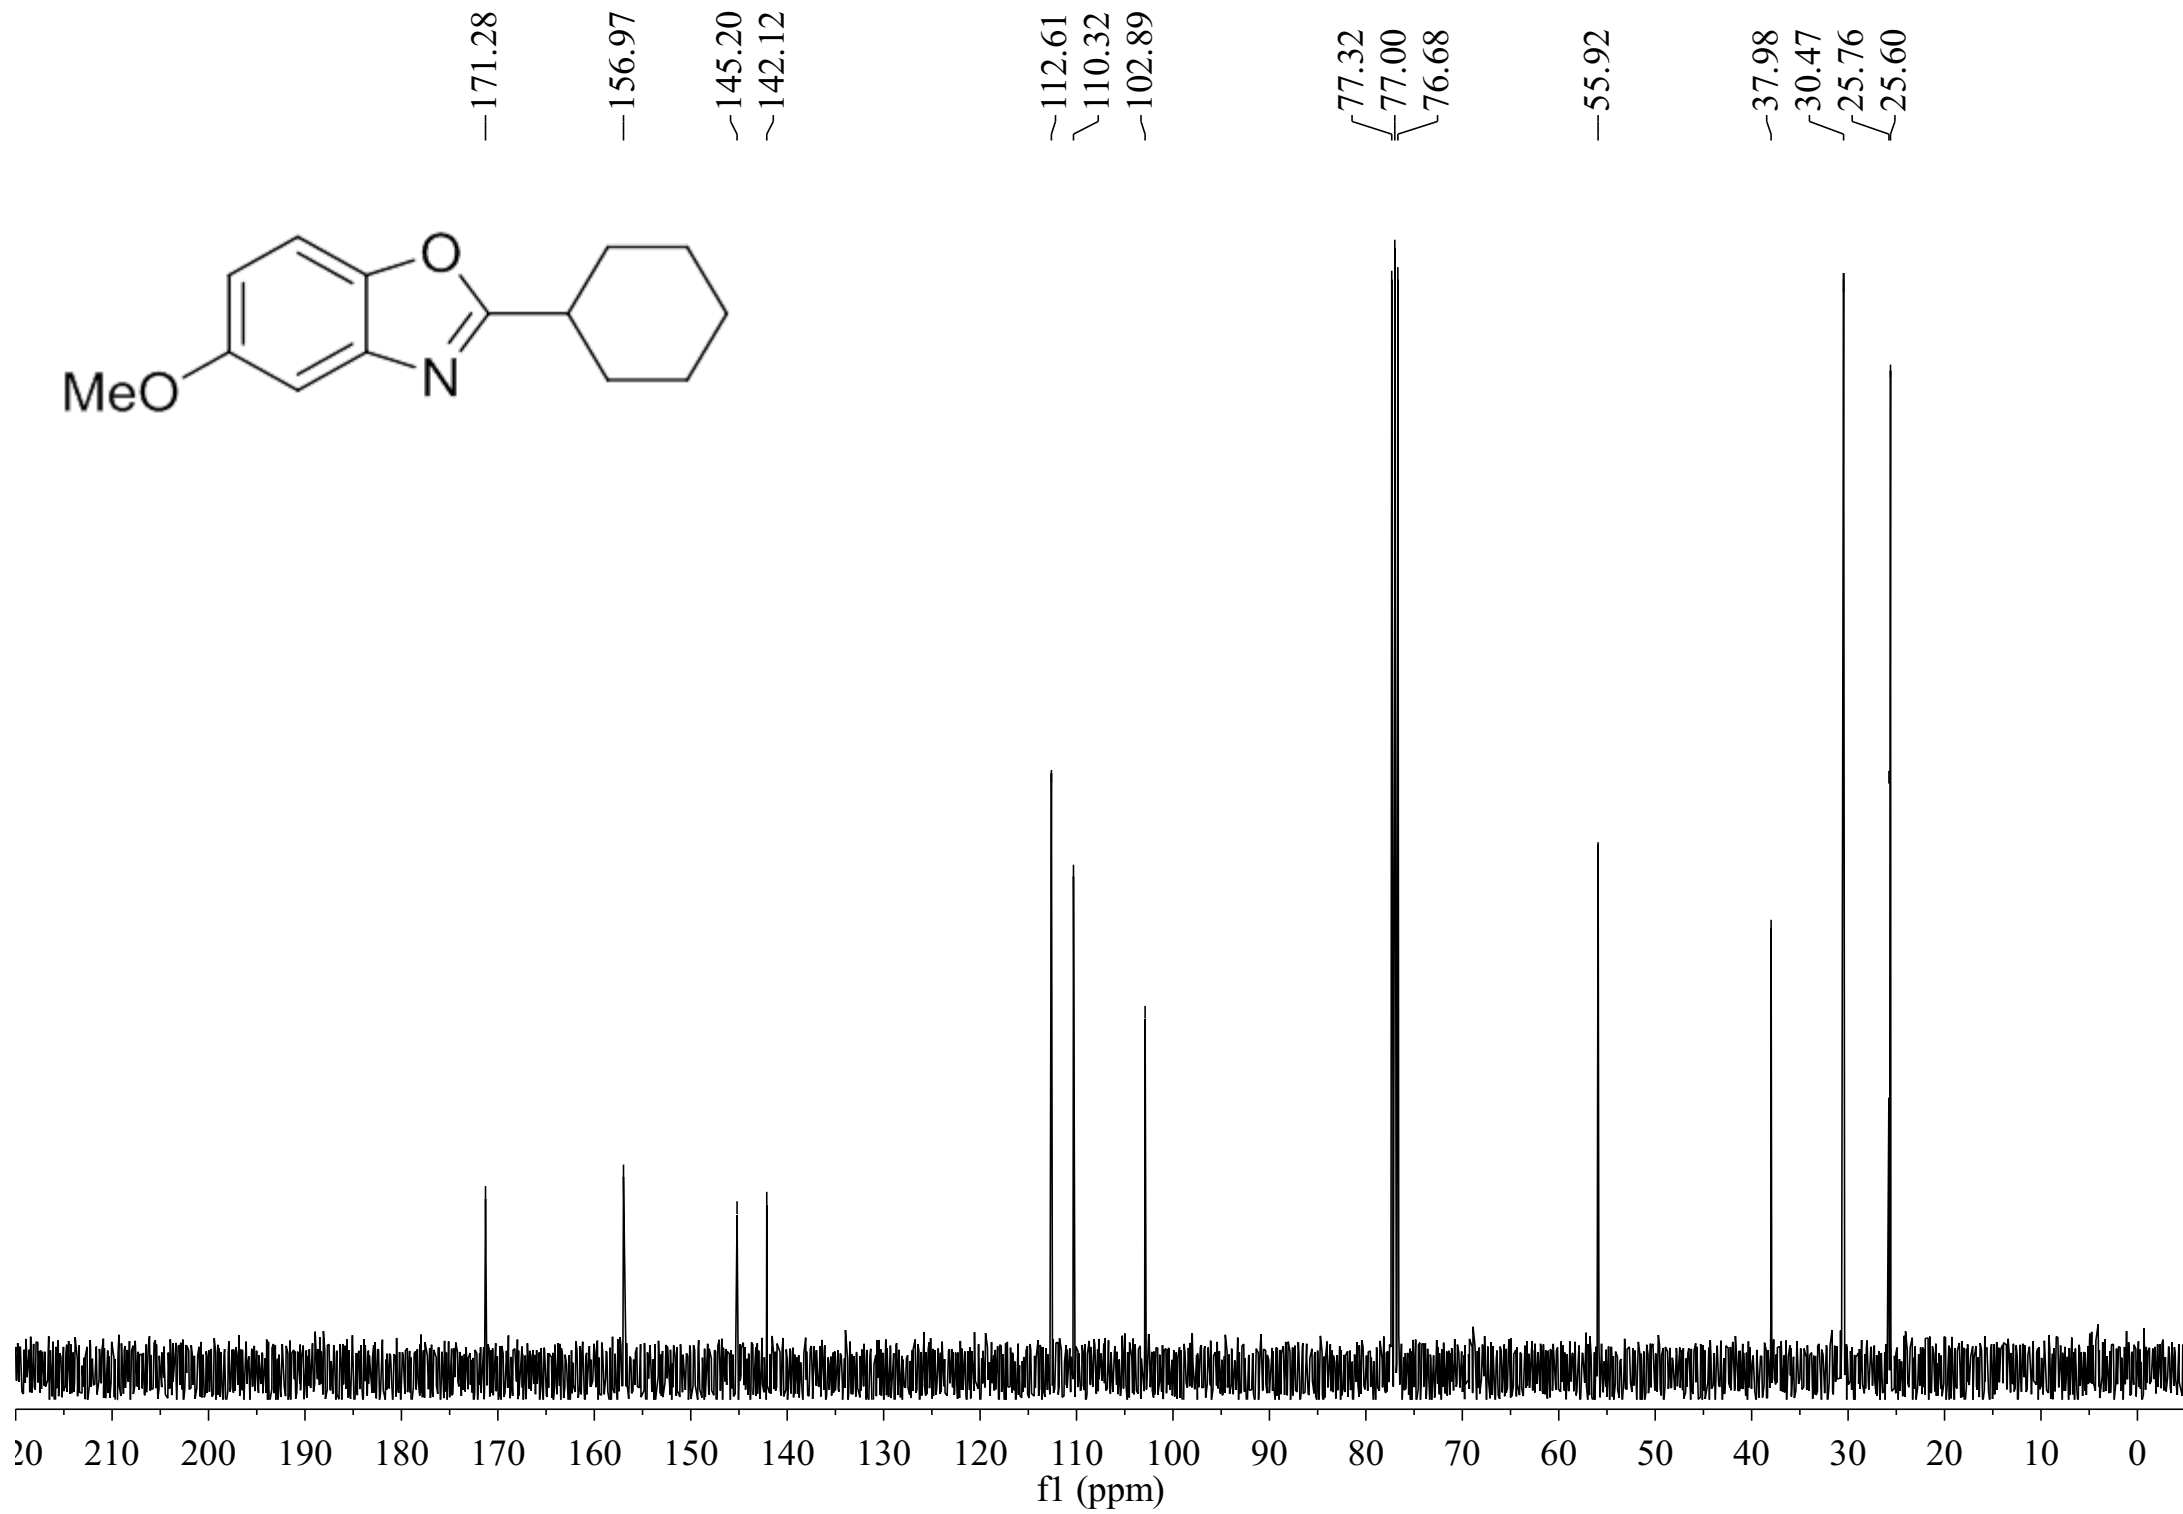

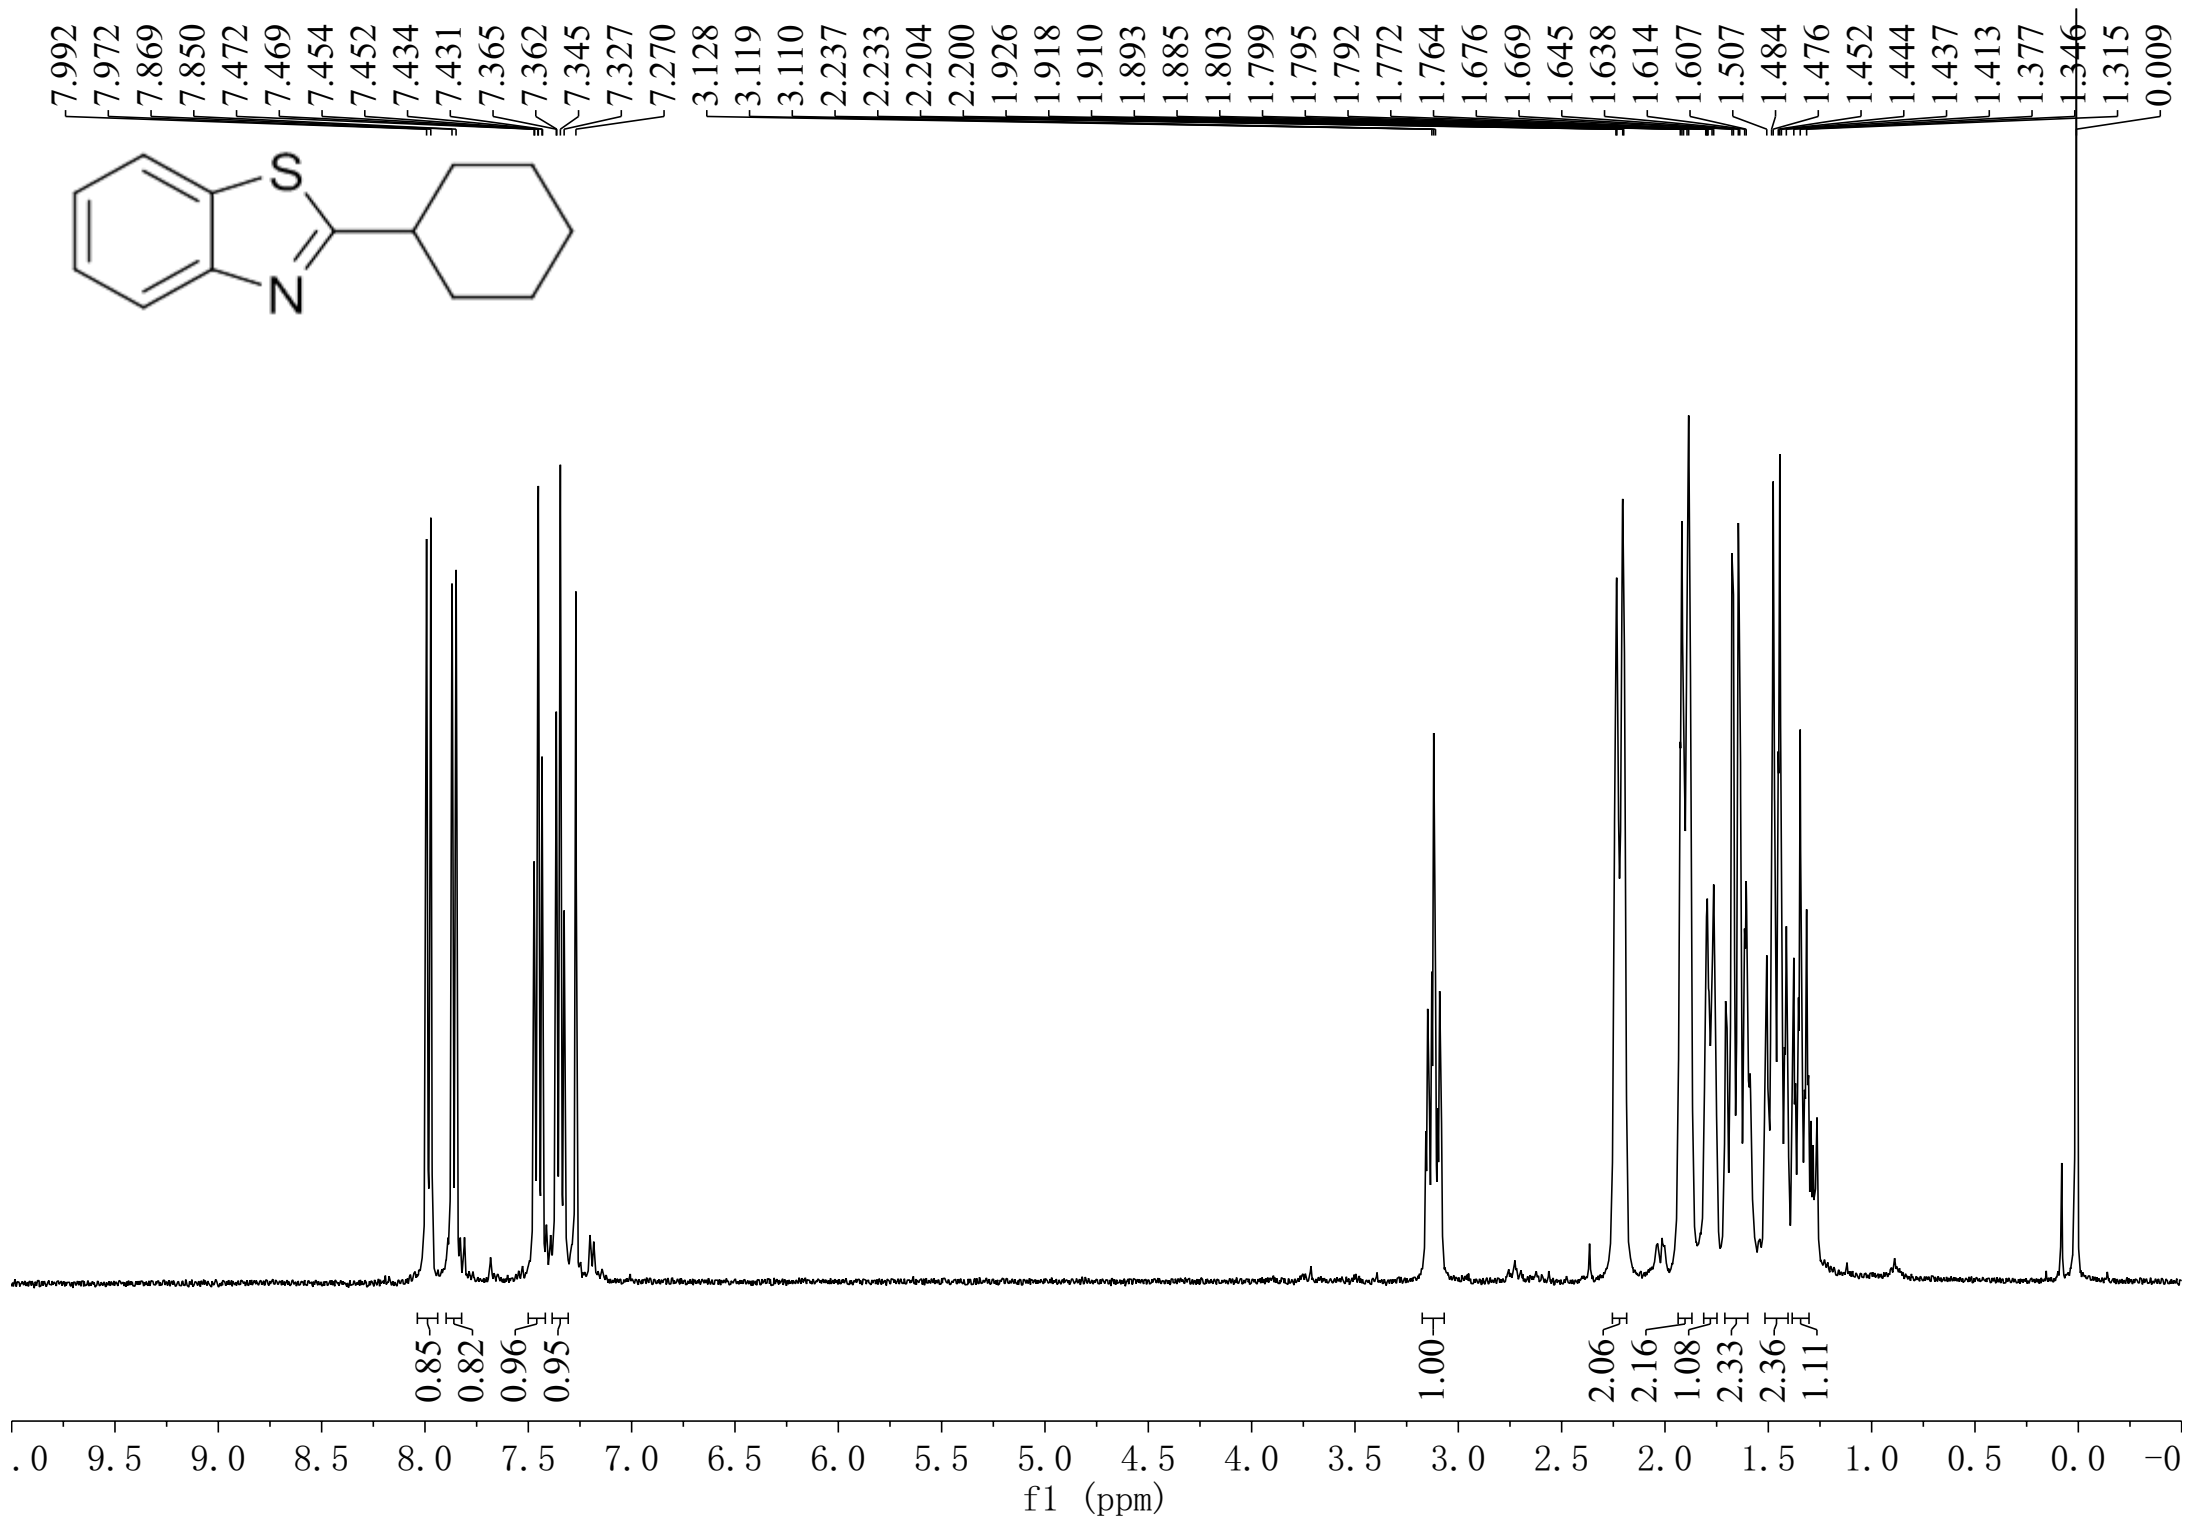

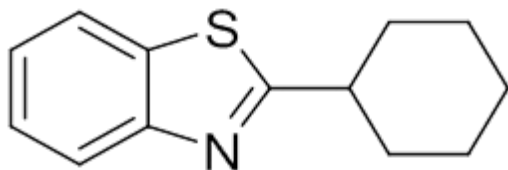

-177.58

-153.12

134.55

125.77

124.47

122.55

121.53

77.32

77.00

76.68

-43.44

-33.42

26.06

25.78

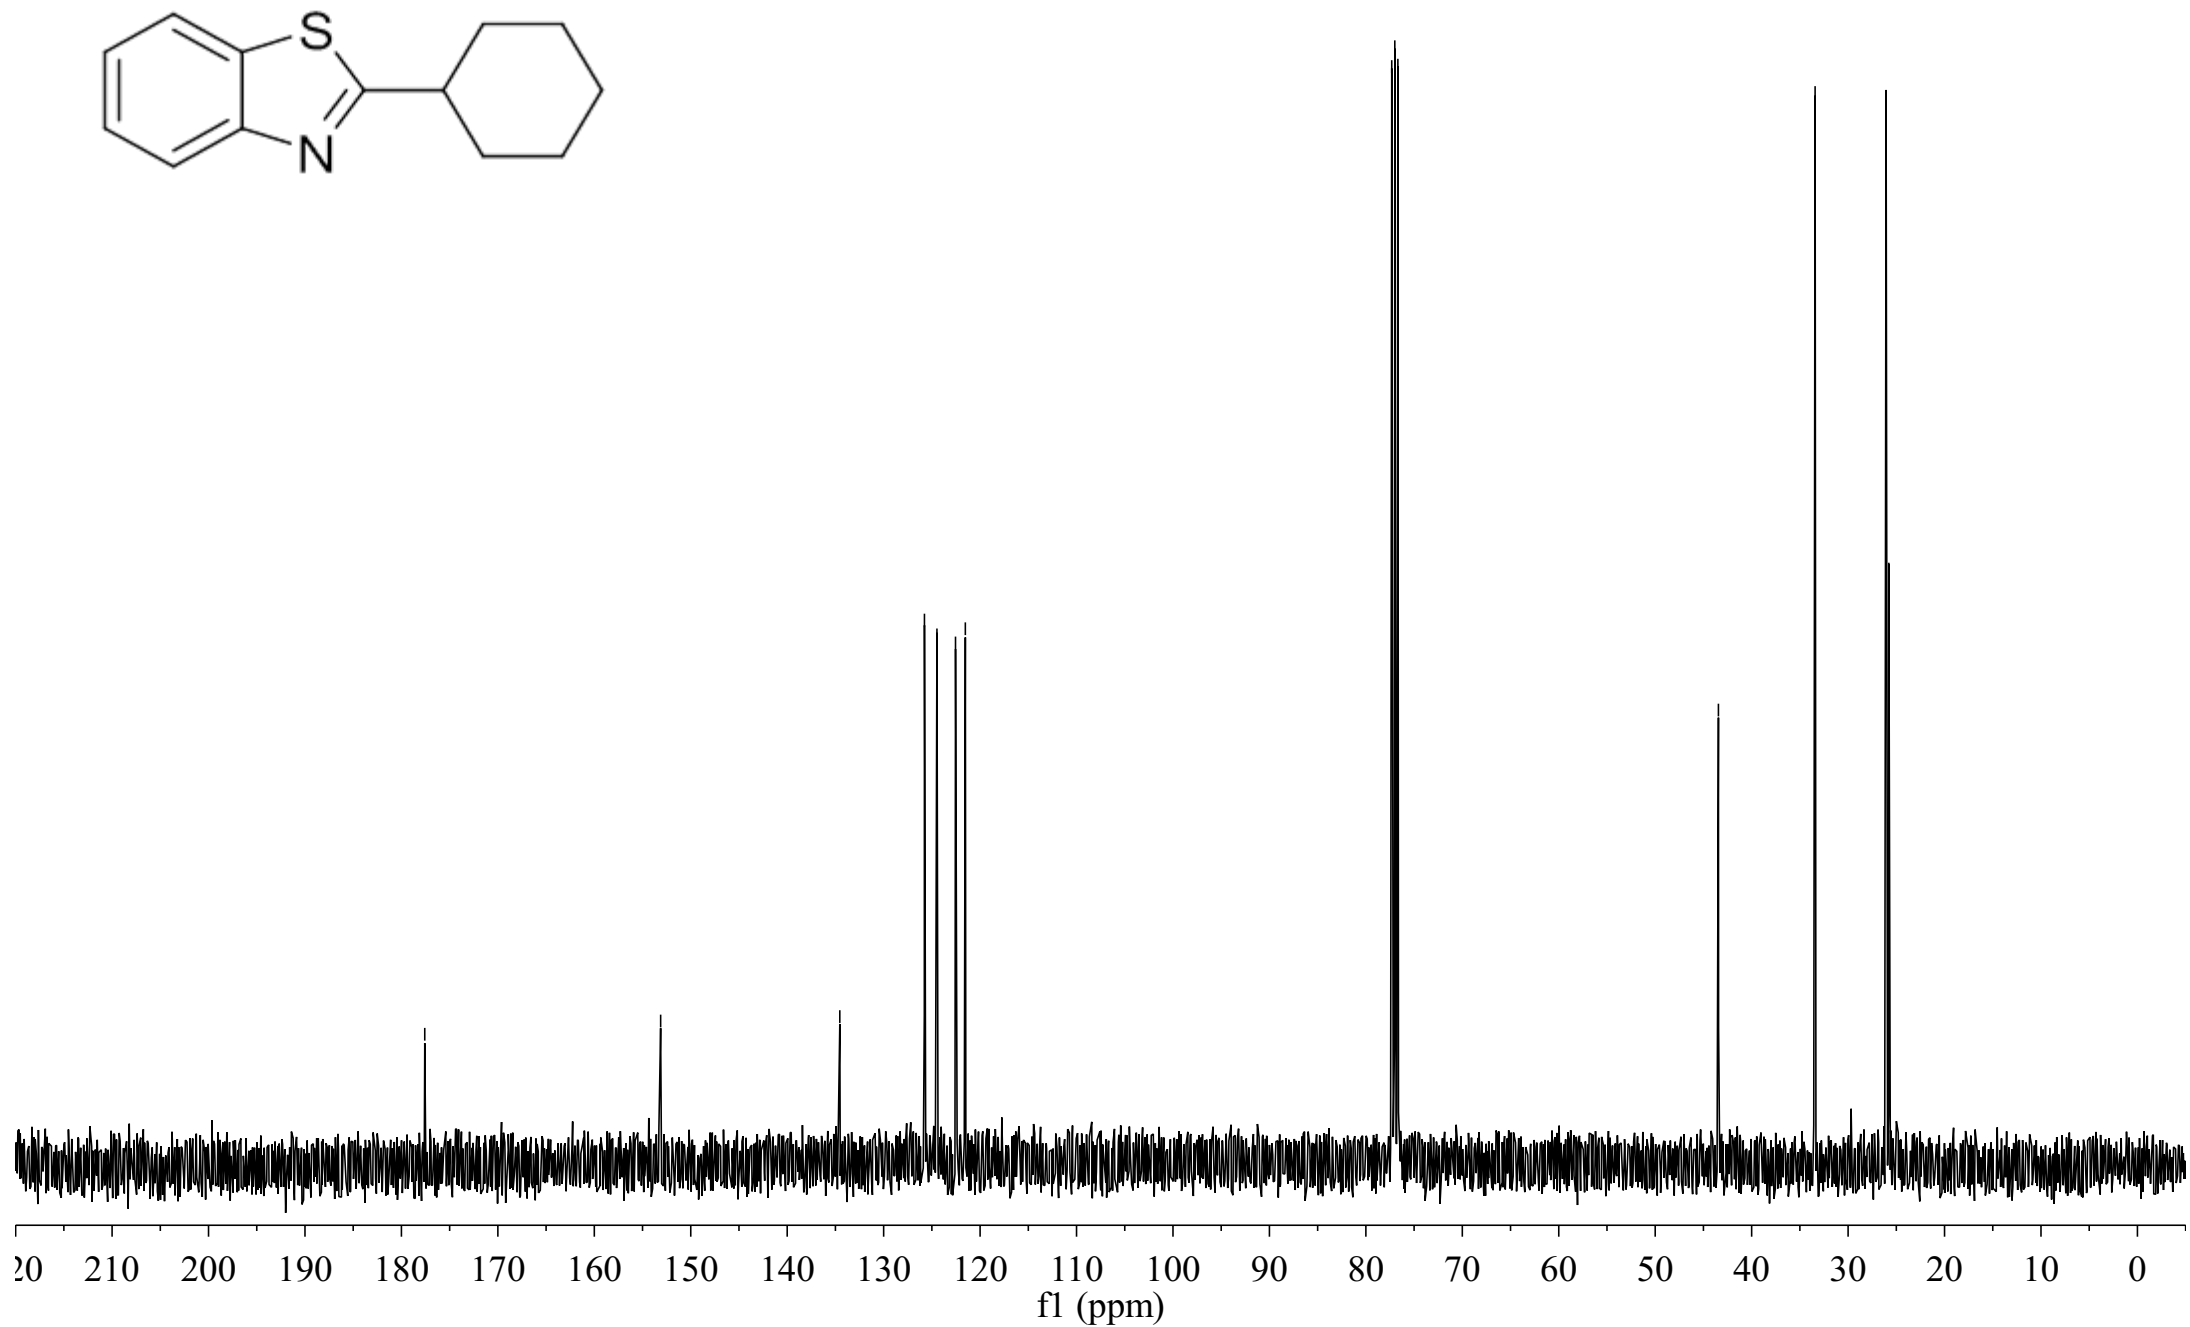

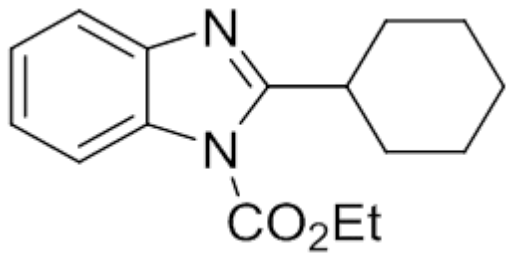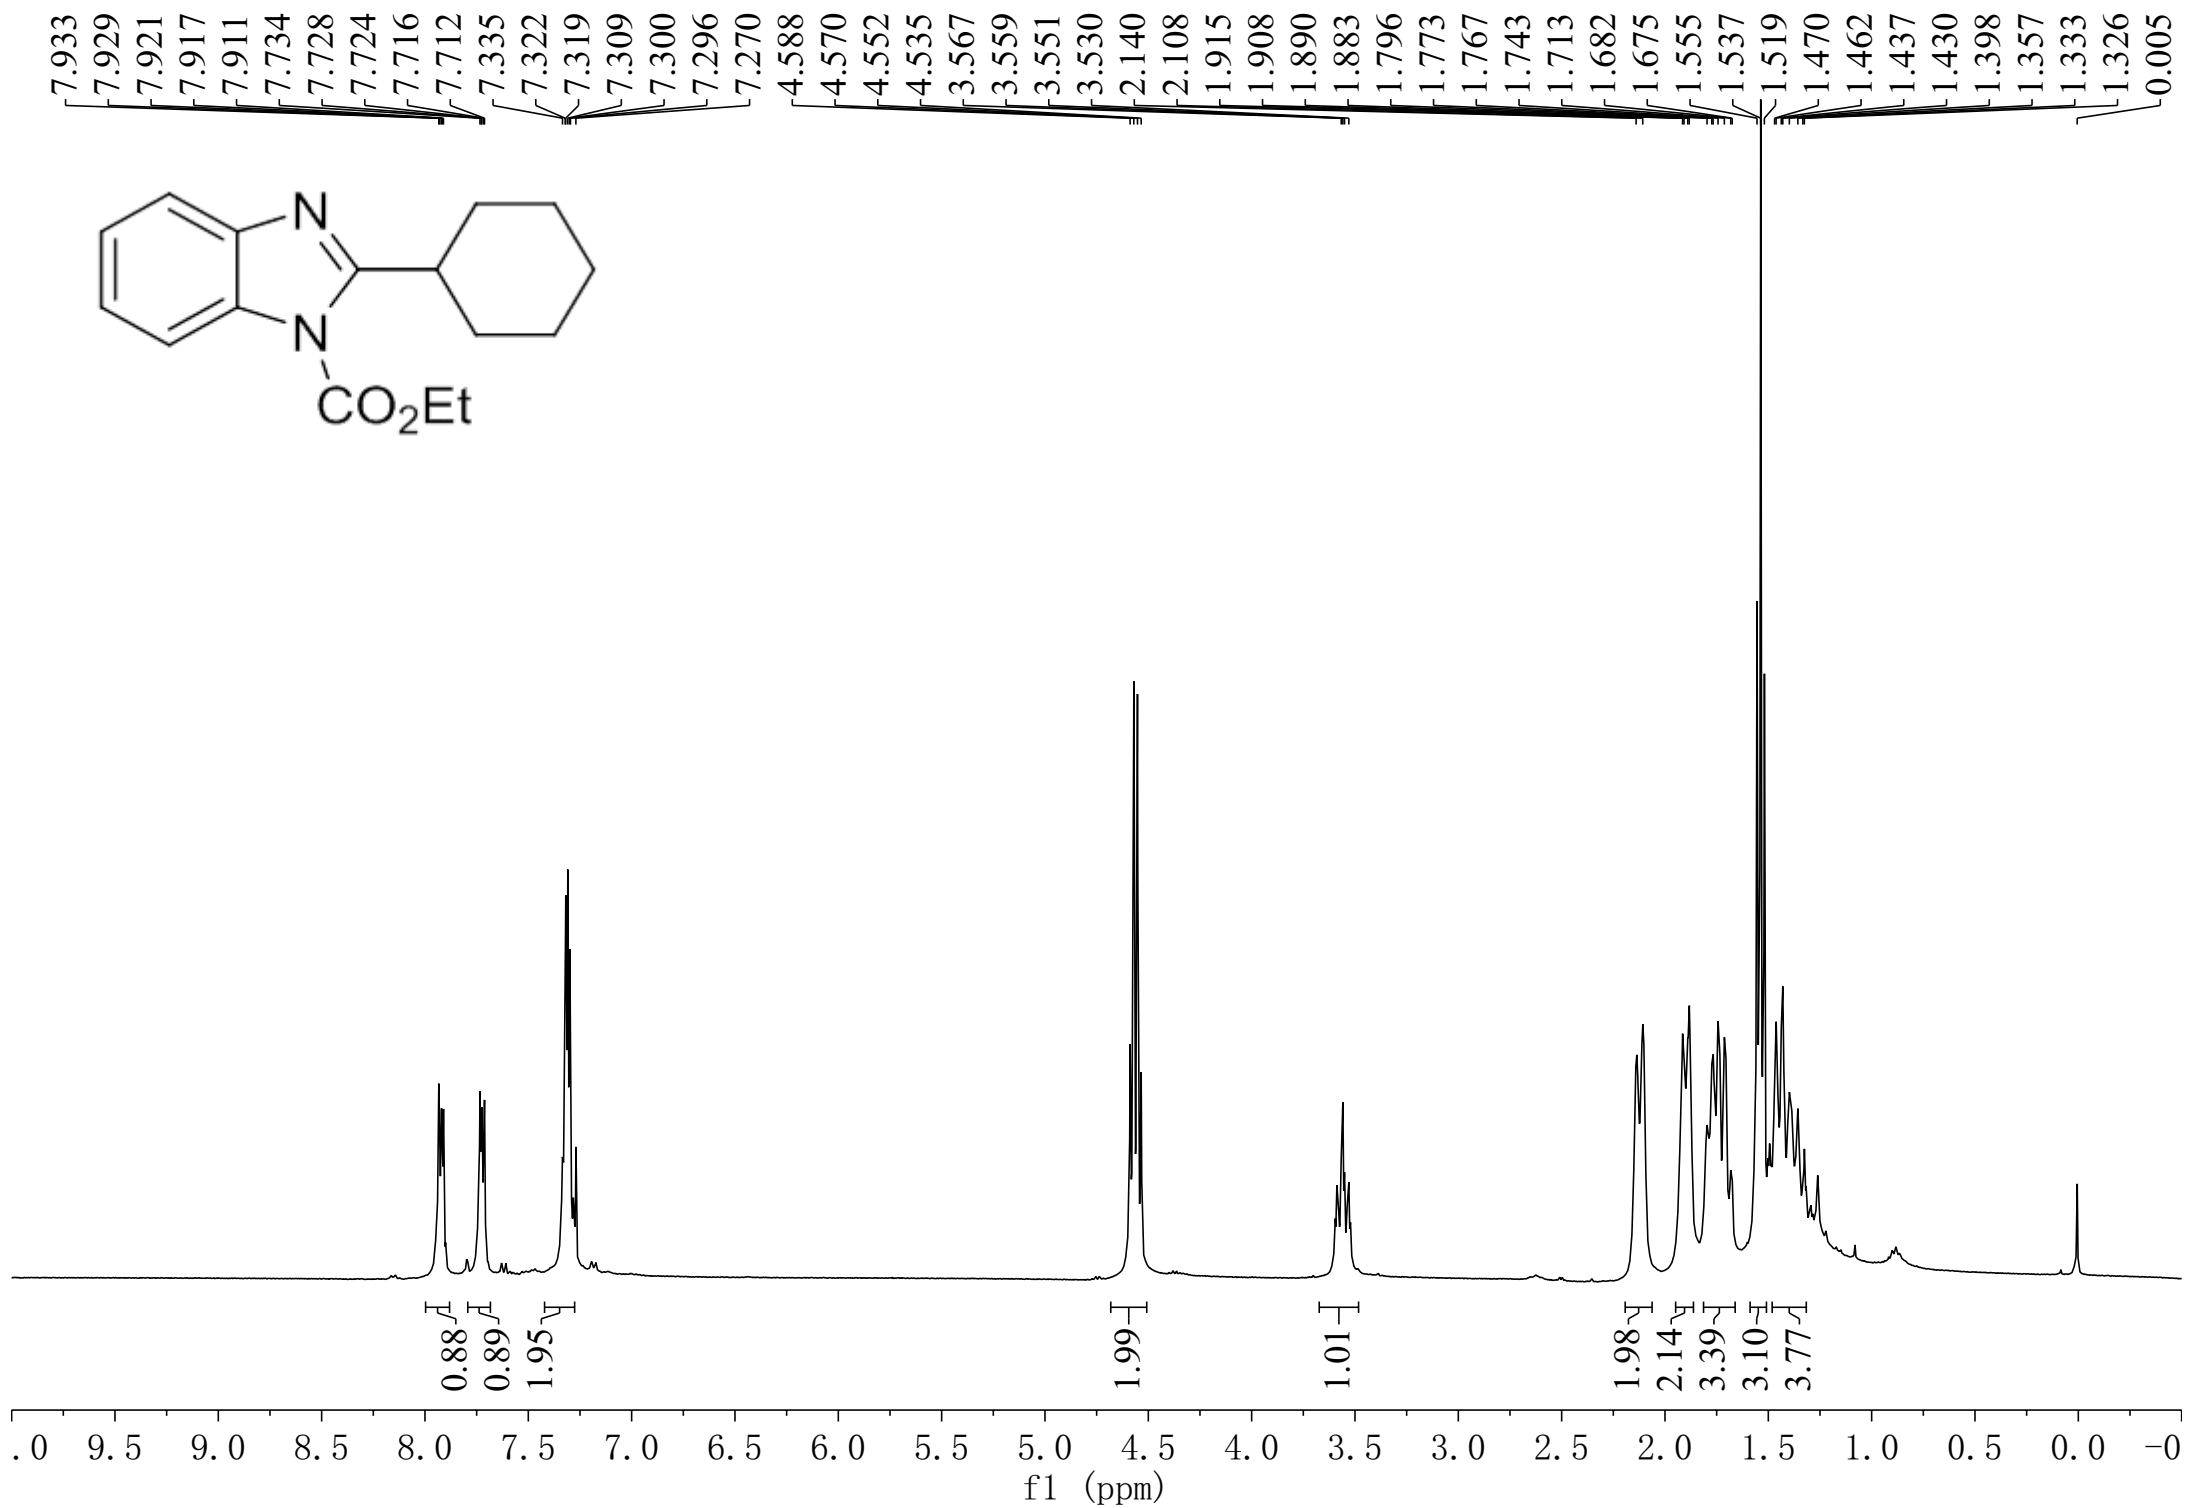

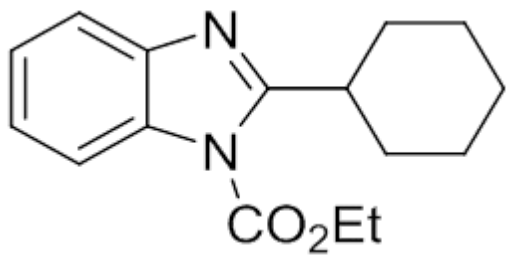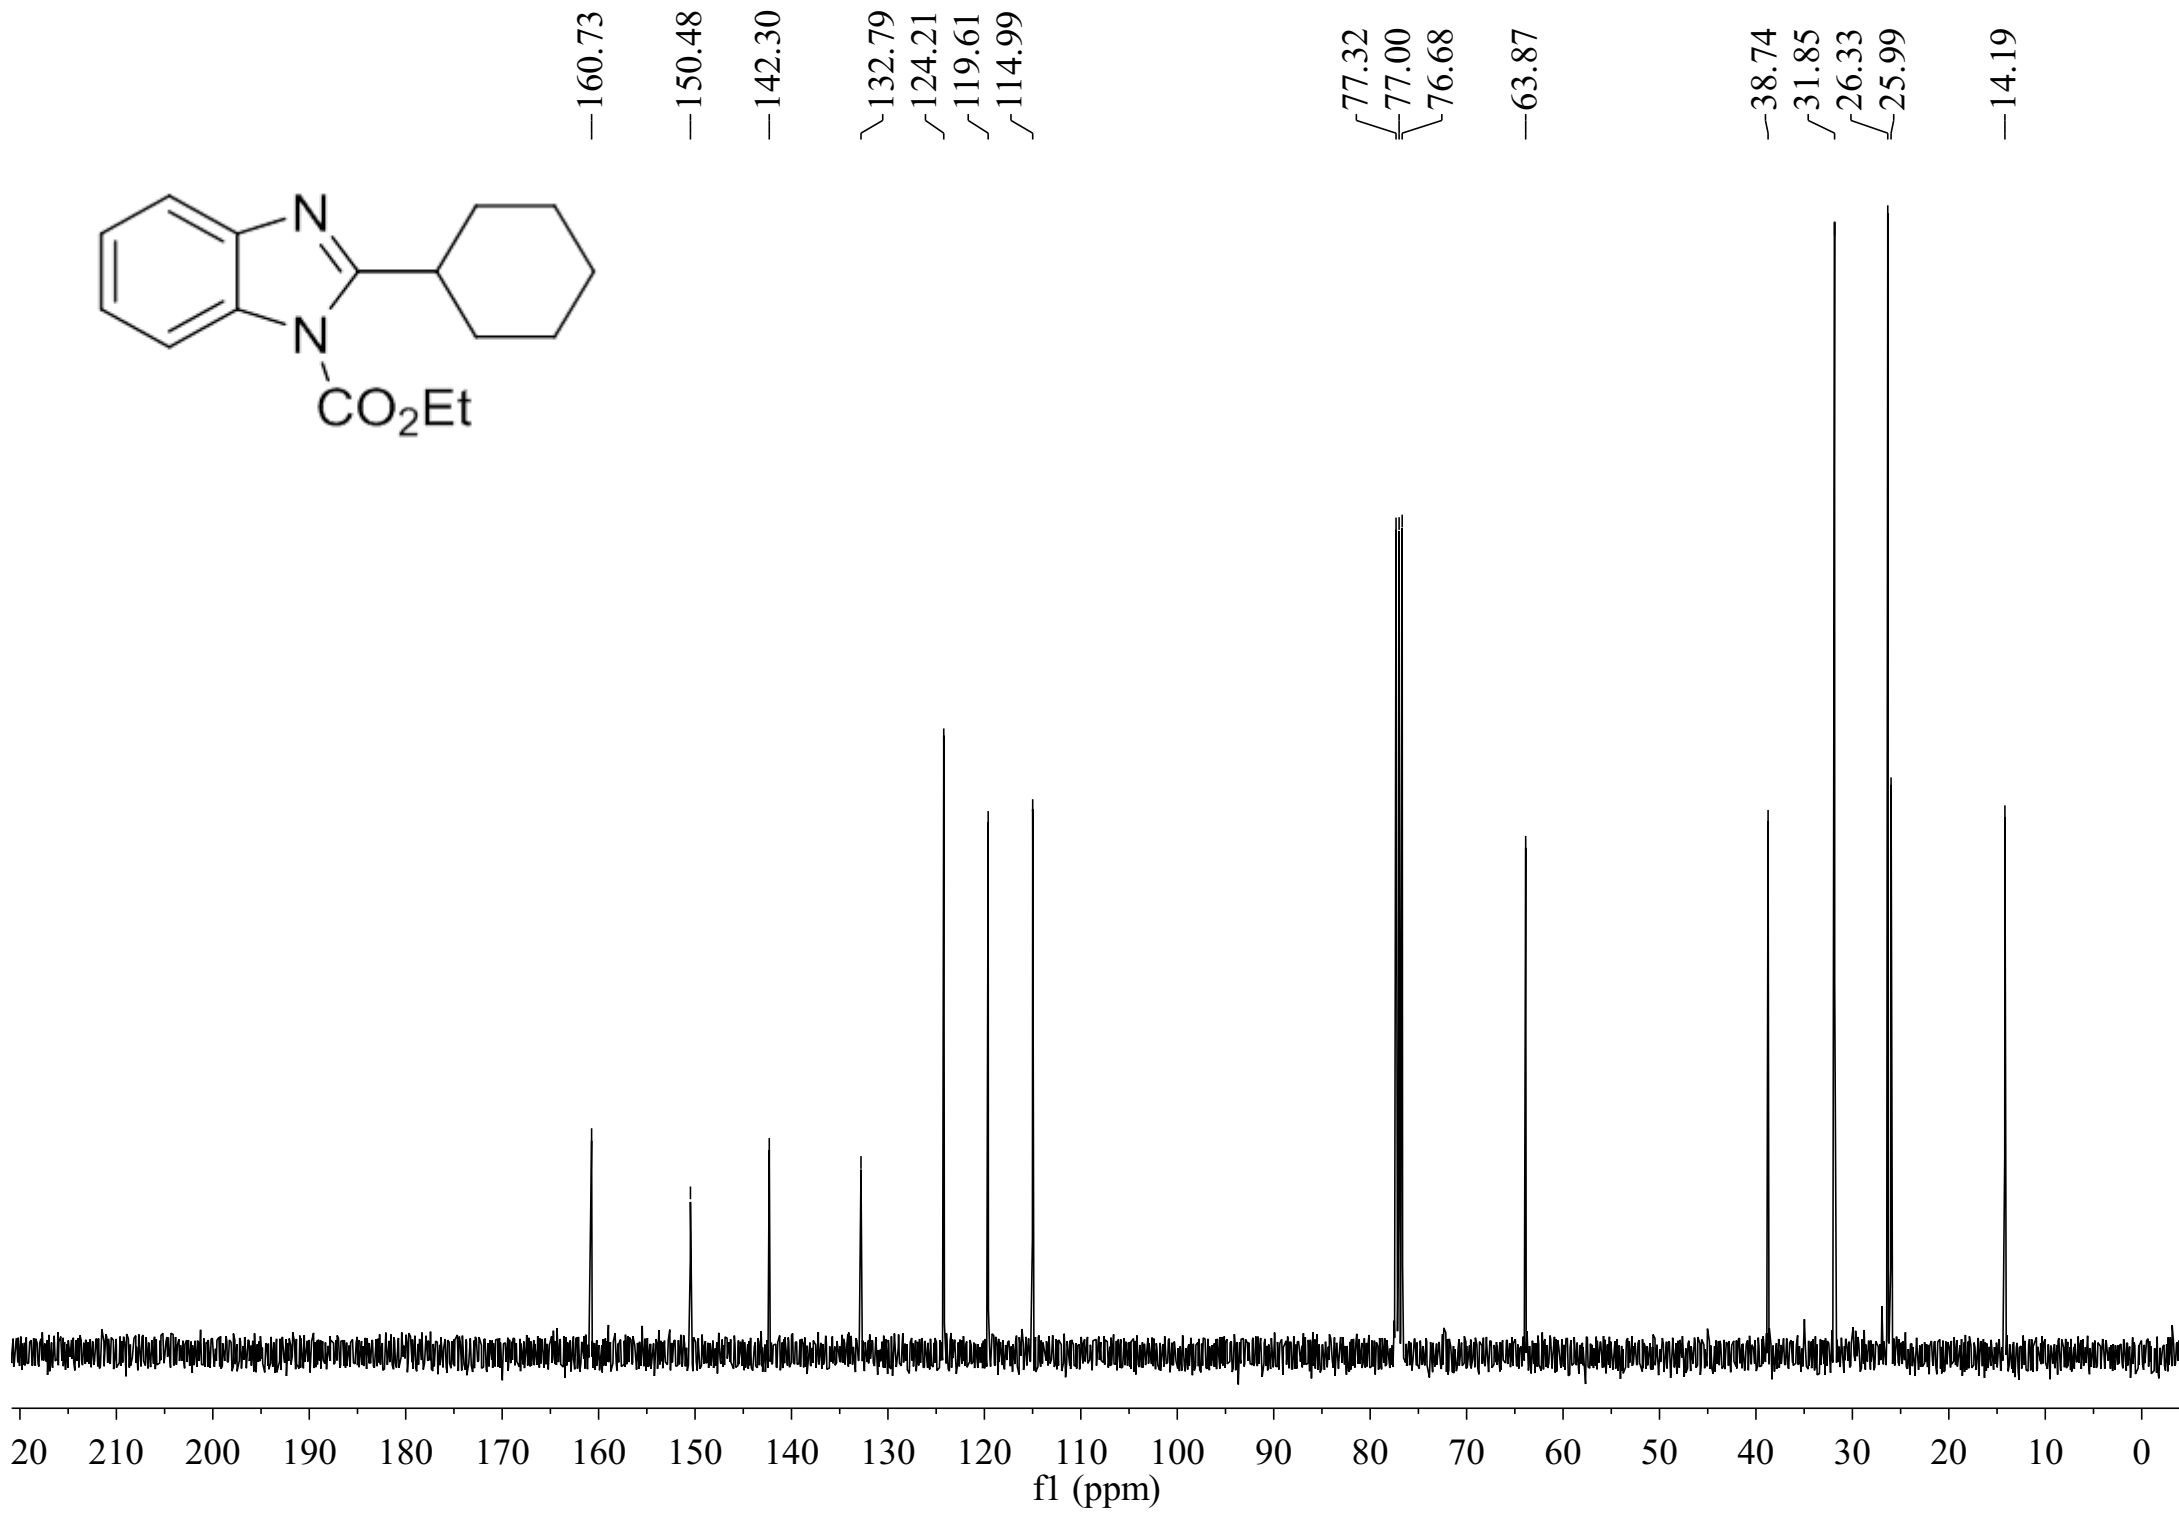

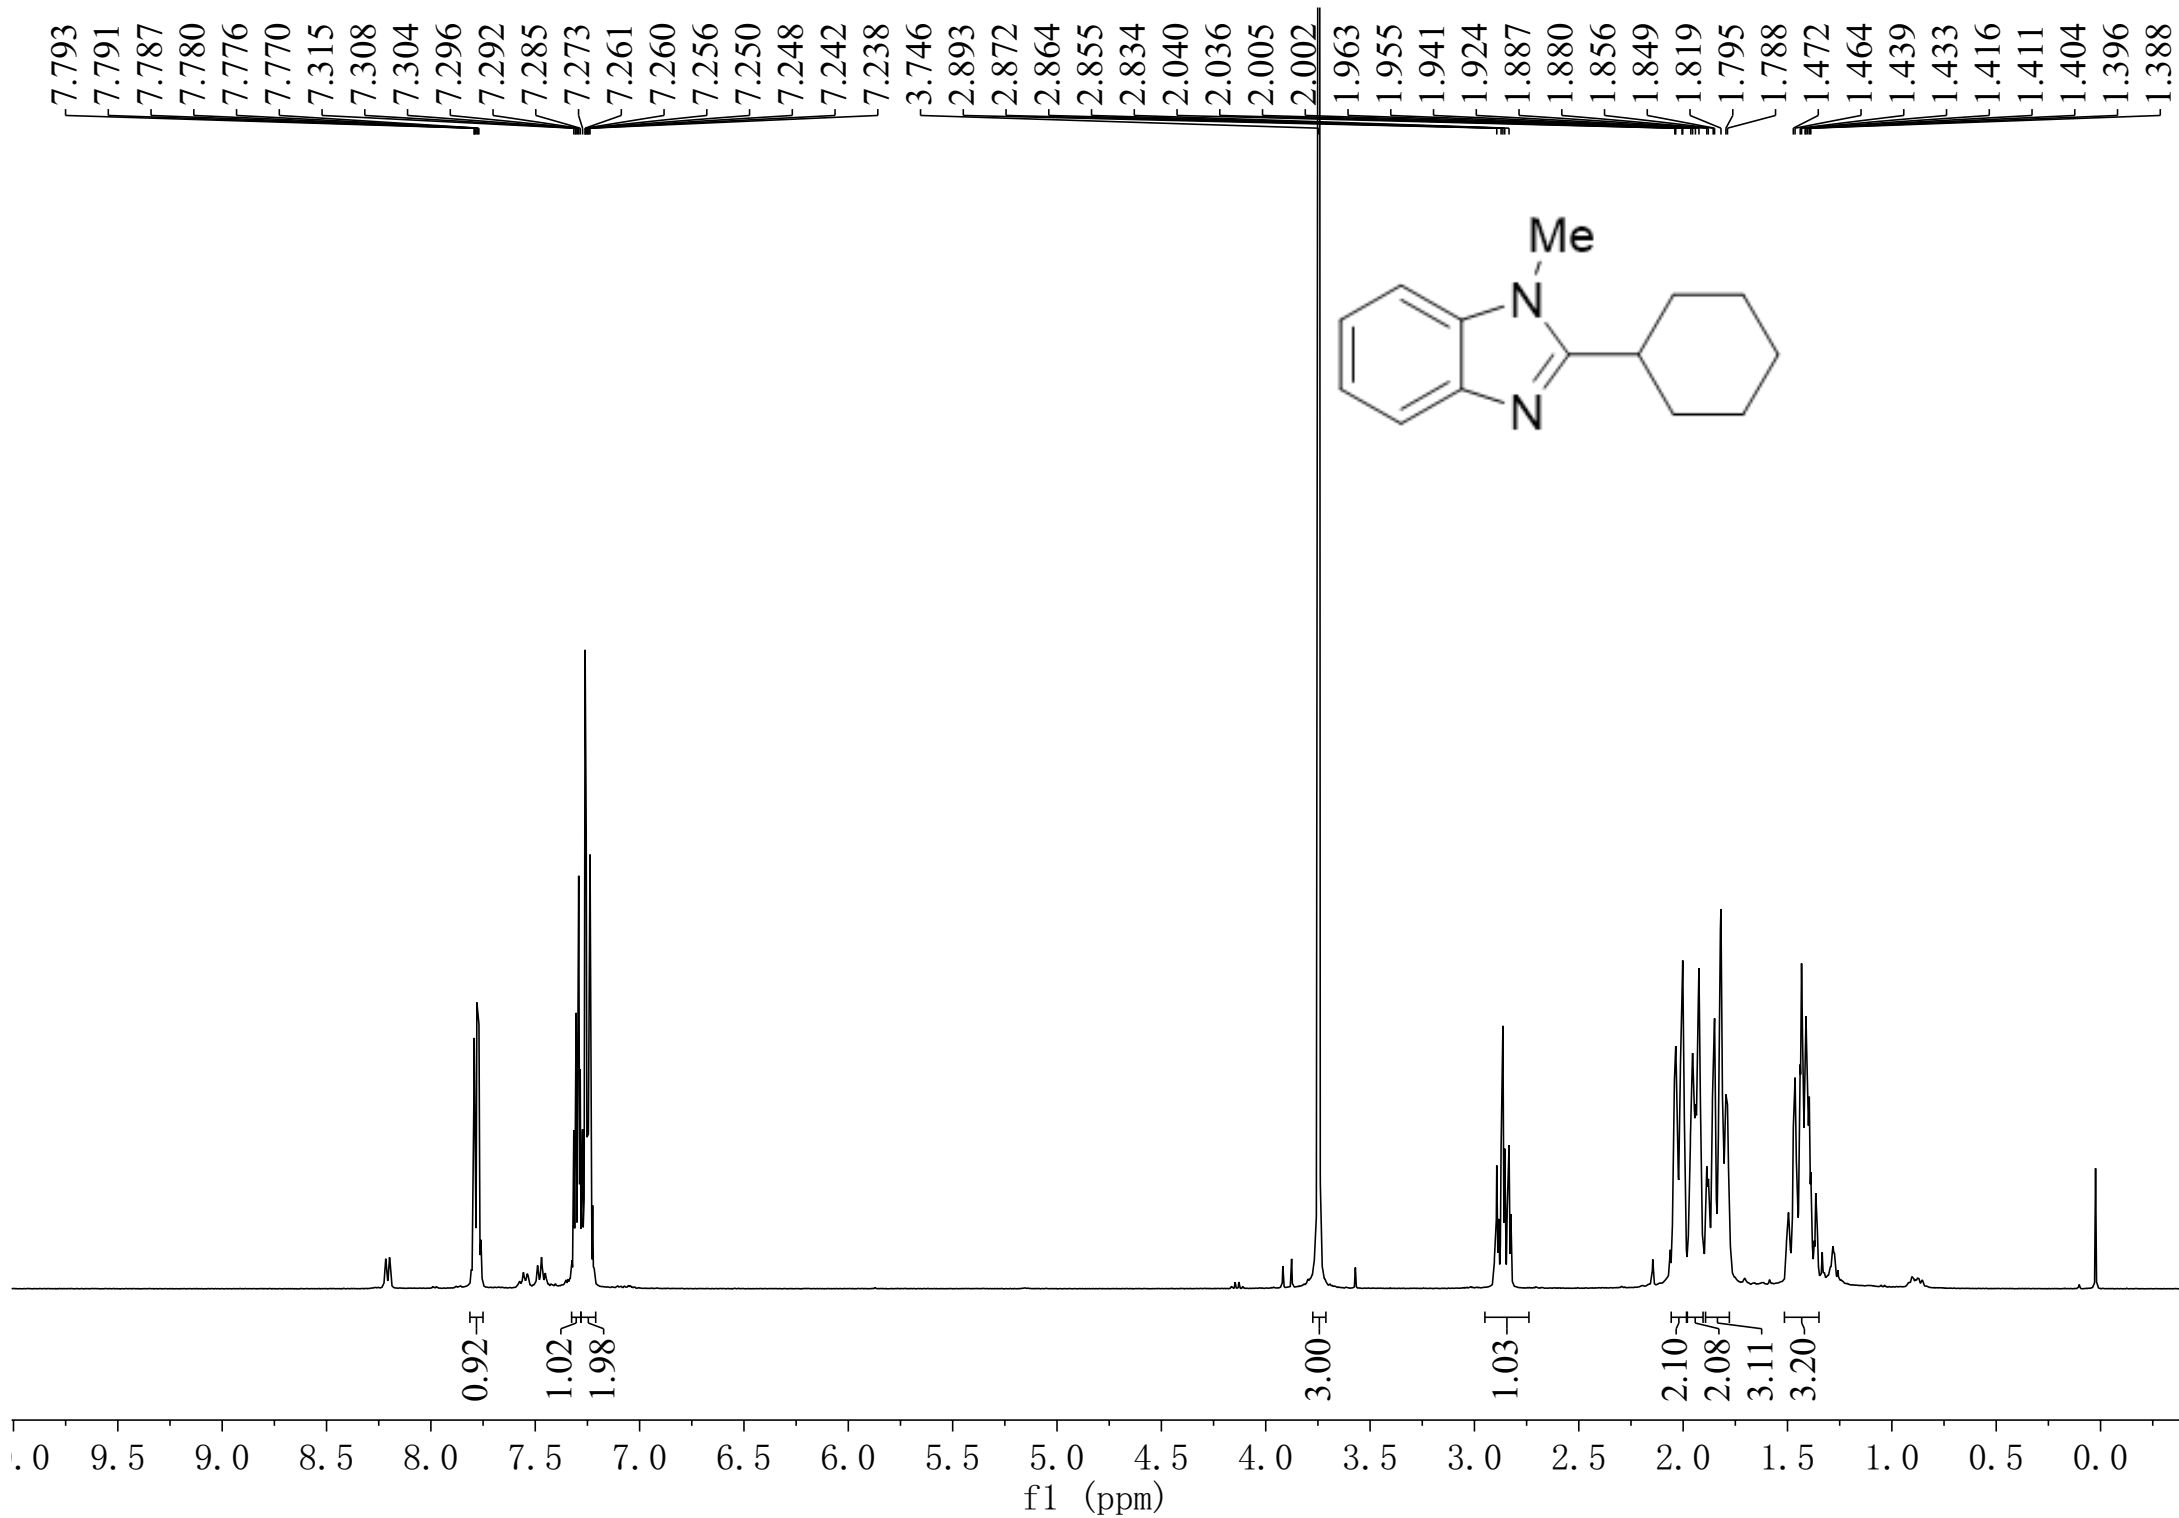

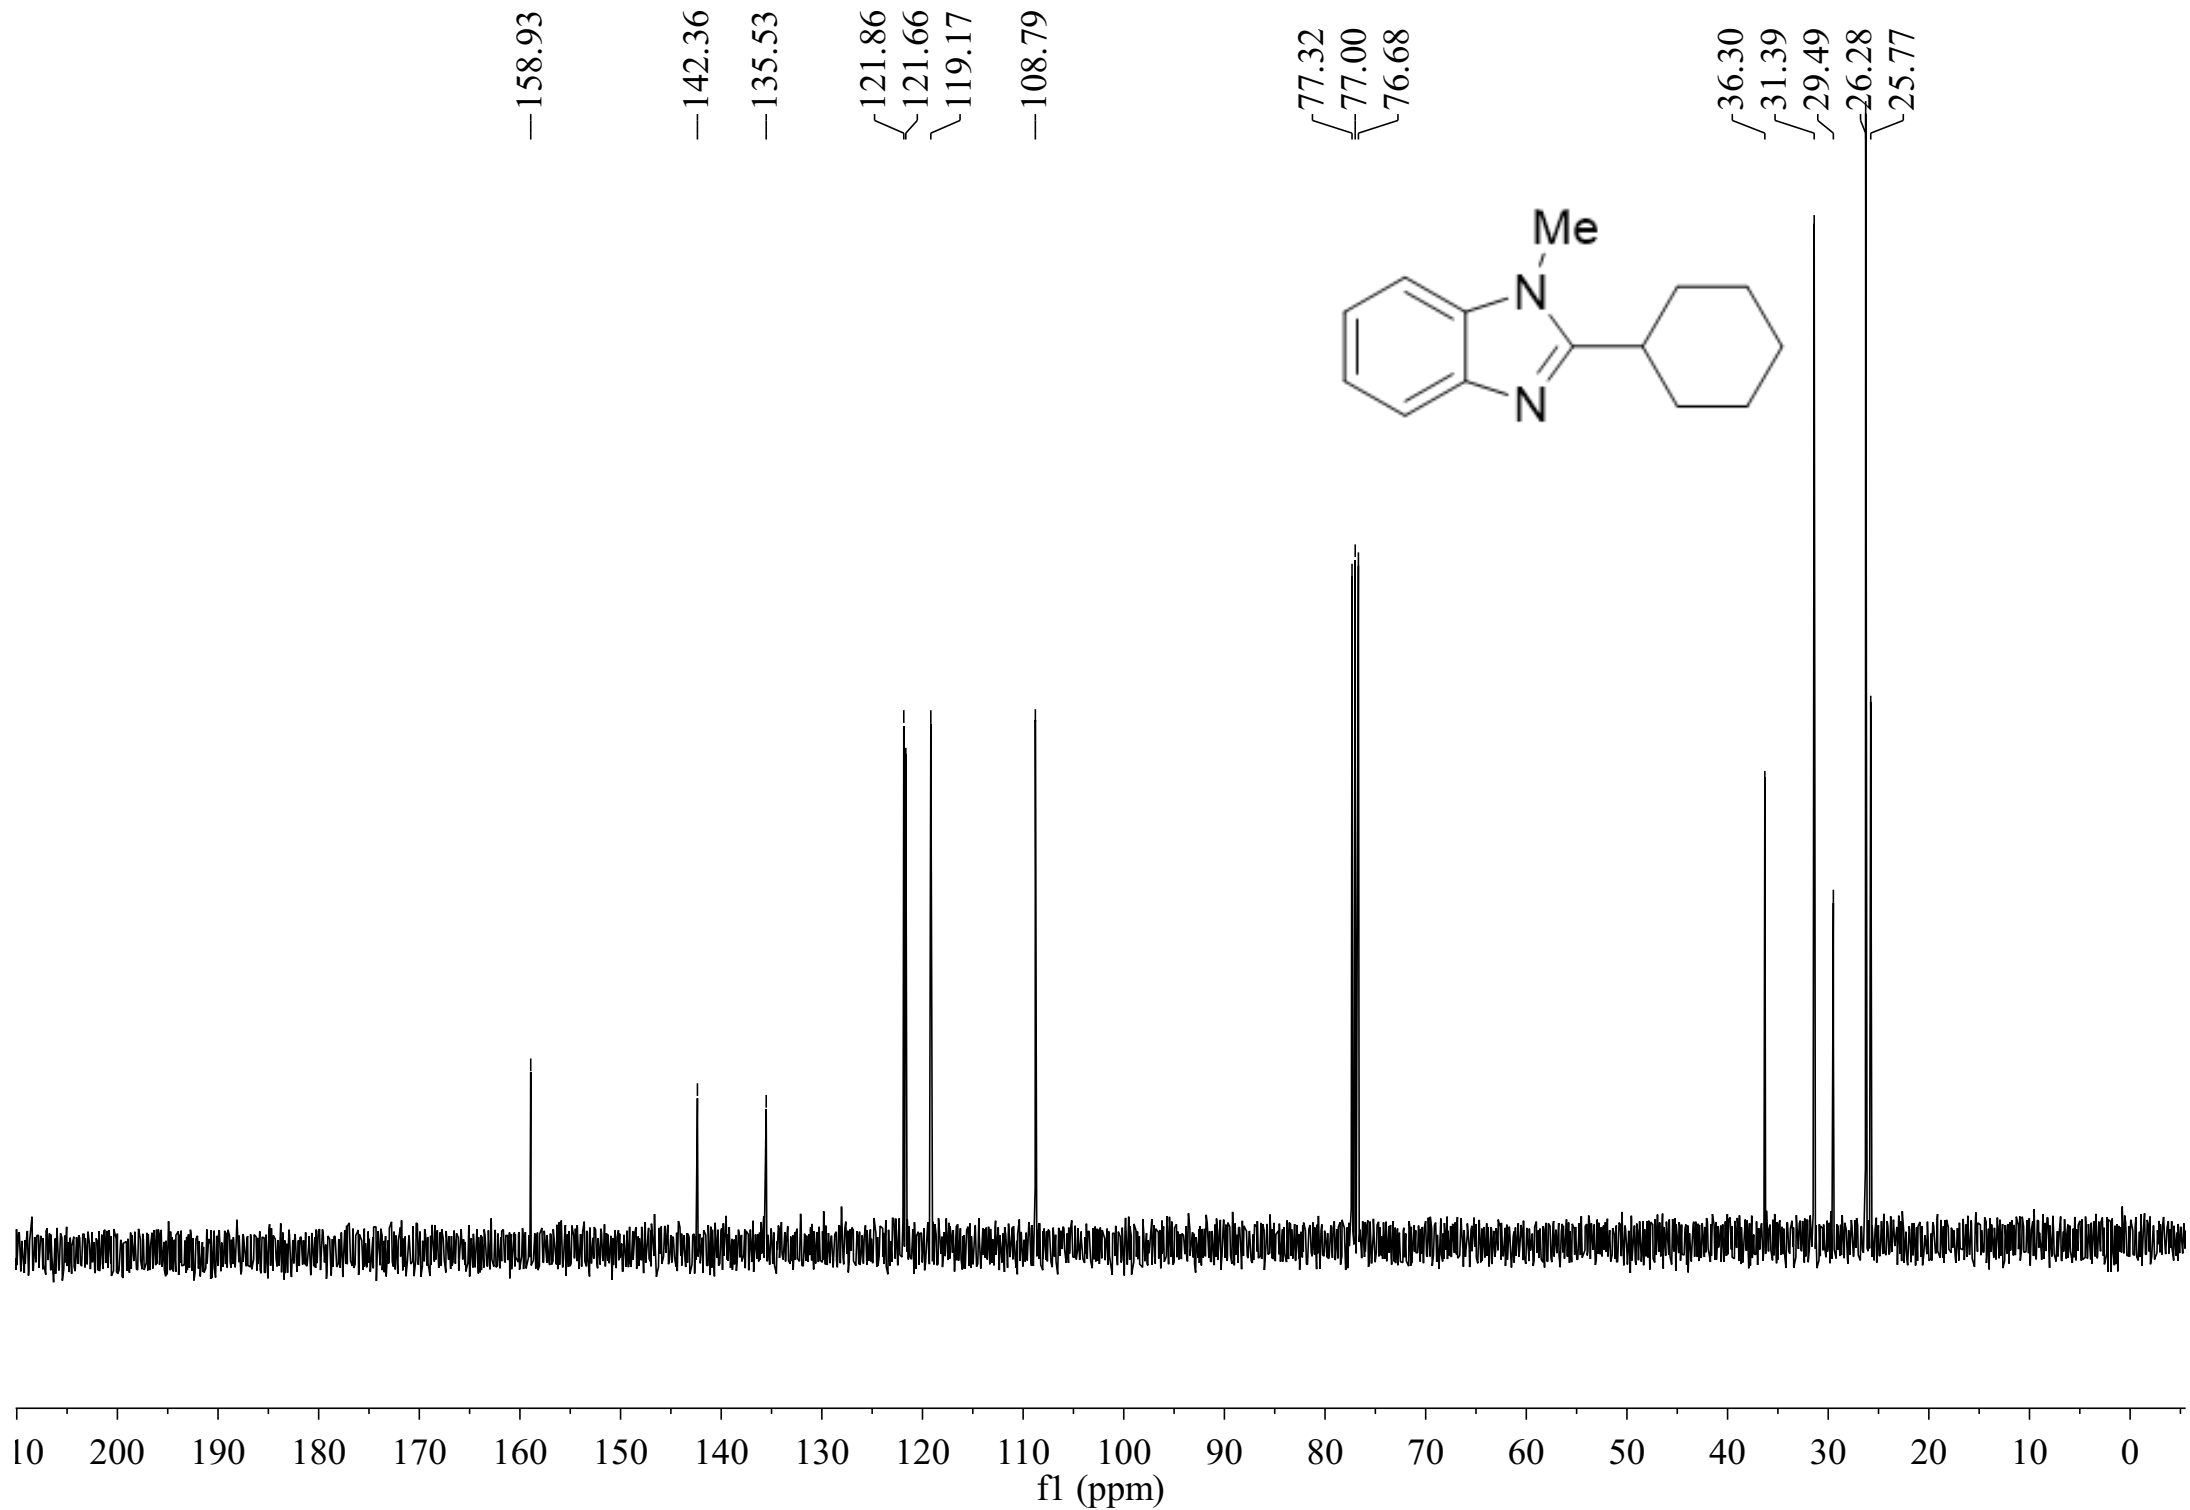



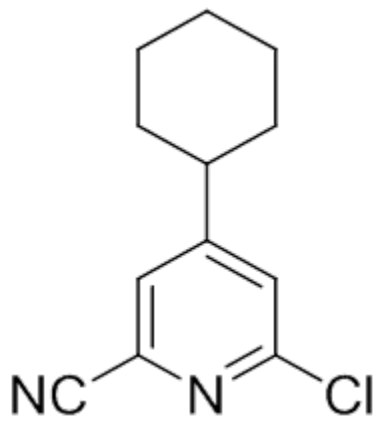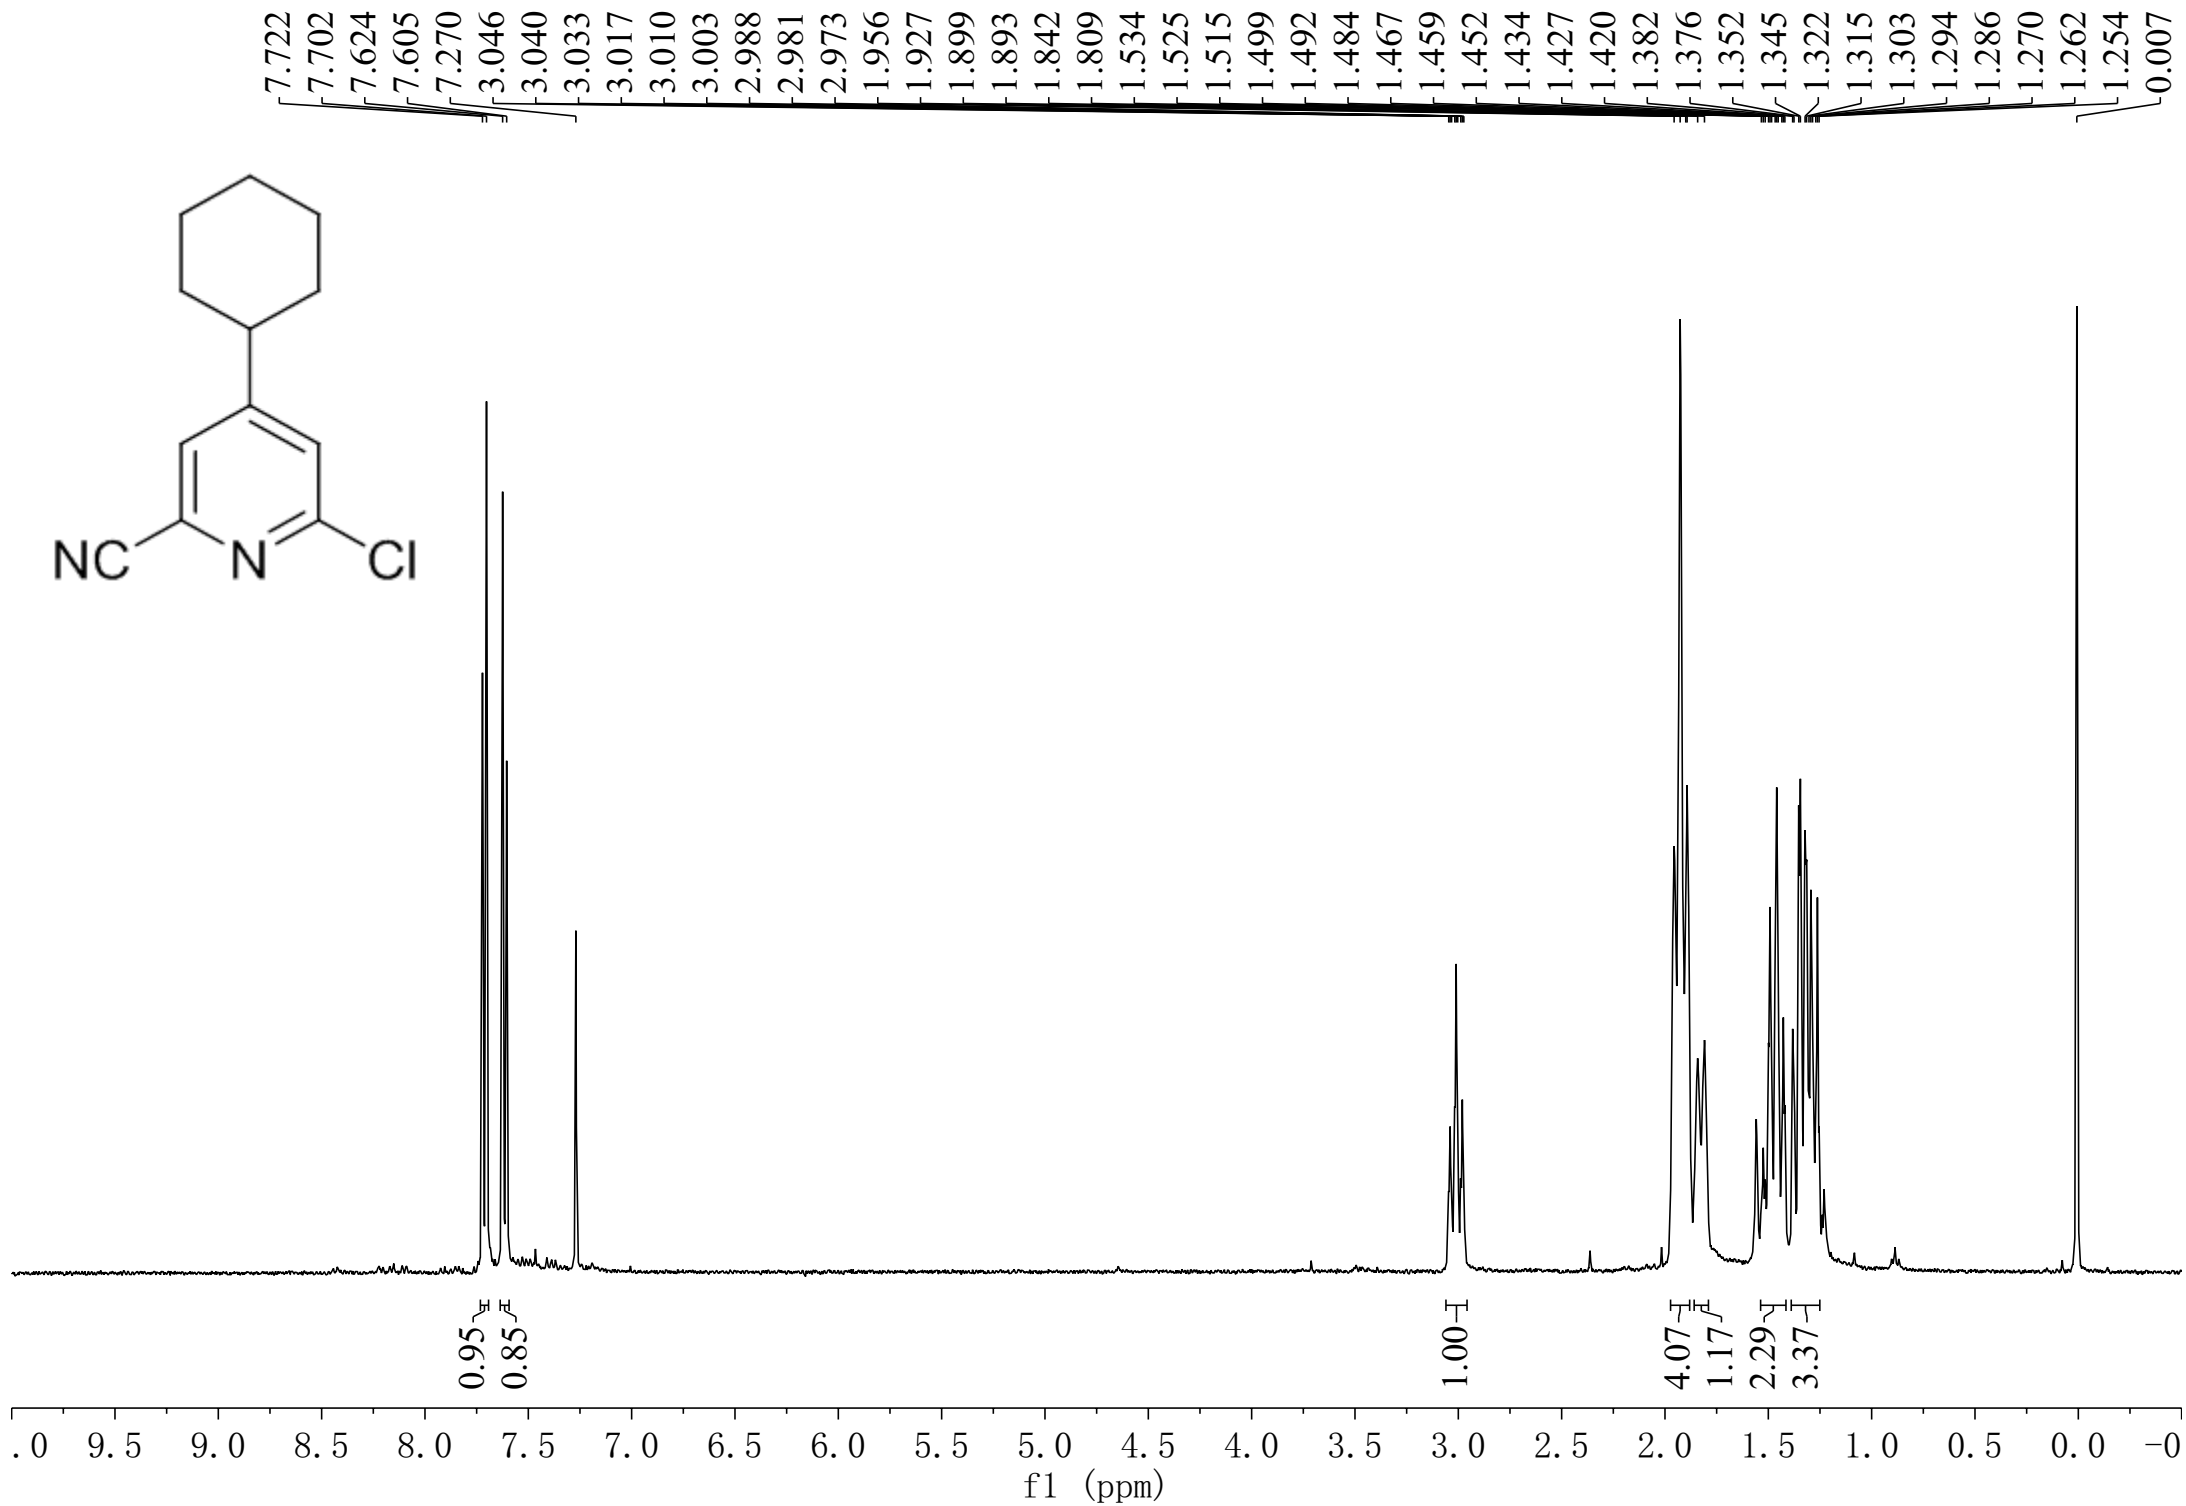

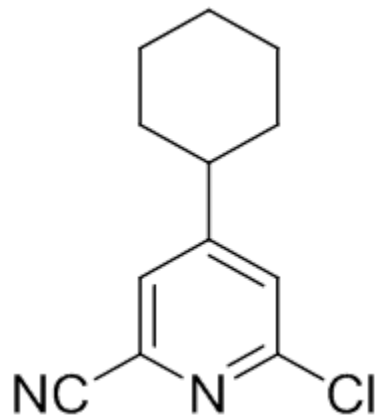

-152.14  
-146.31  
-136.49  
-130.21  
-127.59  
-116.17

77.32  
77.00  
76.68

~40.70  
32.45  
26.40  
25.79

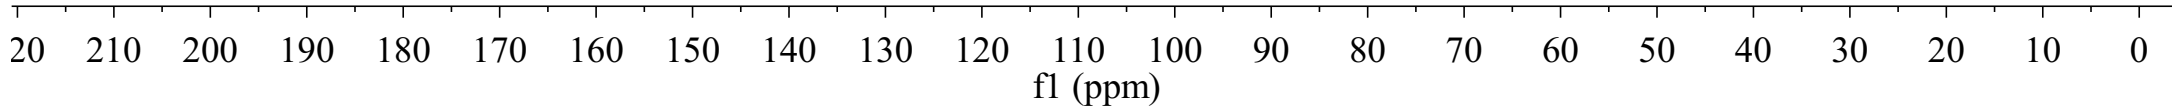

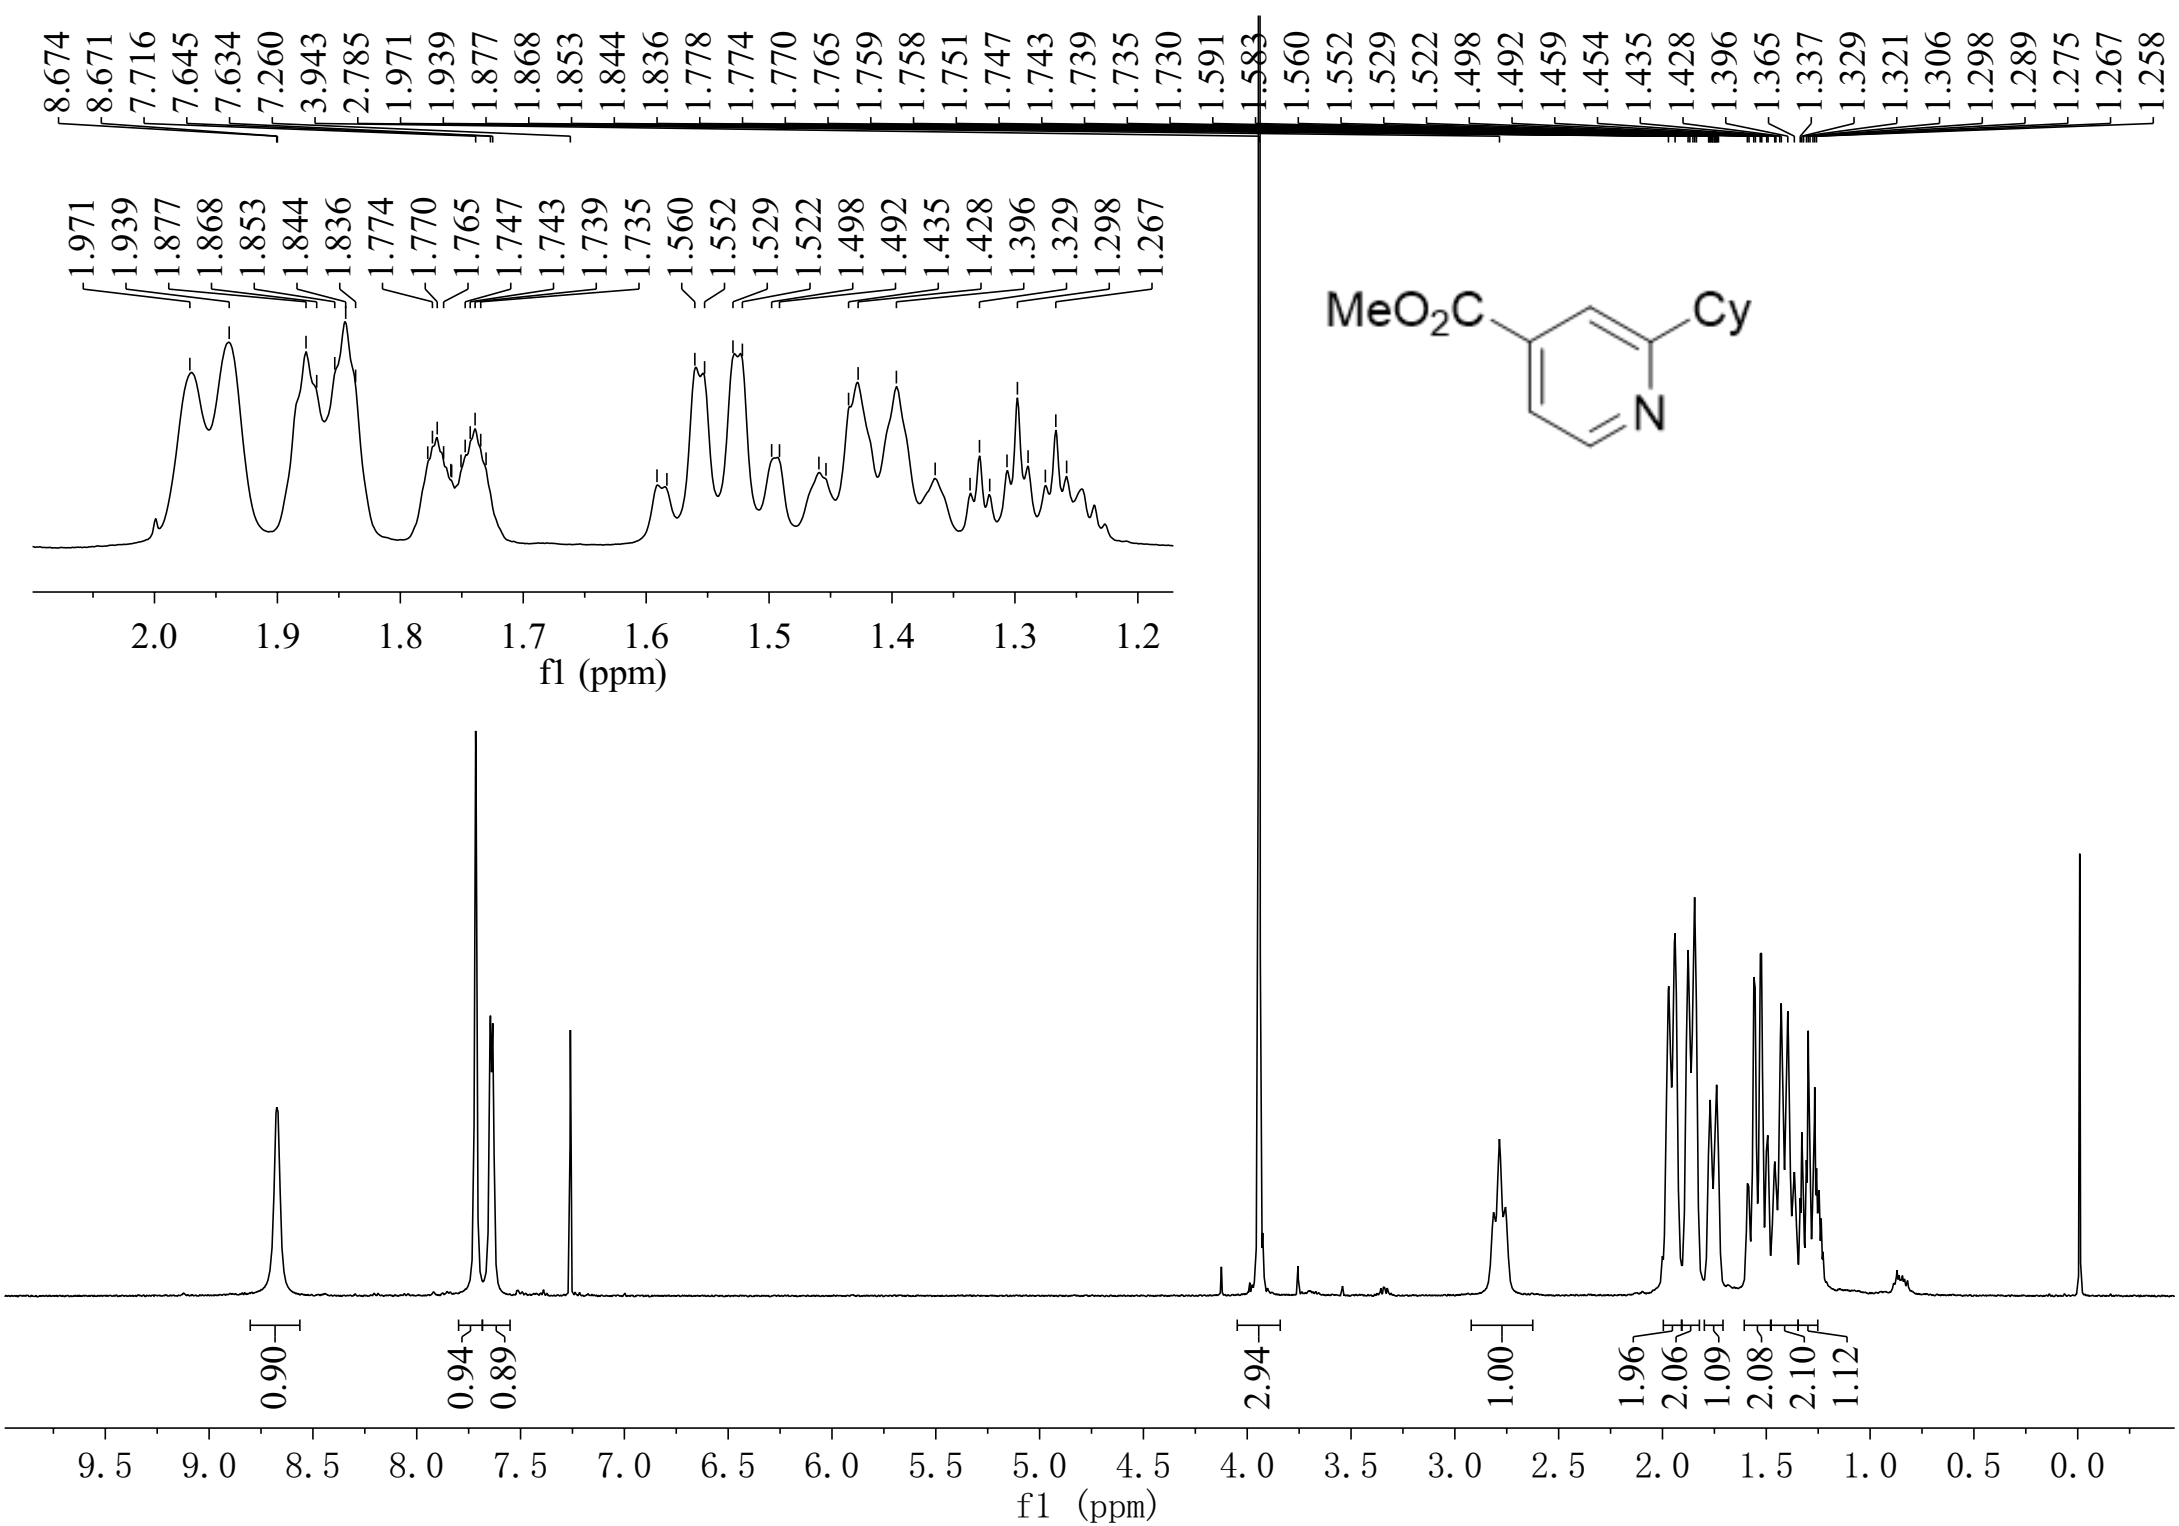

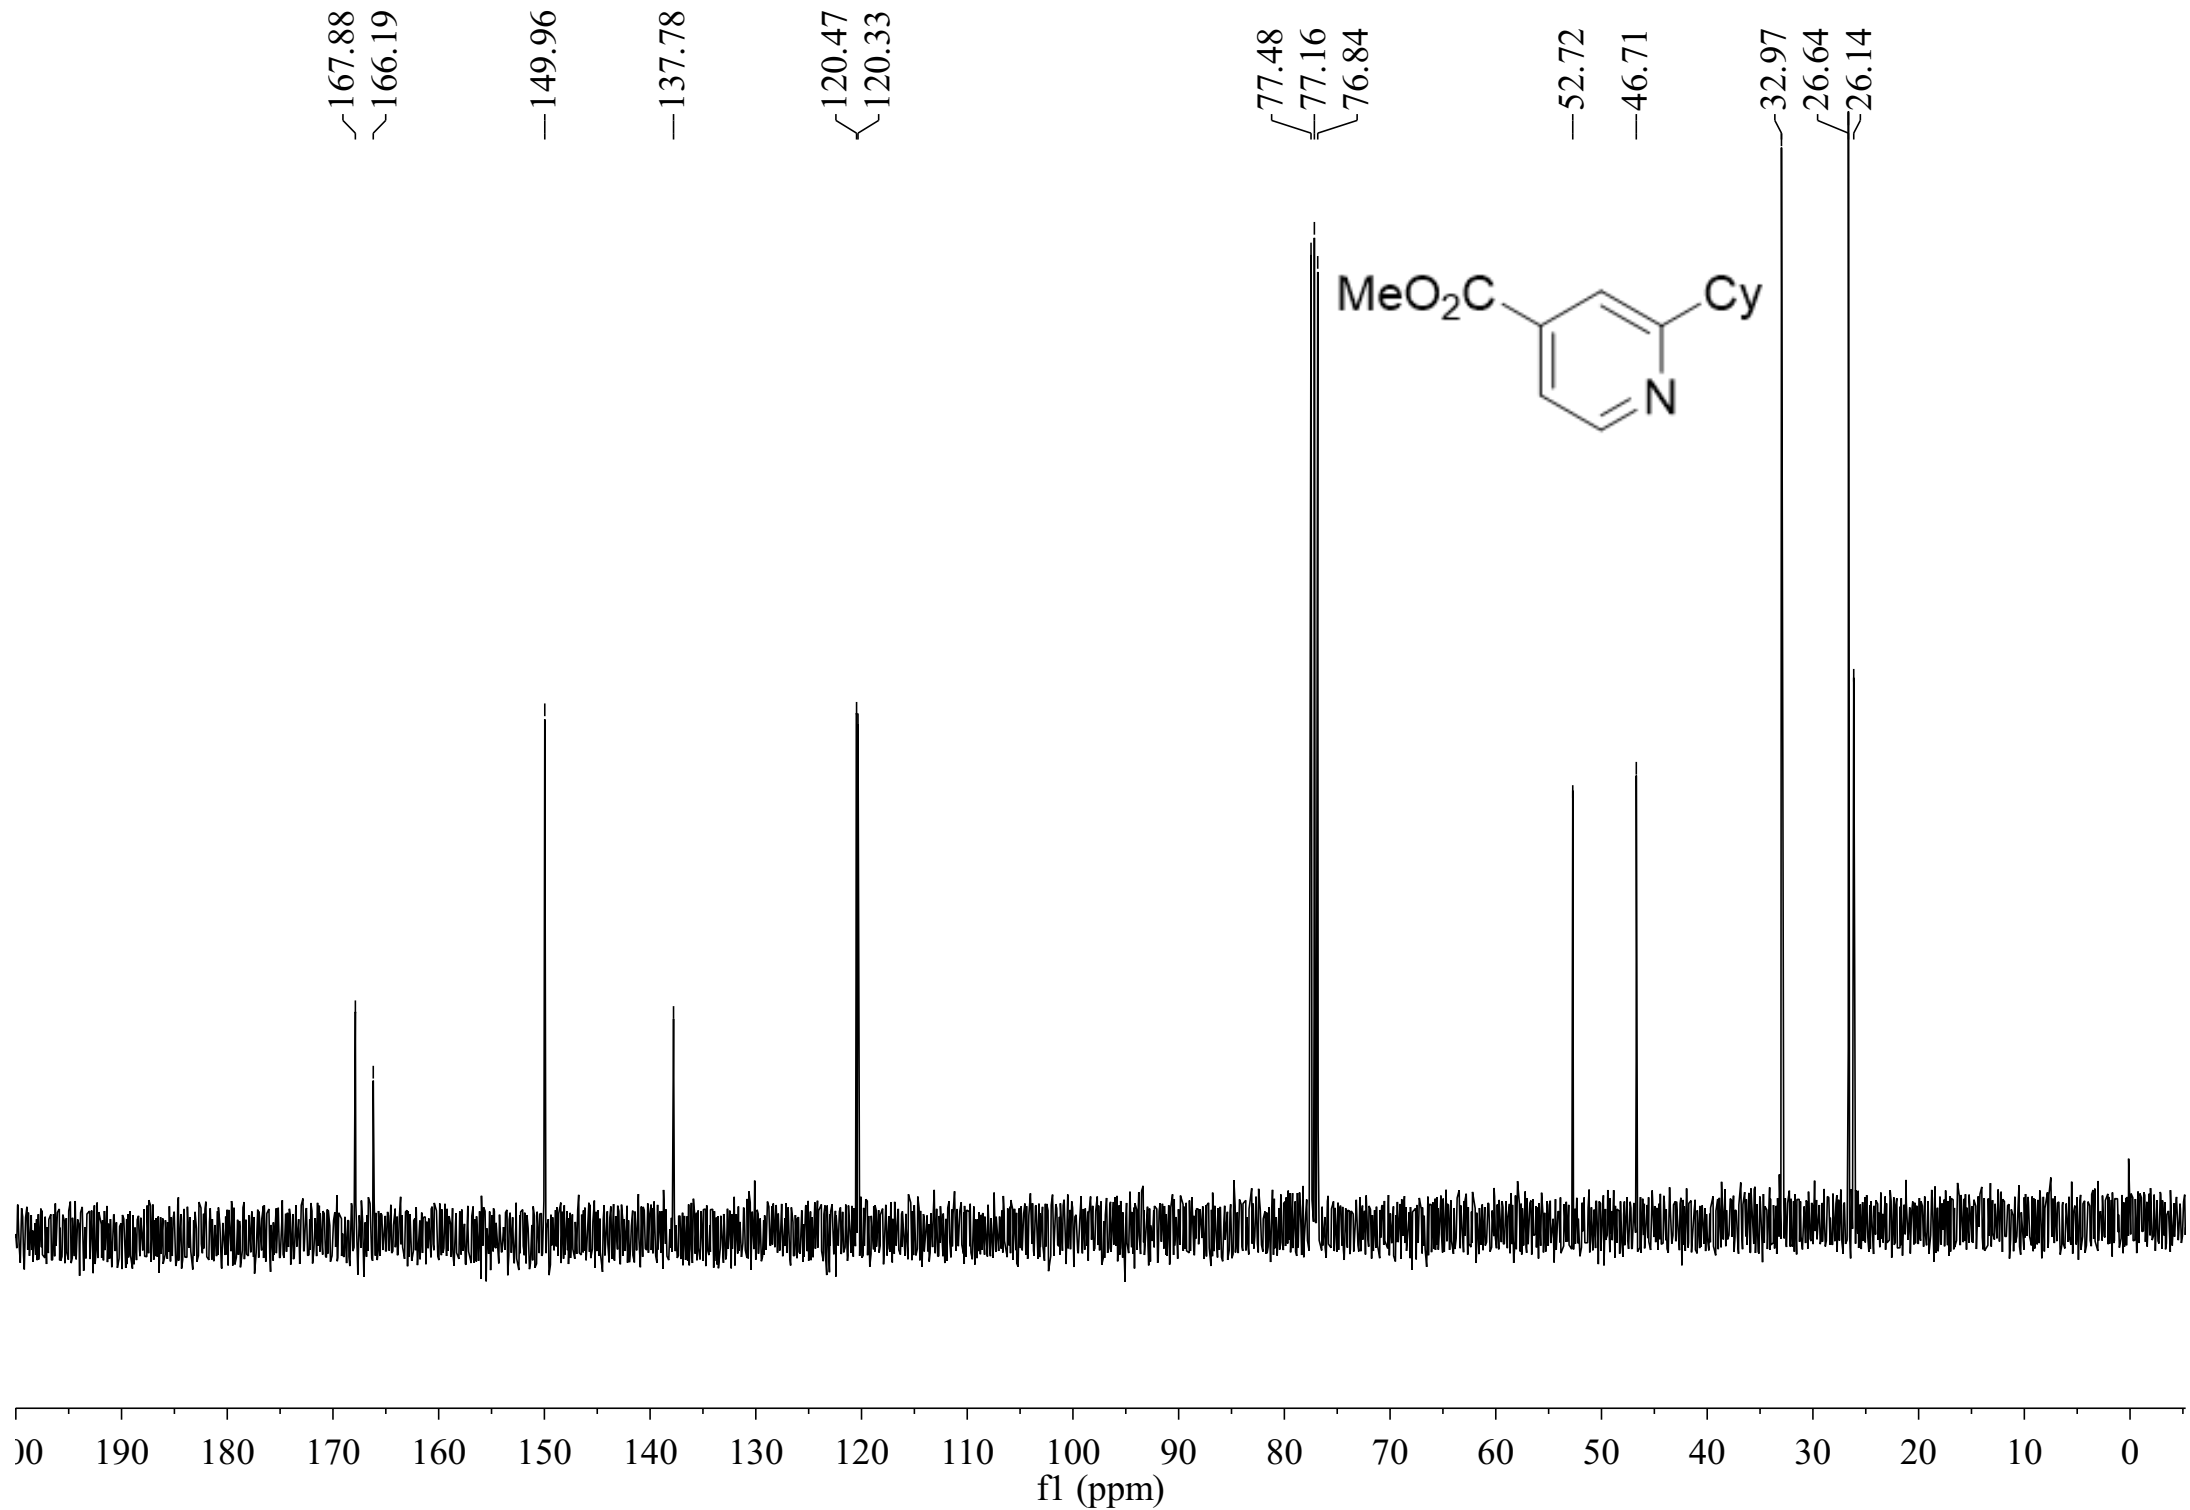

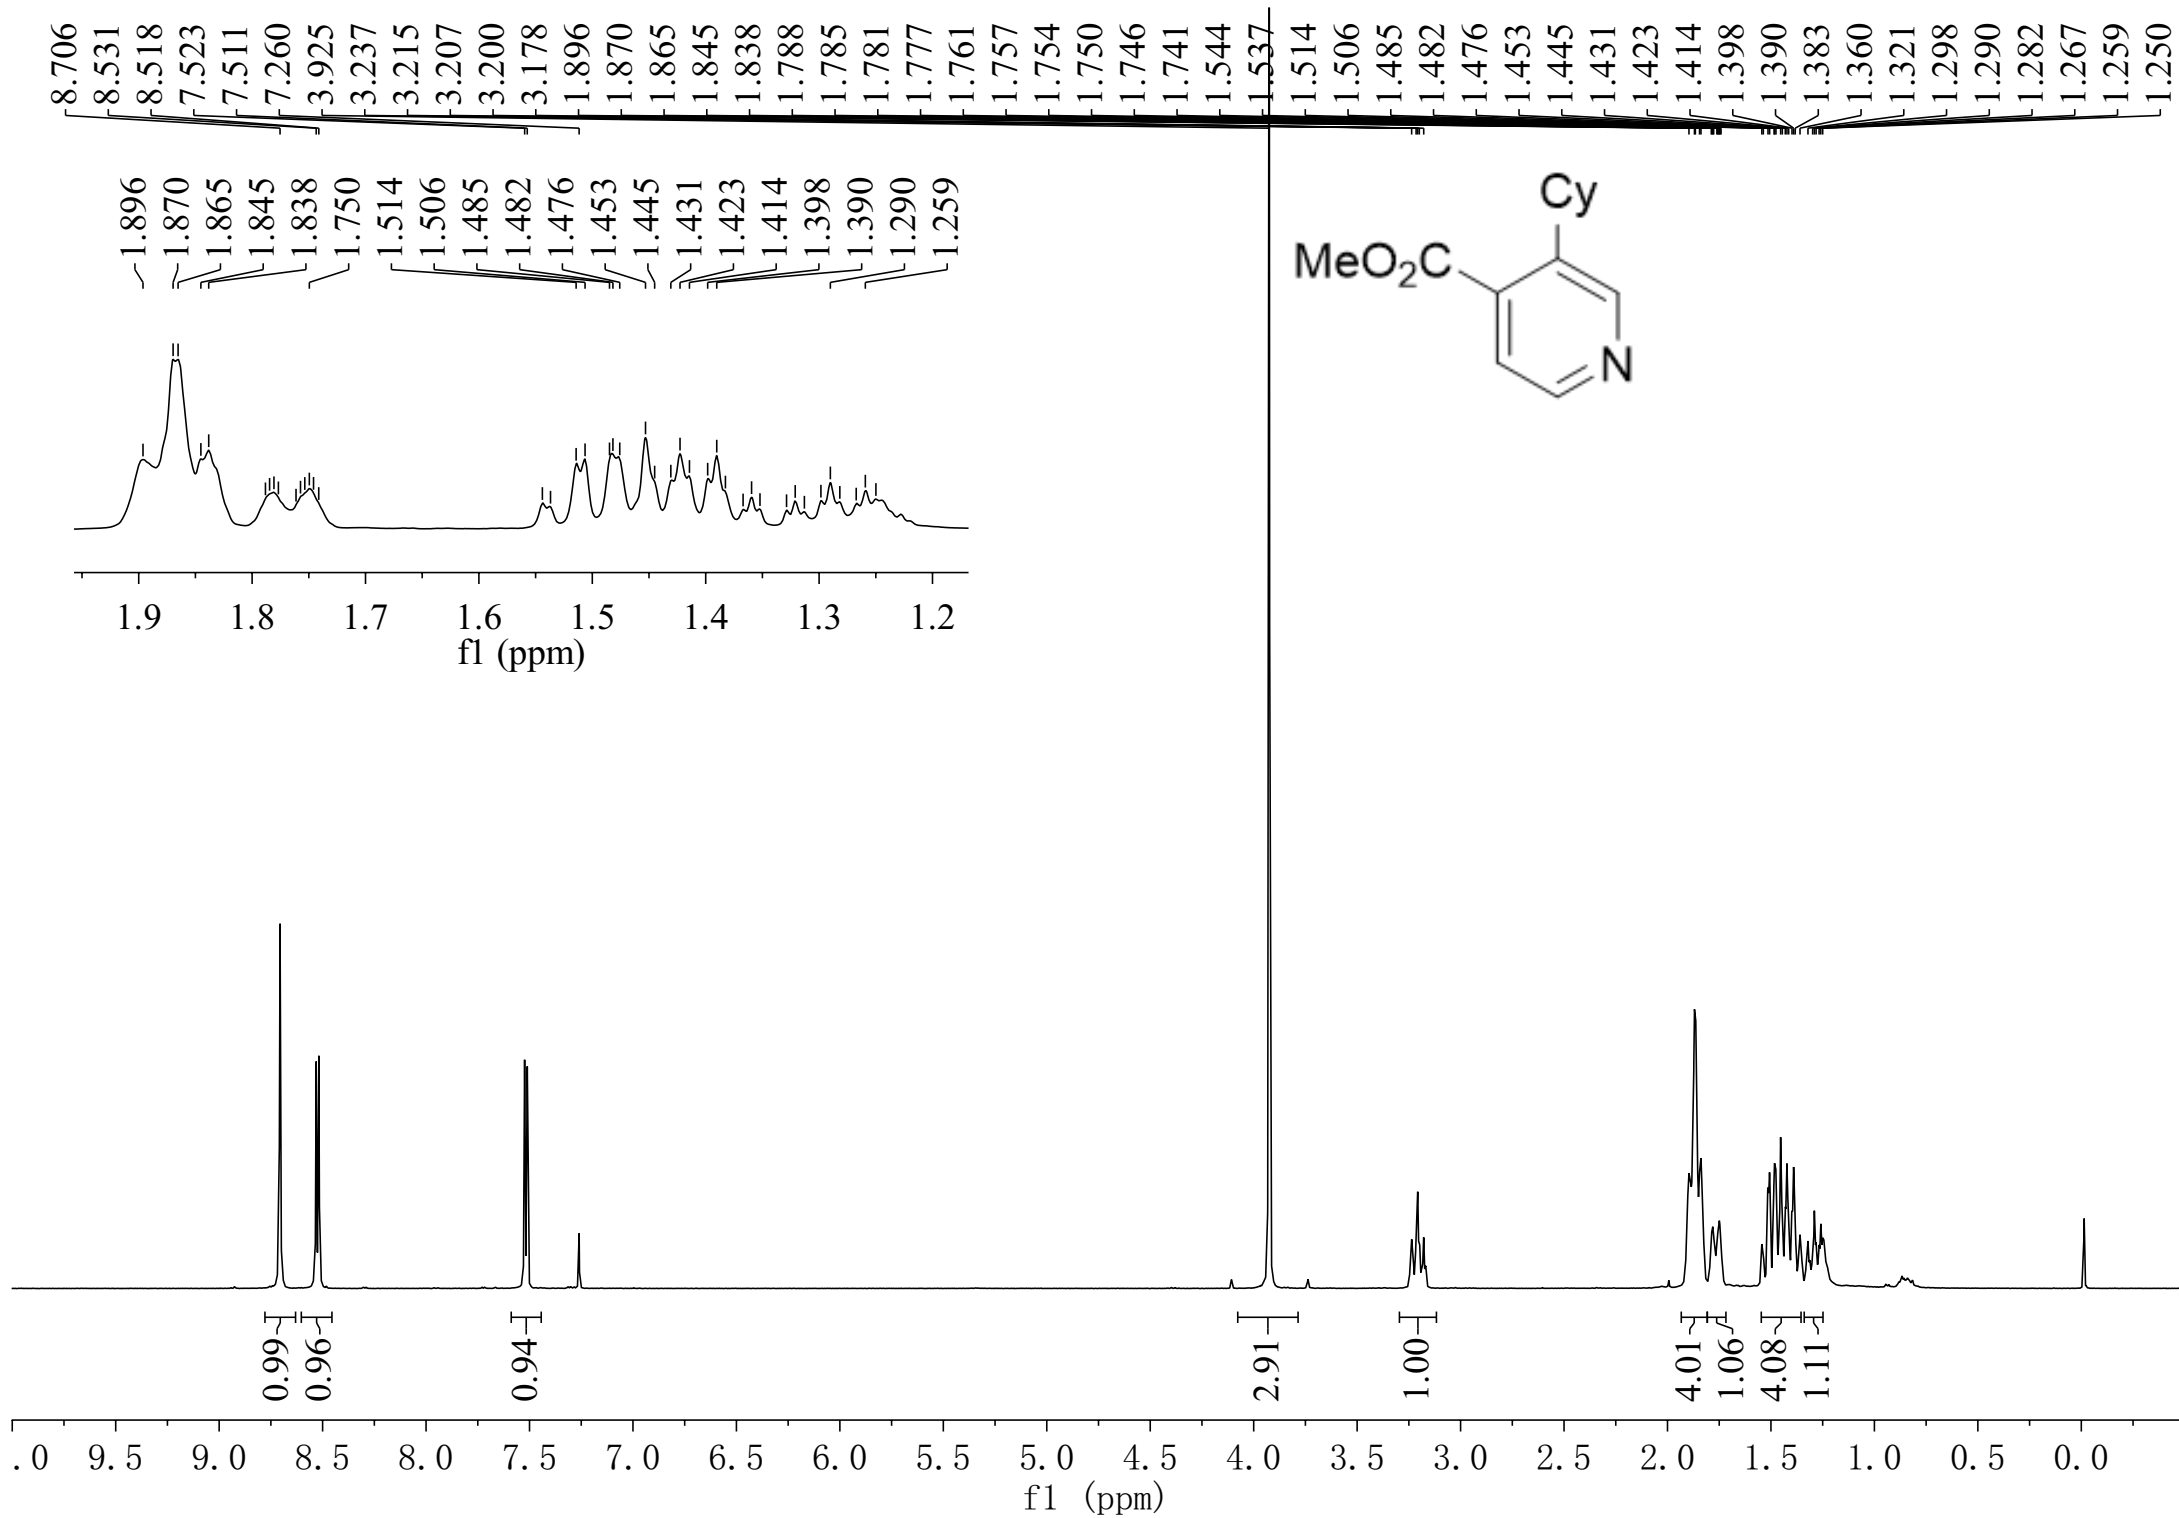

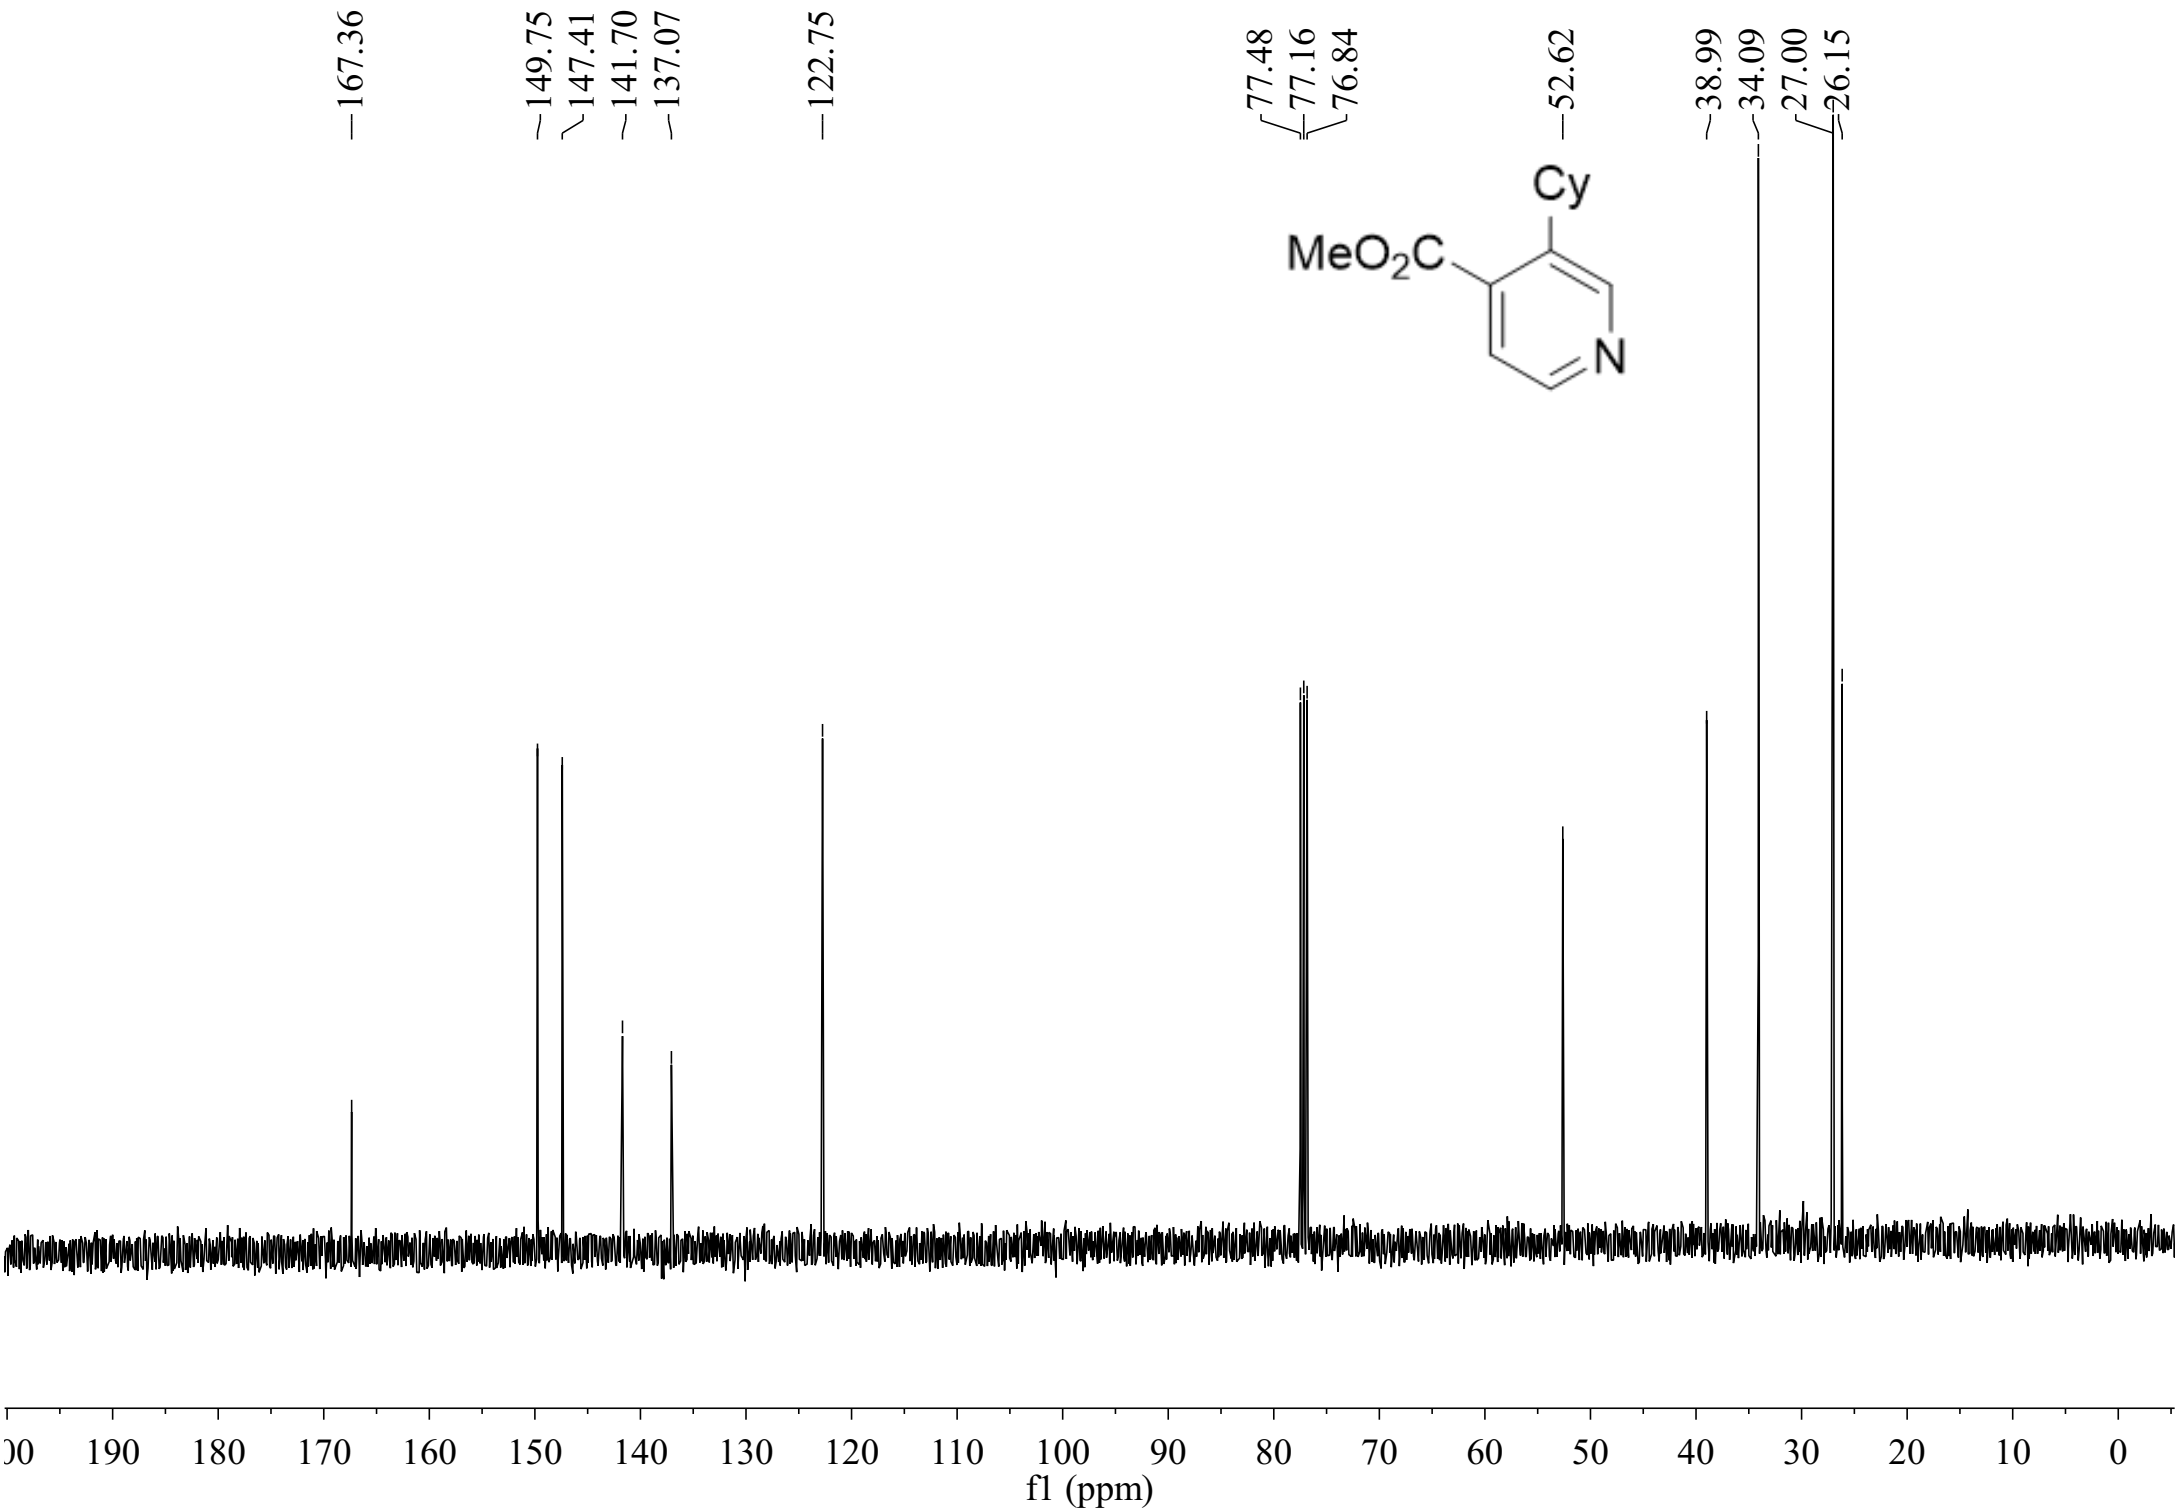

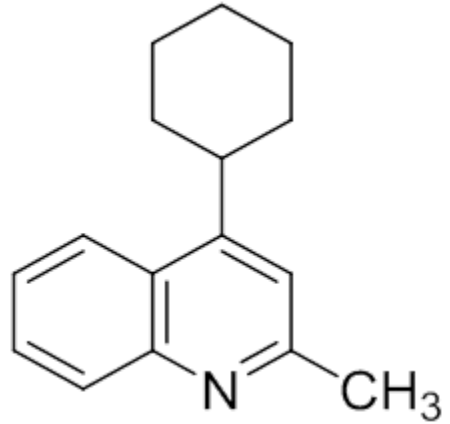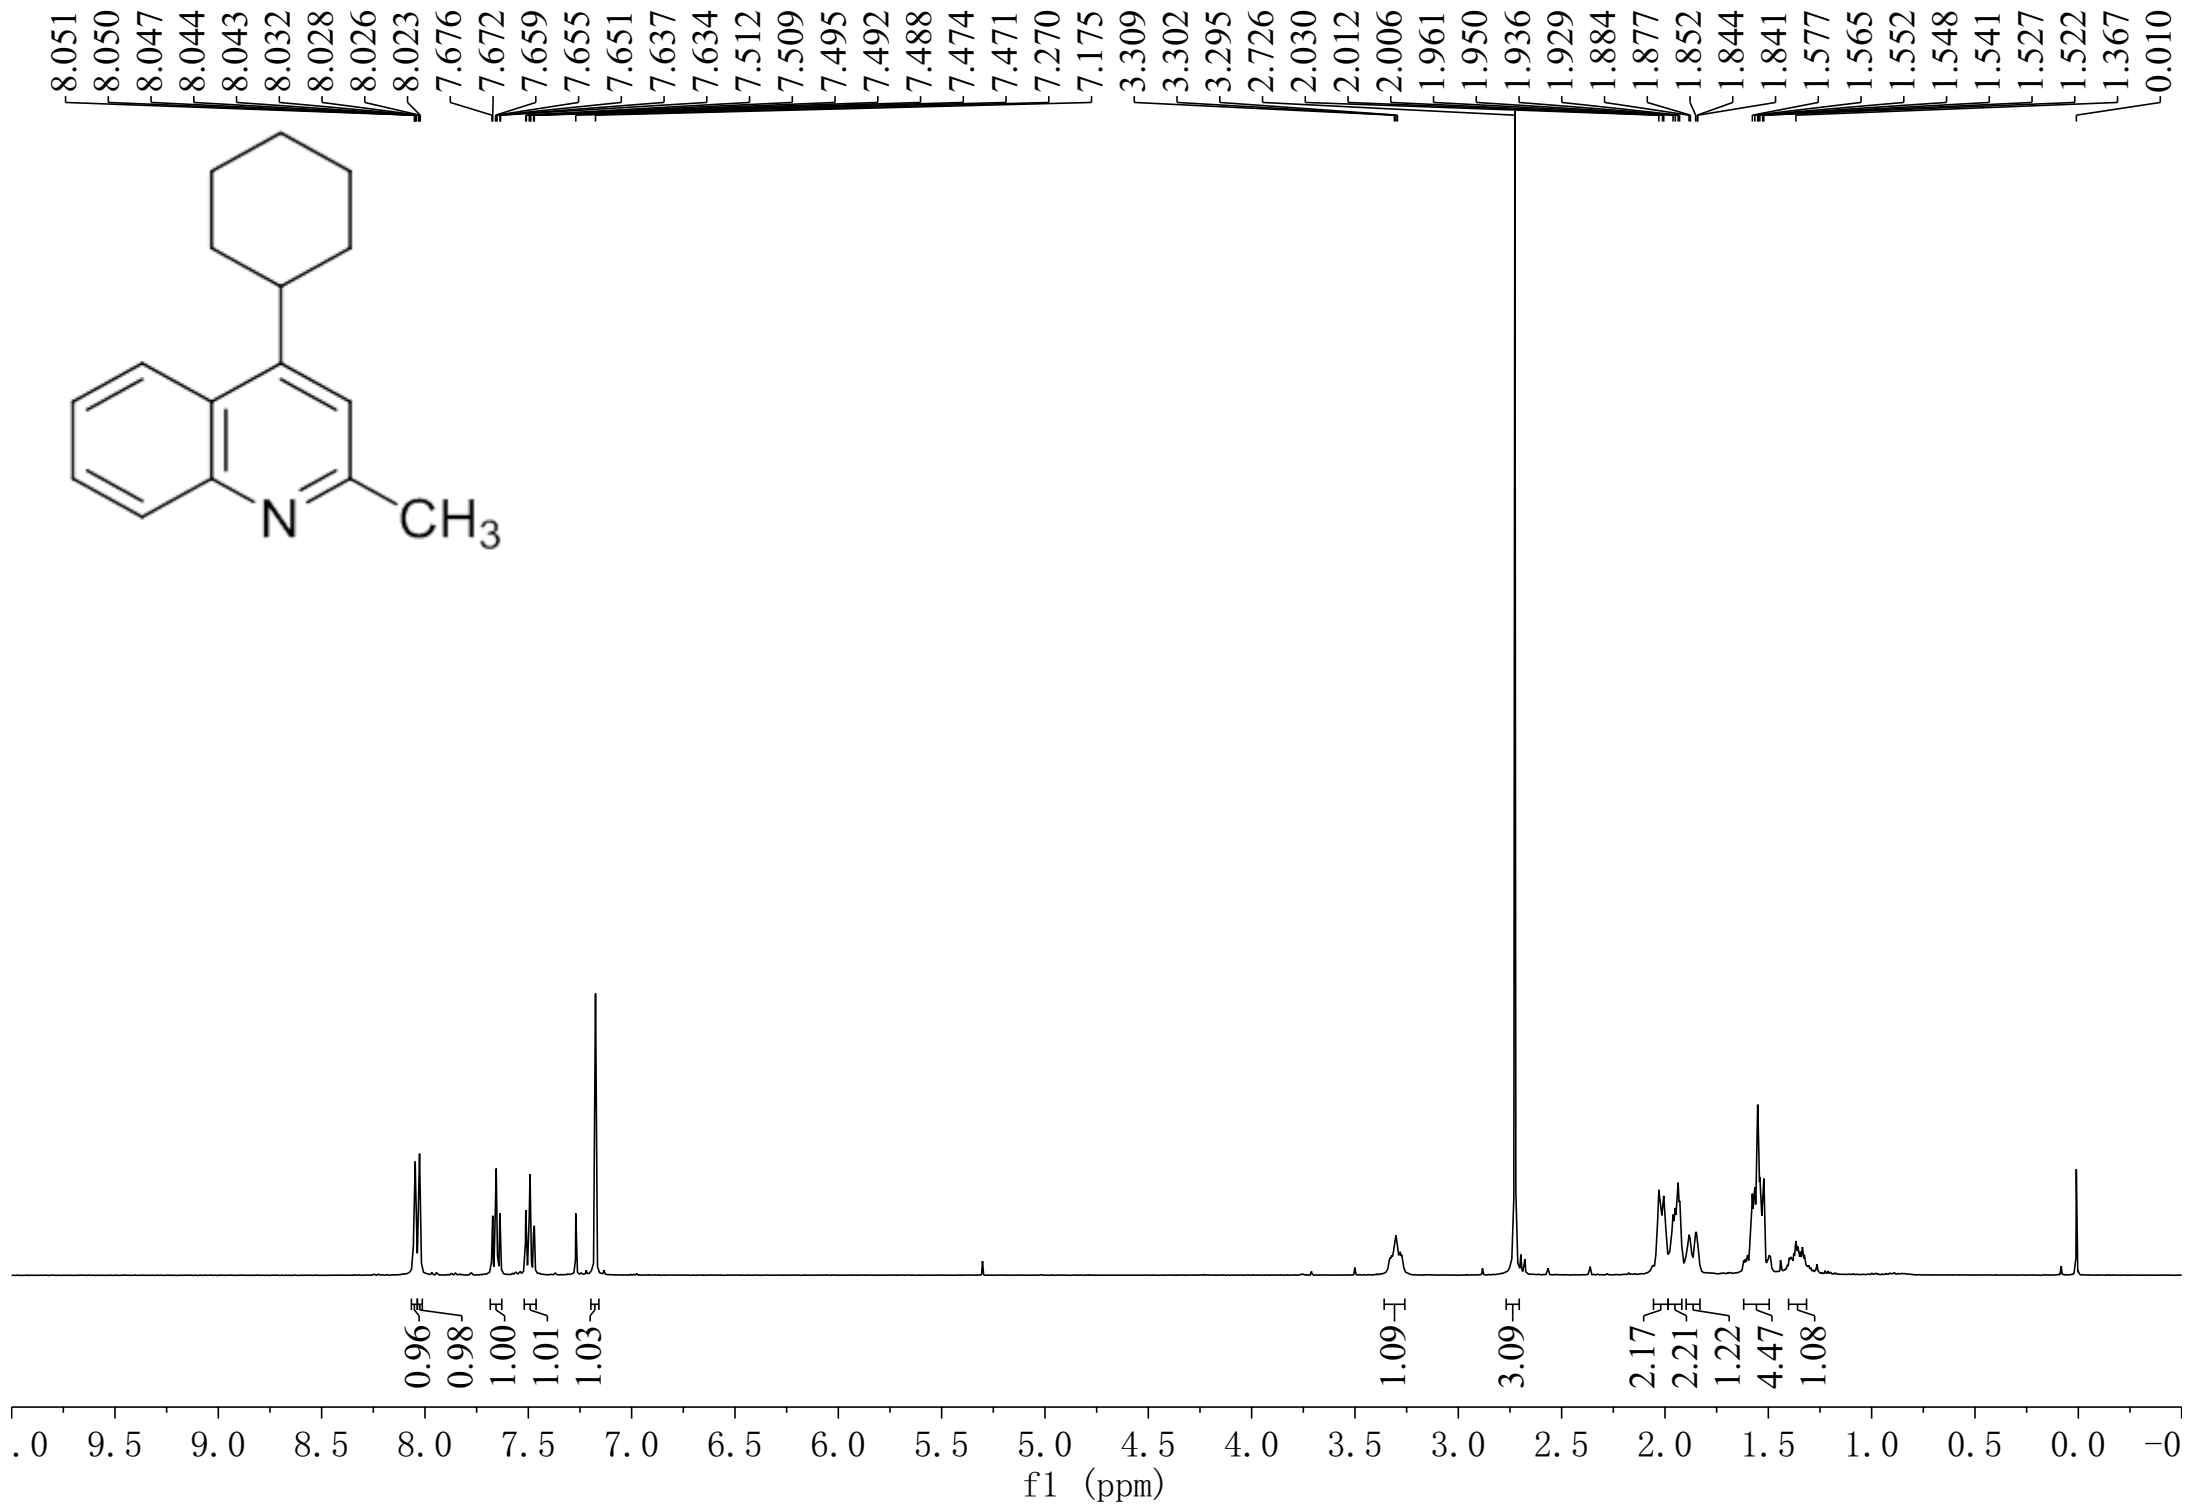

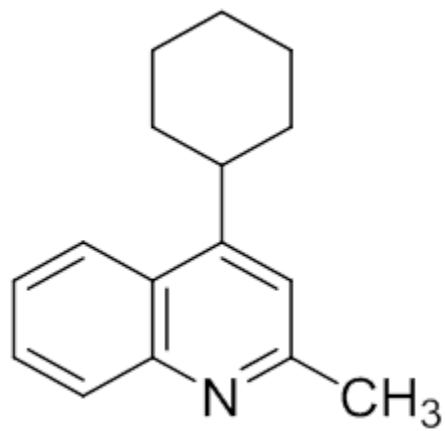

~158.81  
~153.25  
~148.20

129.58  
128.73  
125.23  
125.16  
122.81  
118.29

77.32  
77.00  
76.68

38.79  
33.58  
26.94  
26.33  
25.54

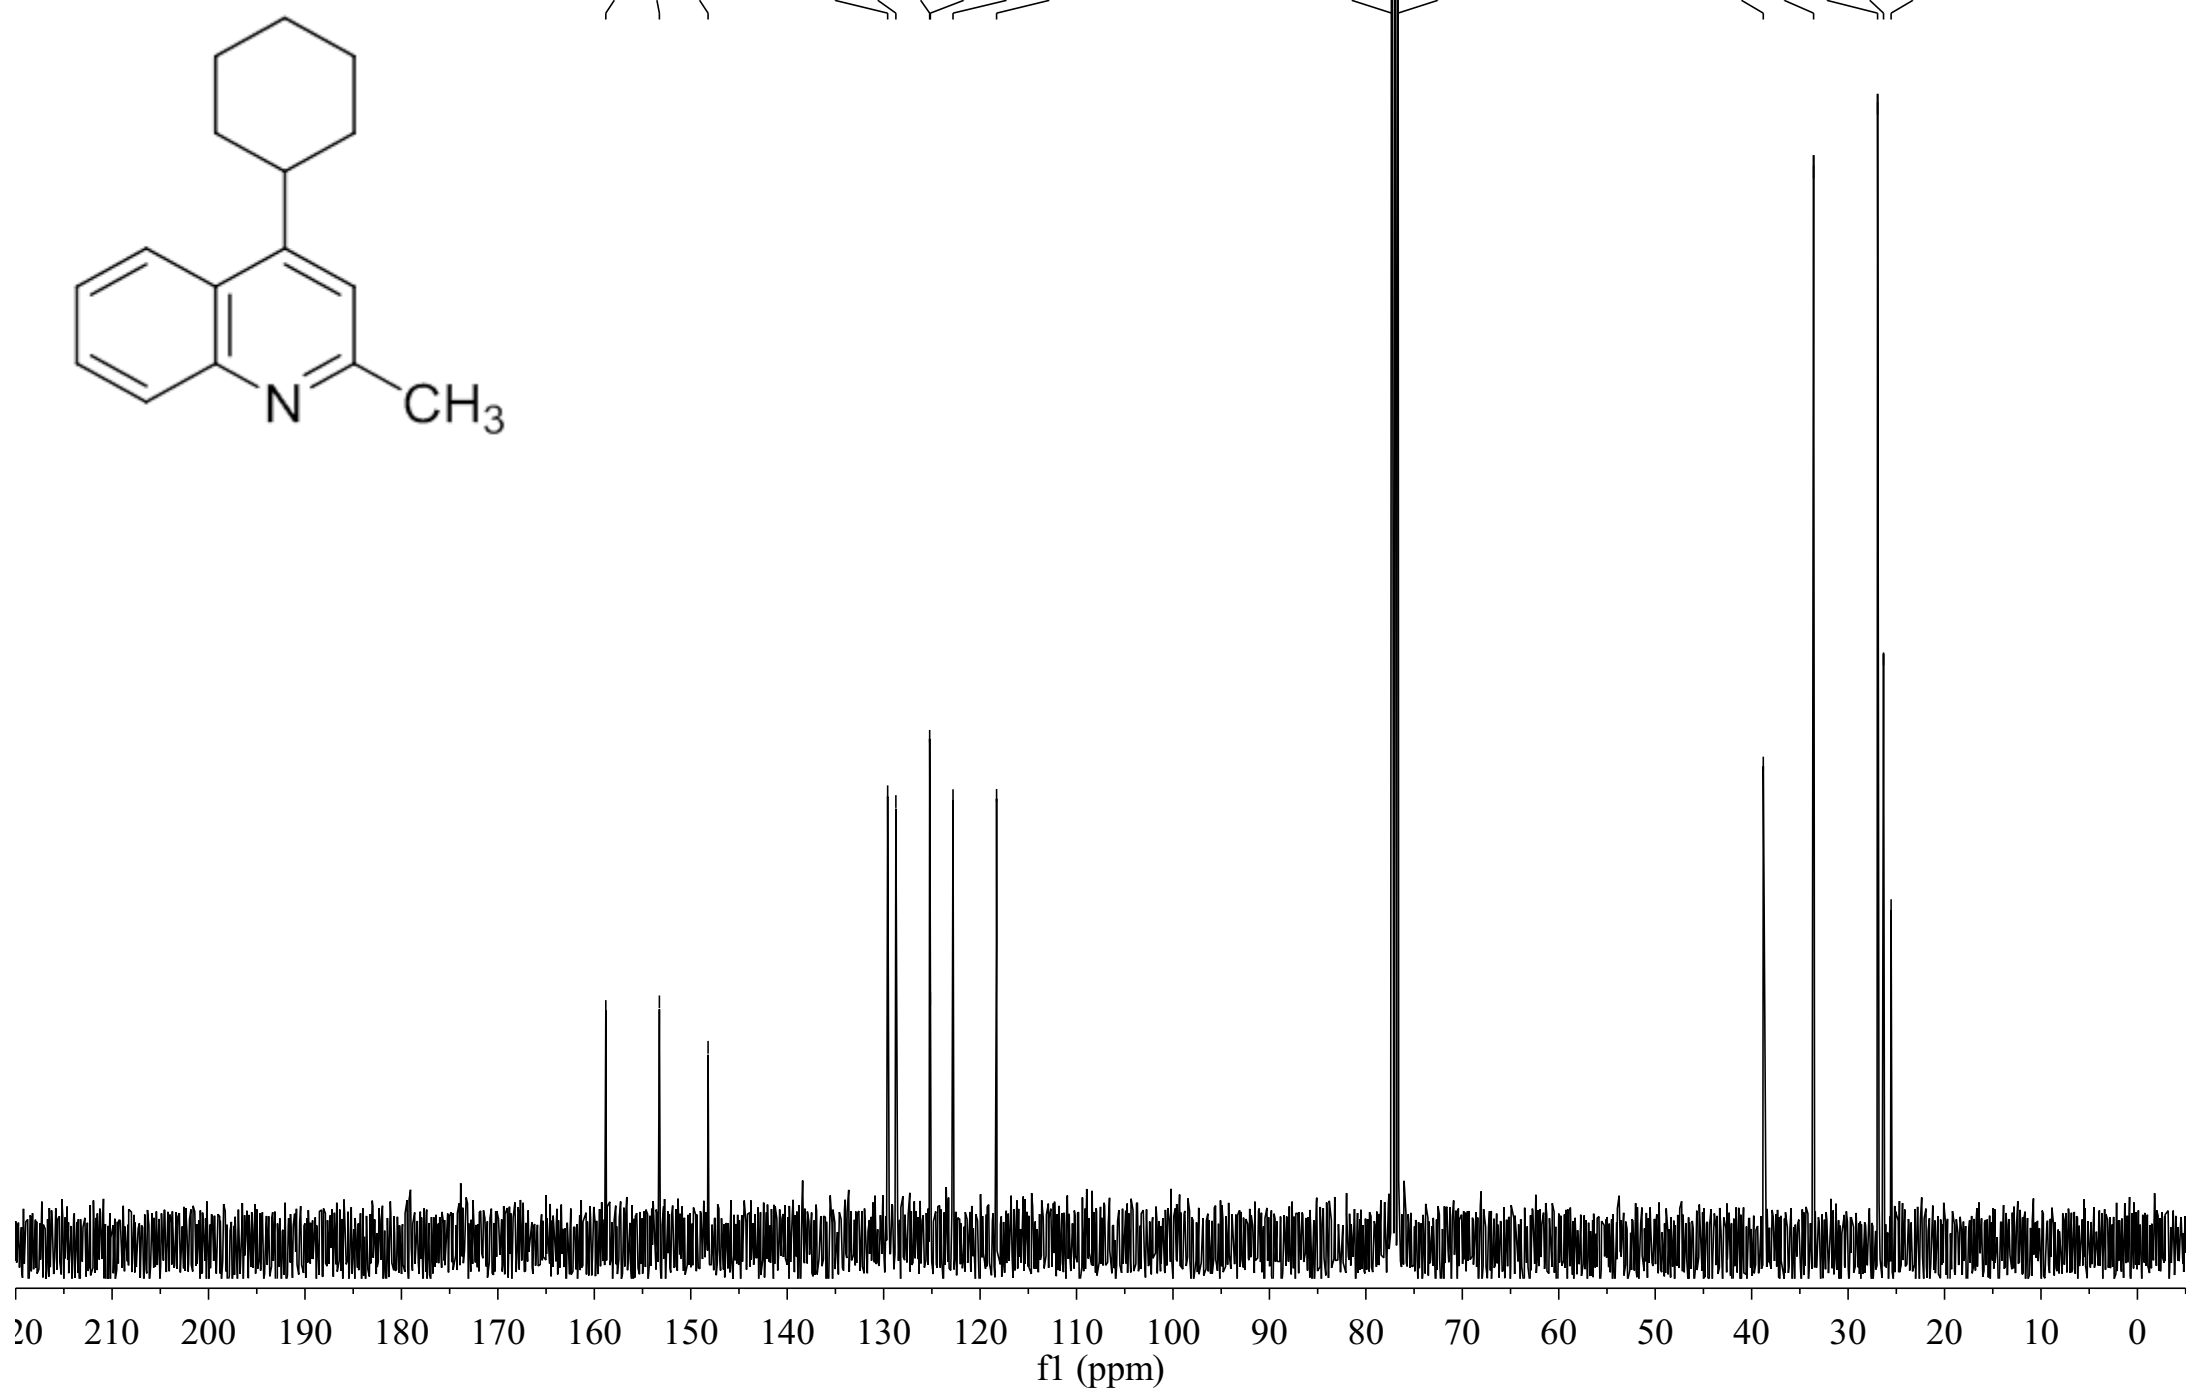



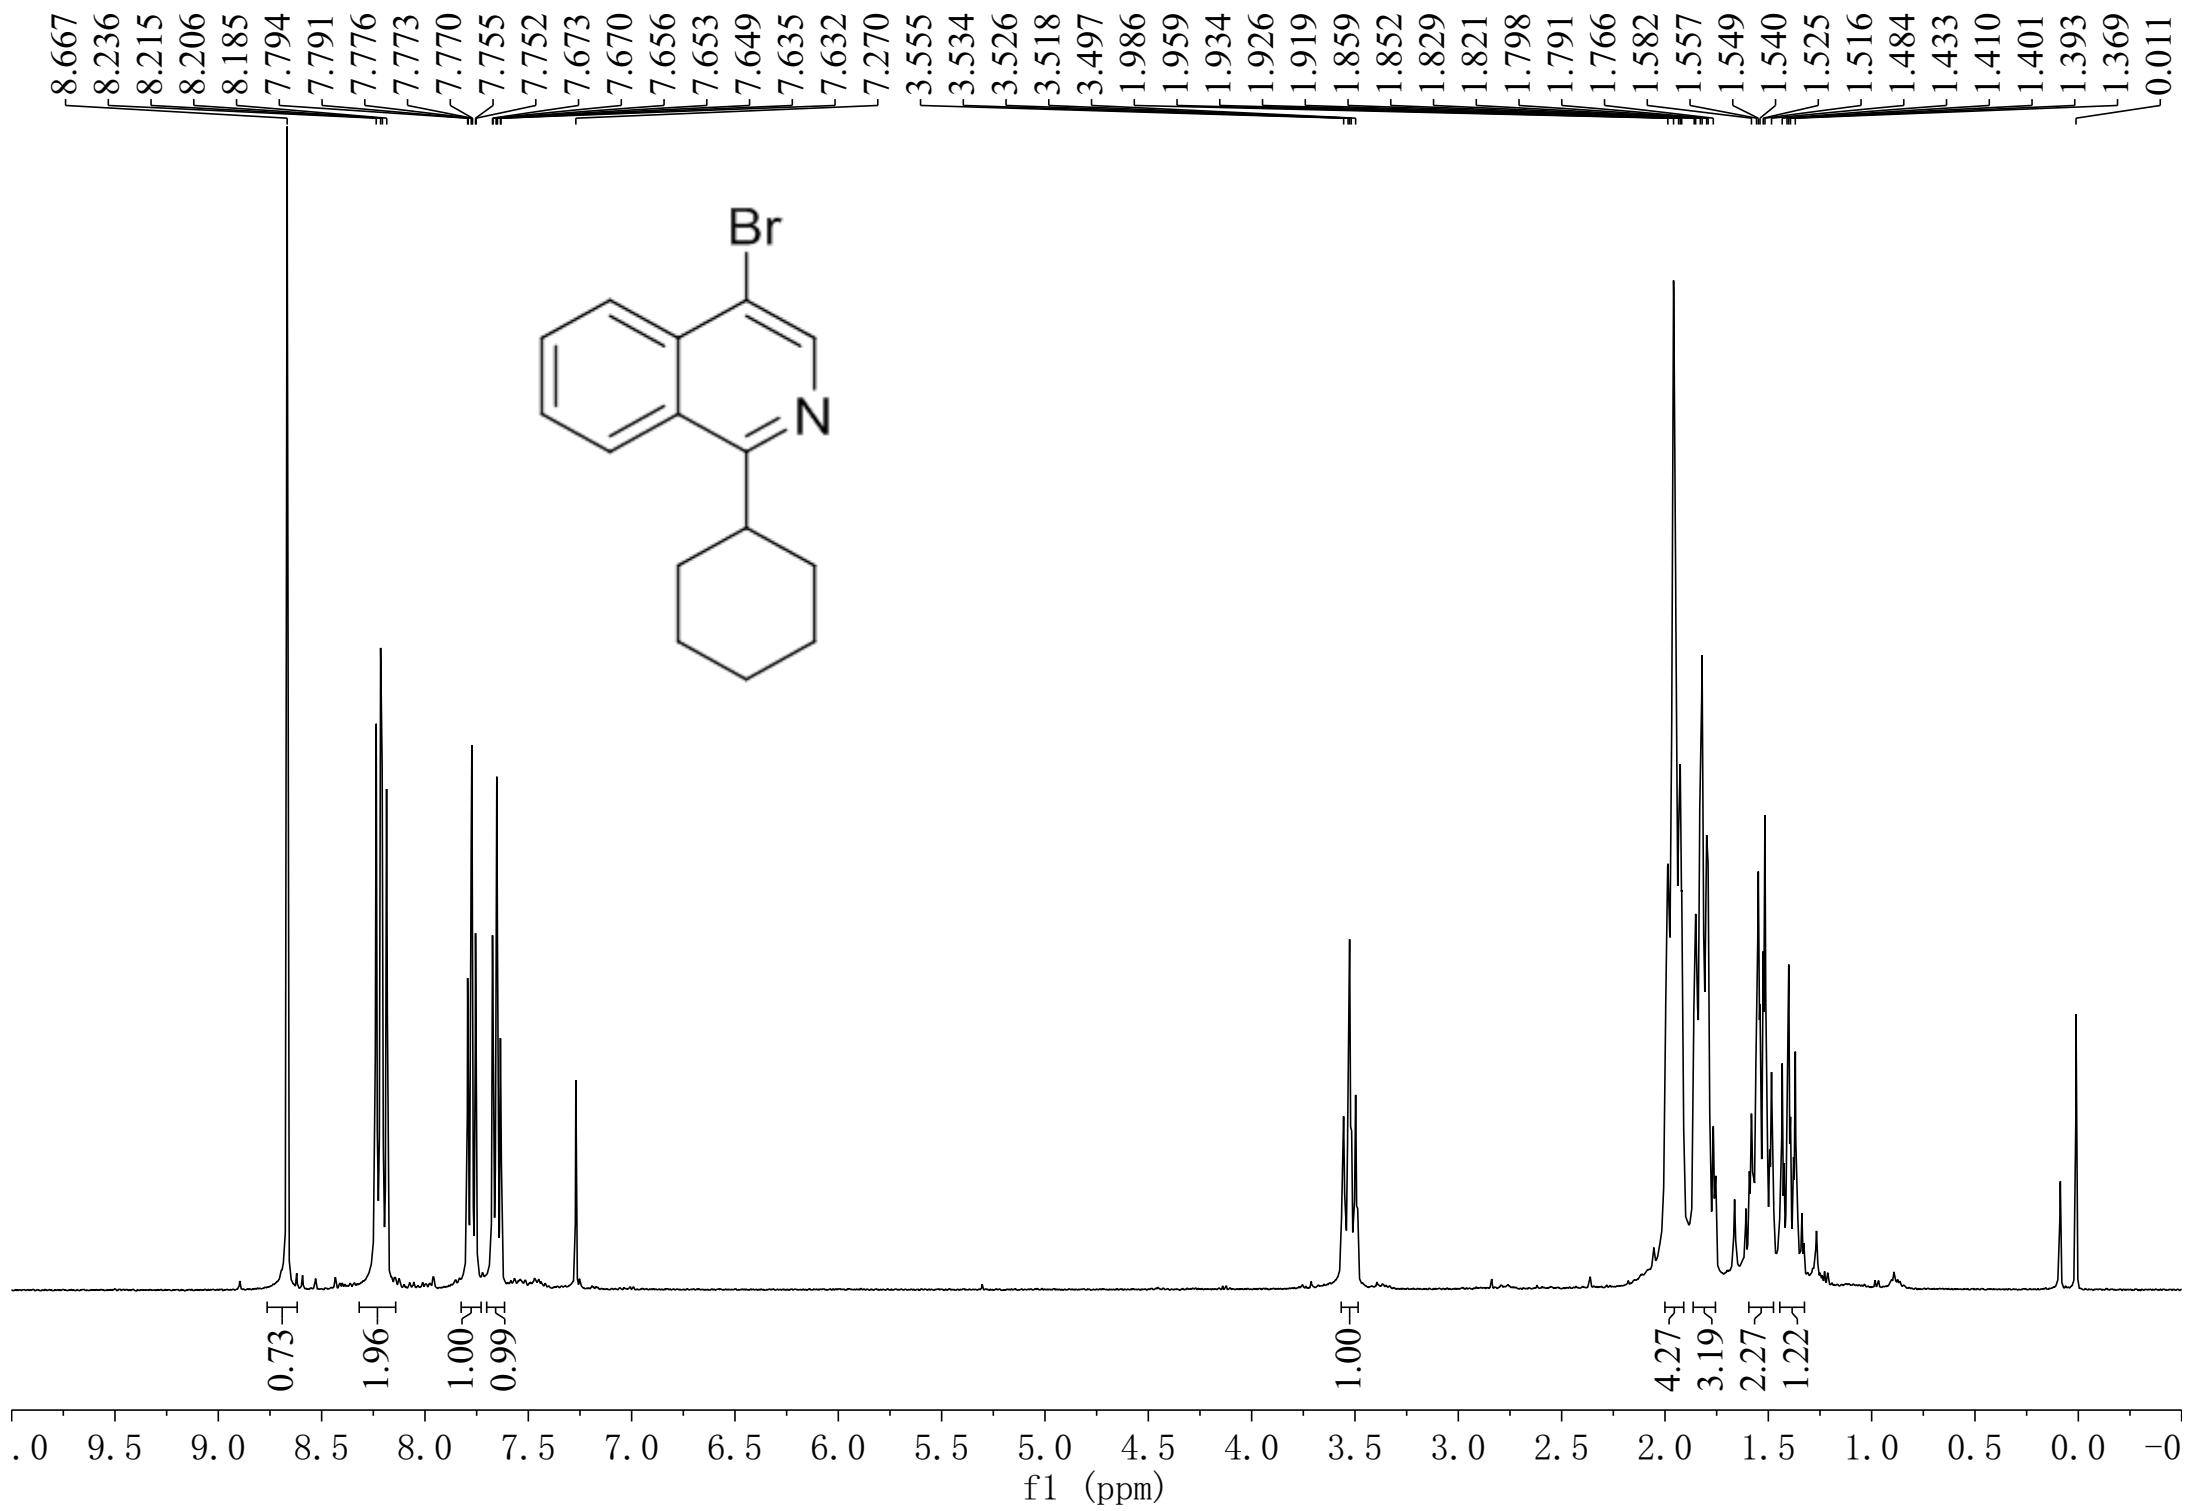

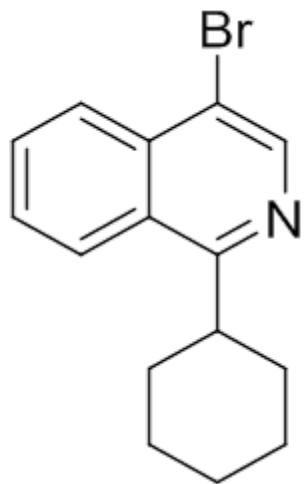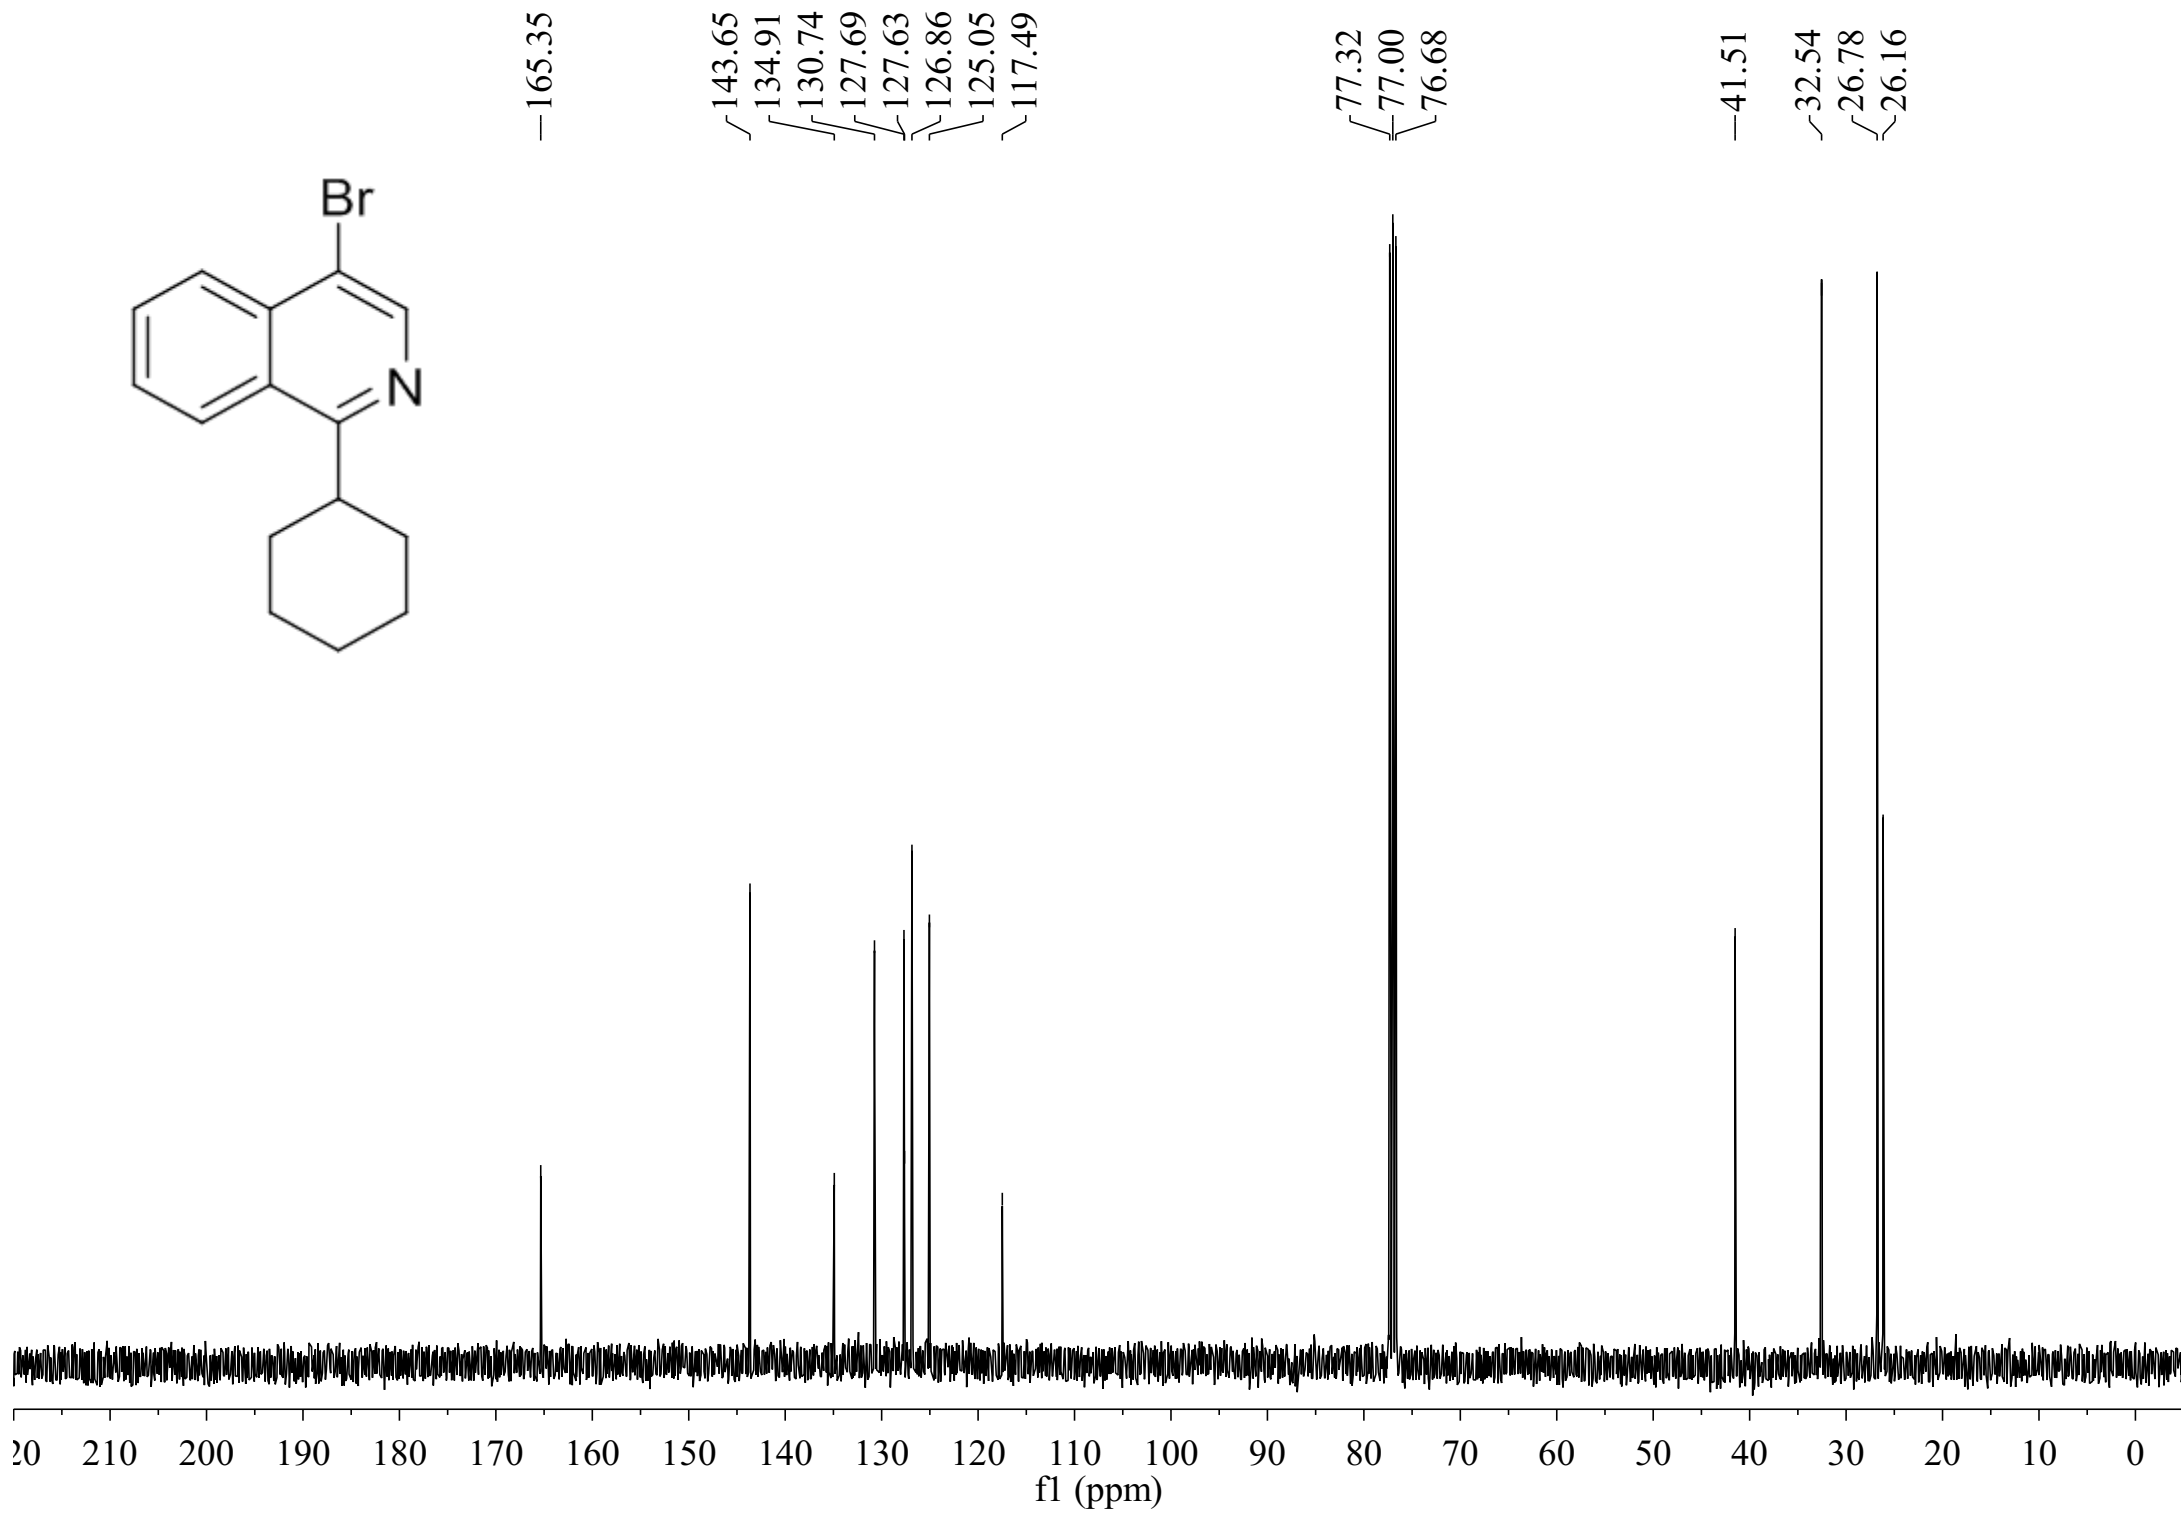

8.138  
7.270  
-2.677  
-2.656  
-2.648  
-2.640  
-2.618  
-2.496  
-2.484  
-1.933  
-1.928  
-1.925  
-1.900  
-1.896  
-1.870  
-1.863  
-1.855  
-1.839  
-1.831  
-1.824  
-1.763  
-1.760  
-1.756  
-1.752  
-1.748  
-1.737  
-1.733  
-1.729  
-1.725  
-1.721  
-1.717  
-1.535  
-1.527  
-1.504  
-1.497  
-1.472  
-1.468  
-1.445  
-1.422  
-1.414  
-1.407  
-1.390  
-1.382  
-1.375  
-1.351  
-1.323  
-1.292  
-1.284  
-1.261  
-0.010

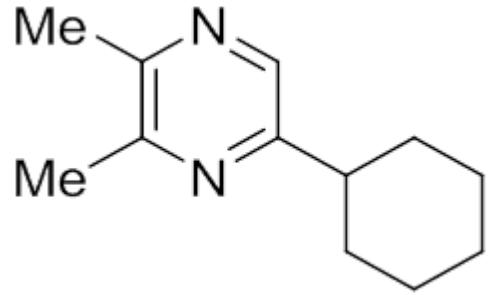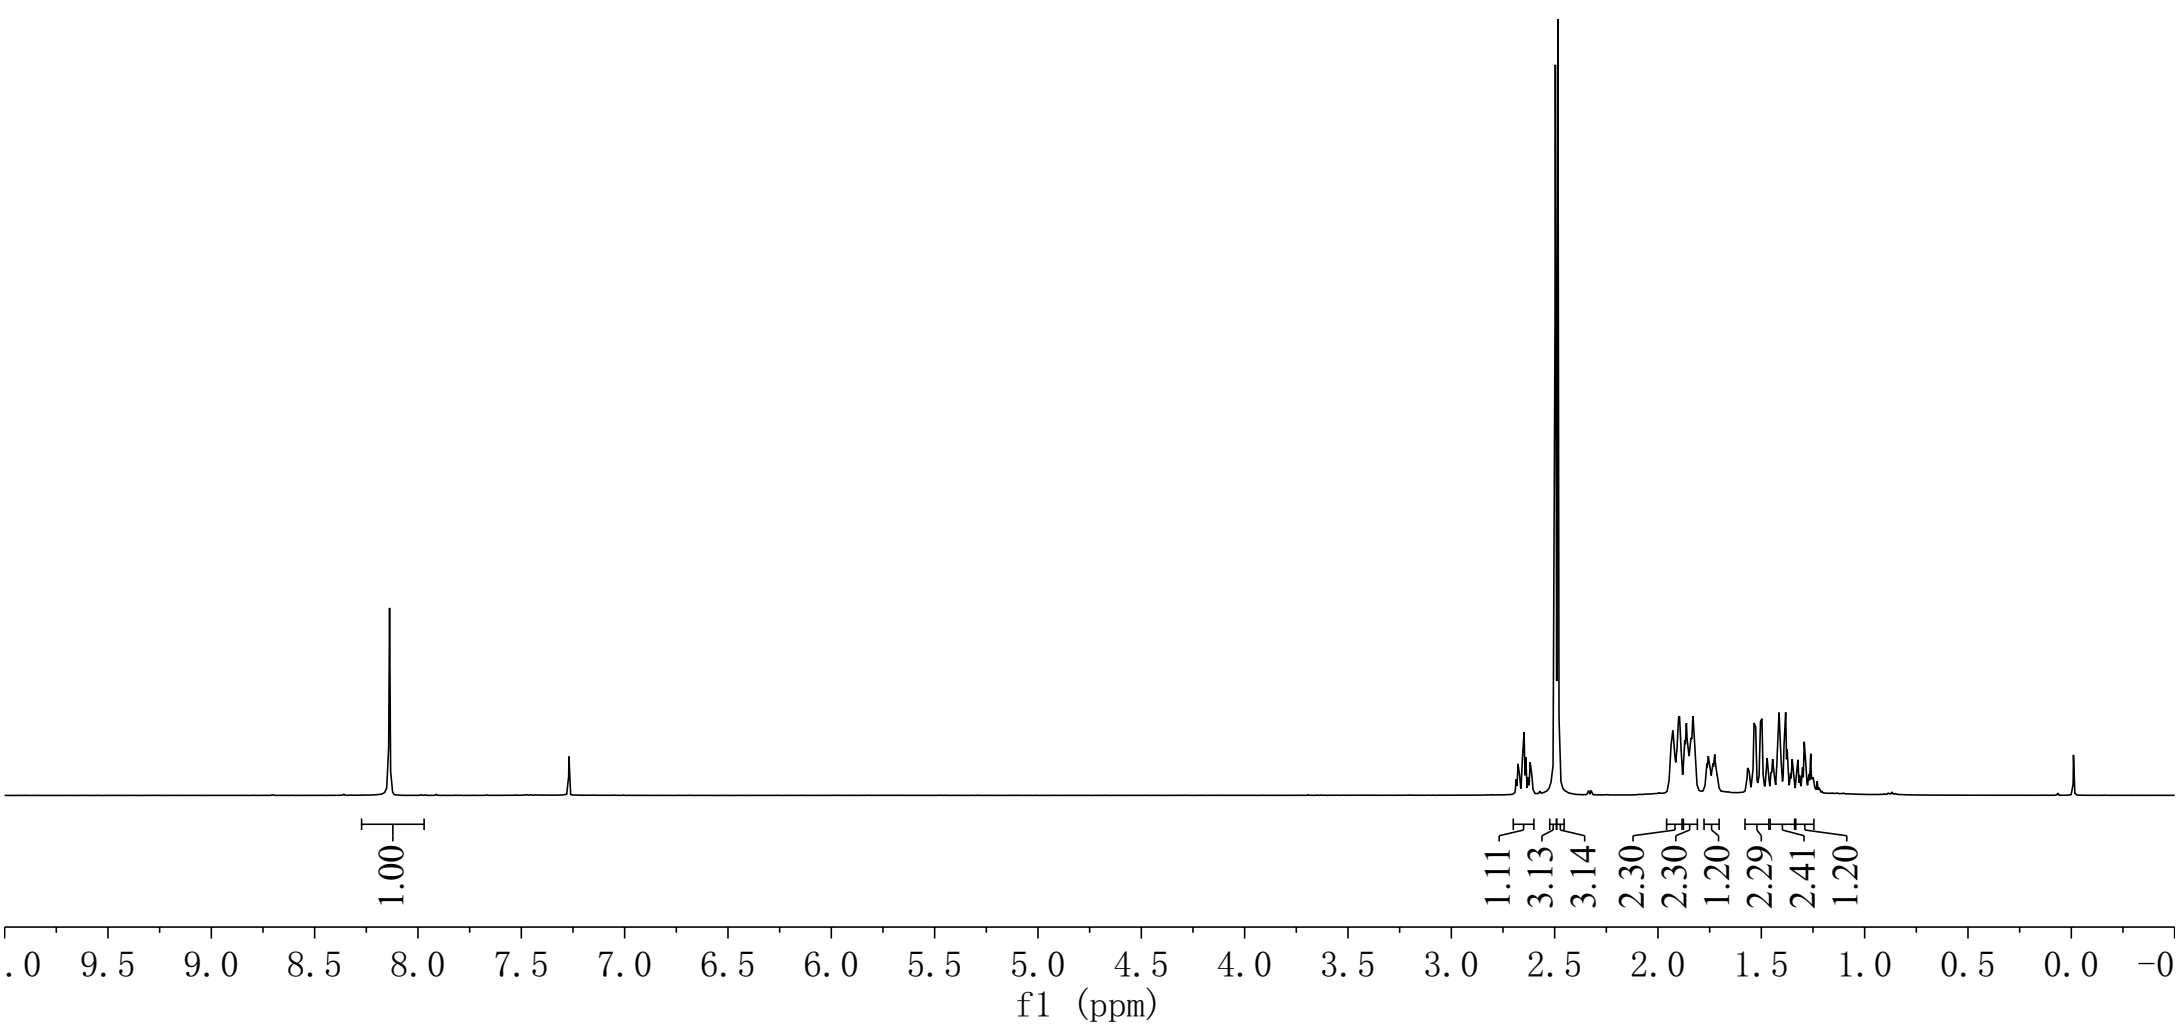

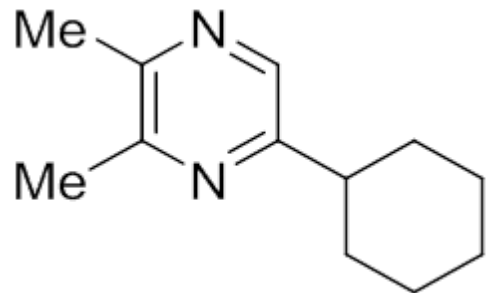

157.84  
151.09  
149.23  
139.01

77.32  
77.00  
76.68

43.80  
32.61  
26.43  
25.89  
22.03  
21.56

20 210 200 190 180 170 160 150 140 130 120 110 100 90 80 70 60 50 40 30 20 10 0

fl (ppm)

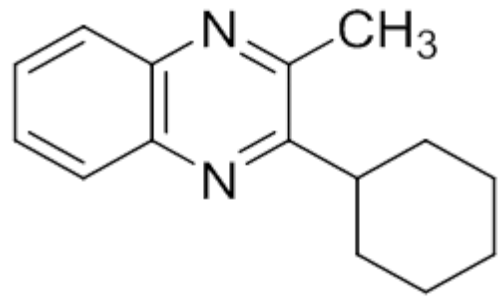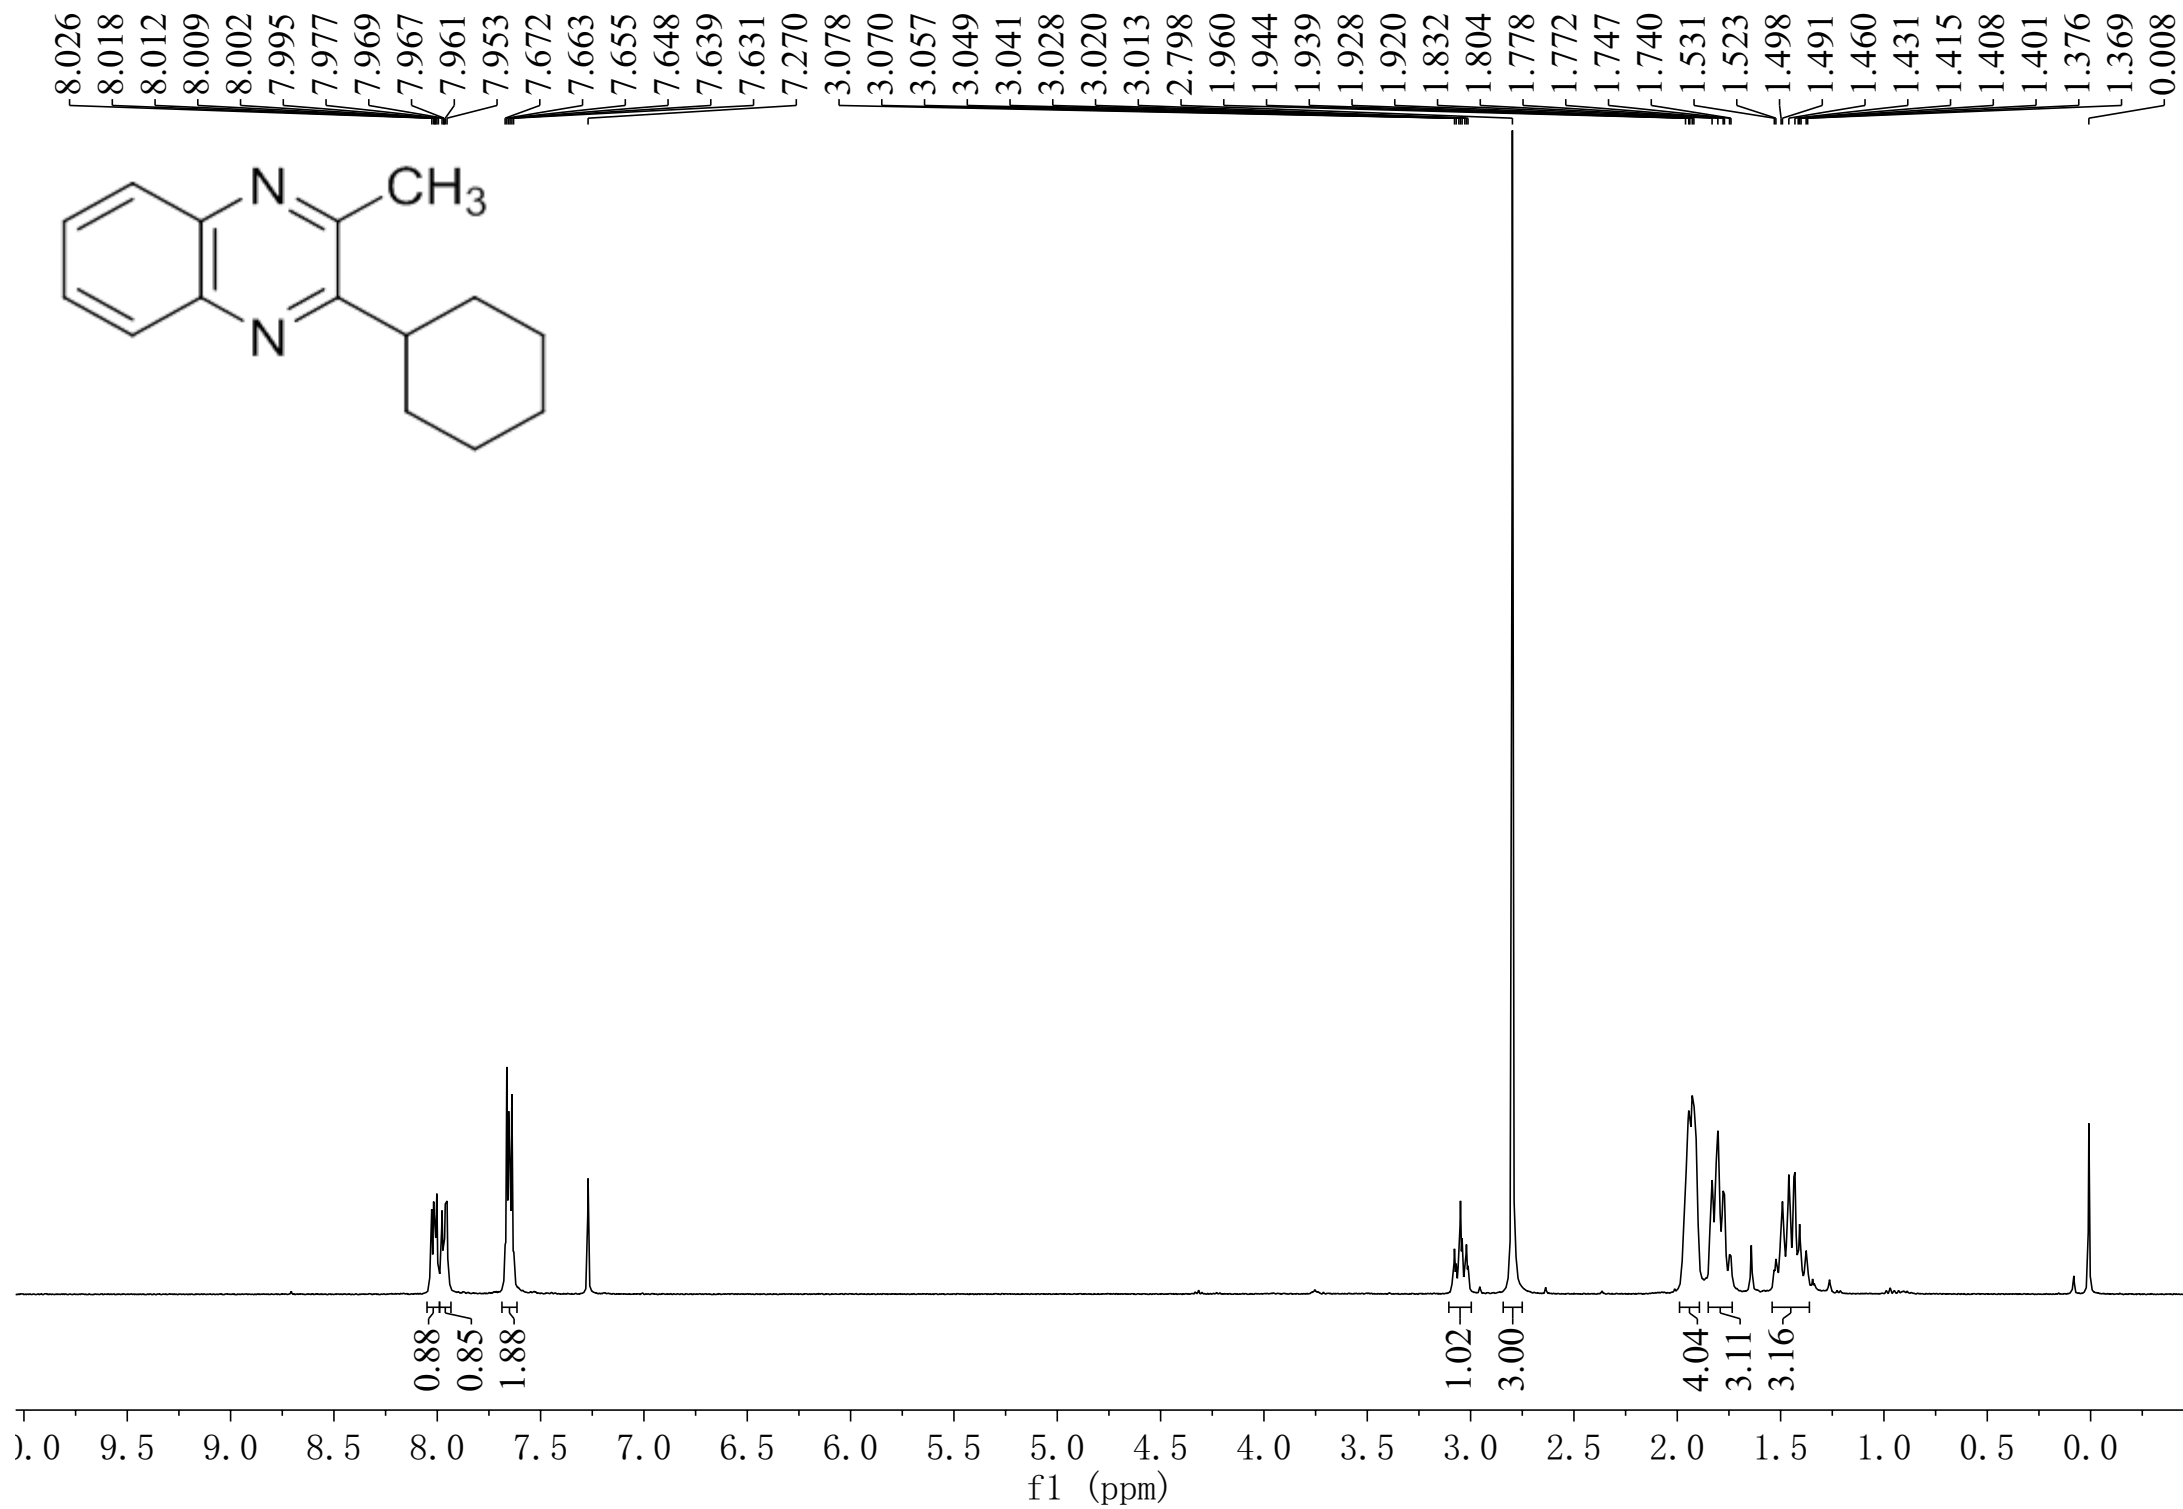

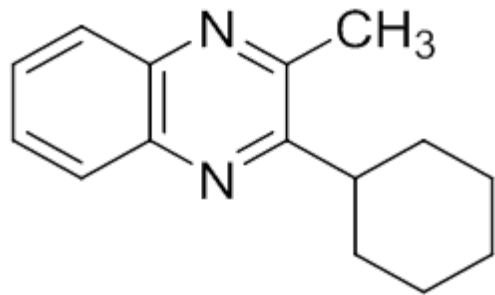

160.32  
152.63  
141.36  
140.58  
128.73  
128.62  
128.49  
128.18

77.32  
77.00  
76.68

42.59  
31.57  
26.61  
25.97  
22.69

20 210 200 190 180 170 160 150 140 130 120 110 100 90 80 70 60 50 40 30 20 10 0

fl (ppm)

8.126  
8.105  
7.974  
7.952  
7.812  
7.808  
7.794  
7.791  
7.773  
7.770  
7.544  
7.542  
7.527  
7.524  
7.521  
7.506  
7.503  
7.270  
3.511  
2.996  
2.987  
2.979  
2.958  
2.078  
2.050  
1.956  
1.929  
1.895  
1.869  
1.861  
1.838  
1.808  
1.800  
1.779  
1.770  
1.540  
1.533  
1.516  
1.508  
1.501  
1.493  
1.484  
1.461  
1.453  
1.434  
1.422  
1.383  
1.351  
1.344  
0.010

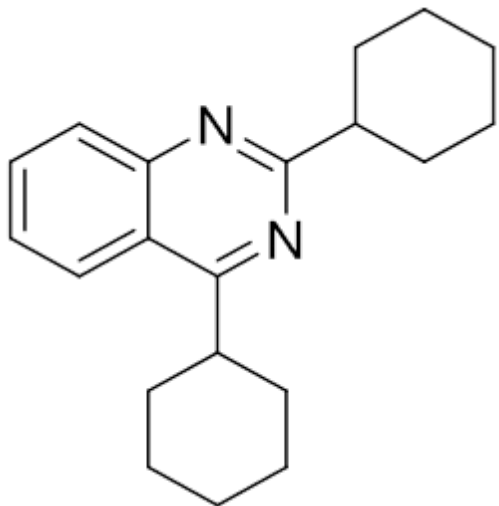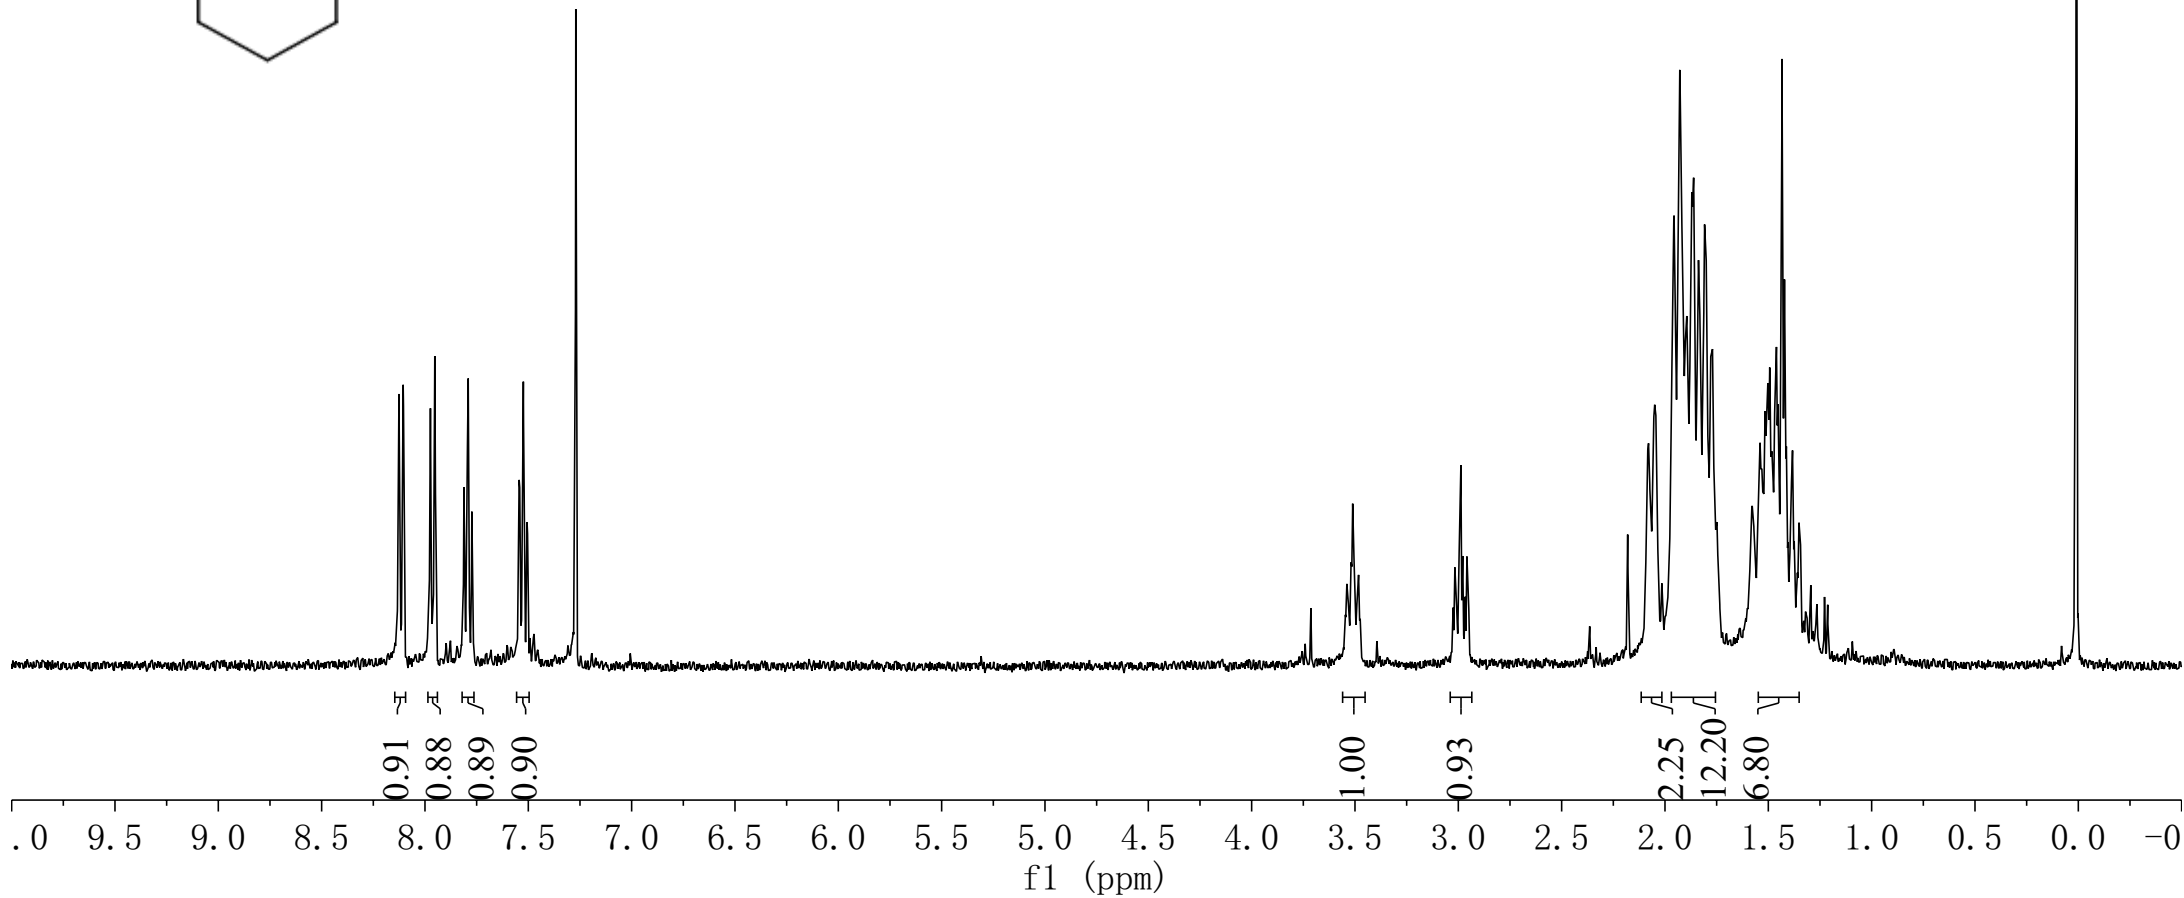

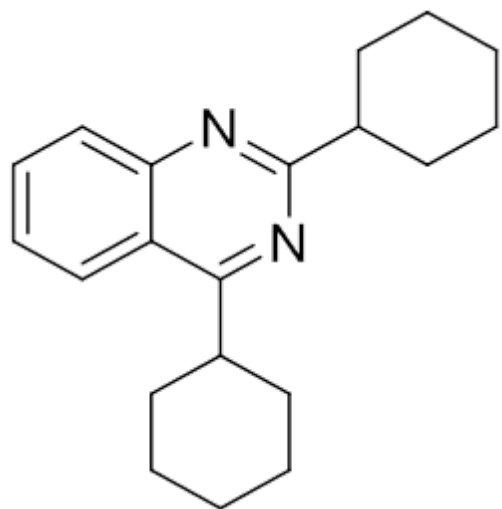

-174.43

-170.15

-150.56

132.63

128.92

125.96

123.94

121.38

77.32

77.00

76.68

-47.92

-41.31

31.99

31.91

26.53

26.34

26.17

26.10

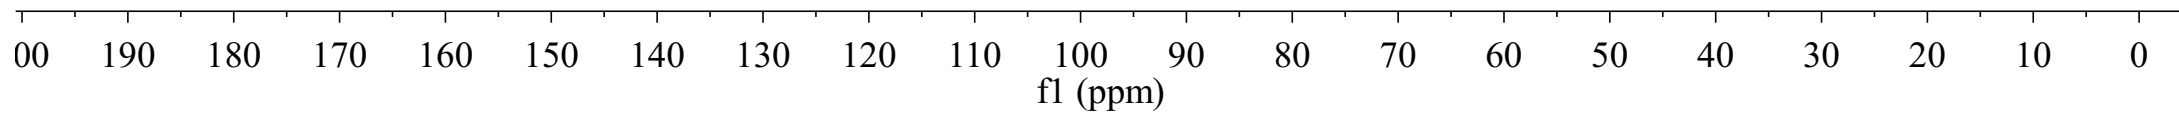



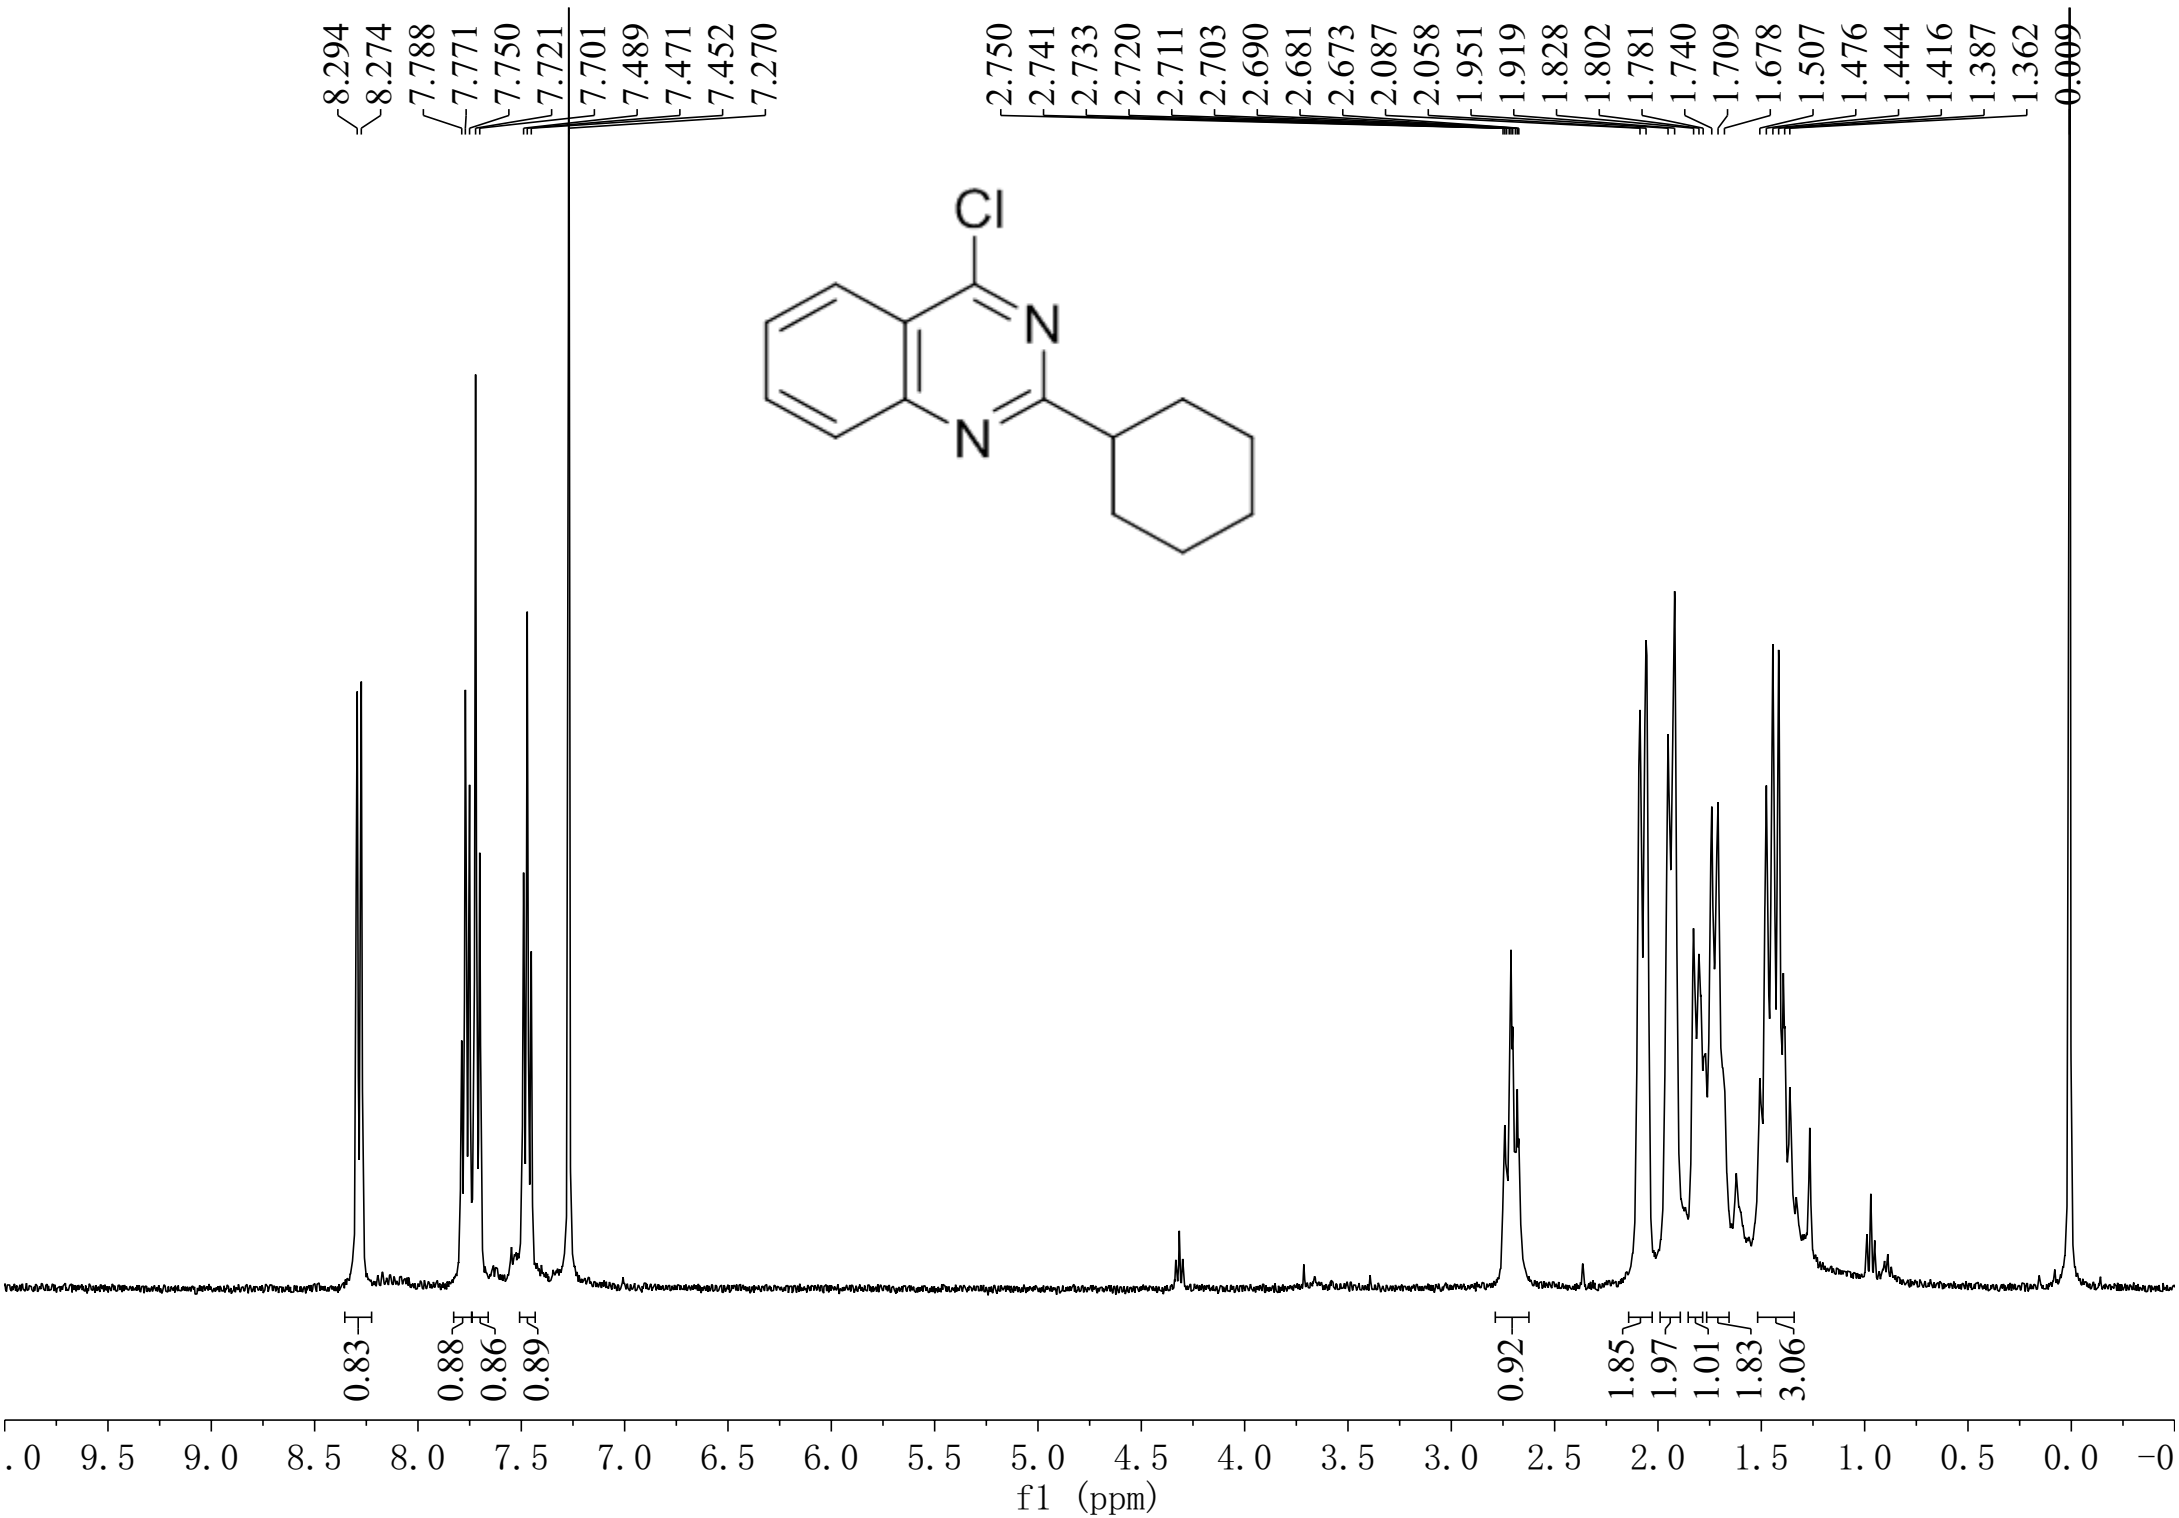

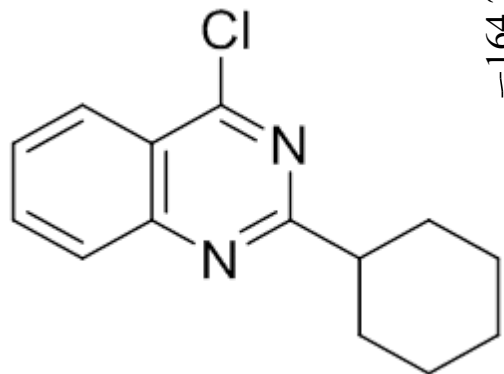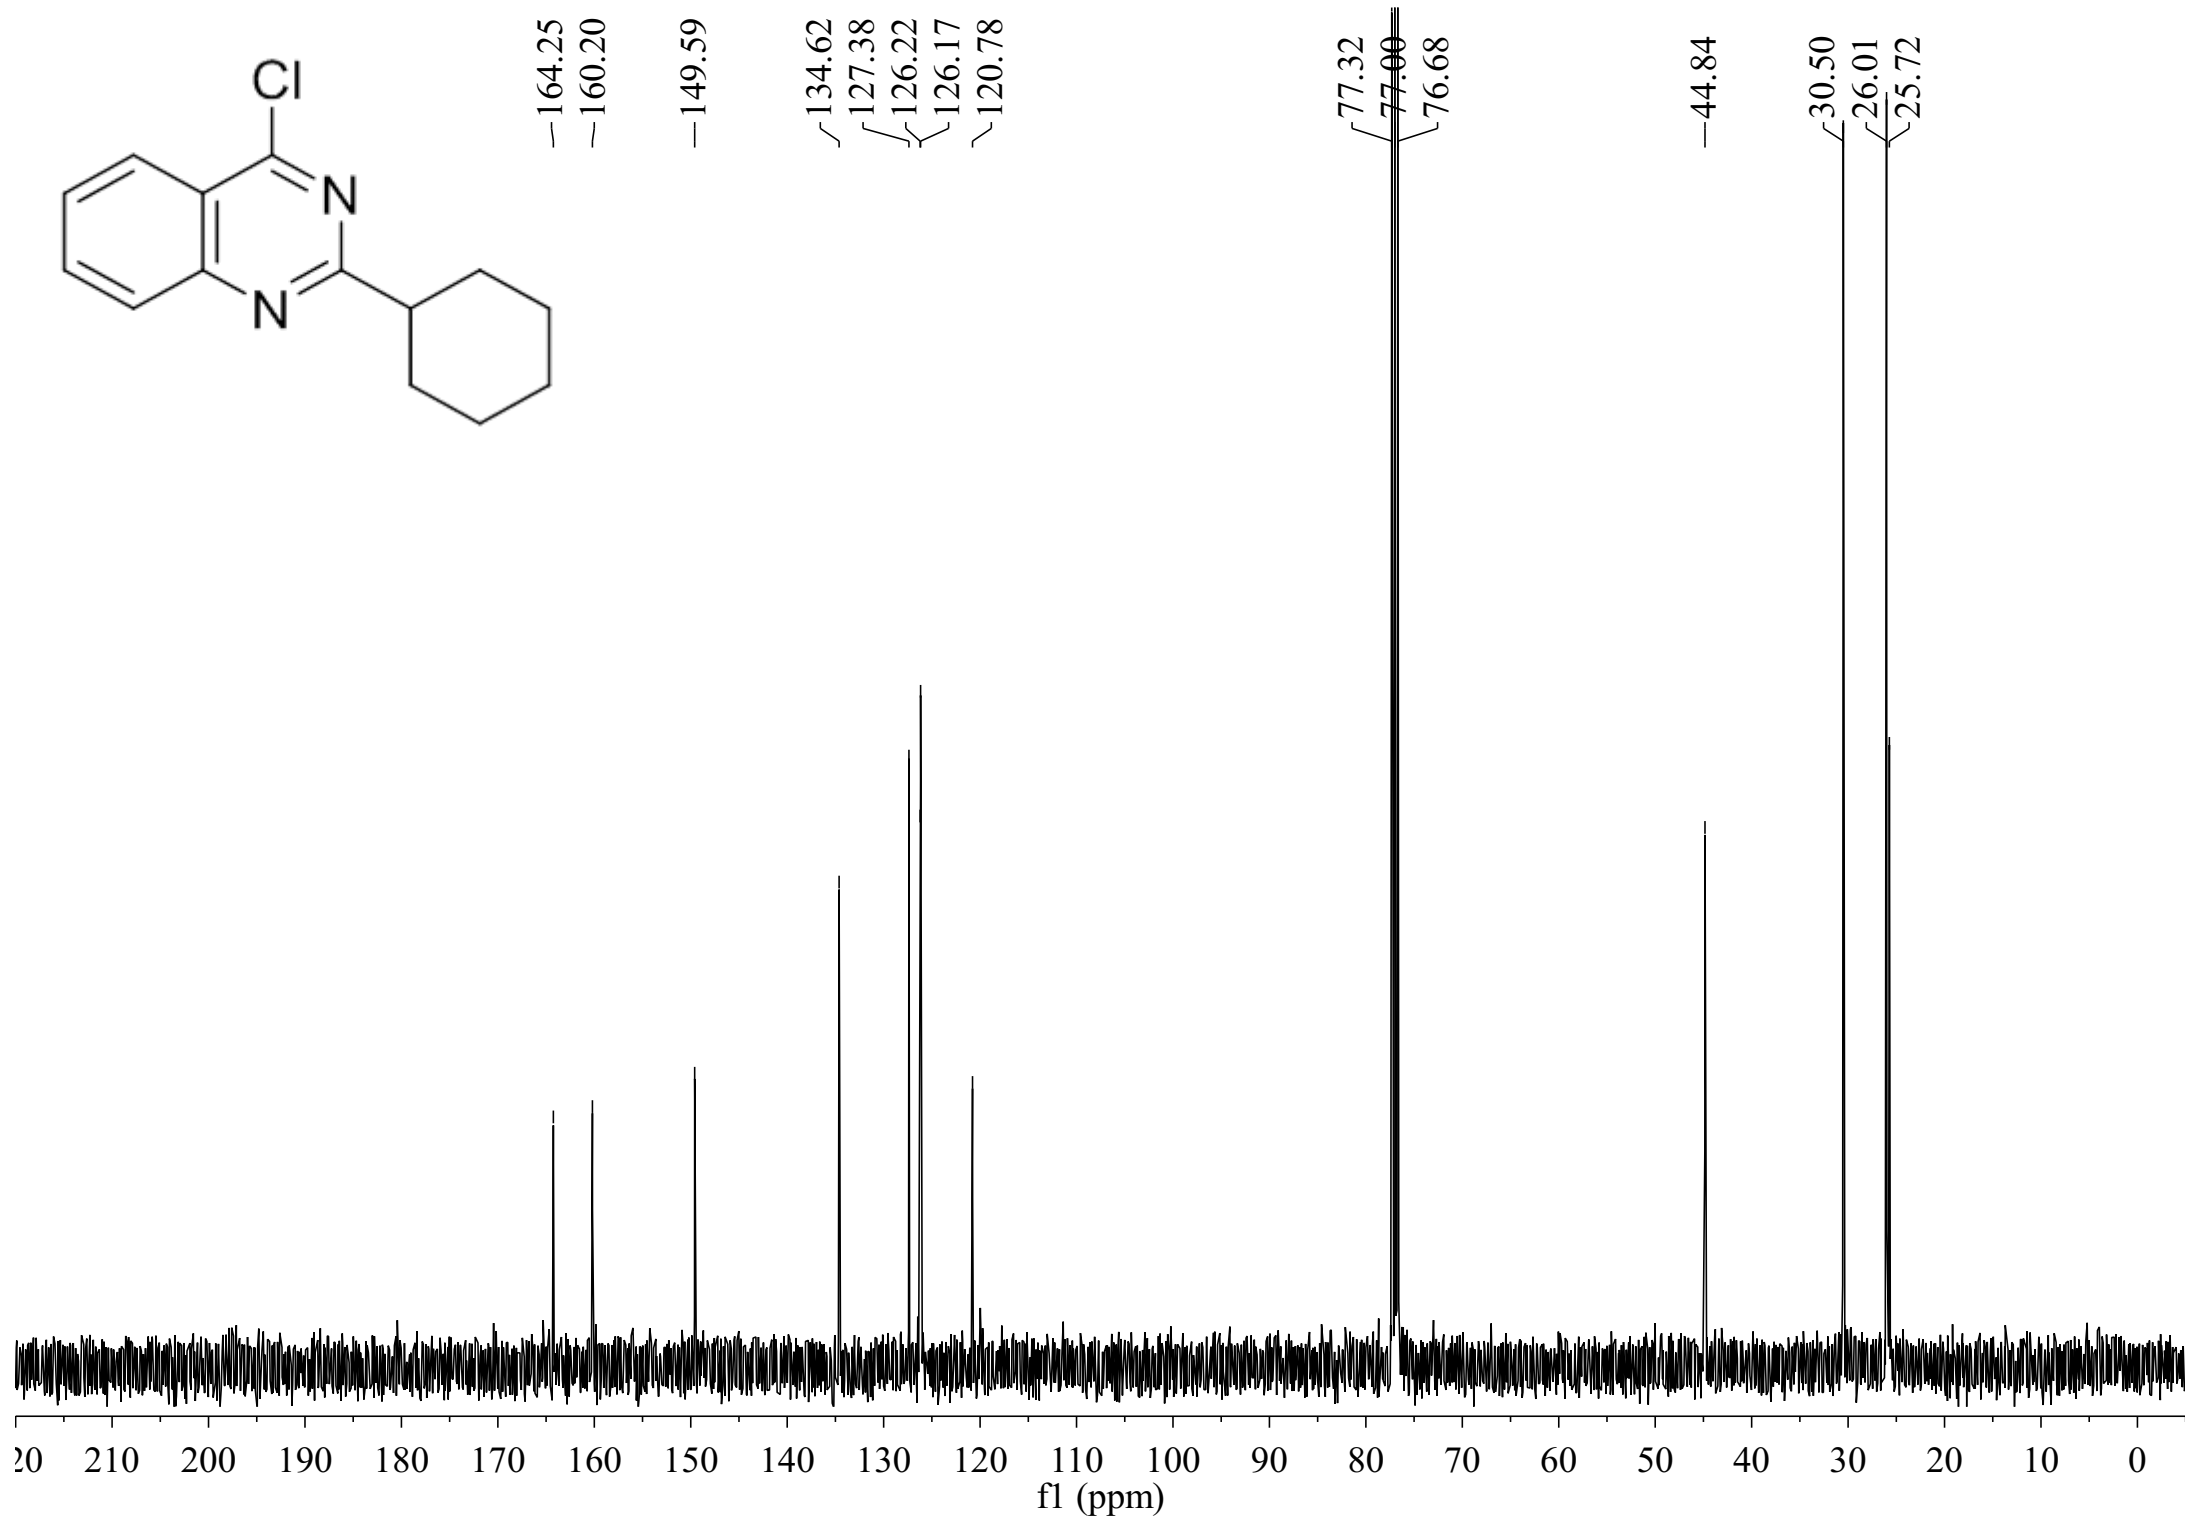

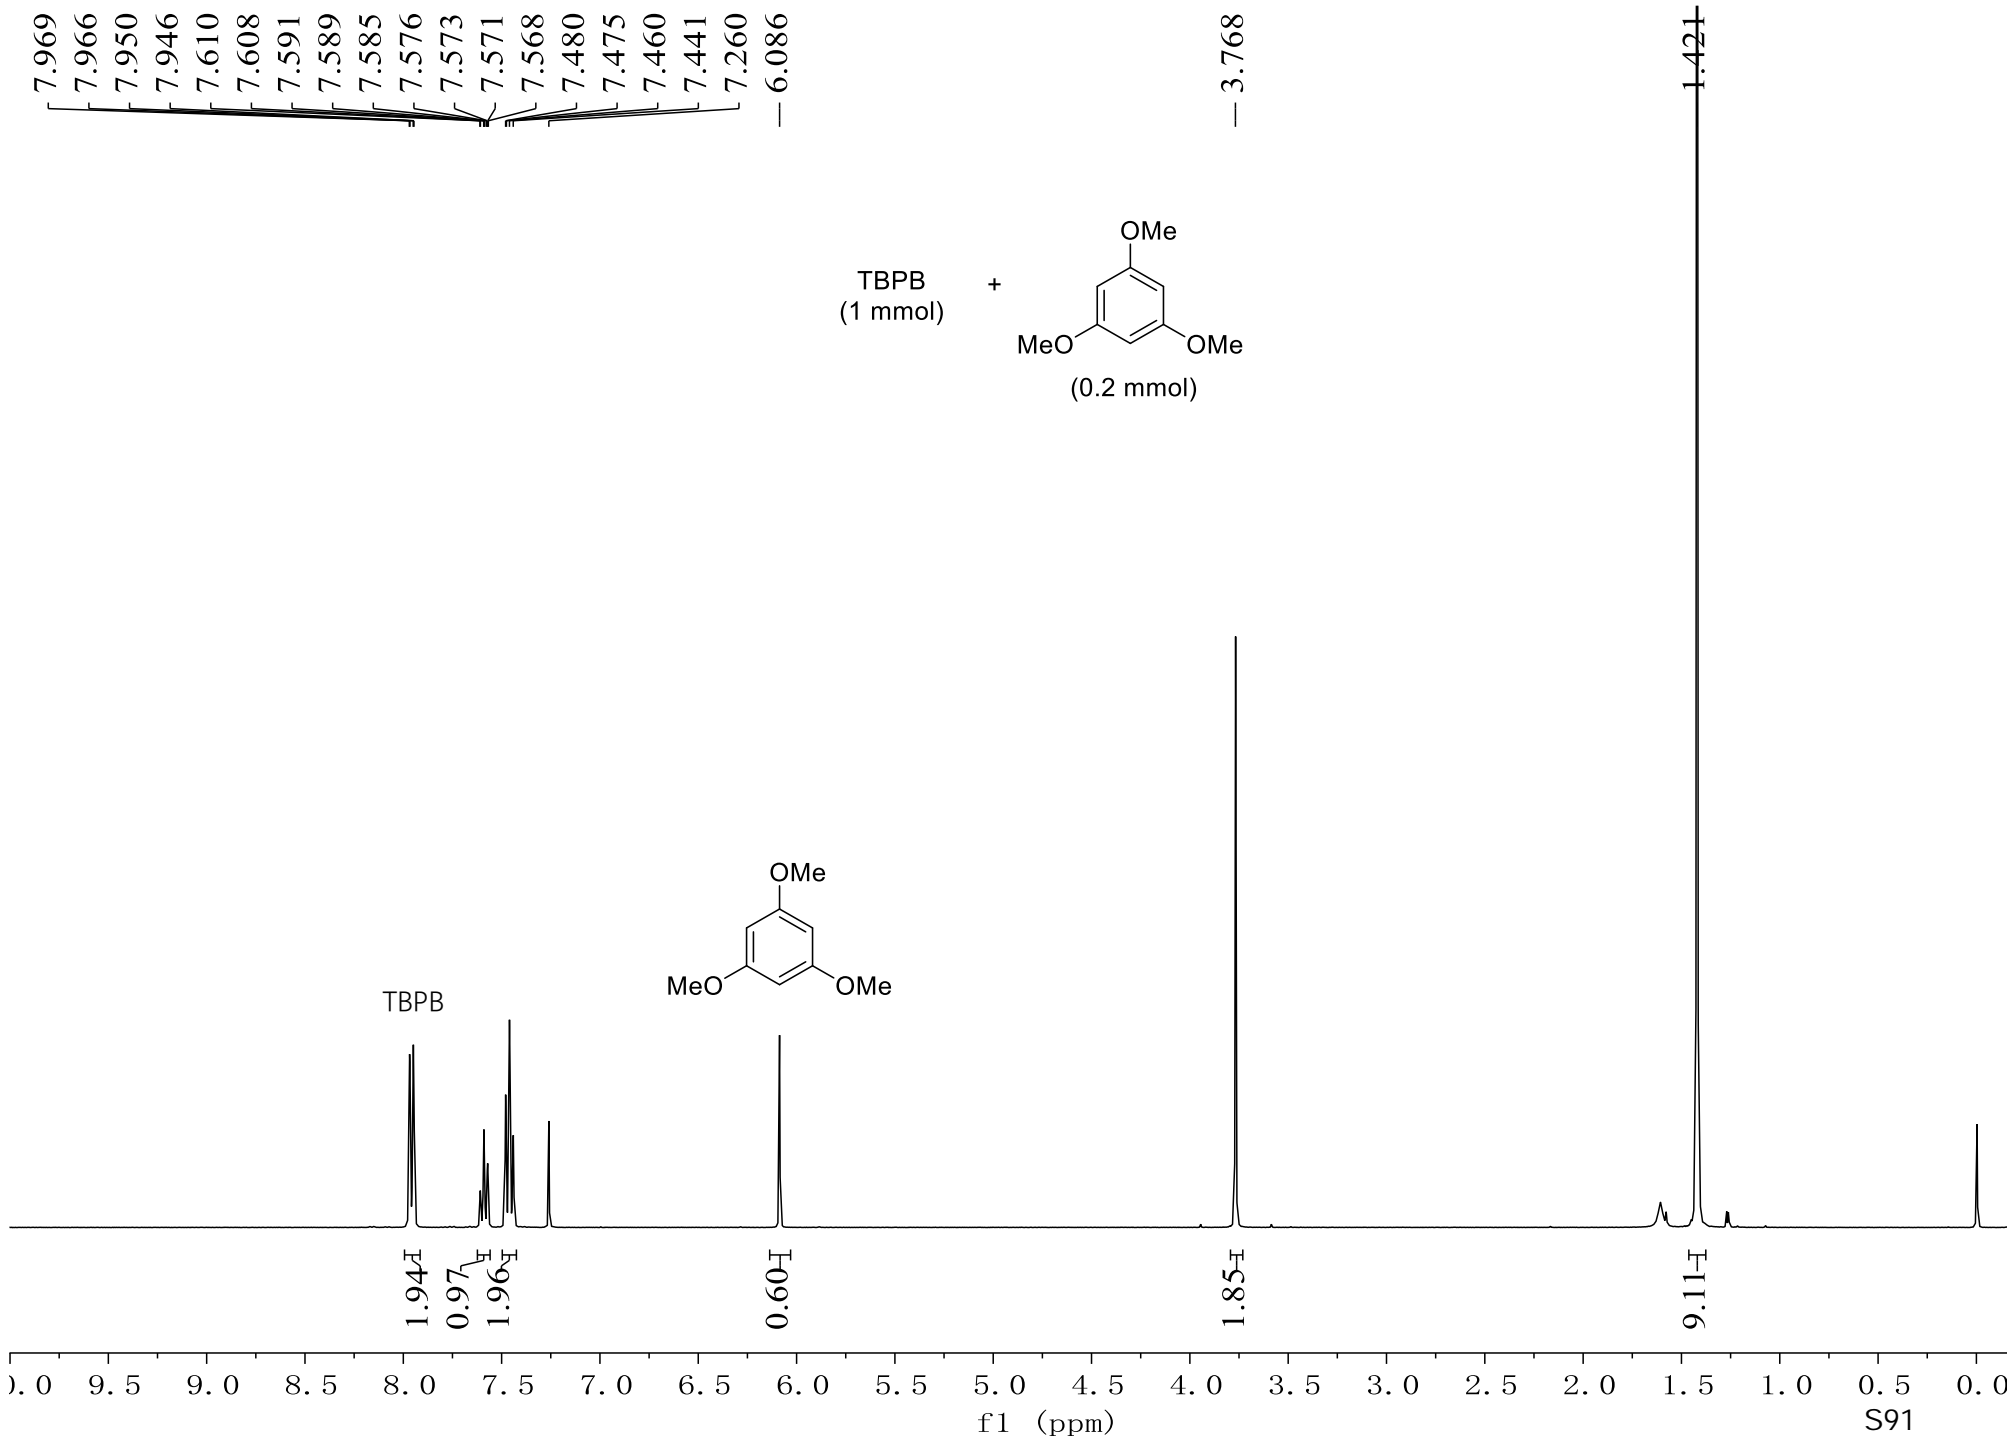

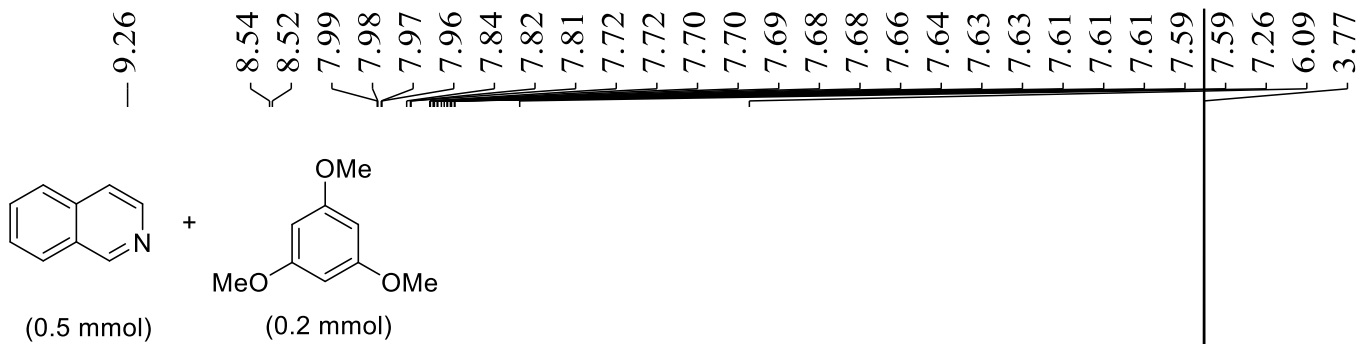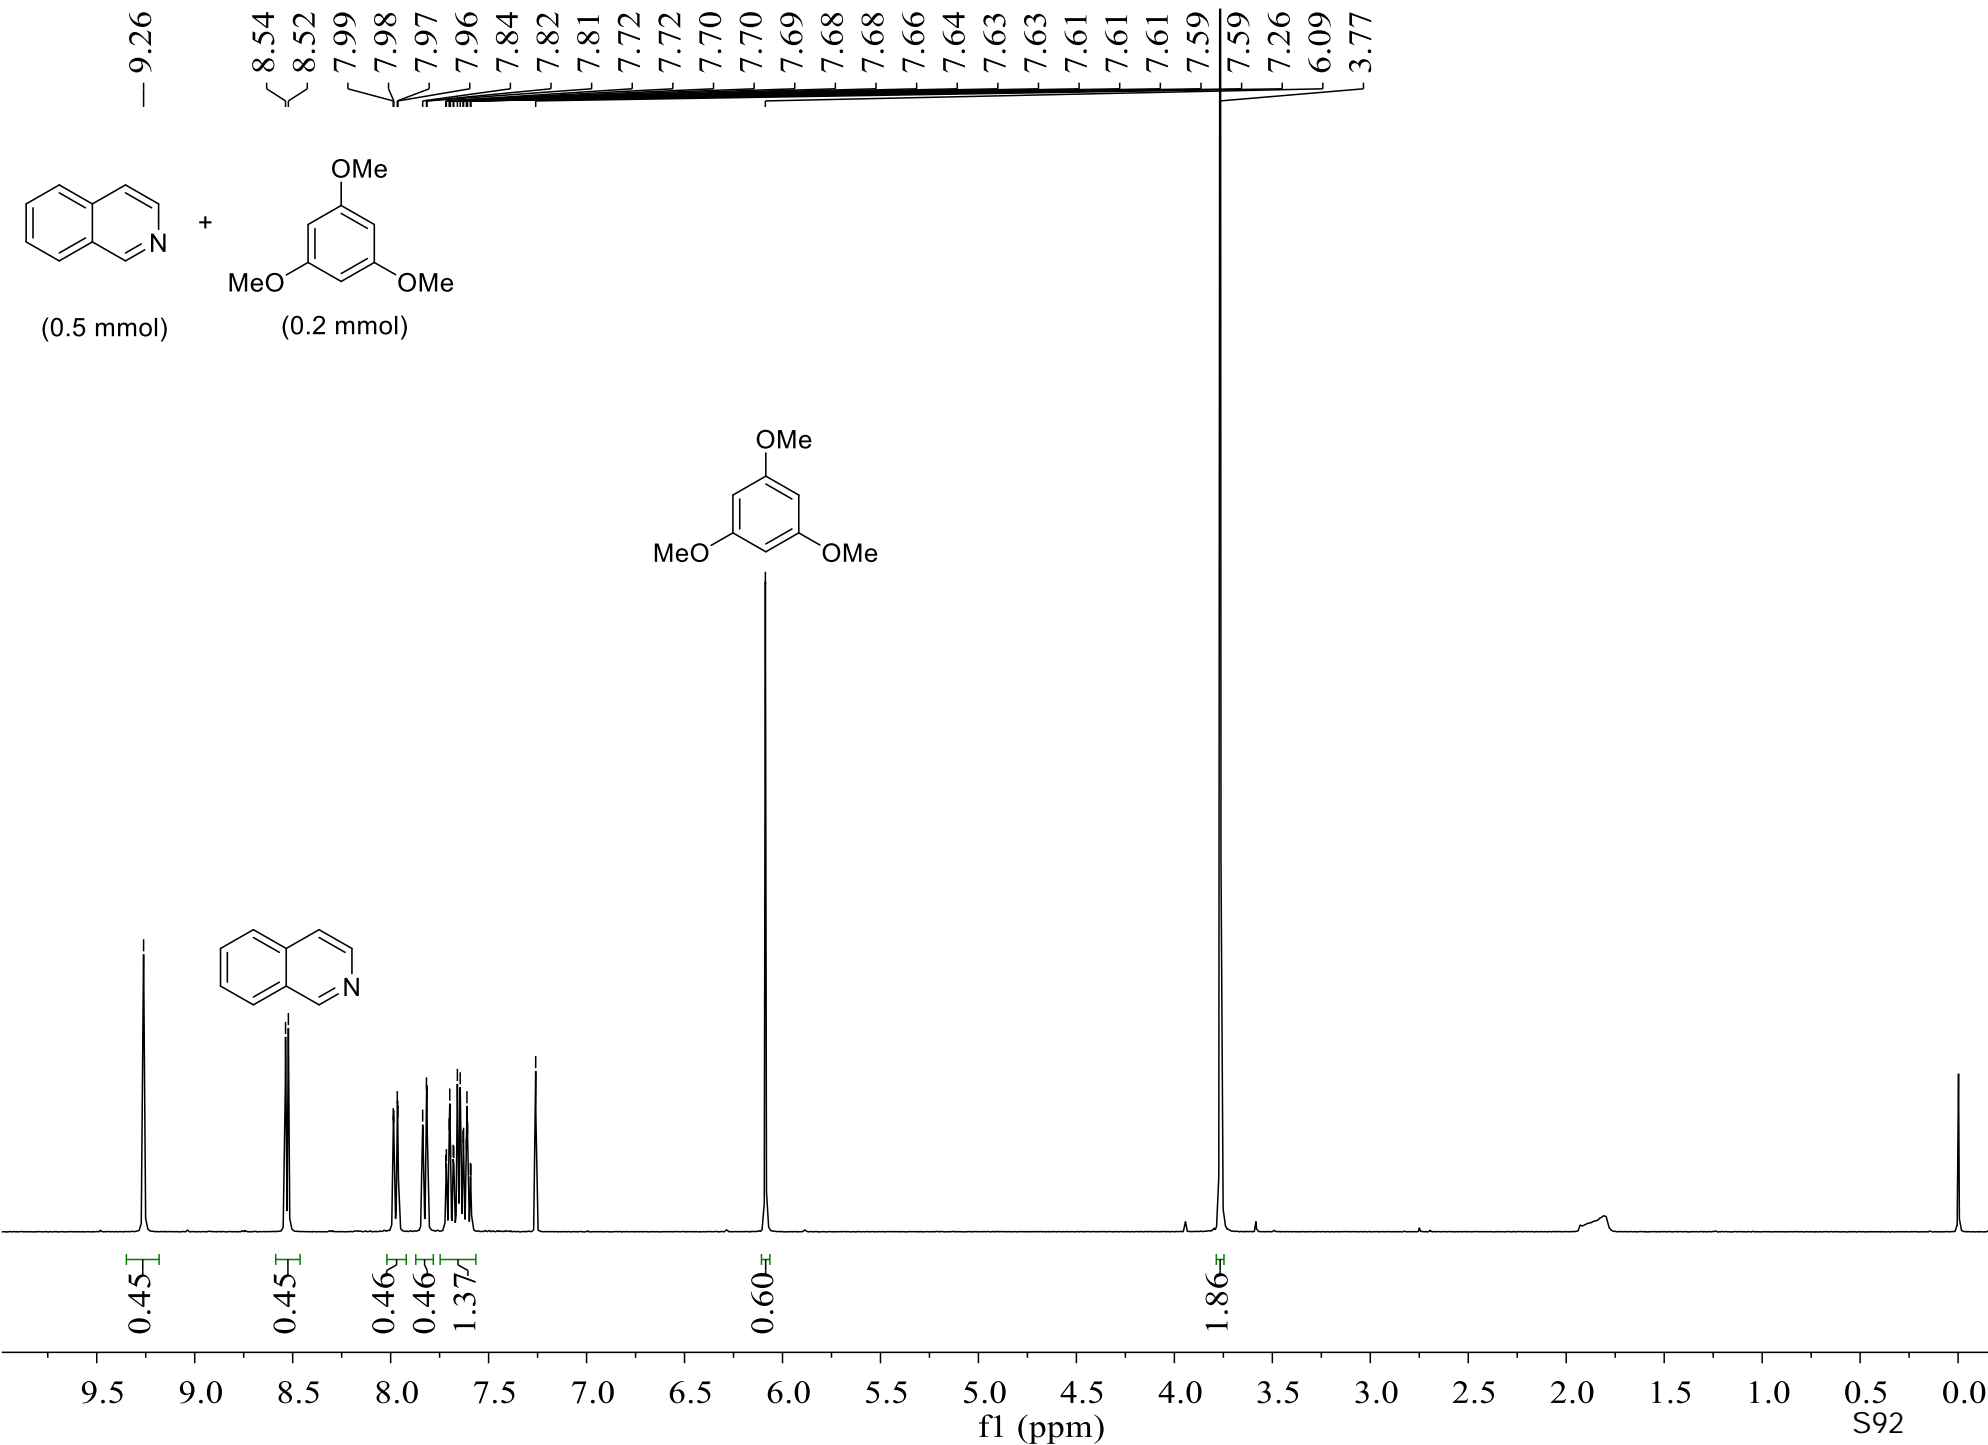

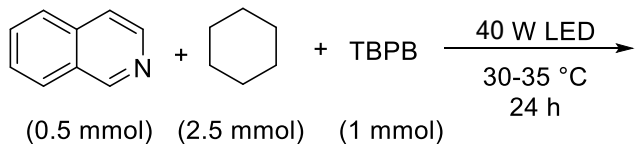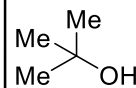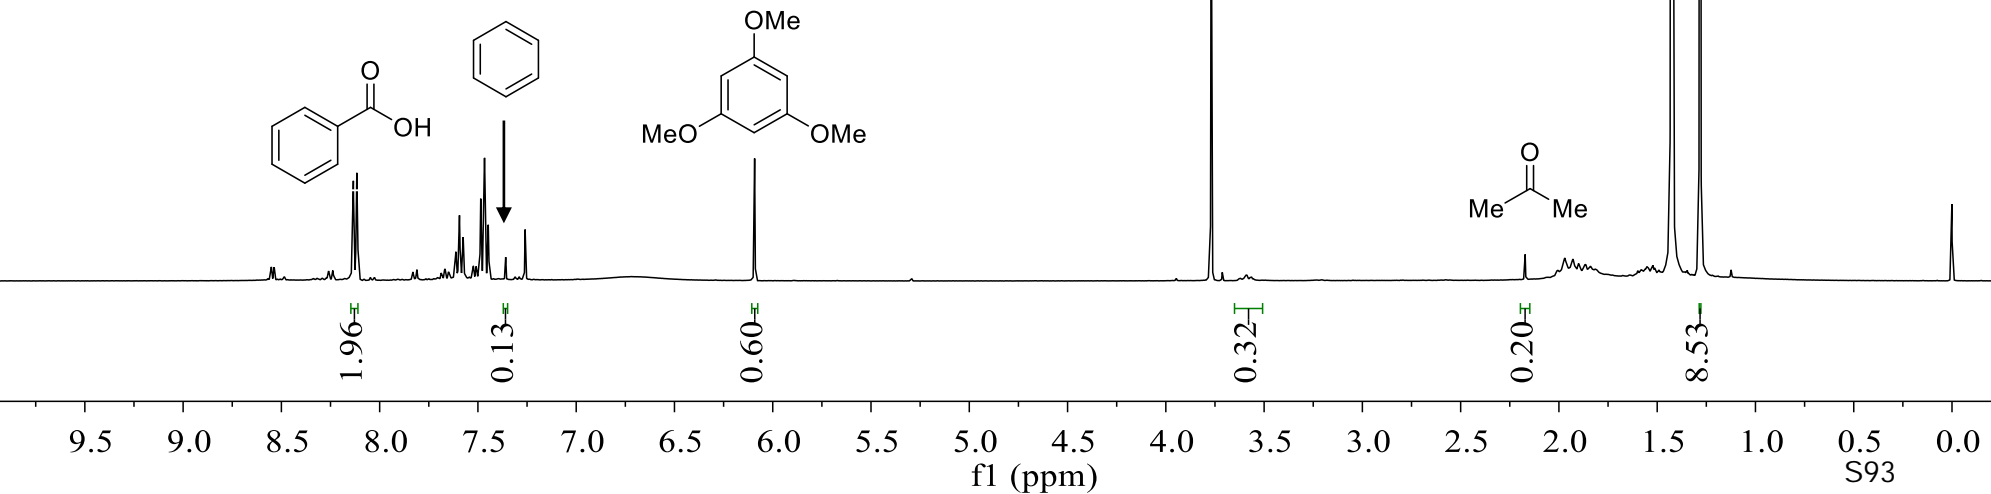

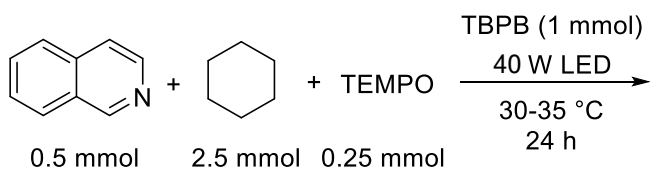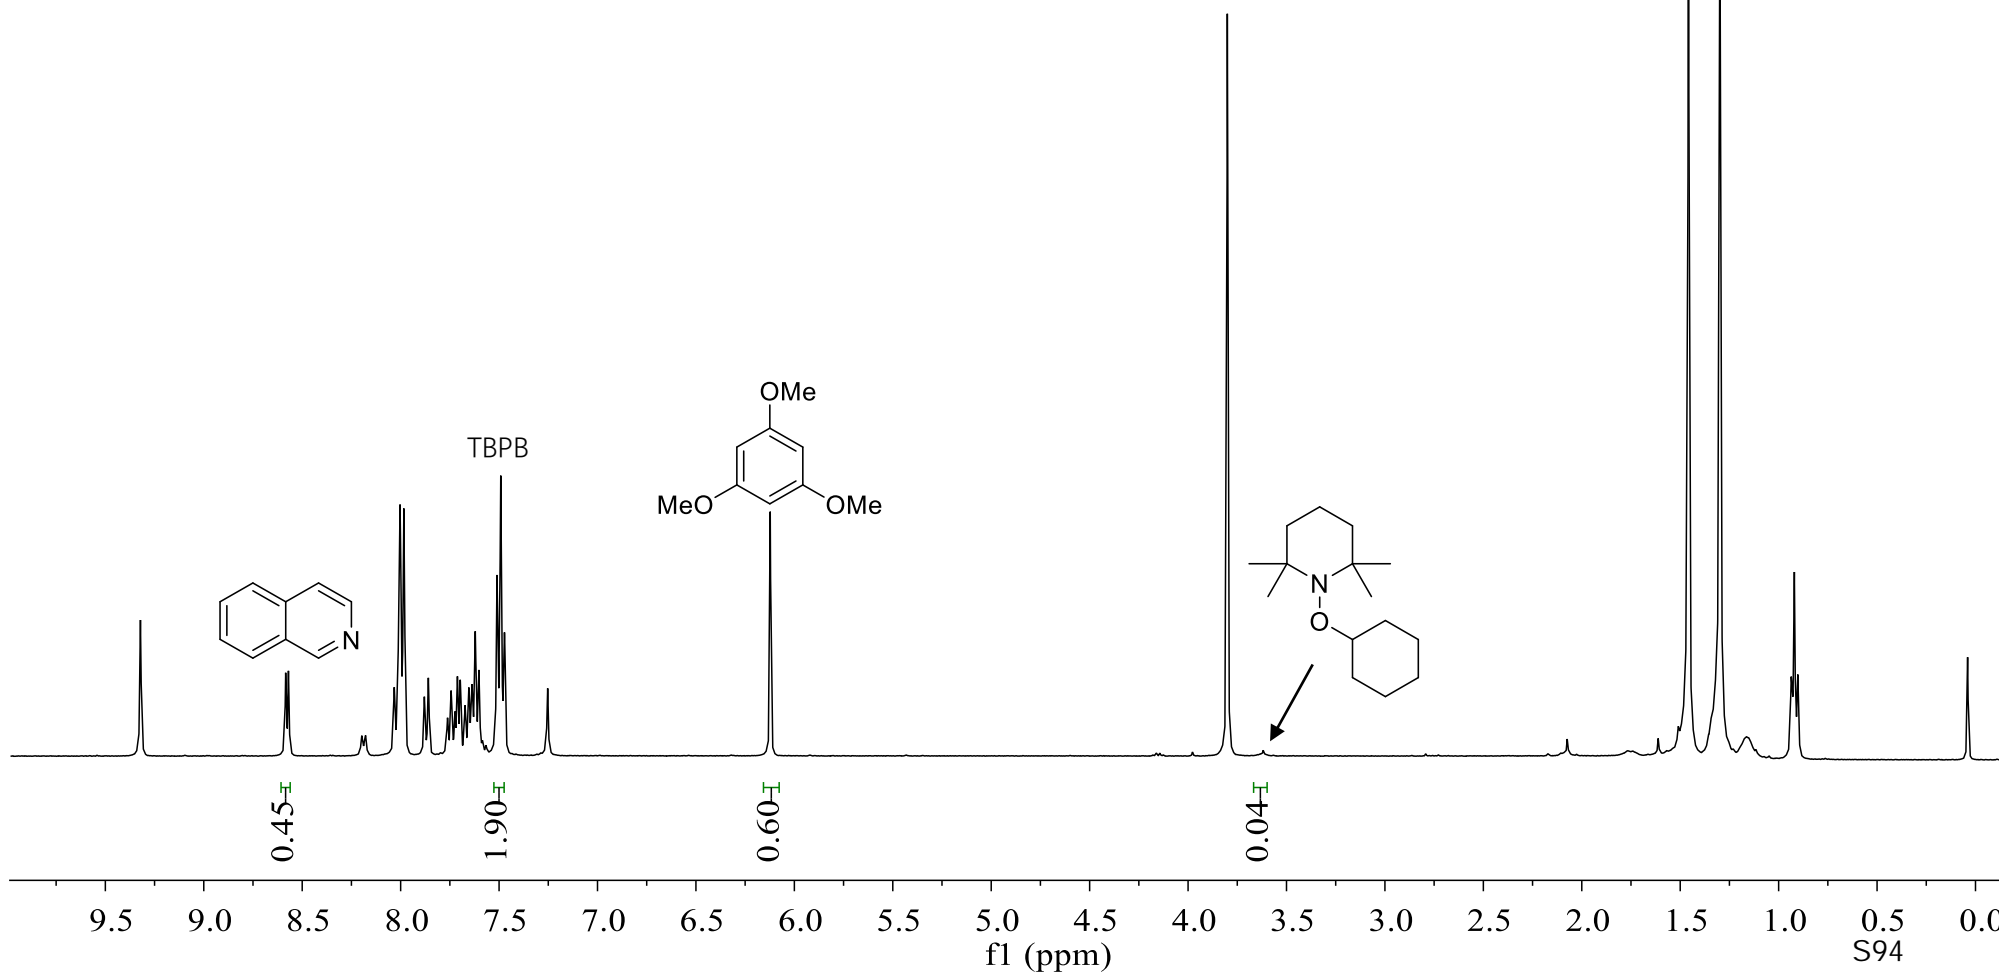

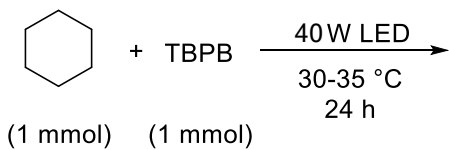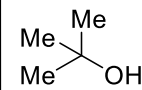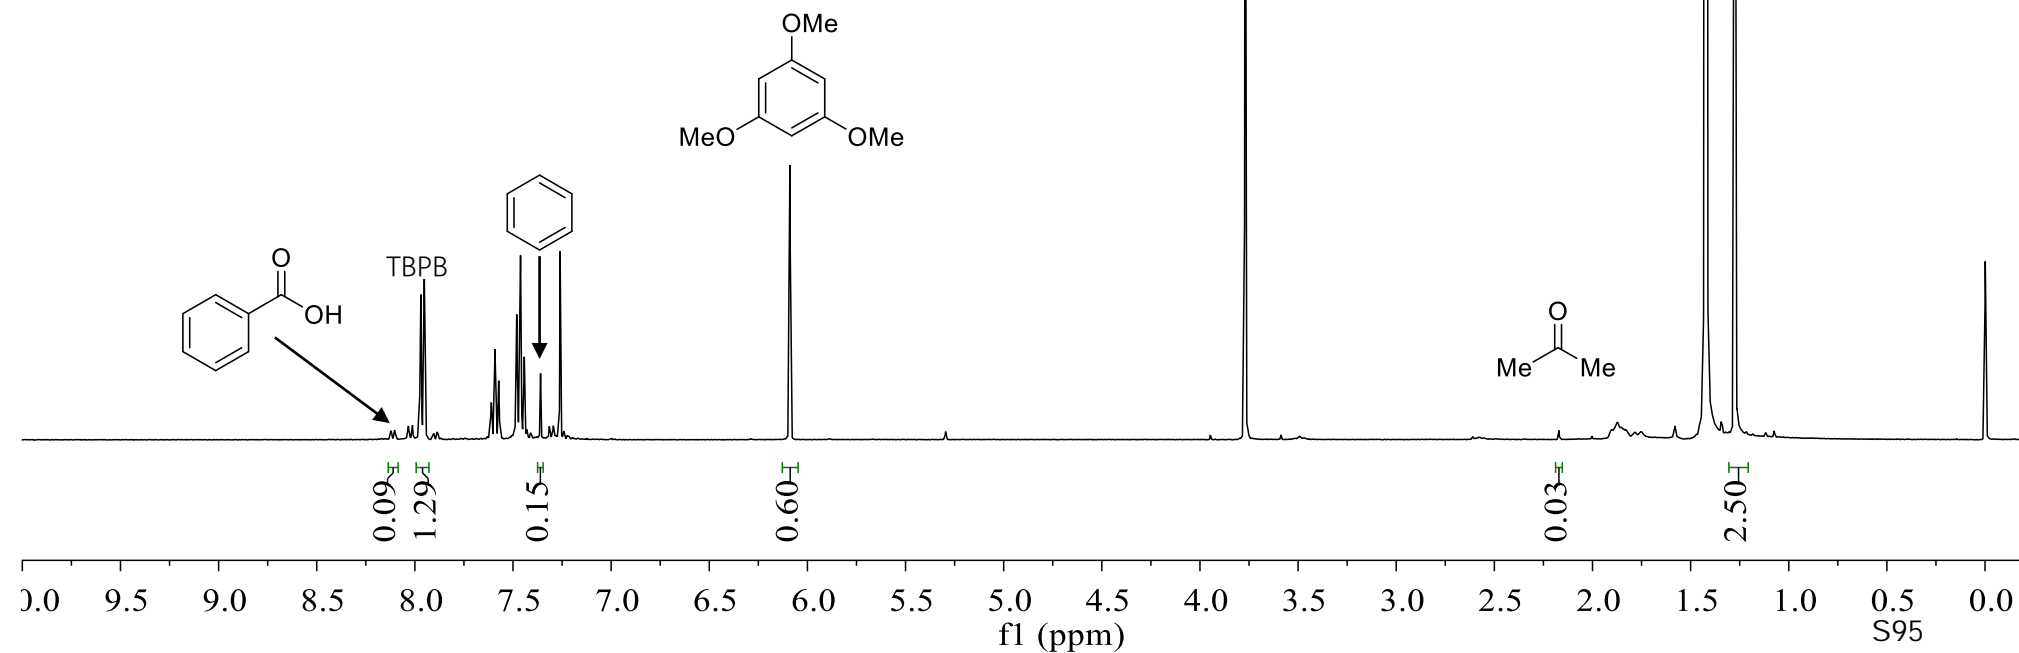

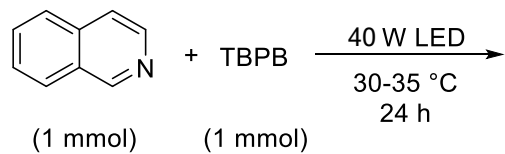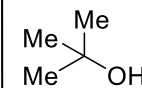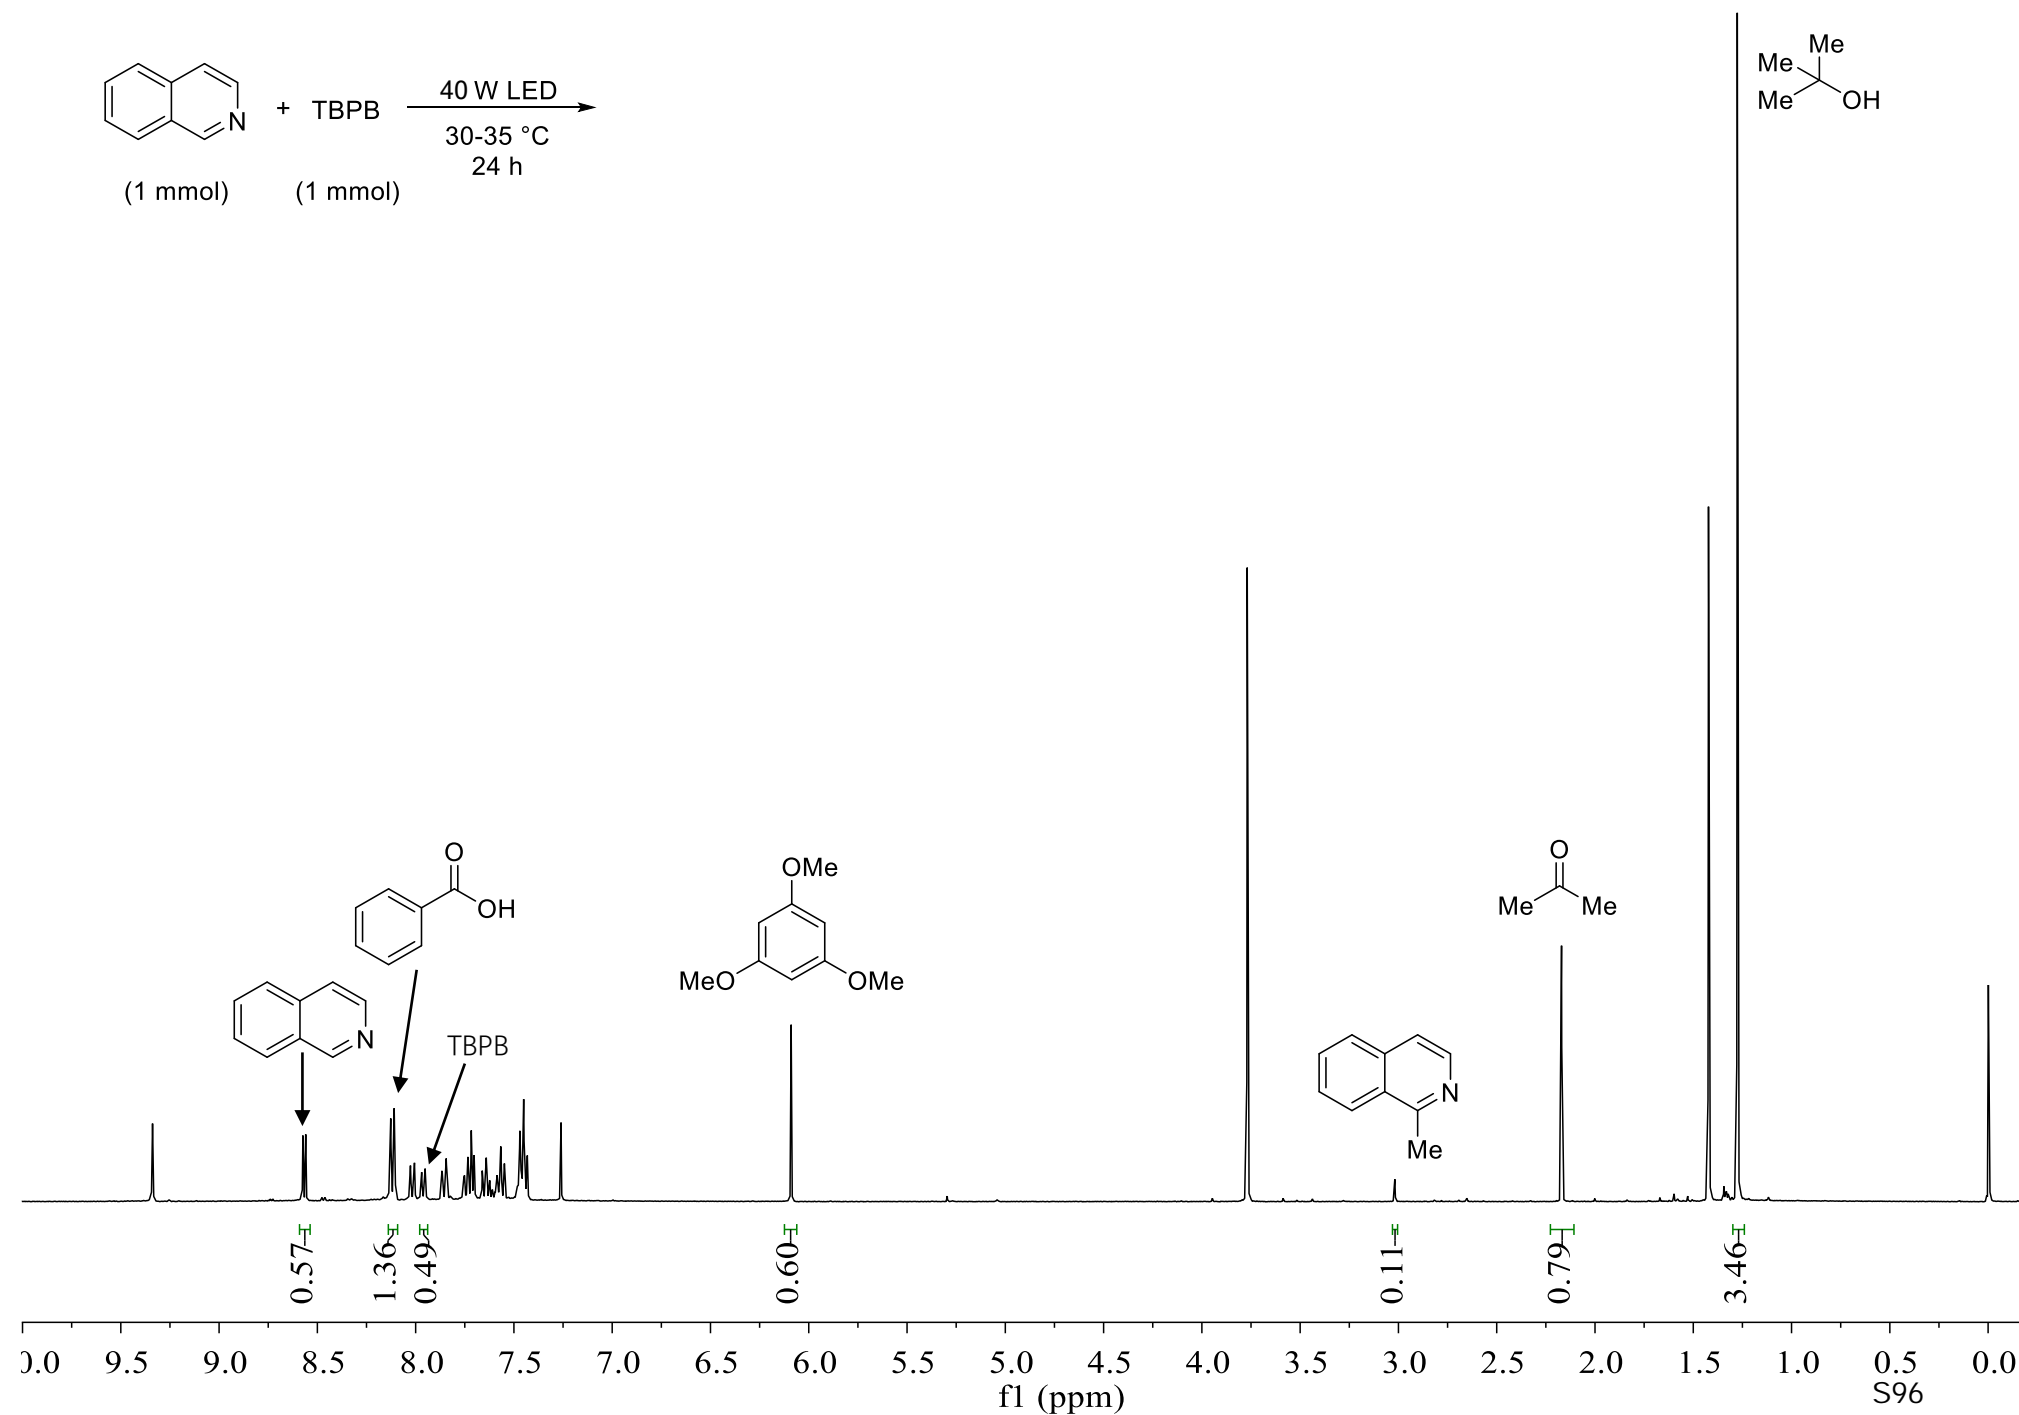

Supplement: d2qo01558g3.pdf [file d2qo01558g3.pdf]
